# Supplementary material for: The impact of obesity on the accuracy of DXA BMD for DXA-equivalent BMD estimation
Source: BMC Musculoskelet Disord. 2022 Dec 26;23:1130. doi: 10.1186/s12891-022-06076-0 (PMC9791746; doi:10.1186/s12891-022-06076-0)
Supplement: Supplementary file 2 — Additional file 2. [file 12891_2022_6076_MOESM2_ESM.xlsx]

## Sheet: All the BMI cases
ID	CT	CT_1 date	Sex	Age	Height(cm)	Weight(kg)	BMI (kg2/m2)	WC (cm)	ICO (WC/height)	BMD date	L1-BMC	L1-BMD	L1-T-score	L1-Z-score	hip-BMC	hip-BMD	hip-T-score	hip-Z-score	mean	std	skew	kurt	entropy	Contrast_32	Correlation_32	Energy_32	Homogeneity_32	Autoco_32	Contrast_32_v	Correlation_32_v	Energy_32_v	Homogeneity_32_v	Autoco_32_v	Contrast_64	Correlation_64	Energy_64	Homogeneity_64	Autoco_64	Contrast_64_v	Correlation_64_v	Energy_64_v	Homogeneity_64_v	Autoco_64_v	Contrast_128	Correlation_128	Energy_128	Homogeneity_128	Autoco_128	Contrast_128_v
475992	3	43458	2	56	157	42.7	17.3232	61.69	0.39293	43489	9.14	0.698	-2.1	-0.8	1.55	0.569	-2.5	-0.8	1317.05	180.246	0.426144	2.37629	1.6751	1.1154	0.974029	0.120202	0.763618	147.19	1.72179	0.959954	0.115037	0.726583	147.022	4.22265	0.976394	0.104443	0.652458	576.492	6.7908	0.962076	0.0996241	0.613816	575.849	16.7061	0.977118	0.0990071	0.550726	2281.06	27.2157
200003784	2	44000	1	46	173	52	17.3745	68.7	0.39711	44001	11.75	0.65	-2	-1.7	2.8	0.522	-3.3	-2.4	1147.58	154.206	2.09818	7.6774	1.20055	1.30702	0.965937	0.0389869	0.725096	52.2788	2.21936	0.94137	0.0346303	0.680786	51.2256	4.91165	0.968786	0.0155542	0.576989	199.56	8.63168	0.944386	0.0134624	0.532804	195.388	19.6228	0.969255	0.00863845	0.446388	780.3	34.7404
289471	3	43096	2	85	158.7	48.3	19.1776	63.95	0.402962	43083	6.44	0.691	-2.1	0.1	2.27	0.447	-3.8	-0.5	1116.29	150.84	1.48482	5.28603	1.04806	0.818226	0.982326	0.0915253	0.79044	48.9055	2.85123	0.932844	0.0873406	0.72903	44.3719	3.01511	0.984253	0.0547205	0.666918	186.954	11.4143	0.93489	0.0527686	0.612538	168.748	11.8046	0.984823	0.0431942	0.551615	730.627	45.664
312759	3	20180129	1	60	178.1	78.9	24.8742	72.3	0.405952	20180129	13.02	0.832	-1.3	-0.5	2.95	0.592	-2	-1.1	1151.86	62.7344	0.969629	8.24918	1.01803	3.33873	0.712097	0.0208098	0.525865	47.4221	4.54154	0.616766	0.018156	0.487472	47.1743	12.8574	0.72072	0.00575849	0.375105	176.173	17.7503	0.622762	0.00508536	0.341548	175.111	51.2209	0.72274	0.00189496	0.252445	679.329	70.9696
539807	3	43069	1	72	170.6	50.42	17.3239	69.7	0.408558	43073	12.87	0.866	-0.3	0	5.08	0.911	0.9	1.8	1286.97	156.212	1.78738	6.99136	1.34164	1.1028	0.956831	0.047213	0.728137	128.451	1.79532	0.929175	0.0414358	0.684727	127.809	4.06274	0.961505	0.0299656	0.593438	496.997	6.91862	0.933959	0.0253673	0.547324	494.388	15.9382	0.962791	0.0242827	0.471454	1956.37	27.6686
535303	3	20161111	1	39	179.1	72.4	22.5708	73.6	0.410944	20161111	11.08	0.869	-0.9	0.9	2.94	0.737	-0.6	1.6	1215.35	84.6034	0.504648	3.52311	0.94069	2.7575	0.867361	0.0178312	0.563454	91.7875	3.80613	0.813216	0.016313	0.532097	91.1382	10.5569	0.874306	0.00540391	0.411215	349.136	14.9112	0.818748	0.0049073	0.330995	375.457	78.6102	0.710918	0.00164708	0.228819	1469.66	88.505
535375	3	20181002	1	74	175.6	68.4	22.1823	72.3	0.411731	20181002	10.82	0.924	-0.4	1.2	3.96	0.798	0	2	1262.47	67.6866	0.245583	3.86149	0.408317	3.01201	0.771108	0.0193867	0.537268	125.112	4.19149	0.675472	0.0171319	0.503726	124.647	11.6482	0.777787	0.00563442	0.387292	478.326	16.3226	0.68326	0.00494656	0.414403	297.04	37.4499	0.809916	0.00206294	0.2808	1134.95	39.767
497642	3	20190215	1	70	179.1	75.9	23.662	74.1	0.413735	20190215	14.14	0.85	-0.5	-0.1	3.47	0.686	-1.5	-0.2	1189.64	85.7768	2.377	13.9054	1.09664	4.65896	0.683526	0.0178091	0.494425	67.4867	5.46089	0.633206	0.0169069	0.478929	67.4989	18.3319	0.69046	0.00524425	0.351709	254.773	21.5842	0.640222	0.0050582	0.338033	254.797	73.0308	0.693372	0.00196843	0.236079	988.836	86.4623
547337	3	20150526	1	49	176.9	67.5	21.5699	73.4	0.414924	20150526	17.19	1.04	0.5	0.7	4.7	0.861	0.1	0.9	1233.97	64.3418	0.382438	3.49345	0.529283	3.71269	0.710185	0.0188546	0.52055	101.489	4.97566	0.604741	0.0175762	0.483612	100.368	14.3189	0.719783	0.00536992	0.368214	386.155	19.5763	0.609886	0.00498961	0.353506	528.084	60.0938	0.665972	0.00193025	0.238719	2060.62	63.4738
422523	3	20170724	1	81	178.6	68.6	21.5061	74.2	0.415454	20170724	15.06	0.929	-0.5	0.2	4.2	0.729	-0.9	0.2	1277.66	60.8549	-0.0391183	3.27062	0.262112	3.86652	0.654596	0.018733	0.502935	137.437	4.03779	0.634091	0.0184939	0.505974	137.845	15.0837	0.663643	0.00547633	0.355528	526.501	15.9273	0.63998	0.00534495	0.357698	176.763	60.3104	0.810789	0.00168406	0.253363	694.45	72.8351
557318	2	42900	1	33	175.5	65.3	21.2011	73.23	0.417265	42900	12.75	0.877	-0.9	-0.7	4.14	0.765	-0.7	-0.4	1236.69	152.882	2.78237	12.6047	1.29129	1.1917	0.949516	0.0302286	0.687	94.0629	1.51199	0.933502	0.0269352	0.658744	91.4842	4.37398	0.954681	0.012737	0.532007	360.207	5.72664	0.938324	0.0102963	0.506533	349.761	17.0534	0.956357	0.00749304	0.397715	1410.16	22.6831
483991	3	20190103	1	60	172.1	65.6	22.1484	72.2	0.419524	20190103	12.43	0.867	-0.9	-0.3	3.02	0.61	-1.8	-1.2	1199.25	173.724	2.34091	9.8474	1.47403	1.29632	0.964562	0.0355966	0.709609	73.8711	2.41087	0.932695	0.0310673	0.669188	72.5059	4.84989	0.967979	0.0169067	0.567988	284.332	9.42388	0.936316	0.0136345	0.408579	304.745	31.6107	0.806459	0.00237193	0.294208	1183.17	38.0538
130096434	3	20130712	1	52	173.8	62.9	20.8234	73	0.420023	20130712	17.19	1.04	0.5	0.7	4.7	0.861	0.1	0.9	1233.97	64.3418	0.382438	3.49345	0.529283	3.71269	0.710185	0.0188546	0.52055	101.489	4.97566	0.604741	0.0175762	0.483612	100.368	14.3189	0.719783	0.00536992	0.368214	386.155	19.5763	0.609886	0.00498961	0.338919	381.568	56.6364	0.722594	0.00190063	0.252901	1503.91	78.1184
160091218	3	43321	1	60	168.8	55.1	19.3378	70.99	0.420557	43321	13.46	0.979	0	0.4	3.99	0.731	-0.9	0	1252.06	186.826	2.09478	7.77849	1.45416	1.08198	0.966467	0.0353099	0.717257	100.616	1.69148	0.94723	0.0324786	0.690469	100.029	3.97925	0.969959	0.0189977	0.578206	388.102	6.56247	0.950127	0.0166368	0.552548	385.606	15.6402	0.970922	0.0142766	0.4502	1523.78	26.2371
170011068	3	20200805	2	56	171.7	69.2	23.4728	72.3	0.421083	20200805	6.28	0.554	-3.6	-1.7	3.34	0.625	-1.7	-0.2	1125.49	49.0884	0.032268	2.99732	0.816519	3.97745	0.484871	0.0249885	0.512911	33.0618	3.26798	0.577954	0.0271038	0.524882	33.1517	15.3735	0.494451	0.00706844	0.36883	120.637	12.4473	0.592144	0.00759349	0.354592	193.512	42.5668	0.77032	0.00202858	0.262485	751.487	57.3064
140135686		20161011	1	59	180.3	80.3	24.7015	76	0.42152	20161011	13.93	0.877	-0.9	-0.2	4.67	0.848	0	0.9	1204.27	58.769	0.518293	3.39796	0.743895	2.7111	0.7558	0.0241564	0.551103	79.5263	3.07361	0.717154	0.0235258	0.536191	79.1323	10.4485	0.762323	0.00667124	0.395951	300.547	11.8309	0.724968	0.00646634	0.387415	299.021	41.9434	0.761692	0.00216593	0.269872	1166	46.9086
140135686	3	20161011	1	59	174.8	76.2	24.9386	73.7	0.421625	20161011	13.93	0.877	-0.9	-0.2	4.67	0.848	0	0.9	1204.27	58.769	0.518293	3.39796	0.743895	2.7111	0.7558	0.0241564	0.551103	79.5263	3.07361	0.717154	0.0235258	0.536191	79.1323	10.4485	0.762323	0.00667124	0.395951	300.547	11.8309	0.724968	0.00646634	0.387415	299.021	41.9434	0.761692	0.00216593	0.269872	1166	46.9086
510328	3	20200805	1	53	177.6	69.1	21.9075	75.1	0.42286	20200805	15.7	0.901	-0.7	-0.3	4.73	0.902	0.5	0.9	1237.71	64.8677	0.533035	4.50671	0.54151	3.50972	0.709441	0.0199788	0.520912	104.34	6.40887	0.463305	0.0165528	0.454888	102.143	13.5951	0.719432	0.00569155	0.371333	396.77	25.4969	0.466648	0.00479626	0.366026	327.695	50.1905	0.713491	0.00211262	0.250334	1290.51	59.0465
535375	3	20191010	1	75	175.6	68.4	22.1823	74.3	0.423121	20191010	11.79	0.874	-0.8	-0.8	3.01	0.668	-1.3	-0.8	1263.99	158.115	1.50504	6.7917	1.44304	1.42619	0.959669	0.0389158	0.691539	117.477	1.85965	0.946861	0.0355712	0.663292	115.843	5.33512	0.963353	0.0260615	0.548821	455.122	7.27707	0.949346	0.0235334	0.384653	274.868	31.5476	0.831434	0.00219199	0.294	1075.37	52.3041
150069988	3	20190524	1	58	177	71.2	22.7265	74.9	0.423164	20190524	8.67	0.667	-2.6	-0.5	3.18	0.706	-0.9	1.2	1100.16	67.9871	0.564407	3.84743	0.706181	3.3335	0.74891	0.0235144	0.552814	26.1895	4.44097	0.6592	0.0194609	0.501571	25.3299	12.906	0.760166	0.00737114	0.401187	95.5458	17.4985	0.668737	0.00573094	0.33525	317.687	58.3948	0.66501	0.00186509	0.244731	1251.01	72.3852
150082295	3	20190724	1	52	172.8	71	23.7778	73.2	0.423611	20190724	14.2	1.026	0.3	0.7	3.77	0.739	-0.9	-0.1	1208.18	74.3732	1.14425	7.9278	0.886862	4.17485	0.714922	0.0161886	0.502302	82.1525	5.62266	0.615141	0.0144168	0.469544	81.3931	16.1057	0.724515	0.0046503	0.353672	310.924	21.9062	0.624368	0.00429008	0.328947	307.851	64.3698	0.725103	0.00176379	0.234673	1208.66	87.2918
130172484	3	20191218	1	58	174.6	62.1	20.3706	74.1	0.424399	20191218	15.51	1.056	0.6	0.9	4.94	1.02	1.4	2.3	1276.83	87.8858	2.0797	13.5238	0.514887	2.91849	0.76836	0.0253485	0.552916	131.72	3.84813	0.676259	0.0235271	0.535078	130.787	11.4069	0.778866	0.00898588	0.409999	505.553	15.2574	0.686704	0.00761848	0.391292	501.602	45.1772	0.783248	0.00485218	0.295654	1981.96	61.0328
150065937	3	20190723	1	58	173	68.5	22.8875	73.7	0.426012	20190723	9.14	0.771	-1.7	-0.2	3.92	0.768	-0.3	1.2	1180.13	56.0626	0.289793	3.3353	0.949915	3.23784	0.677252	0.0223569	0.538724	63.1135	3.12423	0.685065	0.0226218	0.531046	63.1157	12.3436	0.689669	0.00643222	0.385563	237.837	11.9367	0.695826	0.00632406	0.361636	337.43	47.7293	0.735238	0.0021302	0.268013	1331.73	62.3923
120121393	3	20151006	1	54	175.1	74.7	24.364	74.6	0.426042	20151006	9.57	0.741	-2	-1.2	3.31	0.726	-1	-0.1	1230.84	52.8627	0.692931	7.29344	0.397018	2.26335	0.717684	0.0308733	0.578597	97.2879	2.35687	0.705014	0.0303163	0.558352	97.4474	8.39209	0.732981	0.00863147	0.426031	369.008	8.79677	0.718917	0.00841929	0.411002	369.551	33.5251	0.733496	0.00259789	0.292779	1437.11	34.9127
506573	3	20200717	1	66	177.6	66.9	21.21	75.7	0.426239	20200717	15.11	1.065	0.7	0.9	4.99	0.871	0.2	1.3	1226.26	175.848	2.16386	8.72957	1.43829	7.91852	0.750283	0.0139095	0.475663	84.5009	7.7959	0.753999	0.0142071	0.46364	84.8015	32.0954	0.753417	0.00830761	0.345528	323.932	31.3122	0.759563	0.00881329	0.341166	325.327	128.335	0.756314	0.00688272	0.254841	1266.62	124.828
477774	3	20131023	1	54	175.2	69.3	22.5769	74.7	0.42637	20131023	8.05	0.694	-2.4	-0.4	3.79	0.84	0.3	2.5	1166.08	66.9063	-0.00264673	2.8121	0.988774	3.76959	0.734313	0.01708	0.520853	56.9568	5.38889	0.622857	0.014437	0.474312	55.811	14.5885	0.741976	0.00491417	0.368684	213.35	21.2392	0.627132	0.00409993	0.374087	162.53	62.3945	0.643813	0.00197986	0.240772	631.226	59.1152
30046	3	20170406	1	65	178.9	69.1	21.5902	76.3	0.426495	20170406	13.93	0.877	-0.9	-0.2	4.67	0.848	0	0.9	1204.27	58.769	0.518293	3.39796	0.743895	2.7111	0.7558	0.0241564	0.551103	79.5263	3.07361	0.717154	0.0235258	0.536191	79.1323	10.4485	0.762323	0.00667124	0.395951	300.547	11.8309	0.724968	0.00646634	0.375746	251.244	64.7121	0.683394	0.00173292	0.246244	968.957	58.4559
483991	3	20161223	1	57	172.1	65.6	22.1484	73.6	0.427658	20161223	9.16	0.709	-2.3	-0.9	2.43	0.49	-2.9	-1.9	1188.93	149.205	1.26574	4.10067	1.3757	1.2337	0.972221	0.0351992	0.706734	77.8099	1.37547	0.968228	0.0341699	0.71098	75.8573	4.64463	0.974441	0.0188558	0.571462	300.027	5.20896	0.970538	0.0161737	0.397809	311.608	33.6505	0.803322	0.00210775	0.285709	1212.77	40.4168
130029443		20130304	1	49	176	77.7	25.0839	75.3	0.427841	20130304	21.84	1.25	2.2	2.2	4.87	0.886	0.3	1	1343.86	96.2403	1.08644	7.26048	0.850575	3.2381	0.74649	0.0724845	0.624163	186.984	2.86142	0.770847	0.0702682	0.616289	187.434	12.995	0.757531	0.0408188	0.488279	727.96	11.6691	0.777301	0.0393951	0.477075	729.567	52.3228	0.761464	0.0313836	0.380491	2873.61	47.4784
130038528	3	20130320	1	50	176.6	64.3	20.6172	75.8	0.429219	20130320	10.26	0.744	-2	-1.2	3.43	0.649	-1.6	-0.8	1162.19	44.4869	0.219455	3.24977	0.994844	2.45745	0.618378	0.0331242	0.566884	51.0733	2.53036	0.602569	0.0333794	0.567587	50.5125	9.36643	0.629511	0.00892463	0.408447	190.285	9.50952	0.619152	0.00900865	0.417007	188.143	36.9433	0.632048	0.002647	0.279846	733.879	37.8333
130044266	3	20190405	1	55	178.2	64.8	20.4061	76.6	0.429854	20190405	13.33	0.888	-0.8	-0.2	4.07	0.776	-0.6	0.3	1230.8	64.348	0.0117257	2.86531	0.563981	3.51894	0.732917	0.0186219	0.529901	99.5827	4.83623	0.629439	0.0160294	0.47662	98.3937	13.5934	0.739985	0.00525513	0.383026	379.079	18.9933	0.633755	0.00446199	0.333859	374.459	54.3023	0.739526	0.00183707	0.256956	1476.51	75.3636
200003784	3	43839	1	46	173	52	17.3745	74.37	0.429884	43843	11.47	0.666	-1.9	-1.6	2.65	0.501	-3.6	-2.7	1114.85	141.389	1.79088	7.12209	1.04237	1.59096	0.959657	0.0685817	0.715404	43.8342	2.87212	0.924435	0.0696999	0.69344	41.3627	6.12578	0.9623	0.0366246	0.588321	166.33	11.3889	0.927272	0.0373485	0.569055	156.314	24.3378	0.96308	0.024666	0.46757	648.764	45.7799
150149206	3	20161005	1	42	170.2	61.5	21.2303	73.2	0.430082	20161005	13.29	0.94	-0.4	0	4.05	0.87	0.2	0.8	1208.45	56.3522	0.658688	6.0091	0.682949	3.59524	0.623463	0.022035	0.51423	81.4016	3.60842	0.620655	0.0223282	0.525327	80.8975	13.9355	0.632197	0.00614004	0.363792	307.407	13.8982	0.631625	0.00619173	0.380566	305.503	55.4048	0.63473	0.00201475	0.244084	1193.44	55.4167
459886	3	20120904	1	54	173.2	70.5	23.5014	74.5	0.430139	20120904	10.08	0.783	-1.6	-0.3	2.64	0.566	-2.2	-1.1	1244.76	56.5918	-0.0237261	3.42823	0.345487	3.73878	0.6328	0.0223858	0.510875	109.435	3.58871	0.64582	0.0224363	0.519276	109.143	14.4623	0.640469	0.00623947	0.361781	417.034	13.8653	0.653851	0.00629422	0.377889	209.692	34.2249	0.723455	0.00262932	0.294071	814.79	50.454
130042938		20130327	1	45	179.4	75.5	23.4586	77.2	0.430323	20130327	11.56	0.803	-1.5	-1.2	4.43	0.827	-0.2	0.2	1216.83	60.5859	0.325301	4.07719	0.629095	3.52039	0.688364	0.0219096	0.526475	88.5092	4.72715	0.585476	0.0193517	0.490147	87.3938	13.5789	0.696887	0.00608293	0.379542	334.958	18.3103	0.595373	0.00547885	0.356593	522.194	38.6898	0.696614	0.00251255	0.271817	2061.87	62.0327
160168413		20200722	1	60	182.2	81.2	24.4602	78.5	0.430845	20200722	12.34	0.852	-1.1	-0.4	3.49	0.693	-1.2	-0.3	1185.92	61.4433	0.952109	4.40404	0.969691	2.49386	0.788074	0.0263029	0.559527	67.5028	3.17636	0.721097	0.0256354	0.546393	66.1064	9.51749	0.79587	0.00717595	0.407415	254.823	12.305	0.727265	0.00691291	0.391561	249.225	37.655	0.798569	0.00218919	0.283822	988.14	48.9314
130034755	3	20130313	1	39	167.2	65.9	23.5729	72.1	0.43122	20130313	11.47	0.916	-0.1	0.8	3.3	0.709	-0.9	0.5	1242.23	56.0127	0.220175	3.22165	0.330248	1.64678	0.830407	0.0300209	0.614181	108.024	2.70329	0.717968	0.0245029	0.560895	107.466	6.1807	0.841443	0.00826237	0.450113	411.98	10.4865	0.727631	0.00667494	0.314675	387.885	54.1	0.722026	0.0020081	0.254138	1547.1	101.842
170096229	3	20180712	1	60	171.2	64.5	22.0066	74	0.432243	20180712	12.31	0.887	-0.8	-0.2	4.22	0.829	-0.1	0.7	1265.25	62.447	0.0354652	3.10747	0.302519	4.62123	0.615554	0.0173679	0.492011	127.477	4.46248	0.627346	0.017417	0.497929	126.703	18.2382	0.618051	0.00517076	0.343286	487.584	17.246	0.636988	0.00497138	0.396345	210.571	31.9601	0.724247	0.00245842	0.288586	823.158	46.1474
130172581		20171024	1	55	176.7	79.9	25.5902	76.5	0.432937	20171024	9.56	0.638	-2.9	-1.8	3.09	0.515	-2.7	-1.8	1133.95	45.7114	0.270781	4.53633	0.863121	2.14952	0.672916	0.0361896	0.579782	36.8467	2.57437	0.605378	0.0345378	0.564955	36.483	8.19429	0.682509	0.00974331	0.422306	135.282	9.66332	0.62277	0.00937062	0.412213	133.9	32.4838	0.685459	0.00282902	0.284494	517.691	38.4232
170089702	3	20180621	2	38	166.3	63	22.7801	72.1	0.433554	20180621	12.49	0.834	-1.3	-0.6	3.72	0.727	-1	-0.3	1197.6	54.398	0.901693	6.32745	0.785868	3.24745	0.631035	0.0250625	0.526078	73.4919	3.45471	0.614476	0.0246731	0.528364	73.471	12.4078	0.640982	0.00697815	0.380814	276.387	13.18	0.625228	0.00682557	0.39129	455.433	29.5014	0.772272	0.00283054	0.310099	1795.3	47.4975
130081795	3	20171222	1	35	179.5	79.9	24.7981	77.9	0.433983	20171222	12.02	0.746	-2	-1.6	4.66	0.855	0.1	0.4	1248.1	52.2905	0.31494	3.76194	0.248962	2.12039	0.747242	0.0299905	0.582511	112.545	3.26956	0.610794	0.0254802	0.524318	110.971	8.12763	0.756554	0.00818386	0.429074	429.281	12.8488	0.615255	0.00696754	0.380484	422.974	32.0276	0.759636	0.00259609	0.295452	1674.41	50.9494
160168413	3	43437	1	58	170.5	66.9	23.0132	74.05	0.434311	43437	11.49	0.831	-1.3	-0.6	3.44	0.703	-1.2	-0.3	1215.02	143.295	1.35485	4.60785	1.42906	1.13188	0.970174	0.0394103	0.724325	89.4507	1.84421	0.948787	0.0321448	0.671382	86.1034	4.12281	0.973411	0.0197727	0.589934	344.25	7.0782	0.951693	0.0136818	0.558763	376.944	19.4556	0.971997	0.0222537	0.455001	1502.04	30.8942
510388	3	20140522	1	46	172.2	71.6	24.1461	74.8	0.434379	20140522	12.84	0.864	-1	-0.5	3.56	0.698	-1.2	-0.5	1204.09	70.0704	-0.052319	3.68944	0.822295	5.34338	0.644256	0.0155331	0.477482	79.8581	7.10347	0.524174	0.0140308	0.441349	78.963	20.9404	0.649644	0.00452963	0.332264	302.605	27.9401	0.530323	0.00409099	0.302569	299.073	83.3184	0.651015	0.00166847	0.222288	1175.63	111.33
422245	3	20170323	1	55	177.3	72.8	23.1587	77.2	0.43542	20170323	14.32	0.843	-1.2	-0.5	4.35	0.776	-0.6	0.3	1183.43	68.1313	0.0357438	3.15768	0.940251	5.20849	0.645598	0.0147827	0.469054	66.4479	5.21296	0.637202	0.0153202	0.475001	66.1119	20.2795	0.653472	0.00433923	0.325034	249.854	20.3719	0.643718	0.00452127	0.350153	484.822	72.4032	0.620441	0.00185567	0.231184	1905.15	68.2843
130143662	3	20170628	1	58	170.4	65.5	22.5581	74.2	0.435446	20170628	12.2	0.801	-1.5	-1	3.58	0.707	-1.1	-0.6	1199.53	50.7257	0.458321	3.77781	0.716683	2.30547	0.722791	0.0301426	0.571454	75.0613	2.77337	0.656867	0.0286949	0.555767	74.093	8.6844	0.733673	0.00814489	0.412747	283.232	10.6301	0.664711	0.00776138	0.367218	362.336	55.9623	0.74254	0.00197011	0.251985	1413.08	57.8235
130036025	3	20130315	1	56	177.4	74.8	23.7681	77.3	0.435738	20130315	14.36	0.967	-0.1	0.3	4.61	0.83	-0.01	0.8	1259.3	57.5578	0.626962	3.36089	0.210008	2	0.798561	0.0280033	0.600047	121.888	2.84148	0.708084	0.0249225	0.562293	119.981	7.41237	0.812622	0.00796771	0.447762	466.166	10.7483	0.722647	0.00706547	0.409252	458.622	29.1628	0.815964	0.00252657	0.31219	1821.34	42.5256
549802	3	20181220	1	72	173.2	73.2	24.4014	75.5	0.435912	20181220	9.66	0.714	-2.3	-1.9	3.41	0.684	-1.3	-1	1163.26	92.4124	0.989498	5.14627	1.1006	6.73065	0.707111	0.0113679	0.453613	56.0495	6.33836	0.72707	0.0116263	0.468514	56.8628	26.4319	0.715165	0.00333933	0.31991	210.934	25.0535	0.732554	0.00339783	0.329328	213.948	105.432	0.716656	0.00132167	0.216453	817.029	99.4901
120121238	3	20150825	2	36	169.5	70.1	24.3994	73.9	0.435988	20150825	13.6	0.966	0	0.1	3.77	0.797	-0.1	0.3	1287.78	60.0634	1.292	5.35792	0.269784	1.38482	0.830329	0.0389686	0.64624	144.087	1.81351	0.773134	0.035935	0.619752	142.934	5.02642	0.848977	0.0124154	0.498371	553.998	6.88311	0.788709	0.0105707	0.466551	549.273	19.6768	0.853436	0.00502346	0.362926	2169.39	27.2041
120133022		20121019	1	55	182.7	84.3	25.2552	79.8	0.436782	20121019	13.48	0.915	-0.6	-0.1	3.73	0.67	-1.4	-0.6	1227.57	54.0315	0.168491	3.0622	0.43573	3.43782	0.630622	0.0231451	0.52297	95.4577	3.94801	0.573227	0.0221442	0.512292	94.9801	13.3308	0.639455	0.00637245	0.369809	361.582	15.2773	0.584634	0.00609633	0.367552	359.922	52.8423	0.642146	0.00207512	0.247449	1407.12	60.2291
130092454	3	20171211	2	62	166.4	61.7	22.2832	72.7	0.436899	20171211	8.85	0.737	-2	-0.4	2.86	0.655	-1.4	0.2	1277.54	168.747	1.259	4.1914	1.4974	1.14387	0.965889	0.0596979	0.744481	120.429	1.7043	0.948241	0.0517087	0.709026	119.182	4.30837	0.969	0.039616	0.61403	466.906	6.65651	0.951083	0.0336719	0.371457	554.494	53.8793	0.744419	0.00260115	0.266068	2184.22	65.7016
130164803	3	20161114	2	27	166.7	67.4	24.2543	72.9	0.437313	20161114	14.11	1.088	1	1.3	4.67	0.925	1.1	1.6	1306.5	78.6936	0.307579	2.73071	0.629404	3.12907	0.776293	0.0373639	0.576522	160.959	2.72973	0.802537	0.0381913	0.594612	160.475	12.3358	0.78783	0.0196732	0.438458	622.504	10.7486	0.812669	0.0191314	0.453266	620.371	49.3189	0.791496	0.0142454	0.327674	2451.04	42.9566
150069302		20150527	1	42	176.6	80.2	25.7154	77.3	0.437712	20150527	12.2	0.801	-1.5	-1	3.58	0.707	-1.1	-0.6	1199.53	50.7257	0.458321	3.77781	0.716683	2.30547	0.722791	0.0301426	0.571454	75.0613	2.77337	0.656867	0.0286949	0.555767	74.093	8.6844	0.733673	0.00814489	0.412747	283.232	10.6301	0.664711	0.00776138	0.399926	279.452	34.2467	0.736419	0.00244208	0.283049	1098.83	41.9477
467921	3	20191111	2	62	167.2	69.4	24.8249	73.2	0.437799	20191111	7.96	0.61	-2.9	-1	2.55	0.528	-2.9	-0.9	1155.39	42.3245	0.230572	4.70754	0.999998	1.27217	0.781781	0.0502745	0.652827	47.5382	1.19833	0.791982	0.051684	0.663583	47.2789	4.52993	0.800274	0.0139601	0.496492	176.621	4.30056	0.808091	0.0143698	0.506532	175.527	17.4435	0.806932	0.00397245	0.352942	679.672	16.73
140145087		20171025	1	63	181.7	82.2	24.8979	79.6	0.438085	20171025	15.18	0.925	-0.5	0.1	4.67	0.833	-0.1	0.9	1207.37	63.5868	0.154981	3.67094	0.75966	4.68906	0.626693	0.0173866	0.490283	81.5911	4.42909	0.649455	0.0176874	0.492998	81.5055	18.2224	0.632639	0.00482096	0.343207	308.072	17.0178	0.659192	0.00486182	0.34638	307.987	72.2083	0.634943	0.00162218	0.230878	1197.15	67.7802
120072044	3	20151019	1	58	176.8	64.6	20.6666	77.5	0.438348	20151019	14.46	0.914	-0.6	0	3.88	0.754	-0.7	0.2	1177.72	57.0819	0.634815	4.49323	0.972575	2.53994	0.753394	0.0247188	0.554543	62.0799	3.31814	0.664556	0.0224155	0.521894	60.9975	9.67796	0.763306	0.00665153	0.402656	232.481	12.8678	0.671981	0.00610212	0.370963	228.142	38.5268	0.764133	0.00205292	0.277286	899.536	50.9235
130151544	3	20190605	2	72	168.1	61.6	21.7994	73.7	0.43843	20190605	10.4	0.834	-1.3	-0.5	3.3	0.629	-1.8	-0.9	1207.99	58.1583	0.0132927	3.09506	0.680775	2.25054	0.79291	0.025459	0.575694	82.4082	2.68358	0.753478	0.0232118	0.547723	82.335	8.53859	0.800861	0.00690454	0.420055	311.89	10.21	0.762158	0.00634753	0.373738	277.125	31.1591	0.848028	0.00219512	0.29791	1097.71	53.211
539807	3	20190918	1	74	173.8	71.6	23.7036	76.2	0.438435	20190919	8.06	0.691	-2.4	-0.5	2.91	0.677	-1.2	0.7	1187.67	54.3874	0.952207	4.68359	0.907555	1.76707	0.805777	0.0343427	0.612262	67.9762	2.12256	0.767646	0.0321475	0.582069	67.3433	6.7311	0.812761	0.00939917	0.453912	255.428	8.16707	0.773639	0.00889798	0.424552	252.857	26.586	0.814842	0.00279075	0.31494	989.852	32.0579
150069988		20190524	1	58	179.6	78.3	24.2744	78.8	0.438753	20190524	14.69	0.885	-0.8	-0.2	3.85	0.731	-0.9	0	1212.74	59.2618	0.253097	3.8164	0.658294	3.90641	0.649787	0.0206511	0.513987	85.0891	4.71875	0.573028	0.0189579	0.478519	84.1085	14.8117	0.661795	0.00570336	0.368027	321.754	18.275	0.578812	0.00535899	0.33525	317.687	58.3948	0.66501	0.00186509	0.244731	1251.01	72.3852
319779	3	20161004	1	60	170.7	72.2	24.7782	74.9	0.438781	20161004	11.38	0.736	-2.1	-1.1	3.61	0.673	-1.4	-0.4	1159.72	51.6498	0.169137	4.27613	1.00697	3.58629	0.579864	0.0241975	0.517819	50.058	3.11111	0.632979	0.0255264	0.539292	49.8208	13.8274	0.587612	0.00663352	0.367868	186.479	11.8375	0.644311	0.0069976	0.390765	185.651	54.5803	0.591418	0.0020193	0.247937	719.105	46.7157
130153089		20151008	1	47	176.3	78.9	25.3847	77.5	0.439592	20151008	16.47	1.096	0.9	1.1	4.71	0.923	0.6	1.3	1243.92	61.8646	0.0299079	3.67513	0.455582	3.18889	0.733776	0.0230074	0.544331	109.342	2.78205	0.763507	0.0237737	0.559013	109.692	12.2372	0.743291	0.00626543	0.397597	417.656	10.6048	0.773694	0.00642486	0.408321	419.098	48.6272	0.74495	0.00201728	0.270394	1630.43	42.0167
140149863		20191129	1	58	181	77.1	23.5341	79.6	0.439779	20191129	13.17	0.885	0.3	0.5	5.5	0.953	1.4	2.2	1087.46	47.3568	0.63328	5.1766	0.339611	2.09787	0.681005	0.0356128	0.591337	18.4736	2.74142	0.583321	0.0322772	0.557238	17.9982	8.15988	0.690208	0.00942896	0.431895	65.8237	10.78	0.591553	0.00870233	0.381222	149.045	50.7307	0.702856	0.00187601	0.252661	576.825	48.9709
330683	3	43483	2	49	169.1	52.2	18.2551	74.4	0.439976	43483	12.43	0.867	-0.9	-0.3	3.02	0.61	-1.8	-1.2	1199.25	173.724	2.34091	9.8474	1.47403	1.29632	0.964562	0.0355966	0.709609	73.8711	2.41087	0.932695	0.0310673	0.669188	72.5059	4.84989	0.967979	0.0169067	0.567988	284.332	9.42388	0.936316	0.0136345	0.526036	278.79	19.2327	0.968675	0.0116409	0.43745	1115.28	37.983
170072845	3	43256	2	55	160.3	47.6	18.5242	70.53	0.439988	43256	9.16	0.709	-2.3	-0.9	2.43	0.49	-2.9	-1.9	1188.93	149.205	1.26574	4.10067	1.3757	1.2337	0.972221	0.0351992	0.706734	77.8099	1.37547	0.968228	0.0341699	0.71098	75.8573	4.64463	0.974441	0.0188558	0.571462	300.027	5.20896	0.970538	0.0161737	0.563302	292.135	18.3095	0.975116	0.0131333	0.438792	1176.58	20.7104
180166440	3	44036	2	48	177.5	71	22.5352	78.13	0.440169	44036	12.53	0.823	-1.3	-1.2	3.88	0.779	-0.2	0.1	1280.98	148.962	1.29496	4.7486	1.39466	0.962201	0.967682	0.0593594	0.735247	128.269	1.88224	0.935489	0.0549941	0.720007	127.901	3.50478	0.971563	0.0393947	0.607572	497.379	7.41988	0.93842	0.0359617	0.599983	511.415	19.6753	0.966544	0.0546476	0.498287	2041.19	21.4048
130166610	3	20161212	1	56	175.8	69.5	22.4878	77.4	0.440273	20161212	17.47	1.077	0.9	1.1	3.84	0.779	-0.2	0.2	1275.23	55.7473	1.34719	8.22918	0.162148	1.5376	0.804287	0.0373961	0.632263	134.404	2.37092	0.692939	0.0315061	0.574678	132.894	5.66972	0.819813	0.0104683	0.477444	515.374	9.05204	0.707103	0.00854227	0.345967	466.5	87.7183	0.612421	0.00170943	0.215027	1831.96	78.1907
180166440	3	43452	2	46	177.5	71	22.5352	78.18	0.440451	43452	13.22	0.833	-1.3	-0.5	4.54	0.88	0.3	1.2	1188.5	57.388	0.69808	4.63701	0.901567	2.97143	0.714059	0.024391	0.539565	68.3308	3.0211	0.700495	0.0253326	0.545811	67.2999	11.16	0.726571	0.00679466	0.392344	257.759	11.4169	0.711286	0.00705205	0.577708	444.67	24.7922	0.970471	0.0431304	0.479477	1777.77	30.7696
400613	3	20191105	1	57	169.3	67.5	23.5499	74.6	0.440638	20191105	9.82	0.797	-1.5	-0.3	3.11	0.603	-1.9	-0.9	1161.81	49.8128	-0.371946	4.44776	0.986615	1.76581	0.772913	0.0384033	0.616353	51.7858	2.02574	0.735544	0.0359482	0.5996	51.9863	6.62279	0.787114	0.0105853	0.459158	192.697	7.6968	0.748476	0.00993682	0.354656	314.129	54.2001	0.770573	0.00163347	0.2529	1228.4	59.995
477774	3	20151215	1	56	175.2	69.3	22.5769	77.2	0.440639	20151215	5.28	0.493	-3.9	-1.7	2.55	0.502	-3.2	-1	1119.99	58.0342	0.418375	3.50519	0.790035	2.05612	0.80324	0.0277542	0.592147	32.5733	2.89058	0.723897	0.0238275	0.540485	31.9605	7.84985	0.812035	0.00768872	0.435284	119.897	11.1687	0.732896	0.00642034	0.376559	135.431	66.6525	0.604182	0.00194178	0.243017	516.559	55.6472
130176341	3	20191108	2	48	163.8	67	24.9716	72.2	0.440781	20191108	10.54	0.748	-1.9	-1.2	2.59	0.548	-2.4	-1.8	1185.79	51.706	1.50394	6.96316	0.902653	1.33112	0.839815	0.0479244	0.652252	66.6932	1.30599	0.83721	0.0486244	0.656125	65.8271	4.80731	0.855001	0.0132388	0.497964	250.674	4.79435	0.850192	0.0134052	0.498453	247.193	18.8942	0.857458	0.00373432	0.347988	972.741	18.5272
150052186	3	20191101	2	64	165.9	66	23.9801	73.2	0.44123	20191101	10.82	0.924	-0.4	1.2	3.96	0.798	0	2	1262.47	67.6866	0.245583	3.86149	0.408317	3.01201	0.771108	0.0193867	0.537268	125.112	4.19149	0.675472	0.0171319	0.503726	124.647	11.6482	0.777787	0.00563442	0.387292	478.326	16.3226	0.68326	0.00494656	0.364018	476.495	46.3576	0.779404	0.00203305	0.265982	1871.86	65.2047
160109058	3	43224	2	34	166.1	53.9	19.5366	73.3	0.4413	43224	11.79	0.874	-0.8	-0.8	3.01	0.668	-1.3	-0.8	1263.99	158.115	1.50504	6.7917	1.44304	1.42619	0.959669	0.0389158	0.691539	117.477	1.85965	0.946861	0.0355712	0.663292	115.843	5.33512	0.963353	0.0260615	0.548821	455.122	7.27707	0.949346	0.0235334	0.523585	448.549	21.178	0.964135	0.0213272	0.421085	1791.18	29.141
451543	3	20190103	2	58	164.2	60.4	22.4022	72.5	0.441535	20181206	11.95	0.747	-2	-1.2	4.45	0.761	-0.7	0.1	1141.22	62.0829	0.146942	3.67874	0.97039	5.05133	0.575545	0.0174467	0.477379	41.3991	5.5641	0.532142	0.0169799	0.466253	41.3281	19.8529	0.579576	0.00491626	0.333589	152.465	21.8357	0.537136	0.00475573	0.490885	131.629	16.4985	0.711304	0.00520546	0.350213	509.694	18.0747
140171970	3	42321	1	69	165.7	58.3	21.2336	73.2	0.441762	42321	13.2	0.839	-1.2	-0.3	3.55	0.679	-1.3	-0.2	1188.15	145.559	2.35392	10.0787	1.37869	1.11177	0.963034	0.0331632	0.701565	68.0944	1.80139	0.939695	0.0298783	0.670167	67.0778	4.0426	0.96707	0.0133592	0.559362	260.177	6.84352	0.943842	0.0114751	0.523579	256.199	15.8548	0.968114	0.00792427	0.418789	1017.49	27.1593
535345	3	20190924	1	76	178.5	73.1	22.9425	78.9	0.442017	20190924	16.52	1.029	0.4	0.4	4.42	0.804	-0.3	-0.1	1255.68	67.9164	0.653179	4.71595	0.465271	4.59721	0.634228	0.0180811	0.500179	117.061	4.87395	0.608046	0.0172157	0.485787	117.064	17.7812	0.648366	0.00540349	0.359969	448.183	19.0616	0.619134	0.00509419	0.452037	108.751	27.5141	0.744366	0.00282118	0.300931	417.51	27.2245
120006913		20180627	1	25	178.7	75.3	23.5801	79.1	0.442641	20180627	9.57	0.759	-1.8	0.2	3.31	0.739	-0.6	1.7	1209.32	53.242	0.307526	3.27945	0.617294	2.09461	0.769916	0.0295907	0.585088	83.183	2.8303	0.678008	0.0264408	0.545671	82.0421	7.95614	0.779779	0.00824901	0.426684	313.221	10.9736	0.684983	0.00751438	0.433877	610.257	26.6355	0.792856	0.00378596	0.326975	2412.55	32.7419
557324	3	20150413	2	44	165.5	67.3	24.5708	73.3	0.4429	20150413	10.67	0.768	-1.7	-0.6	2.84	0.579	-2.1	-1.2	1288.54	67.8415	0.325822	3.95106	0.42199	3.04153	0.745003	0.0228667	0.568389	146.928	3.33862	0.712539	0.0208779	0.526165	146.169	11.8444	0.755284	0.00767266	0.41901	565.381	13.1759	0.719978	0.00685171	0.38052	562.215	47.3342	0.758322	0.00351759	0.293688	2215.68	53.0721
161487	2	43307	2	56	153.5	41.9	17.7827	68	0.442997	43312	10.17	0.813	-1.1	0	2.85	0.604	-2.1	-0.4	1196.32	162.475	1.6446	6.28798	1.43244	1.54764	0.963501	0.0285809	0.689062	77.913	3.07273	0.925698	0.0220443	0.629543	75.8432	5.90848	0.965887	0.0142063	0.549941	299.215	12.2735	0.927207	0.00977158	0.484052	290.495	23.3818	0.966619	0.00996517	0.412722	1172.59	49.4697
150090407		20190315	1	53	182.9	81.6	24.3929	81.2	0.443958	20190315	10.24	0.687	-2.5	-1.5	3.31	0.568	-2.2	-1.4	1151.97	61.4578	0.838742	5.78651	1.01829	3.17601	0.719751	0.0217778	0.538215	47.5103	4.16026	0.632804	0.0197025	0.49952	46.4638	12.4679	0.725523	0.00591423	0.387919	176.449	16.1717	0.643928	0.00547438	0.355366	172.445	49.3611	0.72824	0.00183875	0.264437	679.935	64.0014
414616	1	20131104	1	47	170.5	69.4	23.8732	75.7	0.443988	20131104	15.63	1.009	0.2	0.5	4.78	0.967	1	1.7	1226.35	61.7851	0.474941	4.24742	0.572304	4.05651	0.640806	0.0197237	0.506374	94.6298	4.81394	0.57651	0.0187711	0.488737	93.968	15.8362	0.647978	0.00546274	0.361933	358.954	18.9565	0.582013	0.00528025	0.345811	356.453	63.0324	0.650997	0.00184752	0.245003	1398.11	75.2788
170176314	1.3	20190313	1	62	170.2	71.7	24.7514	75.7	0.444771	20190313	15.21	0.904	-0.7	0	3.9	0.643	-1.6	-0.7	1193.89	60.1415	0.619604	3.98882	0.873999	2.6963	0.765625	0.023544	0.554441	72.6844	3.43429	0.697894	0.0215746	0.520766	71.9753	10.4602	0.77109	0.00649486	0.398451	273.459	13.3626	0.704132	0.00587369	0.368665	270.744	41.3358	0.773329	0.00200774	0.269198	1061.02	52.8503
140078620	3	20170410	1	44	173.7	65.6	21.7422	77.4	0.445596	20170410	15.11	1.065	0.7	0.9	4.99	0.871	0.2	1.3	1226.26	175.848	2.16386	8.72957	1.43829	7.91852	0.750283	0.0139095	0.475663	84.5009	7.7959	0.753999	0.0142071	0.46364	84.8015	32.0954	0.753417	0.00830761	0.345528	323.932	31.3122	0.759563	0.00881329	0.372331	311.041	53.5881	0.715937	0.00183957	0.248097	1215.97	54.4669
142840		20200519	1	53	181.7	83.8	25.3825	81	0.44579	20200519	14.69	1.016	0.4	1.1	4.23	0.826	0.2	1.2	1269.65	73.3611	1.60096	10.8335	0.431733	3.13196	0.727955	0.0232099	0.555026	127.475	3.15704	0.724187	0.0226546	0.542435	128.095	12.1371	0.737042	0.00681754	0.406202	489.163	12.1763	0.735012	0.00678299	0.395397	491.605	48.0872	0.739609	0.00258211	0.279536	1912.34	48.3089
120132531	3	20171116	1	59	174.2	69.9	23.0346	77.7	0.446039	20171116	7.43	0.655	-2.7	-0.7	2.92	0.642	-1.5	0.3	1143.22	44.4637	-0.104412	3.29602	0.955481	1.89744	0.701902	0.0374442	0.593028	41.4315	2.69118	0.580599	0.0322491	0.557299	40.7875	7.18462	0.714675	0.0104566	0.436174	152.936	10.4029	0.590104	0.00888084	0.438615	143.905	38.801	0.811161	0.00235579	0.292205	560.11	33.2887
483991	3	20171221	1	58	172.1	65.6	22.1484	76.8	0.446252	20171221	17.34	1.101	1	1.1	5.27	1.052	1.7	2.6	1259.76	68.8187	0.274335	2.97674	0.44122	5.48148	0.605829	0.0143718	0.464546	122.348	4.86711	0.646694	0.0155579	0.493333	121.862	21.912	0.610827	0.00433044	0.322184	468.208	19.4505	0.651433	0.00461496	0.422526	327.727	37.0725	0.781318	0.00214124	0.282536	1271.33	31.3386
180150906	0	43810	2	57	160.3	41.9	16.306	71.61	0.446725	43810	7.04	0.632	-2.9	-1.2	2.32	0.508	-2.8	-1.4	1191.23	140.097	1.13657	3.89331	1.33402	1.15021	0.972787	0.0284325	0.699028	79.0336	1.97873	0.951381	0.0241682	0.650228	76.5253	4.26523	0.975394	0.0133029	0.559434	303.29	7.58161	0.954412	0.0108014	0.512027	293.352	16.7553	0.9761	0.00918125	0.427314	1189.98	30.1005
557324	3	42485	2	45	164.5	59.9	22.1358	73.51	0.446869	42485	8.06	0.691	-2.4	-0.5	2.91	0.677	-1.2	0.7	1187.67	54.3874	0.952207	4.68359	0.907555	1.76707	0.805777	0.0343427	0.612262	67.9762	2.12256	0.767646	0.0321475	0.582069	67.3433	6.7311	0.812761	0.00939917	0.453912	255.428	8.16707	0.773639	0.00889798	0.591049	469.705	12.6173	0.977278	0.0351755	0.485943	1888.97	20.9194
170165419	3	43615	1	76	165.8	61.7	22.4448	74.13	0.447105	43615	10.24	0.879	-0.5	-0.4	2.68	0.578	-2.4	-1.2	1293.65	158.255	1.16117	4.29767	1.49088	0.933692	0.970529	0.0653583	0.742762	133.918	2.24848	0.926878	0.0568411	0.692849	133.403	3.44504	0.973863	0.0491672	0.612919	521.627	8.83455	0.930752	0.0434241	0.551801	339.522	19.4829	0.975398	0.0186955	0.447282	1348.57	39.3401
190072320		20200708	2	52	167.9	60.5	21.4612	75.1	0.44729	20200708	9.02	0.778	-1.6	-1.2	2.99	0.618	-1.7	-1.2	1229.63	76.846	0.366932	4.8194	0.740054	5.02632	0.70433	0.0142591	0.484844	99.1828	5.69203	0.657025	0.0135894	0.468535	98.8471	19.7191	0.710191	0.00414197	0.348375	377.044	22.2703	0.664499	0.0039629	0.407779	332.287	42.6755	0.770866	0.00211713	0.280318	1288.58	40.4743
130044282		20130329	1	45	176.5	79.8	25.6161	79	0.447592	20130329	15.03	0.932	-0.4	0	4.9	0.852	0	0.7	1220.41	66.0766	0.205525	3.5704	0.671679	3.89662	0.714032	0.0188429	0.530447	92.1729	5.80247	0.577272	0.015302	0.455644	91.4805	14.9934	0.722308	0.00557727	0.381897	349.354	22.453	0.58685	0.00456075	0.315782	346.73	59.4784	0.72385	0.00213056	0.258245	1358.43	89.3495
419858	1.3	20161109	1	47	172.9	60.7	20.3048	77.4	0.447658	20161109	13.78	0.918	-0.6	-0.1	4.21	0.746	-0.8	-0.1	1192.48	58.3788	0.261464	3.26113	0.859612	4.36149	0.595545	0.0195213	0.496974	70.5769	5.85399	0.459761	0.0173426	0.463173	69.792	16.9772	0.602808	0.00568247	0.349842	265.119	22.8659	0.467915	0.00508185	0.324942	261.941	66.989	0.607802	0.00202874	0.232247	1028.36	91.0713
103890	3	20170428	1	56	172.9	71.5	23.9175	77.4	0.447658	20170428	12.93	0.74	-2	-1.1	3.88	0.722	-1	-0.1	1194.98	66.466	0.040559	3.12964	0.857591	7.35108	0.474903	0.013829	0.432009	72.4414	7.38919	0.471597	0.0141017	0.450806	72.018	29.2446	0.476724	0.00391331	0.295096	272.459	28.9682	0.480409	0.00397479	0.310258	271.067	116.499	0.477581	0.00145873	0.192641	1056.36	115.354
160146082	3	43328	2	59	158.2	49.9	19.9383	70.88	0.44804	43304	8.85	0.737	-2	-0.4	2.86	0.655	-1.4	0.2	1277.54	168.747	1.259	4.1914	1.4974	1.14387	0.965889	0.0596979	0.744481	120.429	1.7043	0.948241	0.0517087	0.709026	119.182	4.30837	0.969	0.039616	0.61403	466.906	6.65651	0.951083	0.0336719	0.573579	461.866	17.1504	0.9697	0.03379	0.492741	1839.8	26.7437
510354	3	20180928	1	47	176.9	68.5	21.8895	79.3	0.448276	20180928	13.4	0.81	-1.5	-0.7	3.52	0.739	-0.9	0	1170.11	49.1391	0.258513	3.60172	0.962773	2.34103	0.704952	0.0304539	0.577326	56.3526	3.32721	0.57299	0.0263601	0.529377	56.0362	8.75198	0.719426	0.00832919	0.425215	210.988	12.8768	0.580394	0.0072328	0.389798	220.043	40.2459	0.653699	0.00276144	0.273134	859.64	46.2265
535374	3	20160729	1	80	178.9	71.6	22.3714	80.2	0.448295	20160729	8.8	0.665	-2.7	-1.3	2.76	0.547	-2.4	-1.3	1210.1	50.3588	0.183885	3.44352	0.555808	2.34991	0.710985	0.0295439	0.568284	82.4522	2.19554	0.729039	0.0308203	0.576492	82.2487	8.96402	0.721275	0.00798064	0.413176	311.78	8.28097	0.741437	0.00848281	0.531826	192.58	13.2811	0.742957	0.00545	0.374187	742.742	12.2536
130096450	3	20130712	1	37	178.2	73.8	23.2403	79.9	0.448373	20130712	10.323	0.748	-1.9	0.2	2.83	0.515	-2.7	-0.7	1123.74	61.8402	1.09555	5.51555	0.812945	2.22785	0.81221	0.0277945	0.586751	34.7068	2.70613	0.772633	0.026113	0.565018	34.4165	8.43752	0.820724	0.00755961	0.430735	127.516	10.3766	0.780456	0.00711477	0.346996	422.244	53.5609	0.711151	0.00210881	0.254765	1683.24	75.8212
170048594		20181106	1	68	177.5	81.5	25.8679	79.6	0.448451	20181106	15.42	1.044	0.5	0.8	3.61	0.714	-1.1	0.1	1214.75	75.895	1.2676	8.30691	0.826379	5.62297	0.614141	0.0149196	0.4779	86.2162	5.16532	0.639053	0.015189	0.477562	85.3718	22.2615	0.618825	0.00439554	0.341869	326.051	20.2557	0.646747	0.00446564	0.328459	322.845	88.7757	0.621921	0.00167184	0.228058	1268.64	80.9582
140171831	3	20170629	1	45	172.8	69.6	23.3089	77.5	0.448495	20170629	14.21	0.933	-0.4	0	4.32	0.877	0.2	0.9	1238.49	155.27	1.18587	4.55372	1.47885	1.34699	0.965923	0.0409415	0.69434	104.454	1.60614	0.95845	0.0337319	0.667792	100.438	5.01918	0.969045	0.0261924	0.556668	404.662	6.16842	0.961007	0.0197676	0.327838	271.292	73.0656	0.709698	0.00145152	0.226949	1060.22	76.4571
489683	3	20190527	2	77	162.3	64.6	24.5242	72.9	0.449168	20190527	9.99	0.763	-1.5	0.4	2.72	0.624	-1.8	0.8	1129.42	52.2664	1.06306	4.8497	0.819965	1.86965	0.783461	0.0385377	0.618756	35.6664	1.58047	0.81959	0.0391965	0.632043	36.0633	6.94786	0.795328	0.0108802	0.468507	131.33	5.9037	0.828749	0.0109436	0.475499	132.797	27.1651	0.79957	0.0032922	0.332124	503.41	23.0815
535373	1	20181113	2	75	173.4	70.9	23.5802	77.9	0.44925	20181113	12.58	0.833	-1.3	-0.7	4.25	0.826	-0.2	0.4	1242.86	57.4635	0.772605	6.61918	0.374025	2.95499	0.663625	0.028116	0.550385	106.769	3.92121	0.549383	0.0260537	0.524527	105.87	11.4606	0.673336	0.00798981	0.397063	406.083	15.2621	0.560109	0.00729913	0.360667	113.064	56.0898	0.68307	0.00201027	0.248169	434.904	60.2276
535375	3	20161111	1	72	175.6	68.4	22.1823	78.9	0.449317	20161111	8.52	0.677	-2.3	-0.9	3.17	0.656	-1.5	0.1	1135.1	34.0479	0.822912	5.59101	0.775179	1.19621	0.678501	0.0652697	0.65574	36.2462	1.29421	0.642292	0.0642963	0.647294	35.8834	4.22424	0.705881	0.0183104	0.500115	133.082	4.66387	0.665058	0.0179441	0.415016	394.192	36.4819	0.818317	0.00253951	0.291049	1546.05	41.2609
150069917	3	43600	2	52	161	49.5	19.0965	72.45	0.45	43600	13.21	0.872	-0.8	0	3.43	0.695	-1	-0.2	1262.38	235.925	2.11029	8.28834	1.70963	1.29556	0.972269	0.0473512	0.723591	104.441	3.09629	0.932429	0.0378212	0.671335	102.207	4.919	0.974443	0.0330166	0.588664	405.545	12.3739	0.934412	0.025468	0.541727	396.326	19.5964	0.974959	0.0285032	0.467385	1596.36	50.1144
120073328	3	41106	1	51	166.9	61.5	22.0781	75.14	0.45021	41094	18.1	1.243	2.4	3.4	4.27	0.952	1.4	3.5	1284.49	68.5709	0.273583	3.336	0.369612	3.37461	0.735437	0.0194637	0.533252	145.036	4.0979	0.679695	0.0185798	0.520317	144.402	13.4319	0.742803	0.00605177	0.386823	556.974	16.3512	0.687714	0.0060862	0.538634	167.372	13.1358	0.969512	0.00438625	0.421486	681.302	29.8125
130084815		20161117	1	46	172.8	75.9	25.4188	77.8	0.450231	20161117	14.22	0.944	-0.3	0.1	3.67	0.717	-1	-0.4	1238.07	47.4963	0.0902923	3.182	0.259867	2.12175	0.706589	0.032158	0.587449	103.666	3.08678	0.571201	0.0273386	0.533268	103.019	8.03283	0.718934	0.00888257	0.431133	392.98	11.8705	0.582983	0.00774177	0.38293	390.494	31.7613	0.720661	0.00267984	0.297205	1532.05	47.1205
160168413	1	20200722	1	60	175.9	65	21.0079	79.2	0.450256	20200722	12.34	0.852	-1.1	-0.4	3.49	0.693	-1.2	-0.3	1185.92	61.4433	0.952109	4.40404	0.969691	2.49386	0.788074	0.0263029	0.559527	67.5028	3.17636	0.721097	0.0256354	0.546393	66.1064	9.51749	0.79587	0.00717595	0.407415	254.823	12.305	0.727265	0.00691291	0.391561	249.225	37.655	0.798569	0.00218919	0.283822	988.14	48.9314
111582	3	43410	1	51	167.9	64.2	22.7737	75.65	0.450566	43410	16.98	1.01	0.2	0.5	4.55	0.821	-0.2	0.4	1204.79	66.463	0.329402	4.09638	0.797741	4.46485	0.66548	0.0171889	0.491516	80.0954	7.14574	0.464505	0.0142718	0.440163	77.9228	17.4971	0.670904	0.00511621	0.342859	302.471	28.1652	0.470295	0.00423843	0.541476	355.744	18.8762	0.971462	0.00788551	0.402668	1424.57	20.8148
111356	3	20180402	1	69	168	65.7	23.2781	75.7	0.450595	20180402	10.65	0.798	-1.5	0.1	3.75	0.723	-0.7	0.8	1175.27	144.679	2.27662	8.76008	1.27139	1.27091	0.960992	0.0405546	0.69988	62.5739	1.71059	0.946734	0.0393277	0.698497	62.3824	4.83939	0.963772	0.0149855	0.547399	239.376	6.67857	0.949178	0.0146828	0.419921	310.925	35.3201	0.724047	0.00241944	0.286584	1211.82	32.6203
216920	3	20170929	2	45	165	66.9	24.573	74.4	0.450909	20170929	12.46	0.901	-0.6	-0.3	3.17	0.662	-1.3	-0.8	1215.24	48.5762	0.000669452	3.22632	0.504798	1.93929	0.74829	0.0322945	0.595605	86.7357	2.51342	0.665562	0.0293682	0.562443	86.2171	7.11964	0.763838	0.00891865	0.443864	327.707	9.34109	0.681981	0.00818645	0.417938	325.682	28	0.766356	0.00268707	0.308683	1273.63	36.6452
468436	3	20160513	1	48	171.2	58.7	20.0277	77.3	0.451519	20160513	18.69	1.14	1.3	1.4	4.82	0.926	0.6	1.3	1294.92	65.488	0.58705	4.37078	0.314161	3.19877	0.702078	0.0223287	0.549499	152.067	3.77815	0.645021	0.0211802	0.52923	151.652	12.5946	0.710446	0.00687818	0.401142	583.977	14.6898	0.65924	0.00644859	0.386217	582.465	50.0392	0.71314	0.00276507	0.275961	2289.92	58.6745
451981	3	42647	2	80	143.1	41.1	20.0707	64.67	0.451922	42626	6.35	0.571	-3.2	-0.8	2.07	0.432	-4	-0.9	1172.67	184.849	1.40147	4.66526	1.37495	1.93492	0.9662	0.0535534	0.7053	71.7841	3.34411	0.940853	0.0503869	0.685262	71.0954	7.59577	0.9679	0.0321805	0.581027	277.71	13.4205	0.942579	0.0296795	0.561096	275.059	30.4884	0.968332	0.0252653	0.468533	1092.29	54.2163
130180586	3	20151106	2	36	166.4	62	22.3916	75.2	0.451923	20151106	10.92	0.849	-1	-0.9	3.3	0.685	-1.1	-0.7	1221	67.4558	0.479162	4.50677	0.723062	2.7876	0.78965	0.0203735	0.554946	92.5473	3.30435	0.753072	0.0188141	0.53144	91.6449	10.5318	0.799283	0.00570345	0.402566	351.168	12.6139	0.761806	0.00525046	0.383946	347.519	41.8227	0.801004	0.00185325	0.277052	1367.84	49.9601
160108923	3	43683	2	51	152.3	51.1	22.0303	68.85	0.452068	43683	14.36	0.967	-0.1	0.3	4.61	0.83	-0.01	0.8	1259.3	57.5578	0.626962	3.36089	0.210008	2	0.798561	0.0280033	0.600047	121.888	2.84148	0.708084	0.0249225	0.562293	119.981	7.41237	0.812622	0.00796771	0.447762	466.166	10.7483	0.722647	0.00706547	0.530422	240.095	21.3805	0.958468	0.00637642	0.39249	968.284	29.6989
150048640	3	20180604	1	52	178	72	22.7244	80.5	0.452247	20180604	9.83	0.712	-2.3	-1.8	3.73	0.703	-1.2	-0.8	1289.82	156.639	0.940769	3.47032	1.51845	0.801781	0.976522	0.0755958	0.76877	133.068	1.78672	0.947246	0.0653671	0.718946	132.155	2.90128	0.97957	0.0583288	0.644789	518.21	7.08125	0.949669	0.0500464	0.325753	152.199	79.1978	0.581864	0.00166625	0.220596	585.576	87.479
434781	3	42895	1	63	167.8	66.4	23.5822	75.94	0.452563	42894	11.89	0.836	-1.2	0.7	3.26	0.683	-1.1	1	1139.88	80.9534	0.830037	3.8224	0.951537	3.63562	0.819923	0.0173131	0.525536	45.5768	3.84439	0.812922	0.0161741	0.506534	46.516	14.5507	0.820375	0.00515694	0.371236	169.875	15.1769	0.815974	0.00482614	0.67144	611.989	18.3192	0.975352	0.102921	0.566061	2444.09	11.04
557324	3	43629	2	48	164.5	59.9	22.1358	74.47	0.452705	43629	11.38	0.736	-2.1	-1.1	3.61	0.673	-1.4	-0.4	1159.72	51.6498	0.169137	4.27613	1.00697	3.58629	0.579864	0.0241975	0.517819	50.058	3.11111	0.632979	0.0255264	0.539292	49.8208	13.8274	0.587612	0.00663352	0.367868	186.479	11.8375	0.644311	0.0069976	0.587735	481.495	16.6359	0.976106	0.0535836	0.50751	1938.08	37.4861
170176314	3	43537	1	62	177.6	68.1	21.5904	80.45	0.452984	43537	13.62	0.884	-0.8	-0.3	4.21	0.708	-1.1	-0.3	1215.21	59.2588	0.0963603	3.60727	0.623613	3.33254	0.699252	0.0211892	0.518263	87.5437	3.84443	0.659982	0.0207131	0.513865	86.4403	12.7254	0.710695	0.00606324	0.371036	331.923	14.8829	0.668789	0.00581283	0.503988	347.608	19.9877	0.965486	0.00981546	0.404868	1367.54	34.0238
464817	3	43630	2	43	154.5	51	21.3655	70.17	0.454175	43630	10.24	0.879	-0.5	-0.4	2.68	0.578	-2.4	-1.2	1293.65	158.255	1.16117	4.29767	1.49088	0.933692	0.970529	0.0653583	0.742762	133.918	2.24848	0.926878	0.0568411	0.692849	133.403	3.44504	0.973863	0.0491672	0.612919	521.627	8.83455	0.930752	0.0434241	0.565257	519.513	13.5968	0.974718	0.0438058	0.494076	2058.64	35.6297
130101235	3	20170714	2	43	164.9	62.2	22.8744	74.9	0.454215	20170714	14.89	1.099	1.1	1.2	4.22	0.809	0.1	0.5	1159.38	74.7678	0.802807	4.90447	1.0503	5.45677	0.674611	0.0146599	0.467434	53.0025	4.93338	0.703279	0.0154005	0.476372	53.0572	21.4079	0.681351	0.00421715	0.332827	198.402	19.2256	0.711189	0.00436182	0.430558	646.146	48.7561	0.762631	0.00848808	0.30995	2549.55	45.4935
130033141	3	20190311	1	60	169.6	65.4	22.7366	77.1	0.454599	20190311	16.67	1.092	0.9	1.1	4.73	0.827	-0.2	0.5	1294.72	70.1146	0.307898	3.40752	0.430623	5.06255	0.593206	0.0186467	0.499839	151.421	5.51393	0.54959	0.017422	0.473245	149.895	19.8008	0.608181	0.00684486	0.361935	582.724	22.0441	0.555812	0.00568514	0.3679	236.138	65.0454	0.690602	0.00160351	0.236066	911.897	56.049
150065076	3	20190531	1	49	176	68.1	21.9848	80.1	0.455114	20190531	13.19	0.902	-0.7	-0.1	3.54	0.717	-1	-0.1	1248.18	203.625	1.88644	6.93535	1.63885	1.30408	0.968748	0.0402499	0.709847	98.6153	1.95924	0.952789	0.0360191	0.698473	97.4737	4.91531	0.971311	0.0264827	0.575616	381.52	7.72601	0.954646	0.0228891	0.342788	257.928	90.6154	0.521232	0.00165187	0.211894	996.296	78.659
180050886	3	20190422	2	74	168.5	70.2	24.7251	76.7	0.455193	20190422	6.41	0.6	-3	-0.7	2.87	0.624	-1.8	0.7	1134.13	59.5696	0.611026	3.49276	0.892293	2.33556	0.794757	0.0260519	0.571474	39.18	2.99443	0.729966	0.0235611	0.540103	38.1444	8.93333	0.802	0.00710741	0.41262	144.499	11.6031	0.735679	0.00649197	0.383039	140.371	35.6417	0.802627	0.00222654	0.279451	554.212	46.0569
150157447	3	20191106	1	46	174.2	73.8	24.3198	79.3	0.455224	20191106	17.1	1.15	1.4	1.5	4.66	0.835	-0.1	0.6	1268.83	73.3863	0.912244	6.48224	0.453964	3.15269	0.760819	0.0207629	0.546016	129.298	4.65957	0.636041	0.0180644	0.510863	128.54	12.2774	0.770012	0.00645658	0.398251	494.829	18.4478	0.644452	0.00540782	0.367444	491.666	48.793	0.772437	0.00253012	0.277647	1936.83	73.2922
503884	3	20200724	2	47	164.2	60.3	22.3651	74.8	0.455542	20200724	9.42	0.591	-3.3	-1.4	3.09	0.517	-2.7	-1.3	1240.31	75.6726	1.88728	10.9628	0.58963	2.50206	0.799839	0.0233513	0.568335	103.87	2.7448	0.780385	0.0227918	0.562167	103.44	9.33695	0.813566	0.00676492	0.418711	396.044	10.4376	0.79158	0.00671299	0.41987	509.389	22.377	0.823338	0.0032605	0.337879	2017.42	36.1179
368763		20181018	1	72	180.9	75.8	23.1629	82.5	0.456053	20181018	10.12	0.712	-2.3	-1.2	3.88	0.785	-0.5	0.4	1128.8	54.2653	0.185781	3.21558	0.875497	3.59928	0.612755	0.022537	0.522863	35.0556	3.75556	0.592099	0.0225526	0.514308	34.4871	13.8941	0.622749	0.00615041	0.373795	128.856	14.3898	0.605384	0.00616581	0.352962	154.166	48.5751	0.68465	0.00202226	0.255678	599.836	64.2901
233792		20190909	1	62	177.8	80.8	25.5592	81.2	0.456693	20190909	20.8	1.162	1.5	1.5	3.89	0.758	-0.7	0.3	1253.95	97.3964	1.62177	8.34703	0.836674	3.5959	0.801161	0.0179473	0.533105	114.15	4.00611	0.779908	0.017566	0.52551	113.867	14.143	0.808186	0.00720252	0.393339	438.151	15.4422	0.791989	0.00742654	0.38758	437.267	56.7034	0.80988	0.00392083	0.277637	1713.08	61.8061
160025802	3	20180314	2	60	168.2	66.7	23.5762	76.9	0.457194	20180314	10.67	0.922	-0.4	-0.2	2.57	0.603	-1.9	-1.4	1303.6	176.783	0.936721	3.09472	1.6273	0.790082	0.978018	0.0935885	0.777276	134.268	1.97872	0.944446	0.0865172	0.739552	134.762	2.83356	0.981039	0.0718521	0.657736	522.838	7.91833	0.946417	0.0666411	0.406643	206.226	28.7415	0.83052	0.00219073	0.301318	803.674	35.0646
120129913	3	20151022	1	46	178.4	74.3	23.3453	81.6	0.457399	20151022	20.8	1.162	1.5	1.5	3.89	0.758	-0.7	0.3	1253.95	97.3964	1.62177	8.34703	0.836674	3.5959	0.801161	0.0179473	0.533105	114.15	4.00611	0.779908	0.017566	0.52551	113.867	14.143	0.808186	0.00720252	0.393339	438.151	15.4422	0.791989	0.00742654	0.357621	213.338	62.585	0.598997	0.00184043	0.235543	830.937	67.9845
150062134	3	20190527	1	57	172.3	71.1	23.9496	78.9	0.457922	20190527	20.04	1.203	1.8	1.8	5.51	1.052	1.7	2.6	1301.59	75.0274	0.159483	3.07907	0.530508	5.49675	0.601859	0.0215888	0.496218	157.44	4.82614	0.649464	0.0218822	0.503129	157.531	22.2773	0.60705	0.00842807	0.36055	608.28	19.2549	0.659651	0.00842411	0.358638	608.787	90.2552	0.608694	0.0046787	0.25288	2388.27	77.5222
303185	3	43872	2	63	160.7	53.4	20.678	73.6	0.457996	43872	8.4	0.606	-3.2	-1.1	2.6	0.563	-2.2	-0.5	1220.57	172.643	0.859385	3.2022	1.5088	1.45845	0.970699	0.0452719	0.718491	97.6461	3.57173	0.928244	0.0368376	0.657587	95.2148	5.63296	0.972703	0.0323758	0.590564	378.629	14.4165	0.930126	0.0254259	0.529802	368.821	22.4307	0.973319	0.027227	0.474723	1491.5	58.3562
325707	3	20190610	1	60	176.2	64.1	20.6465	80.7	0.458002	20190610	13.22	0.833	-1.3	-0.5	4.54	0.88	0.3	1.2	1188.5	57.388	0.69808	4.63701	0.901567	2.97143	0.714059	0.024391	0.539565	68.3308	3.0211	0.700495	0.0253326	0.545811	67.2999	11.16	0.726571	0.00679466	0.392344	257.759	11.4169	0.711286	0.00705205	0.390136	253.629	44.633	0.726011	0.00217002	0.262775	998.46	45.2494
130180667		20141119	1	49	181.4	76.6	23.2785	83.1	0.458104	20141119	6.99	0.636	-2.9	-1.2	2.49	0.516	-2.7	-1.4	1205.27	54.9853	0.394247	3.42999	0.679105	1.63647	0.828989	0.0337231	0.619696	80.09	1.70091	0.821828	0.0328966	0.615451	80.1556	6.07005	0.839739	0.00918414	0.463877	302.602	6.24802	0.834751	0.00907493	0.306981	253.129	83.5199	0.637218	0.00160409	0.220479	996.486	109.719
410827	3	42746	2	36	169.3	66.3	23.1313	77.57	0.458181	42727	11.84	0.844	-1.1	0	3.25	0.743	-0.6	0.5	1350.21	185.311	1.05233	3.71756	1.55971	0.690427	0.974054	0.109315	0.789096	158.685	1.26772	0.951493	0.0941149	0.74024	156.659	2.52862	0.977542	0.0897538	0.672243	619.518	4.9381	0.955086	0.0766222	0.590489	495.669	13.7502	0.972655	0.0331476	0.4876	1959.17	29.8629
160146082	3	43594	2	60	158.2	49.9	19.9383	72.57	0.458723	43594	9.25	0.709	-2.3	-0.5	3.13	0.673	-1.2	0.4	1278.47	177.104	0.968394	3.43809	1.57411	1.1629	0.969832	0.0637322	0.750965	121.658	2.11694	0.943323	0.0530186	0.695952	119.272	4.31075	0.973253	0.0465707	0.621644	472.374	8.3224	0.94649	0.0387178	0.57045	462.721	17.0624	0.974041	0.0423245	0.506736	1862.15	33.4109
150069302	3	20150527	1	42	172.1	61.4	20.7303	79	0.459035	20150527	12.2	0.801	-1.5	-1	3.58	0.707	-1.1	-0.6	1199.53	50.7257	0.458321	3.77781	0.716683	2.30547	0.722791	0.0301426	0.571454	75.0613	2.77337	0.656867	0.0286949	0.555767	74.093	8.6844	0.733673	0.00814489	0.412747	283.232	10.6301	0.664711	0.00776138	0.399926	279.452	34.2467	0.736419	0.00244208	0.283049	1098.83	41.9477
130176341		20191108	2	48	166.8	59.6	21.4217	76.6	0.459233	20191108	10.54	0.748	-1.9	-1.2	2.59	0.548	-2.4	-1.8	1185.79	51.706	1.50394	6.96316	0.902653	1.33112	0.839815	0.0479244	0.652252	66.6932	1.30599	0.83721	0.0486244	0.656125	65.8271	4.80731	0.855001	0.0132388	0.497964	250.674	4.79435	0.850192	0.0134052	0.498453	247.193	18.8942	0.857458	0.00373432	0.347988	972.741	18.5272
170165422	1	20171205	2	67	162.8	65.1	24.5625	74.8	0.459459	20171205	11.08	0.869	-0.9	0.9	2.94	0.737	-0.6	1.6	1215.35	84.6034	0.504648	3.52311	0.94069	2.7575	0.867361	0.0178312	0.563454	91.7875	3.80613	0.813216	0.016313	0.532097	91.1382	10.5569	0.874306	0.00540391	0.411215	349.136	14.9112	0.818748	0.0049073	0.376841	346.422	41.8813	0.876118	0.00207891	0.283632	1360.5	59.5403
120167483	3	20150806	2	65	166.5	67.2	24.2405	76.5	0.459459	20150806	8.05	0.694	-2.4	-0.4	3.79	0.84	0.3	2.5	1166.08	66.9063	-0.00264673	2.8121	0.988774	3.76959	0.734313	0.01708	0.520853	56.9568	5.38889	0.622857	0.014437	0.474312	55.811	14.5885	0.741976	0.00491417	0.368684	213.35	21.2392	0.627132	0.00409993	0.327368	208.819	57.6845	0.743638	0.00169467	0.24588	823.189	84.3936
190665		20170209	1	55	182.7	85.2	25.5248	84	0.45977	20170209	2.54	0.56	-2.6	0.5	3.77	0.773	-0.6	0.3	1174.96	64.6361	0.424207	4.67132	1.00433	4.74609	0.630316	0.0177881	0.494052	60.5227	4.85366	0.618909	0.0172232	0.489223	60.343	18.2695	0.641958	0.00514038	0.351668	226.72	18.8914	0.627047	0.00510882	0.345271	225.917	72.2398	0.645307	0.00188477	0.233971	875.809	75.166
160010901	3	20170201	2	66	167.9	62.2	22.0642	77.2	0.459797	20170201	9.66	0.714	-2.3	-1.9	3.41	0.684	-1.3	-1	1163.26	92.4124	0.989498	5.14627	1.1006	6.73065	0.707111	0.0113679	0.453613	56.0495	6.33836	0.72707	0.0116263	0.468514	56.8628	26.4319	0.715165	0.00333933	0.31991	210.934	25.0535	0.732554	0.00339783	0.392623	117.408	31.1208	0.813979	0.00233816	0.298771	459.077	44.4169
269038	3	20170321	2	40	166.1	63.2	22.9075	76.4	0.459964	20170321	11.26	0.88	-0.8	-0.5	2.86	0.646	-1.5	-1	1287.94	206.105	1.72859	6.31079	1.68086	1.15948	0.969081	0.0617429	0.725447	119.925	1.98077	0.946363	0.0492554	0.685517	116.931	4.34052	0.972084	0.0474826	0.595496	466.565	7.8435	0.948634	0.0355399	0.456752	513.13	25.3331	0.859951	0.00290686	0.316565	2009.67	26.3719
130178145	3	20160905	1	51	171.1	67.3	22.9887	78.7	0.459965	20160905	14.49	0.938	-0.4	-0.2	3.9	0.776	-0.6	-0.2	1230.37	78.0284	0.581781	4.21847	0.771206	5.5	0.678556	0.0135495	0.477769	99.0849	6.64983	0.608815	0.0126232	0.451983	97.7017	21.768	0.682164	0.00407236	0.334586	378.003	26.3158	0.613193	0.00375789	0.388016	175.343	45.4772	0.682741	0.00204344	0.259476	674.601	43.825
533399	3	20170124	2	53	157.1	61.6	24.9591	72.3	0.460216	20170124	8.24	0.741	-2	-0.7	2.67	0.545	-2.4	-1.4	1179.1	49.4222	0.234072	3.87965	0.919849	1.68197	0.782616	0.0341036	0.608966	62.093	2.56343	0.668744	0.0281685	0.552754	61.2794	6.30442	0.79373	0.00922005	0.449505	233.108	9.69543	0.682398	0.00765257	0.396734	230.001	24.6712	0.797668	0.00278176	0.316179	901.472	38.6057
150069991		20170608	2	49	163.8	64.5	24.0399	75.5	0.460928	20170608	11.19	0.875	-0.8	-0.2	3.81	0.777	-0.2	0.3	1177.98	55.0821	0.416054	3.3429	0.948155	1.7714	0.818358	0.0303819	0.603835	62.0841	2.14038	0.77898	0.0282246	0.580903	61.7932	6.50371	0.830343	0.00833235	0.442917	232.502	8.07391	0.787907	0.00771802	0.425209	231.302	25.5443	0.833485	0.00242897	0.303627	900.004	31.7946
453313	3	42529	1	47	174.3	77.4	25.4769	80.34	0.460929	42529	15	0.984	0	0.4	4.49	0.828	-0.1	0.5	1281.63	152.93	1.1342	4.41758	1.48097	1.55385	0.952222	0.049778	0.698433	129.652	2.99369	0.906729	0.0401213	0.660467	128.291	5.91933	0.955883	0.0338742	0.567327	503.497	11.83	0.910617	0.0261531	0.530448	497.766	23.5784	0.956772	0.0289468	0.450288	1983	47.6625
499677	3	20190415	1	50	177.4	77.5	24.626	81.8	0.461105	20190415	14.68	0.957	-0.2	0.2	4.03	0.756	-0.7	0	1221.58	58.7068	0.654276	4.56565	0.579019	3.5289	0.658636	0.0226872	0.521505	90.9229	4.49599	0.557208	0.0210713	0.492089	89.7426	13.5914	0.670257	0.00632002	0.36981	344.823	17.6671	0.563116	0.00576135	0.34653	340.112	54.012	0.673438	0.00205781	0.249758	1344.33	70.6237
130031431	3	20150601	2	53	169	66.1	23.1434	78	0.461538	20150601	15.42	1.044	0.5	0.8	3.61	0.714	-1.1	0.1	1214.75	75.895	1.2676	8.30691	0.826379	5.62297	0.614141	0.0149196	0.4779	86.2162	5.16532	0.639053	0.015189	0.477562	85.3718	22.2615	0.618825	0.00439554	0.341869	326.051	20.2557	0.646747	0.00446564	0.424366	345.811	32.9436	0.756817	0.00266403	0.2927	1348.98	38.0646
111322	3	20170103	2	53	163.7	64.9	24.2185	75.6	0.46182	20170103	8.88	0.738	-2	-0.9	3.07	0.762	-0.4	0.5	1236.22	52.4882	0.352915	3.50067	0.330115	1.61849	0.813992	0.0330938	0.618023	102.596	2.83444	0.661907	0.0270686	0.555244	100.729	6.13511	0.822817	0.00892926	0.460352	390.66	10.8904	0.673093	0.00728469	0.403977	383.272	24.0869	0.82552	0.00271152	0.317686	1522.92	43.3882
120034590	3	20151021	1	57	171.6	69.5	23.6021	79.3	0.462121	20151021	11.08	0.924	-0.4	0.7	3.1	0.655	-1.4	-0.2	1226.28	138.562	1.30455	4.41627	1.44958	1.1014	0.96844	0.0385104	0.718894	95.1098	1.48571	0.955598	0.0348745	0.697359	92.8464	4.04825	0.97178	0.020581	0.581991	367.008	5.63929	0.958732	0.0168296	0.337623	313.924	70.2674	0.659816	0.00169428	0.234362	1217.43	73.876
130182636	3	20181210	1	58	177.6	62.5	19.815	82.1	0.462275	20181210	14.99	1.005	0.2	0.5	5.06	0.869	0.2	1.1	1200.16	71.1155	1.09045	9.08325	0.869717	4.42439	0.68431	0.017651	0.497264	76.403	5.07937	0.636706	0.0171917	0.487814	76.5012	16.9866	0.693126	0.00502528	0.353758	288.499	19.8486	0.641025	0.00487431	0.339963	288.814	67.5043	0.694661	0.0017854	0.23681	1118.9	78.5385
546488		20190118	2	62	164.8	67.7	24.9272	76.2	0.462379	20190118	16.54	1.008	0.2	0.5	4.38	0.88	0.3	0.9	1180.42	51.1836	0.875728	8.14256	0.915947	2.14003	0.729178	0.0316488	0.581055	62.5518	1.92972	0.757092	0.0330558	0.589926	62.7608	8.11381	0.740766	0.00854341	0.424058	234.981	7.23598	0.769676	0.00897614	0.438595	235.758	31.9827	0.743488	0.0027039	0.293157	908.926	28.314
130169604		20190326	2	54	162	58	22.1003	75	0.462963	20190326	14.46	0.914	-0.6	0	3.88	0.754	-0.7	0.2	1177.72	57.0819	0.634815	4.49323	0.972575	2.53994	0.753394	0.0247188	0.554543	62.0799	3.31814	0.664556	0.0224155	0.521894	60.9975	9.67796	0.763306	0.00665153	0.402656	232.481	12.8678	0.671981	0.00610212	0.447236	193.348	26.1282	0.789873	0.00309251	0.320943	744.308	30.095
130173302		20161109	1	45	181.6	84.7	25.6834	84.1	0.463106	20161109	13.67	0.897	-0.9	-0.4	4.8	0.78	-0.5	0.1	1196.23	61.4085	0.706668	4.75494	0.882656	3.91463	0.653975	0.0200342	0.514785	73.1775	3.79116	0.660022	0.0202138	0.508596	72.5728	15.0874	0.664946	0.00565232	0.380538	275.73	14.6469	0.669965	0.00563469	0.363681	273.31	59.628	0.669171	0.0020417	0.259351	1070.37	58.0612
348998	3	41214	1	54	167.4	63	22.4817	77.54	0.463202	41201	6.41	0.6	-3	-0.7	2.87	0.624	-1.8	0.7	1134.13	59.5696	0.611026	3.49276	0.892293	2.33556	0.794757	0.0260519	0.571474	39.18	2.99443	0.729966	0.0235611	0.540103	38.1444	8.93333	0.802	0.00710741	0.41262	144.499	11.6031	0.735679	0.00649197	0.545928	309.471	12.0321	0.982707	0.0194276	0.471366	1278.87	37.3076
535397	3	20161123	1	72	171.7	56.3	19.0971	79.6	0.463599	20161123	8.1	0.673	-2.3	-0.3	2.39	0.501	-2.8	-0.8	1142.01	65.8307	0.241063	2.92613	0.970832	3.94324	0.710698	0.0167265	0.510704	43.3204	4.18763	0.690029	0.0162463	0.48937	43.1143	15.2162	0.720014	0.00471745	0.363775	160.401	16.4054	0.695401	0.00459671	0.347648	159.484	60.6001	0.720733	0.00159538	0.24257	617.491	65.3903
190104243		20200805	1	53	175.4	78.4	25.4834	81.4	0.464082	20200805	20.49	1.166	1.5	1.6	4.99	0.868	0.2	1	1276.68	78.2633	0.168096	4.12608	0.527308	5.42573	0.665127	0.0150952	0.484376	135.935	6.32609	0.601984	0.0142916	0.462759	135.931	21.2222	0.673985	0.004809	0.34816	521.101	24.9512	0.609632	0.00458367	0.327817	521.064	84.8082	0.676017	0.00226394	0.237848	2041.06	99.6322
150135553	3	20151021	1	39	169.9	64.3	22.2753	79	0.464979	20151021	13.78	0.918	-0.6	-0.1	4.21	0.746	-0.8	-0.1	1192.48	58.3788	0.261464	3.26113	0.859612	4.36149	0.595545	0.0195213	0.496974	70.5769	5.85399	0.459761	0.0173426	0.463173	69.792	16.9772	0.602808	0.00568247	0.349842	265.119	22.8659	0.467915	0.00508185	0.353365	467.896	54.8905	0.681511	0.00189646	0.245318	1840.53	65.9993
397726	3	20190605	1	50	173.1	71.3	23.7955	80.5	0.465049	20190605	13.5	0.866	-1	-0.4	4.52	0.79	-0.5	0.3	1190.41	61.1087	0.775827	5.95542	0.909936	3.74411	0.66449	0.0209095	0.522891	69.6216	4.83333	0.568009	0.0184629	0.481662	68.6956	14.1547	0.675343	0.00587774	0.372092	261.45	18.6748	0.573671	0.00526192	0.340244	257.718	55.6515	0.679858	0.00196057	0.248656	1014.57	74.1128
140162714	3	20191203	2	36	162.5	60.3	22.8355	75.6	0.465231	20191203	10.23	0.698	-2.4	-1.4	3.61	0.705	-1.1	-0.3	1173.52	42.5749	1.1399	7.57893	0.937193	0.957792	0.833114	0.0710137	0.695476	57.9558	1.16928	0.777566	0.0723354	0.690987	57.1948	3.3461	0.853199	0.0201754	0.536438	217.017	4.18497	0.799875	0.0202913	0.46082	742.95	27.0776	0.826764	0.0282604	0.406226	2941.58	45.8659
557327	3	42867	1	37	168.7	63.4	22.2771	78.53	0.465501	42867	12.93	0.74	-2	-1.1	3.88	0.722	-1	-0.1	1194.98	66.466	0.040559	3.12964	0.857591	7.35108	0.474903	0.013829	0.432009	72.4414	7.38919	0.471597	0.0141017	0.450806	72.018	29.2446	0.476724	0.00391331	0.295096	272.459	28.9682	0.480409	0.00397479	0.596041	514.47	11.3422	0.98038	0.0519159	0.525841	2046.18	28.4094
245762	3	20190805	2	67	166.6	59.2	21.3291	77.6	0.465786	20190805	8.67	0.667	-2.6	-0.5	3.18	0.706	-0.9	1.2	1100.16	67.9871	0.564407	3.84743	0.706181	3.3335	0.74891	0.0235144	0.552814	26.1895	4.44097	0.6592	0.0194609	0.501571	25.3299	12.906	0.760166	0.00737114	0.401187	95.5458	17.4985	0.668737	0.00573094	0.351951	92.0665	51.5334	0.762535	0.00309932	0.278243	364.035	70.0675
391470	3	43236	2	58	172.5	63.8	21.4409	80.41	0.466145	43236	13.02	0.832	-1.3	-0.5	2.95	0.592	-2	-1.1	1151.86	62.7344	0.969629	8.24918	1.01803	3.33873	0.712097	0.0208098	0.525865	47.4221	4.54154	0.616766	0.018156	0.487472	47.1743	12.8574	0.72072	0.00575849	0.375105	176.173	17.7503	0.622762	0.00508536	0.56493	347.385	16.4756	0.978914	0.0204753	0.456899	1395.64	31.7867
462765		20160310	2	61	163.4	57.1	21.3861	76.2	0.46634	20160310	9.36	0.695	-2.4	-0.5	3.05	0.552	-2.3	-0.7	1136.72	50.9039	0.846802	8.50683	0.925873	1.97423	0.74101	0.0343545	0.5943	38.6788	2.62816	0.657815	0.0295338	0.549164	38.6768	7.44249	0.75369	0.00942171	0.441601	142.609	10.0644	0.669332	0.00811381	0.399347	142.575	29.1873	0.75707	0.00285903	0.305133	546.82	39.5429
160025802		20180314	2	60	162.1	67.1	25.5362	75.6	0.466379	20180314	10.35	0.837	-1.1	0.4	2.92	0.611	-1.8	-0.2	1165.89	57.5562	0.438709	3.13634	0.998515	1.91038	0.822581	0.0273006	0.59353	55.6722	2.31719	0.784387	0.0248898	0.560114	55.2407	7.28868	0.828754	0.00740922	0.434781	207.958	8.89934	0.790343	0.00676627	0.406643	206.226	28.7415	0.83052	0.00219073	0.301318	803.674	35.0646
130180586		20151106	2	36	164	59.9	22.271	76.5	0.466463	20151106	7.04	0.632	-2.9	-1.2	2.32	0.508	-2.8	-1.4	1191.23	140.097	1.13657	3.89331	1.33402	1.15021	0.972787	0.0284325	0.699028	79.0336	1.97873	0.951381	0.0241682	0.650228	76.5253	4.26523	0.975394	0.0133029	0.559434	303.29	7.58161	0.954412	0.0108014	0.383946	347.519	41.8227	0.801004	0.00185325	0.277052	1367.84	49.9601
130172581	3	20171024	1	55	170.8	68.9	23.618	79.8	0.467213	20171024	4.56	0.48	-4.2	-1.3	1.67	0.434	-3.4	-1.2	1098.53	50.9362	0.544165	4.14984	0.53148	1.50872	0.814625	0.0368052	0.634387	23.4658	1.94868	0.76083	0.0335308	0.604851	23.1107	5.45785	0.83025	0.0104491	0.484723	84.3503	7.50293	0.767297	0.00926742	0.412213	133.9	32.4838	0.685459	0.00282902	0.284494	517.691	38.4232
402841	3	20190909	1	77	174.8	65.4	21.404	81.7	0.467391	20190909	11.66	0.797	-1.6	-0.3	4.307	0.77	-0.6	0.8	1229.41	120.12	0.880832	4.22394	1.24964	7.08655	0.76798	0.0143855	0.479787	98.5185	8.05238	0.736255	0.0138461	0.452703	96.8817	28.3643	0.773455	0.00744379	0.349925	377.966	32.1683	0.742873	0.00749433	0.331504	371.379	114.116	0.774611	0.00567461	0.250359	1479.03	128.198
120031137	3	20130626	1	45	174.2	71.2	23.463	81.5	0.467853	20130626	15.1	1	0.1	0.5	3.74	0.705	-1.1	-0.2	1238.23	88.7636	2.83372	19.6843	0.692022	4.68006	0.654831	0.0172471	0.497269	99.9948	4.97599	0.628835	0.0170528	0.48331	99.8147	18.4576	0.661533	0.00515187	0.356606	381.114	19.7382	0.633766	0.00501157	0.335125	576.117	79.1568	0.612478	0.00370239	0.254051	2286.88	88.1385
140145087	3	20171025	1	63	176	74.8	24.1477	82.4	0.468182	20171025	15.18	0.925	-0.5	0.1	4.67	0.833	-0.1	0.9	1207.37	63.5868	0.154981	3.67094	0.75966	4.68906	0.626693	0.0173866	0.490283	81.5911	4.42909	0.649455	0.0176874	0.492998	81.5055	18.2224	0.632639	0.00482096	0.343207	308.072	17.0178	0.659192	0.00486182	0.34638	307.987	72.2083	0.634943	0.00162218	0.230878	1197.15	67.7802
502947	3	20161216	1	45	171.5	70.1	23.8336	80.3	0.468222	20161216	16.98	1.01	0.2	0.5	4.55	0.821	-0.2	0.4	1204.79	66.463	0.329402	4.09638	0.797741	4.46485	0.66548	0.0171889	0.491516	80.0954	7.14574	0.464505	0.0142718	0.440163	77.9228	17.4971	0.670904	0.00511621	0.342859	302.471	28.1652	0.470295	0.00423843	0.30514	293.887	69.4878	0.673151	0.00184126	0.231373	1175.89	111.561
336885	3	20151207	1	51	175.5	64.3	20.8765	82.2	0.468376	20151207	18.65	1.098	0.9	1.1	3.88	0.74	-0.9	-0.1	1206.88	55.0562	-0.0250066	4.00959	0.650505	2.84659	0.701461	0.0254881	0.538136	80.3443	3.3396	0.650429	0.0241332	0.509198	80.0387	11.0506	0.709331	0.00699122	0.385485	303.825	12.9932	0.658829	0.00659962	0.363582	302.573	43.892	0.711326	0.00220558	0.260713	1180.51	51.6621
150146490	3	20191122	1	48	174.6	73.5	24.1101	81.8	0.468499	20191122	12.49	0.834	-1.3	-0.6	3.72	0.727	-1	-0.3	1197.6	54.398	0.901693	6.32745	0.785868	3.24745	0.631035	0.0250625	0.526078	73.4919	3.45471	0.614476	0.0246731	0.528364	73.471	12.4078	0.640982	0.00697815	0.380814	276.387	13.18	0.625228	0.00682557	0.37641	276.368	49.0967	0.644214	0.00217479	0.256303	1070.88	51.994
160080494	3	43458	1	58	175.8	73.7	23.8468	82.44	0.468942	43458	13.96	0.881	-0.9	-0.2	4.59	0.857	0.1	1	1218.91	152.269	1.46687	5.50393	1.45561	1.53162	0.958853	0.0318109	0.699436	90.2555	2.24452	0.939139	0.0282601	0.668554	89.466	5.88934	0.961513	0.0168531	0.55788	347.192	8.78447	0.942057	0.0143975	0.524335	344.044	23.3243	0.962392	0.0126354	0.426634	1362.02	35.2482
451981	3	42884	2	81	143.1	41.1	20.0707	67.12	0.469043	42870	6.35	0.62	-2.8	-0.5	1.49	0.389	-4.5	-1.3	1138.61	194.305	1.76979	6.20918	1.22802	2.214	0.95911	0.100389	0.762465	55.785	2.92492	0.946647	0.0979172	0.738791	56.4895	8.76365	0.9611	0.0688384	0.653626	215.462	11.5666	0.949272	0.0682239	0.633438	218.367	35.1236	0.961789	0.053953	0.552412	847.739	46.5661
120114384	3	43271	1	56	165.8	58.9	21.4263	77.78	0.469119	43389	9.14	0.698	-2.1	-0.8	1.55	0.569	-2.5	-0.8	1317.05	180.246	0.426144	2.37629	1.6751	1.1154	0.974029	0.120202	0.763618	147.19	1.72179	0.959954	0.115037	0.726583	147.022	4.22265	0.976394	0.104443	0.652458	576.492	6.7908	0.962076	0.0996241	0.558212	263.027	16.4715	0.97157	0.00890922	0.427538	1025.67	24.6488
170038232		20190812	2	67	167.1	62.8	22.4909	78.4	0.46918	20190812	10.35	0.837	-1.1	0.4	2.92	0.611	-1.8	-0.2	1165.89	57.5562	0.438709	3.13634	0.998515	1.91038	0.822581	0.0273006	0.59353	55.6722	2.31719	0.784387	0.0248898	0.560114	55.2407	7.28868	0.828754	0.00740922	0.434781	207.958	8.89934	0.790343	0.00676627	0.409229	173.52	34.7466	0.695491	0.00274124	0.284567	673.529	34.8231
180002368	3	43476	2	62	164.7	58	21.3816	77.28	0.469217	43476	10.5	0.785	-1.6	0.2	2.67	0.567	-2.2	-0.5	1178.67	181.186	1.8735	6.10324	1.34763	1.24277	0.971364	0.0416885	0.727489	64.7891	3.03232	0.930248	0.0374151	0.687987	64.2101	4.6012	0.974253	0.0201449	0.591565	249.79	12.1157	0.932248	0.0172926	0.558546	247.376	18.2712	0.974826	0.013642	0.462672	980.666	48.7293
488700		20161012	1	51	171.3	75.6	25.7636	80.4	0.469352	20161012	12.29	0.837	-1.2	-0.6	4.07	0.761	-0.7	0.1	1215.24	66.2674	0.206028	3.27975	0.718212	5.64147	0.594157	0.0151325	0.46788	87.1596	4.32078	0.688582	0.0166377	0.49135	87.8799	22.0853	0.598998	0.00435754	0.330566	330.229	16.6318	0.69752	0.00480604	0.348323	333.225	88.4199	0.599499	0.0015816	0.219893	1282.64	66.4234
483991	3	20200114	1	61	172.1	65.6	22.1484	80.8	0.469494	20200114	13.12	0.912	-0.6	0	3.71	0.797	-0.4	0.5	1207.62	69.5349	0.432548	3.46483	0.851692	3.49667	0.764636	0.017071	0.524247	83.4174	3.88389	0.74014	0.0160864	0.50288	83.0022	13.679	0.769172	0.00478304	0.37409	315.739	15.175	0.745735	0.00450556	0.428434	263.389	27.25	0.830269	0.00262054	0.314834	1018.88	30.706
140157732		20171025	1	54	182.1	78.3	23.6125	85.5	0.469522	20171025	13.78	0.862	-1	-0.4	4.18	0.778	-0.5	0.2	1164.14	60.2654	0.486626	5.3025	1.01723	3.96022	0.646047	0.0204846	0.512474	53.7202	4.74746	0.568128	0.019076	0.490751	52.9223	15.2747	0.654493	0.00561075	0.369738	200.202	18.5504	0.573301	0.00521881	0.536167	832.439	35.4751	0.697627	0.0782703	0.453256	3296.84	43.9695
120162336	3	20130109	1	54	175.1	70.3	22.9289	82.3	0.470017	20121218	11.82	0.81	-1.5	-0.6	4.16	0.775	-0.6	0.4	1157.2	63.5508	0.448386	3.19607	0.996792	2.61654	0.801069	0.0213713	0.556337	51.6568	2.70041	0.790364	0.0213287	0.559456	51.5548	9.9416	0.809114	0.00589895	0.407385	192.372	10.421	0.795513	0.00593848	0.532652	213.961	13.0071	0.857064	0.00567802	0.389542	838.613	16.398
130109237		20151103	2	60	163.7	59.2	22.0915	77.1	0.470984	20151103	7.96	0.61	-2.9	-1	2.55	0.528	-2.9	-0.9	1155.39	42.3245	0.230572	4.70754	0.999998	1.27217	0.781781	0.0502745	0.652827	47.5382	1.19833	0.791982	0.051684	0.663583	47.2789	4.52993	0.800274	0.0139601	0.496492	176.621	4.30056	0.808091	0.0143698	0.385179	169.959	48.7184	0.724703	0.00217691	0.266104	660.196	48.3625
130171566		20191108	1	53	178.6	75.4	23.6379	84.2	0.471445	20191108	15.75	0.932	-0.4	0.5	5.73	0.934	0.7	2.3	1130.54	102.627	0.968622	5.27866	1.04013	5.84146	0.778817	0.0159211	0.498471	43.4795	6.62222	0.746894	0.0141506	0.471785	42.7478	23.031	0.785856	0.00665066	0.360222	162.583	26.5378	0.750969	0.00534321	0.360269	254.562	41.0336	0.738343	0.00229217	0.275728	994.126	58.6561
359190	3	20181101	2	78	165.2	63.8	23.3776	77.9	0.47155	20181011	10.1	0.768	-1.7	0.1	2.64	0.556	-2.3	-0.6	1157.81	52.6274	0.955946	6.44645	1.02507	2.05865	0.757736	0.0368936	0.600577	49.8513	2.44309	0.711738	0.0333149	0.576464	49.0168	7.82869	0.768529	0.00997881	0.442876	186.214	9.49303	0.718442	0.00894956	0.433202	121.562	27.7163	0.841177	0.00289602	0.322066	478.426	36.0568
130034807	3	20130313	1	39	179.1	73.7	22.9761	84.5	0.471803	20130313	14.31	1.102	1.2	1.2	3.96	0.923	1.1	1.56	1314.61	59.061	0.231167	3.71476	0.31829	2.62753	0.69814	0.0301172	0.564845	170.929	4.11969	0.530029	0.0244234	0.516126	169.747	10.2627	0.71031	0.00922919	0.412922	661.079	16.4745	0.538224	0.00747288	0.265366	272.481	108.011	0.613365	0.00165694	0.196253	1093.57	184.897
549802	3	20170118	1	71	173.2	73.2	24.4014	81.8	0.472286	20170118	14.89	1.099	1.1	1.2	4.22	0.809	0.1	0.5	1159.38	74.7678	0.802807	4.90447	1.0503	5.45677	0.674611	0.0146599	0.467434	53.0025	4.93338	0.703279	0.0154005	0.476372	53.0572	21.4079	0.681351	0.00421715	0.332827	198.402	19.2256	0.711189	0.00436182	0.32997	198.662	84.938	0.684204	0.00154679	0.22418	765.689	76.1634
180100260	3	20190819	2	52	162.3	60.7	23.0437	76.7	0.472582	20190819	13.72	0.949	-0.3	0.2	4.09	0.81	-0.3	0.5	1214.69	59.5723	0.0631566	3.58177	0.622373	3.75304	0.670398	0.0211308	0.520476	86.8819	3.58784	0.676548	0.0216846	0.518054	86.327	14.3462	0.681288	0.00611932	0.364454	327.86	13.7257	0.686919	0.00609843	0.433212	264.198	22.7425	0.876265	0.00248193	0.329978	1038.18	29.489
130018496	3	20151224	2	57	168.2	65.3	23.0813	79.5	0.472652	20151224	11.58	0.849	-1.1	0	3.54	0.693	-1	0	1176.88	68.5205	0.231667	3.24309	0.966855	3.05123	0.796623	0.0192411	0.547588	63.8838	4.05814	0.732097	0.0176838	0.524934	63.141	11.7727	0.802164	0.00552838	0.39413	239.902	15.7631	0.737663	0.00504284	0.377199	237.78	48.861	0.691136	0.00223074	0.264237	919.958	47.0941
248242	3	20161201	2	49	162.1	59.1	22.4917	76.7	0.473165	20161201	15.38	0.845	-1.2	-0.6	3.54	0.659	-0.9	-0.9	1171.97	55.5923	0.30704	3.90317	0.977663	4.02067	0.591918	0.0212543	0.502011	57.6067	4.3882	0.546591	0.0210994	0.503477	57.0916	15.7716	0.596008	0.00581402	0.354873	215.184	17.1092	0.554044	0.00575627	0.507463	746.217	27.3277	0.8287	0.0291879	0.402008	2938.64	31.7366
160089903	3	42590	1	64	165	50	18.3655	78.12	0.473455	42566	18.32	1.054	1.1	1.2	7.14	1.13	3.3	3.7	1282.02	227.452	1.63786	5.43879	1.80143	1.10126	0.973783	0.0592368	0.741674	111.234	2.20139	0.947265	0.0523938	0.704064	110.501	4.12257	0.976273	0.0437156	0.617657	431.954	8.73843	0.949396	0.0393521	0.567762	428.933	16.373	0.976837	0.0389625	0.499088	1703.21	35.1138
351763	3	44043	2	44	159	52.5	20.7666	75.3	0.473585	44043	11.26	0.88	-0.8	-0.5	2.86	0.646	-1.5	-1	1287.94	206.105	1.72859	6.31079	1.68086	1.15948	0.969081	0.0617429	0.725447	119.925	1.98077	0.946363	0.0492554	0.685517	116.931	4.34052	0.972084	0.0474826	0.595496	466.565	7.8435	0.948634	0.0355399	0.551597	454.269	17.0739	0.973033	0.0412764	0.482894	1839.55	31.5729
150144230	3	20161205	1	41	171.1	62.9	21.4858	81.2	0.474576	20161205	14.14	0.85	-0.5	-0.1	3.47	0.686	-1.5	-0.2	1189.64	85.7768	2.377	13.9054	1.09664	4.65896	0.683526	0.0178091	0.494425	67.4867	5.46089	0.633206	0.0169069	0.478929	67.4989	18.3319	0.69046	0.00524425	0.351709	254.773	21.5842	0.640222	0.0050582	0.41669	468.552	31.881	0.716913	0.00276686	0.29678	1834.62	36.2975
150162513	3	20190823	1	50	173.3	60.5	20.1446	82.4	0.475476	20190823	15.29	0.901	-0.7	-0.2	4.02	0.733	-0.9	-0.2	1197.59	63.0477	0.106215	3.7552	0.818581	4.35492	0.647959	0.018672	0.495342	74.7855	6.53486	0.467606	0.0163647	0.44378	73.5876	17.1791	0.65188	0.00538508	0.34969	282.331	25.9209	0.470802	0.00469278	0.303368	277.624	68.2145	0.653319	0.00204637	0.234506	1096.07	103.008
150062134		20190527	1	57	182.9	86.9	25.9772	87	0.47567	20190527	20.04	1.203	1.8	1.8	5.51	1.052	1.7	2.6	1301.59	75.0274	0.159483	3.07907	0.530508	5.49675	0.601859	0.0215888	0.496218	157.44	4.82614	0.649464	0.0218822	0.503129	157.531	22.2773	0.60705	0.00842807	0.36055	608.28	19.2549	0.659651	0.00842411	0.358638	608.787	90.2552	0.608694	0.0046787	0.25288	2388.27	77.5222
140056707		20170616	2	35	167.7	57.2	20.339	79.8	0.47585	20170616	10.9	0.868	-0.9	-0.8	3.76	0.868	0.6	0.9	1263.8	61.4391	0.960877	6.02312	0.256587	1.68363	0.829678	0.0298095	0.624334	124.849	2.37544	0.759706	0.0253866	0.578086	124.256	6.25731	0.841474	0.00855443	0.468193	477.573	9.09048	0.769675	0.00722728	0.421178	475.16	24.6468	0.844888	0.00270989	0.331311	1868.25	35.9224
150089599	3	20170323	1	62	179.6	69.3	21.4843	85.5	0.476058	20170323	12.19	0.765	-1.8	-0.6	3.6	0.64	-1.7	-0.4	1201.5	66.2119	0.94936	5.77978	0.874631	2.48235	0.798864	0.0224425	0.562914	77.5345	2.66968	0.790192	0.0216884	0.565371	78.7489	9.51204	0.806854	0.00627231	0.410508	292.194	10.1097	0.800967	0.0060752	0.405634	191.909	39.6372	0.809766	0.00185379	0.273778	741.561	41.5098
170085942	3	20180620	1	59	174.9	64.9	21.2161	83.3	0.476272	20180620	16.13	0.945	-0.3	0.2	5.08	0.931	0.7	1.6	1187.82	61.126	-0.131565	3.46016	0.868534	3.86439	0.671559	0.019282	0.510256	68.3145	3.83924	0.669965	0.0192917	0.508398	68.3661	15.0775	0.677488	0.00531067	0.362758	256.806	14.8598	0.67873	0.00541842	0.364564	257.097	59.253	0.681756	0.00179576	0.241985	995.259	58.5978
150078306	3	20200720	1	32	177.4	65.4	20.7812	84.5	0.476325	20200720	16.52	1.029	0.4	0.4	4.42	0.804	-0.3	-0.1	1255.68	67.9164	0.653179	4.71595	0.465271	4.59721	0.634228	0.0180811	0.500179	117.061	4.87395	0.608046	0.0172157	0.485787	117.064	17.7812	0.648366	0.00540349	0.359969	448.183	19.0616	0.619134	0.00509419	0.342424	447.996	70.161	0.653955	0.00202261	0.2426	1753.17	75.8186
468346	3	20190318	1	62	175.2	76.7	24.9878	83.5	0.476598	20190318	12.01	0.856	-1.1	-0.3	3.39	0.69	-1.3	-0.3	1178.15	61.5518	0.439304	3.81785	0.996694	3.80171	0.677951	0.0195632	0.510583	62.2547	3.72941	0.684952	0.0196668	0.515137	62.6293	14.8336	0.685	0.00536197	0.36314	233.454	14.5383	0.691804	0.00541646	0.364819	234.823	59.0638	0.686219	0.00179252	0.244845	904.186	57.6997
180001246		20180103	2	77	160.4	58.1	22.5823	76.5	0.476933	20180103	9.37	0.831	-1.2	-0.2	3.52	0.742	-0.6	0.3	1221.87	52.2071	0.483471	3.69191	0.448675	2.21542	0.740649	0.0297441	0.58026	91.5262	2.50159	0.704623	0.0289205	0.572595	91.3118	8.34579	0.752544	0.00826633	0.426644	346.616	9.51675	0.716195	0.00833823	0.452135	106.739	22.4563	0.808303	0.00344507	0.333933	411.824	25.8605
120085400		20200715	2	68	158.3	58.8	23.4647	75.5	0.476943	20200715	11.51	0.77	-1.8	-1	3.22	0.651	-1.6	-0.8	1164.58	119.703	3.13701	17.5576	1.16519	0.952	0.958492	0.0333824	0.703187	55.6872	1.32435	0.939163	0.030975	0.680018	54.7745	3.2768	0.96488	0.0102605	0.548962	210.184	4.81454	0.945351	0.00920186	0.358863	173.652	57.8546	0.821544	0.00199176	0.255064	656.211	60.3825
190091903	3	20190724	1	47	171.8	67	22.7001	82	0.477299	20190724	16.75	1.041	0.5	0.6	4.44	0.772	-0.6	-0.1	1260.6	59.9333	0.18738	3.82273	0.309065	3.58311	0.66769	0.0199717	0.516412	123.435	4.24729	0.60786	0.0186884	0.497389	122.783	13.8128	0.678058	0.00561267	0.364842	470.582	16.5305	0.616622	0.00537232	0.330691	500.587	60.1792	0.757092	0.00273823	0.267121	1972.65	87.076
160074837	3	43592	1	47	173	70.9	23.6894	82.64	0.477688	43592	16.42	0.918	-0.6	-0.1	4.13	0.797	-0.4	0.3	1231.97	144.627	1.00512	4.21822	1.42603	0.883312	0.978761	0.041182	0.74423	103.369	1.33681	0.967134	0.0360379	0.68886	101.428	3.17761	0.981414	0.0236635	0.608063	399.655	5.02648	0.969844	0.0206792	0.549526	391.899	12.4775	0.982007	0.0185909	0.476336	1571.4	19.9293
120079869	2	41121	1	41	174.9	70.1	22.916	83.55	0.477702	41107	15.29	0.901	-0.7	-0.2	4.02	0.733	-0.9	-0.2	1197.59	63.0477	0.106215	3.7552	0.818581	4.35492	0.647959	0.018672	0.495342	74.7855	6.53486	0.467606	0.0163647	0.44378	73.5876	17.1791	0.65188	0.00538508	0.34969	282.331	25.9209	0.470802	0.00469278	0.718494	695.344	13.5386	0.977043	0.24251	0.668139	2770.39	27.1104
130044208	3	20150529	2	32	165.3	65.2	23.8617	79	0.477919	20150529	14.31	1.102	1.2	1.2	3.96	0.923	1.1	1.56	1314.61	59.061	0.231167	3.71476	0.31829	2.62753	0.69814	0.0301172	0.564845	170.929	4.11969	0.530029	0.0244234	0.516126	169.747	10.2627	0.71031	0.00922919	0.412922	661.079	16.4745	0.538224	0.00747288	0.368321	655.975	41.1461	0.713976	0.00411169	0.2849	2597.6	66.399
140130885	3	20181207	1	37	178.4	74.9	23.5338	85.3	0.478139	20181207	10.53	0.826	-1.2	0.2	3	0.622	-1.7	-0.3	1263.45	121.766	0.973694	3.59405	1.26799	1.03283	0.962525	0.0421237	0.711233	121.619	1.30877	0.951098	0.0395397	0.704859	119.084	3.76152	0.967004	0.0253808	0.563838	470.403	4.86608	0.955872	0.0230252	0.315742	372.534	87.2079	0.68316	0.00159159	0.223575	1474.35	105.031
120161476	3	20181224	1	54	177.3	71.4	22.7133	84.8	0.478285	20181224	11.76	1.052	0.7	0.8	3.54	0.931	1.2	1.3	1340.92	69.313	0.131319	3.35964	0.658296	1.74286	0.80826	0.0697996	0.667716	191.867	2.84268	0.682468	0.056677	0.599571	191.146	6.80408	0.822149	0.0372484	0.524987	746.048	11.4213	0.697289	0.0301959	0.364837	97.9118	63.242	0.637574	0.00214307	0.240445	372.465	58.2233
150107617		20200608	2	60	167.8	62.8	22.3036	80.3	0.478546	20200608	13.6	0.875	-0.9	-0.4	4.34	0.852	0.1	0.7	1176.32	49.0684	0.670185	5.85569	0.946461	2.68631	0.637845	0.0318841	0.55606	59.3123	2.99456	0.587124	0.0309269	0.546568	58.6517	10.2744	0.650347	0.00865519	0.399238	222.726	11.7578	0.592371	0.00820677	0.446921	222.133	27.9547	0.797176	0.00290541	0.296876	862.072	28.2392
495899	3	43223	2	45	160.8	57.5	22.238	76.97	0.478669	43223	15.21	0.904	-0.7	0	3.9	0.643	-1.6	-0.7	1193.89	60.1415	0.619604	3.98882	0.873999	2.6963	0.765625	0.023544	0.554441	72.6844	3.43429	0.697894	0.0215746	0.520766	71.9753	10.4602	0.77109	0.00649486	0.398451	273.459	13.3626	0.704132	0.00587369	0.638149	712.262	11.4117	0.961601	0.107209	0.573318	2856.5	14.978
150142481		20151104	1	46	175	75.4	24.6204	83.8	0.478857	20151104	15.94	1.032	0.4	0.7	5.47	1.017	1.4	2	1264.59	58.3768	0.601649	4.69491	0.257388	4.44286	0.53509	0.0214505	0.508861	124.863	4.0564	0.572441	0.0216219	0.509729	123.503	17.479	0.544807	0.00609279	0.363789	477.744	15.9512	0.580526	0.00604388	0.360592	472.274	70.0681	0.545299	0.00215945	0.244537	1869.42	63.7256
348998	3	41983	1	56	167.4	63	22.4817	80.38	0.480167	41983	17.1	1.15	1.4	1.5	4.66	0.835	-0.1	0.6	1268.83	73.3863	0.912244	6.48224	0.453964	3.15269	0.760819	0.0207629	0.546016	129.298	4.65957	0.636041	0.0180644	0.510863	128.54	12.2774	0.770012	0.00645658	0.398251	494.829	18.4478	0.644452	0.00540782	0.527014	330.653	16.1906	0.974213	0.0136682	0.458533	1349.94	28.1601
400386		20161014	2	54	163	58.8	22.1311	78.3	0.480368	20161014	13.38	0.951	-0.1	1.5	3.46	0.7	-1	1.5	1196.39	68.6873	1.21518	7.40948	0.938027	2.06707	0.839228	0.0242534	0.582944	74.8799	3.39329	0.73293	0.0199435	0.528958	73.5299	7.8811	0.846341	0.00666419	0.428956	282.64	13.3976	0.735489	0.00552796	0.368768	285.851	38.2276	0.740154	0.00227753	0.283453	1119.08	55.8146
150089735	3	43535	1	45	179.6	67.1	20.8022	86.43	0.481236	43535	12.71	0.809	-1.5	-0.9	4.16	0.781	-0.5	0.1	1227.29	123.629	0.943937	3.44159	1.31333	1.08702	0.967245	0.034316	0.700655	99.4961	1.35129	0.960297	0.0331647	0.694906	97.87	3.96632	0.970977	0.0163826	0.55111	382.811	5.10057	0.963669	0.0157984	0.546294	376.441	15.3839	0.972179	0.0113005	0.421291	1499.78	19.857
447321	3	20200512	2	63	165.6	66.3	24.1765	79.7	0.48128	20200512	7.43	0.655	-2.7	-0.7	2.92	0.642	-1.5	0.3	1143.22	44.4637	-0.104412	3.29602	0.955481	1.89744	0.701902	0.0374442	0.593028	41.4315	2.69118	0.580599	0.0322491	0.557299	40.7875	7.18462	0.714675	0.0104566	0.436174	152.936	10.4029	0.590104	0.00888084	0.402627	150.343	27.9758	0.719748	0.00325726	0.299312	586.694	40.8735
330683		20190118	2	49	160.4	63.6	24.72	77.2	0.481297	20190118	12.43	0.867	-0.9	-0.3	3.02	0.61	-1.8	-1.2	1237.73	54.6323	0.630785	5.12068	0.325322	1.85976	0.79175	0.0311417	0.594466	103.938	2.43111	0.72452	0.0279537	0.559093	103.239	7.09424	0.799585	0.0085871	0.434313	394.889	9.16389	0.737749	0.00778642	0.414265	392.276	27.9745	0.801923	0.00262843	0.298977	1540.84	36.3294
244263	3	20160513	1	52	177.8	75.2	23.7878	85.6	0.48144	20160513	13.72	0.949	-0.3	0.2	4.09	0.81	-0.3	0.5	1214.69	59.5723	0.0631566	3.58177	0.622373	3.75304	0.670398	0.0211308	0.520476	86.8819	3.58784	0.676548	0.0216846	0.518054	86.327	14.3462	0.681288	0.00611932	0.364454	327.86	13.7257	0.686919	0.00609843	0.366302	325.642	57.5243	0.680613	0.00201336	0.241677	1275.98	54.4041
150139708	3	42676	1	54	166.8	58	20.8466	80.32	0.481535	42676	13.53	0.916	-0.6	-0.1	4.3	0.815	-0.2	0.6	1210.27	147.658	1.48497	5.91469	1.44091	1.62002	0.958957	0.0278108	0.670055	87.0432	2.04233	0.946296	0.0259534	0.656746	84.469	6.07068	0.962446	0.0141716	0.525821	334.623	7.75998	0.950044	0.0126316	0.513237	324.356	24.0408	0.963326	0.0100309	0.394335	1313.05	31.0481
140173855	3	20200714	1	64	174.2	75.3	24.8141	83.9	0.48163	20200618	8.62	0.679	-2.5	-0.5	2.84	0.567	-2.2	-0.5	1137.17	48.4569	0.30054	3.228	0.90139	2.03517	0.731341	0.0352063	0.608781	38.9009	1.81238	0.762734	0.0355741	0.611627	38.8111	7.64322	0.7435	0.00958589	0.452607	143.577	6.67698	0.777466	0.00953317	0.448527	143.336	30.2161	0.746214	0.00283799	0.316278	551.386	26.1825
130142977	3	20190723	1	50	169.2	67.3	23.5079	81.5	0.481678	20190723	12.1	0.872	-0.8	-0.1	2.68	0.582	-2.1	-1.3	1178.8	58.1429	0.151343	3.27924	0.936095	3.01587	0.715982	0.0222277	0.536458	62.605	3.37332	0.685439	0.0211112	0.520076	62.3739	11.4298	0.729787	0.0061065	0.381927	235.363	13.1695	0.691655	0.00578736	0.328158	210.57	58.7928	0.709462	0.00174535	0.246096	836.855	85.7495
180002368		20190111	2	62	167.3	66.9	23.902	80.6	0.481769	20190111	10.5	0.785	-1.6	0.2	2.67	0.567	-2.2	-0.5	1161.51	52.5995	0.560192	4.73846	1.00484	2.42041	0.720736	0.0289565	0.560715	52.1727	3.00833	0.65848	0.0265089	0.54159	51.216	9.31194	0.729199	0.00769724	0.402442	194.77	11.4462	0.672297	0.00725592	0.38127	191.198	36.484	0.733853	0.00246358	0.275325	751.085	45.0981
530437	3	20190729	2	71	159.7	58.9	23.0943	77	0.482154	20190729	8.46	0.704	-2	-0.9	3.17	0.627	-1.8	-0.3	1225.73	210.289	2.04568	8.14114	1.59953	1.45376	0.969109	0.0334317	0.700431	87.4122	2.66377	0.942505	0.0282829	0.636331	85.5674	5.59068	0.971095	0.0193538	0.560176	336.928	10.4609	0.944988	0.0161867	0.376815	237.02	46.6255	0.803793	0.0019417	0.262522	929.432	62.1853
150136248		20171205	2	49	164.8	66.9	24.6327	79.5	0.482403	20171205	12.77	0.89	-0.7	-0.1	3.28	0.733	-0.7	-0.1	1246.79	60.9251	0.664734	4.90083	0.407236	2.02895	0.809661	0.0287768	0.608087	111.697	2.72314	0.735203	0.0258555	0.564372	111.041	7.64868	0.820655	0.00798476	0.448904	425.938	10.4476	0.746034	0.00738847	0.409091	423.23	30.2803	0.823234	0.00264197	0.311337	1662.26	41.4113
378597		20151030	1	65	179.5	81.4	25.2636	86.6	0.482451	20151030	15.23	0.927	-0.5	0.1	3.98	0.771	-0.6	0.4	1191.8	67.2756	0.169435	3.74878	0.887246	4.8734	0.653475	0.0154973	0.482596	71.4971	6.00174	0.573771	0.0146349	0.466671	71.0791	19.0836	0.65939	0.0043753	0.340619	269.971	23.3808	0.583225	0.00418469	0.329892	268.27	75.4762	0.662574	0.00154387	0.228495	1046.93	92.793
130138224	3	20191015	1	40	174	70.3	23.2197	84	0.482759	20191015	7.83	0.579	-3.4	-1.2	2.97	0.61	-1.8	0	1220.59	170.631	0.965316	3.40229	1.54174	1.05508	0.979998	0.0507703	0.749686	97.2952	2.89143	0.944713	0.0429878	0.692623	96.759	4.00282	0.981647	0.0346324	0.623615	377.975	11.61	0.946237	0.029488	0.264018	311.956	79.5817	0.723702	0.00159864	0.227163	1263.43	170.743
161487	2	42905	2	55	153.5	41.9	17.7827	74.11	0.482801	42920	8.46	0.704	-2	-0.9	3.17	0.627	-1.8	-0.3	1225.73	210.289	2.04568	8.14114	1.59953	1.45376	0.969109	0.0334317	0.700431	87.4122	2.66377	0.942505	0.0282829	0.636331	85.5674	5.59068	0.971095	0.0193538	0.560176	336.928	10.4609	0.944988	0.0161867	0.503594	329.593	22.1082	0.971793	0.0152223	0.439037	1324.08	42.0239
130098432	3	20190823	1	50	170	66.5	23.0104	82.1	0.482941	20190823	11.91	0.916	-0.5	-0.2	3.98	0.828	0.2	0.7	1373.17	154.694	1.16854	4.49093	1.21073	0.797661	0.953597	0.14449	0.786706	184.261	1.00416	0.941512	0.128173	0.752913	181.916	2.87602	0.960296	0.117454	0.681804	721.948	3.72176	0.948383	0.0992208	0.498249	184.327	14.9301	0.728667	0.00532105	0.368161	716.585	17.1282
130029485		20130304	1	47	176.2	75.5	24.3184	85.1	0.482974	20130304	16.32	1.006	0.2	0.5	5.34	0.926	0.6	1.3	1276.21	74.4643	0.219602	2.69045	0.498176	4.15929	0.736042	0.018548	0.527177	137.449	4.25179	0.721569	0.0183632	0.521685	137.269	16.5479	0.742244	0.00631429	0.385589	528.291	16.8867	0.728419	0.00604662	0.374473	527.621	66.0707	0.744666	0.00276939	0.267876	2069.31	67.3307
130181417	3	20171114	2	47	179.9	64.1	19.806	86.9	0.483046	20171114	10.35	0.866	-0.9	-0.5	3.01	0.684	-1.1	-0.6	1278.54	60.8431	0.254322	6.46735	0.259122	1.47674	0.843458	0.0363453	0.655937	138.384	2.85315	0.690674	0.026598	0.557098	137.093	5.41337	0.856754	0.0107011	0.497279	530.012	11.0979	0.699427	0.00750105	0.404603	524.747	21.5151	0.859245	0.00351136	0.352984	2075.61	44.4767
493291		20190701	2	64	157.3	61.4	24.8148	76	0.483153	20190701	11.17	0.787	-1.6	0.2	3.2	0.708	-0.9	1	1207.27	51.0772	0.322844	3.37024	0.617906	2.099	0.745614	0.0309378	0.585493	80.8605	2.78075	0.672964	0.0270248	0.547137	80.4906	7.91694	0.756197	0.00842242	0.426824	305.094	10.5207	0.685265	0.00762014	0.401929	303.697	31.3442	0.758547	0.00268386	0.292762	1185.4	41.7132
140098875		20181108	2	31	160.8	60.5	23.3982	77.7	0.483209	20181108	9.71	0.684	-2.2	-0.8	2.79	0.568	-2.5	-0.7	1199.18	70.5982	0.303676	4.05135	0.891492	5.78034	0.615907	0.0146401	0.46374	76.1674	7.63333	0.494552	0.0135581	0.442404	75.0814	22.6214	0.621309	0.00427323	0.32207	288.111	29.8178	0.502456	0.00405504	0.392744	600.716	60.854	0.823689	0.0130792	0.314175	2382.18	90.9414
130041337	3	20130325	1	60	171.1	63.5	21.6907	82.7	0.483343	20130325	15.51	1.056	0.6	0.9	4.94	1.02	1.4	2.3	1276.83	87.8858	2.0797	13.5238	0.514887	2.91849	0.76836	0.0253485	0.552916	131.72	3.84813	0.676259	0.0235271	0.535078	130.787	11.4069	0.778866	0.00898588	0.409999	505.553	15.2574	0.686704	0.00761848	0.372241	242.388	60.6846	0.614469	0.00196746	0.22984	929.41	56.9
240113	3	20190320	2	59	164.6	67.5	24.914	79.6	0.483597	20190320	9.94	0.728	-2.1	-0.4	3.34	0.706	-0.9	0.7	1143.62	68.3073	1.07439	6.64137	1.01329	2.50921	0.814287	0.0239111	0.578518	44.4883	2.974	0.77956	0.022685	0.55855	44.07	9.63464	0.821444	0.00660517	0.425667	165.33	11.51	0.786546	0.0062465	0.40616	163.669	38.2031	0.823732	0.0020458	0.292031	637.45	45.824
513373	3	20200114	2	59	164.7	66.5	24.5151	79.7	0.48391	20200114	6.97	0.646	-2.8	-0.6	2.68	0.55	-2.4	-0.5	1126.64	47.4363	0.634559	4.70043	0.794498	2.01111	0.719862	0.0350735	0.603974	33.7006	1.77258	0.752124	0.0363338	0.601143	33.7012	7.59222	0.73243	0.0094463	0.444269	123.628	6.50892	0.769719	0.00989922	0.439568	123.828	29.8494	0.736674	0.00289259	0.308056	472.746	25.4019
130093961		20151026	1	63	180.4	79.4	24.3976	87.3	0.483925	20151026	14.45	0.914	-0.6	0	4.33	0.831	-0.1	0.9	1163.84	76.9164	0.941907	6.47047	1.05999	5.90789	0.633996	0.0142686	0.45372	54.1362	8.8332	0.459878	0.0121066	0.422071	52.8409	23.3088	0.641504	0.00409522	0.316369	202.728	35.0131	0.468597	0.00367138	0.289968	197.507	93.0085	0.644291	0.0016019	0.211591	784.156	140.192
170077578	3	42928	2	54	159.5	57	22.4054	77.19	0.48395	42928	12.06	0.857	-1.1	-0.3	4.28	0.814	-0.3	0.7	1356.21	220.4	0.528803	2.34547	1.82569	1.19843	0.972716	0.128527	0.771903	157.503	0.775118	0.982435	0.127951	0.778787	156.194	4.61725	0.974673	0.110966	0.66295	617.16	2.8281	0.984569	0.111173	0.621866	611.236	9.99896	0.978359	0.0830674	0.566009	2448.53	19.9063
234677		20170426	1	45	180.5	83.6	25.6597	87.4	0.484211	20170426	19.1	1.097	0.9	1.1	5.43	0.955	0.9	1.5	1254.4	81.553	0.858054	4.9586	0.652185	4.27311	0.737227	0.0163183	0.513195	117.054	7.16068	0.55902	0.013055	0.44575	115.349	16.9286	0.742755	0.00525799	0.364576	447.505	28.401	0.568233	0.00416824	0.313218	440.806	67.4419	0.744949	0.00237938	0.25077	1752.17	113.08
170048594	3	20181106	1	68	174.9	64.7	21.1507	84.7	0.484277	20181106	15.42	1.044	0.5	0.8	3.61	0.714	-1.1	0.1	1214.75	75.895	1.2676	8.30691	0.826379	5.62297	0.614141	0.0149196	0.4779	86.2162	5.16532	0.639053	0.015189	0.477562	85.3718	22.2615	0.618825	0.00439554	0.341869	326.051	20.2557	0.646747	0.00446564	0.328459	322.845	88.7757	0.621921	0.00167184	0.228058	1268.64	80.9582
130100058		20150513	1	64	181.9	79.7	24.0876	88.1	0.484332	20150513	12.79	0.957	-0.2	0.3	3.95	0.745	-0.8	0.2	1235.88	64.825	0.375405	3.67345	0.503784	2.87919	0.779531	0.0206597	0.549432	103.73	3.71592	0.712279	0.018092	0.512877	103.273	11.0311	0.786391	0.00571043	0.398925	394.974	14.406	0.717675	0.00503026	0.363396	393.074	43.6352	0.788523	0.00188512	0.272168	1541.33	57.3027
140055517	3	20160315	1	57	176.1	70.8	22.8305	85.3	0.484384	20160315	9.14	0.783	-1.7	-0.8	3.38	0.635	-1.7	-0.7	1189.95	56.8639	0.184131	3.52269	0.849864	1.82572	0.81939	0.0305862	0.61255	69.7512	2.07851	0.799875	0.0282758	0.585666	69.9227	6.90385	0.827851	0.00833979	0.454387	262.691	7.75289	0.811913	0.00776121	0.332202	248.608	80.8417	0.653875	0.00168692	0.212677	967.155	80.9113
477774	3	20180627	1	59	175.2	69.3	22.5769	84.9	0.484589	20180612	10.59	0.878	-0.8	-0.6	3.87	0.8	0	0.4	1272.32	62.209	-0.432291	6.02948	0.360524	1.7208	0.848194	0.0329864	0.615864	134.026	1.76577	0.836642	0.0336144	0.615948	133.945	6.43196	0.857495	0.00922729	0.456019	513.525	6.69691	0.844375	0.00947942	0.364903	126.712	55.2667	0.624894	0.00198885	0.253046	493.079	57.2763
150068471	3	20170616	2	45	162.8	61.5	23.2042	78.9	0.484644	20170616	8.1	0.673	-2.3	-0.3	2.39	0.501	-2.8	-0.8	1148.51	156.93	2.18483	8.83312	1.17862	1.87363	0.954254	0.0375029	0.694773	54.1547	4.06576	0.898669	0.0332845	0.639754	52.0612	7.24758	0.956764	0.0144741	0.550661	206.889	16.1947	0.901314	0.0122977	0.343937	458.723	54.7029	0.788693	0.00234769	0.256415	1815.96	75.9992
352920		20170120	2	63	166.3	61.4	22.2016	80.6	0.484666	20170120	11.07	0.764	-1.8	-0.4	3.72	0.744	-0.8	0.7	1118.51	46.2355	0.460598	4.51767	0.710104	1.83268	0.730983	0.0356231	0.602179	30.0346	1.85343	0.724031	0.0364836	0.610678	29.8093	6.92878	0.741236	0.00961095	0.437749	109.465	6.91765	0.738334	0.00976163	0.345438	236.925	60.9302	0.749778	0.00164932	0.240629	917.525	68.3089
523313	3	20181127	2	48	179.9	72.2	22.3087	87.2	0.484714	20181127	15.43	1.007	0.2	0.7	4.55	0.908	0.5	1.8	1164.82	31.5965	0.0811814	3.34269	0.97581	0.993889	0.706159	0.0690284	0.68025	51.9083	0.908584	0.724162	0.0728913	0.690747	51.9069	3.44389	0.735761	0.0192969	0.52392	192.629	3.17224	0.749714	0.0208729	0.378872	290.765	34.2126	0.783092	0.00239512	0.292073	1138.47	55.1337
130181417		20171114	2	47	161	64.2	24.7676	78.1	0.485093	20171114	10.35	0.866	-0.9	-0.5	3.01	0.684	-1.1	-0.6	1278.54	60.8431	0.254322	6.46735	0.259122	1.47674	0.843458	0.0363453	0.655937	138.384	2.85315	0.690674	0.026598	0.557098	137.093	5.41337	0.856754	0.0107011	0.497279	530.012	11.0979	0.699427	0.00750105	0.404603	524.747	21.5151	0.859245	0.00351136	0.352984	2075.61	44.4767
477774	3	20170317	1	58	175.2	69.3	22.5769	85	0.48516	20170317	15.95	0.905	-0.7	-0.1	4.45	0.812	-0.3	0.5	1153.31	53.5908	0.315487	3.96212	1.00212	2.97331	0.670971	0.0247503	0.540713	47.2361	2.87639	0.679849	0.0250669	0.540838	47.2384	11.5094	0.680095	0.00667121	0.386186	175.399	11.1384	0.688307	0.00677512	0.339313	147.783	57.7743	0.683054	0.00183892	0.250656	578.499	73.7717
417402		20191202	1	45	172.3	76.7	25.836	83.6	0.4852	20191202	14.35	0.923	-0.5	-0.1	3.8	0.728	-1	-0.3	1210.53	79.2679	0.309915	3.74064	0.908276	5.9336	0.678694	0.0123438	0.469898	85.8923	7.94898	0.561802	0.0113684	0.430169	84.2619	23.2825	0.685871	0.00364183	0.326065	325.652	31.5374	0.566961	0.00338933	0.295851	319.177	92.9885	0.687065	0.00144682	0.21333	1269.51	125.724
398654	3	20150506	1	41	175.8	73.1	23.6526	85.3	0.48521	20150506	12.08	0.802	-1.5	-0.6	3.22	0.704	-1.1	-0.2	1265.16	74.9695	0.438959	3.86873	0.529133	3.49338	0.768944	0.0177963	0.519809	128.017	5.54915	0.636012	0.0149617	0.484177	126.275	13.4037	0.778501	0.00546605	0.378043	490.813	21.7413	0.643644	0.00449741	0.366077	368.7	72.2639	0.587584	0.00170556	0.228342	1432.07	61.9989
120114384	3	42521	1	54	165.8	58.9	21.4263	80.45	0.485223	42529	11.75	0.65	-2	-1.7	2.8	0.522	-3.3	-2.4	1147.58	154.206	2.09818	7.6774	1.20055	1.30702	0.965937	0.0389869	0.725096	52.2788	2.21936	0.94137	0.0346303	0.680786	51.2256	4.91165	0.968786	0.0155542	0.576989	199.56	8.63168	0.944386	0.0134624	0.552635	259.685	15.975	0.972699	0.00923781	0.442365	1022.34	23.6556
536655	3	43144	2	72	155.5	58.6	24.2347	75.48	0.485402	43144	8.1	0.673	-2.3	-0.3	2.39	0.501	-2.8	-0.8	1148.51	156.93	2.18483	8.83312	1.17862	1.87363	0.954254	0.0375029	0.694773	54.1547	4.06576	0.898669	0.0332845	0.639754	52.0612	7.24758	0.956764	0.0144741	0.550661	206.889	16.1947	0.901314	0.0122977	0.502124	198.395	28.8897	0.957492	0.00811315	0.423108	809.09	65.6523
510388	3	20150407	1	47	172.2	71.6	24.1461	83.6	0.485482	20150407	12.2	0.857	-1.1	-0.5	3.54	0.711	-1.1	-0.3	1213.25	65.1462	0.18468	3.22314	0.732485	4.68452	0.646339	0.0165975	0.472082	86.0536	5.86305	0.565559	0.0152108	0.469518	85.6882	18.2747	0.651322	0.00501383	0.324659	325.531	23.1214	0.56697	0.00459448	0.330645	324.094	73.3401	0.651123	0.00184963	0.212093	1265.65	92.7804
142840	3	20200519	1	53	169.3	68.8	24.0035	82.2	0.485529	20200519	14.69	1.016	0.4	1.1	4.23	0.826	0.2	1.2	1269.65	73.3611	1.60096	10.8335	0.431733	3.13196	0.727955	0.0232099	0.555026	127.475	3.15704	0.724187	0.0226546	0.542435	128.095	12.1371	0.737042	0.00681754	0.406202	489.163	12.1763	0.735012	0.00678299	0.395397	491.605	48.0872	0.739609	0.00258211	0.279536	1912.34	48.3089
170127596	3	42992	2	64	159.8	55	21.5382	77.59	0.485544	42992	17.44	1.11	1	1.4	4.08	0.759	-0.7	0.9	1146.69	83.5419	0.839582	5.17554	1.05052	3.88326	0.803362	0.0150151	0.516594	48.1157	4.64496	0.757777	0.0144941	0.501269	47.401	15.126	0.809549	0.00444065	0.372471	179.761	18.246	0.763052	0.00425589	0.562491	375.741	15.8752	0.982085	0.0280136	0.497586	1489.63	46.8433
270130	3	20151014	1	29	178.7	74.1	23.2043	86.8	0.48573	20151014	12.2	0.857	-1.1	-0.5	3.54	0.711	-1.1	-0.3	1213.25	65.1462	0.18468	3.22314	0.732485	4.68452	0.646339	0.0165975	0.472082	86.0536	5.86305	0.565559	0.0152108	0.469518	85.6882	18.2747	0.651322	0.00501383	0.324659	325.531	23.1214	0.56697	0.00459448	0.470809	468.145	22.6275	0.797969	0.00337152	0.334423	1831.34	23.0879
398654	3	20160414	1	42	175.8	73.1	23.6526	85.4	0.485779	20160414	14.19	1.041	0.6	0.7	3.34	0.641	-1.5	-1.1	1235.62	76.4411	1.69126	9.58022	0.671496	3.44773	0.738694	0.0193474	0.533318	101.494	3.78618	0.712121	0.0190954	0.526263	100.304	13.3235	0.747867	0.0056336	0.383634	386.226	14.7822	0.719196	0.00561807	0.337705	321.263	46.3389	0.718271	0.00203103	0.267896	1266.13	79.2611
426580	3	20180530	2	71	162.4	63.2	23.9632	78.9	0.485837	20180530	10.323	0.748	-1.9	0.2	2.83	0.515	-2.7	-0.7	1123.74	61.8402	1.09555	5.51555	0.812945	2.22785	0.81221	0.0277945	0.586751	34.7068	2.70613	0.772633	0.026113	0.565018	34.4165	8.43752	0.820724	0.00755961	0.430735	127.516	10.3766	0.780456	0.00711477	0.416366	126.384	33.5133	0.822178	0.00218595	0.295783	489.66	41.1184
170163903		20181204	2	47	160.5	66.4	25.7761	78	0.485981	20181204	13.62	0.992	0.2	0.4	3.56	0.676	-1.2	-0.7	1229	51.0643	0.493848	3.70261	0.360946	2.15833	0.738664	0.0299043	0.576091	95.894	2.07083	0.748004	0.0307866	0.589806	96.1116	8.09583	0.749203	0.00815901	0.424919	363.876	7.70048	0.760224	0.00859648	0.431637	364.675	32.0232	0.751669	0.00249787	0.290601	1418.84	30.5798
428987	2	44012	2	80	150	44.4	19.7333	72.91	0.486067	44007	5.83	0.57	-2.6	-0.5	2.69	0.556	-2.6	0.3	1221.83	163.994	1.68977	7.67081	1.41608	0.869048	0.978924	0.0305612	0.729866	93.131	0.853129	0.979139	0.0313323	0.740875	93.3602	3.10025	0.981744	0.0154098	0.585555	358.725	3.05939	0.981796	0.0151846	0.59633	359.66	12.0946	0.982446	0.0111235	0.449726	1407.61	12.0383
230724	3	43718	2	58	159.5	56.4	22.1696	77.56	0.48627	43718	10.98	0.723	-2.2	-1.2	3.42	0.723	-1	-0.1	1131.47	57.5597	0.594728	4.2387	0.891383	4.3821	0.591321	0.020881	0.50552	36.642	3.6236	0.657938	0.0226226	0.524452	36.7938	16.8673	0.601346	0.00580399	0.360175	134.939	14.1242	0.662015	0.00621195	0.557956	238.715	19.1752	0.964557	0.00759155	0.411083	936.43	26.5456
180150906	3	20181116	2	56	165.7	62.1	22.6176	80.6	0.486421	20181116	19.62	1.176	1.6	1.6	4.93	0.901	0.4	1.3	1209.19	65.6173	0.414067	4.05614	0.767921	4.57817	0.64664	0.017113	0.497959	82.9063	4.79091	0.632228	0.0168485	0.481537	82.9351	17.7545	0.656273	0.00481658	0.352063	313.632	18.5227	0.64372	0.00480604	0.460521	302.953	23.7639	0.842315	0.002872	0.324787	1175.62	24.3878
120159666	3	20180710	1	61	173.9	69.2	22.8827	84.6	0.486486	20180710	9.56	0.714	-2.2	-1.1	3.1	0.719	-0.8	0.1	1189.55	60.5972	-0.190461	3.03505	0.886517	1.58521	0.865638	0.0286689	0.629647	71.0721	2.01571	0.830907	0.0248005	0.583009	70.149	5.77005	0.874685	0.00799147	0.466325	267.778	7.45883	0.839693	0.00703794	0.418647	509.238	52.655	0.819775	0.00393694	0.284943	1999.96	51.3637
557320	3	42871	1	47	170.5	68.7	23.6324	82.95	0.48651	42871	12.37	1	0.3	0.6	3.25	0.754	-0.5	0.1	1335.89	74.7231	0.963144	4.71398	0.611297	1.37884	0.828998	0.0621511	0.68321	183.81	2.0111	0.742392	0.0530776	0.644628	183.106	5.34497	0.842802	0.0312942	0.540166	713.354	7.94503	0.758635	0.026412	0.524066	388.411	19.6992	0.969983	0.0211043	0.430043	1592.42	24.4982
150154055	3	20191203	1	53	178	70.7	22.3141	86.6	0.486517	20191203	13.13	0.829	-1.3	-0.9	3.38	0.685	-1.3	-0.9	1249.07	63.2589	0.493502	4.13557	0.461498	3.52115	0.694732	0.020752	0.523867	112.747	4.86282	0.563673	0.0190335	0.492271	110.692	13.4699	0.708682	0.0059451	0.374262	430.676	19.0641	0.572067	0.00537064	0.346905	457.189	61.6644	0.695452	0.0019183	0.235372	1795.7	69.4494
233792	3	20190909	1	62	179.8	74.4	23.0141	87.5	0.486652	20190909	12.71	0.809	-1.5	-0.9	4.16	0.781	-0.5	0.1	1227.29	123.629	0.943937	3.44159	1.31333	1.08702	0.967245	0.034316	0.700655	99.4961	1.35129	0.960297	0.0331647	0.694906	97.87	3.96632	0.970977	0.0163826	0.55111	382.811	5.10057	0.963669	0.0157984	0.38758	437.267	56.7034	0.80988	0.00392083	0.277637	1713.08	61.8061
456988		20130213	2	60	158.4	61.4	24.4714	77.1	0.486742	20130213	12.35	0.836	-1.1	0.4	3.95	0.857	0.5	2.3	1182.46	68.5739	0.0523858	3.15481	0.956496	4.74357	0.679886	0.0150842	0.481067	66.118	5.41071	0.62858	0.0150332	0.467293	65.7249	18.7152	0.683056	0.00427369	0.336738	248.391	21.2811	0.632991	0.0042797	0.325663	246.898	74.8603	0.684163	0.00154131	0.223707	962.603	85.1865
140073560		20160616	2	35	166.1	58.5	21.2039	80.9	0.487056	20160616	12.31	0.89	-0.7	-0.6	3.03	0.637	-1.5	-1.2	1222.79	58.3937	1.13661	7.7852	0.523195	1.6194	0.828271	0.033624	0.623057	92.4067	2.48639	0.725345	0.0296706	0.578635	90.9921	6.0346	0.839073	0.00955257	0.467035	350.383	9.40193	0.738535	0.00839671	0.427851	344.751	23.8395	0.841225	0.00287468	0.330101	1365.01	37.2925
144541	3	43237	2	53	162.5	53.5	20.2604	79.16	0.487138	43237	11.41	0.909	-0.5	0.4	3.17	0.647	-1.5	-0.5	1209.16	125.796	1.16555	3.86584	1.35034	1.01692	0.970834	0.0349519	0.722723	87.6485	1.55683	0.952939	0.0320247	0.693932	84.765	3.63095	0.974744	0.0158377	0.583548	336.682	6.03193	0.955439	0.0126009	0.547873	324.973	14.0883	0.97587	0.0103062	0.439399	1319.69	24.0402
423947	3	42598	2	52	164.2	53.8	19.9543	79.99	0.48715	42598	14.31	0.993	0.2	0.9	3.39	0.676	-1.2	-0.3	1247.08	211.867	1.38813	5.0594	1.68924	1.43392	0.972909	0.0499059	0.702214	105.363	2.81418	0.946669	0.0438016	0.664377	104.696	5.48009	0.974953	0.0350881	0.573044	409.118	11.2272	0.948506	0.0307604	0.539671	406.298	21.7447	0.975562	0.0310689	0.465137	1612.76	45.294
180002368	3	20200207	2	63	164.2	61.3	22.736	80	0.487211	20200207	11.66	0.797	-1.6	-0.3	4.307	0.77	-0.6	0.8	1229.41	120.12	0.880832	4.22394	1.24964	7.08655	0.76798	0.0143855	0.479787	98.5185	8.05238	0.736255	0.0138461	0.452703	96.8817	28.3643	0.773455	0.00744379	0.349925	377.966	32.1683	0.742873	0.00749433	0.422447	182.852	31.0494	0.77046	0.00300342	0.30168	718.2	37.4623
510388	3	20130514	1	45	172.2	71.6	24.1461	83.9	0.487224	20130514	12.79	0.857	-1.1	-0.5	3.47	0.699	-1.2	-0.5	1226.74	63.3367	0.13671	3.45495	0.587973	4.56667	0.629299	0.0180785	0.499957	95.6641	4.42358	0.644794	0.0180157	0.503989	95.5646	18.0209	0.633102	0.00503738	0.350034	363.179	17.2747	0.651948	0.00501926	0.35495	362.889	71.7771	0.634176	0.00170362	0.234175	1415.05	68.6186
510388	3	20190808	1	51	172.2	71.6	24.1461	83.9	0.487224	20190808	9.71	0.684	-2.2	-0.8	2.79	0.568	-2.5	-0.7	1199.18	70.5982	0.303676	4.05135	0.891492	5.78034	0.615907	0.0146401	0.46374	76.1674	7.63333	0.494552	0.0135581	0.442404	75.0814	22.6214	0.621309	0.00427323	0.32207	288.111	29.8178	0.502456	0.00405504	0.302917	283.812	90.1244	0.623097	0.00162576	0.210427	1118.69	118.922
130092454		20171211	2	62	163.1	67.6	25.412	79.5	0.487431	20171211	18.1	1.243	2.4	3.4	4.27	0.952	1.4	3.5	1284.49	68.5709	0.273583	3.336	0.369612	3.37461	0.735437	0.0194637	0.533252	145.036	4.0979	0.679695	0.0185798	0.520317	144.402	13.4319	0.742803	0.00605177	0.386823	556.974	16.3512	0.687714	0.0060862	0.371457	554.494	53.8793	0.744419	0.00260115	0.266068	2184.22	65.7016
130033332	3	20130311	2	49	168.6	62.3	21.9166	82.2	0.487544	20130311	14.21	0.849	-1.1	-0.4	3.72	0.724	-1	0	1171.21	47.9561	0.20045	3.40594	0.955602	2.16153	0.708026	0.0314976	0.579929	56.9935	3.02652	0.591729	0.0283667	0.547107	56.3913	8.12723	0.722251	0.00838812	0.421733	213.065	11.777	0.598181	0.00752665	0.381144	441.18	36.848	0.763681	0.00241949	0.282898	1735.6	49.8003
533399	3	20190212	2	55	157.1	61.6	24.9591	76.6	0.487588	20190212	15.64	1	0.1	0.5	4.01	0.688	-1.3	-0.4	1198.04	40.1187	0.571973	4.19929	0.574563	1.01843	0.802675	0.0571004	0.694513	73.3108	0.796296	0.84742	0.0622657	0.717665	73.179	3.59029	0.821848	0.016006	0.536173	276.135	2.7037	0.867319	0.0178311	0.564794	275.68	13.6978	0.829256	0.00456689	0.379262	1072.35	10.2673
130034849		20170324	2	53	158.3	62.7	25.0211	77.2	0.487682	20170324	9.17	0.763	-1.8	-0.7	3.03	0.612	-1.8	-0.9	1189.84	54.8362	0.52654	4.18083	0.873063	1.98681	0.788213	0.0313619	0.598798	69.8063	3.26481	0.648839	0.0251352	0.531517	68.7895	7.39028	0.800134	0.00870467	0.444477	262.188	12.499	0.658761	0.00692154	0.37928	258.21	29.0972	0.803202	0.00276235	0.306338	1015.12	49.653
130162274	3	20161028	1	35	179.9	75	23.1739	87.8	0.488049	20161028	10.86	0.93	-0.3	-0.1	3.55	0.0761	-0.4	-0.1	1256.02	75.0565	0.156253	3.51538	0.571682	3.51102	0.780604	0.0173148	0.526194	121.323	4.81127	0.687468	0.0151878	0.487032	120.055	13.7404	0.786583	0.00545706	0.377624	463.962	19.0425	0.692385	0.00465499	0.351982	330.61	54.1164	0.69917	0.00207497	0.251073	1303.88	73.0243
412708	3	20150514	1	60	176.6	66.6	21.3547	86.2	0.488109	20150514	15.1	1	0.1	0.5	3.74	0.705	-1.1	-0.2	1238.23	88.7636	2.83372	19.6843	0.692022	4.68006	0.654831	0.0172471	0.497269	99.9948	4.97599	0.628835	0.0170528	0.48331	99.8147	18.4576	0.661533	0.00515187	0.356606	381.114	19.7382	0.633766	0.00501157	0.345102	380.315	73.785	0.662368	0.00198523	0.239206	1485	78.4771
120114384	3	41835	1	52	165.8	58.9	21.4263	80.94	0.488179	41835	6.44	0.691	-2.1	0.1	2.27	0.447	-3.8	-0.5	1116.29	150.84	1.48482	5.28603	1.04806	0.818226	0.982326	0.0915253	0.79044	48.9055	2.85123	0.932844	0.0873406	0.72903	44.3719	3.01511	0.984253	0.0547205	0.666918	186.954	11.4143	0.93489	0.0527686	0.527015	206.408	12.7784	0.966077	0.00379392	0.410517	815.418	18.8203
150136248	3	20171205	2	49	167.1	69.6	24.9262	81.6	0.48833	20171205	12.77	0.89	-0.7	-0.1	3.28	0.733	-0.7	-0.1	1246.79	60.9251	0.664734	4.90083	0.407236	2.02895	0.809661	0.0287768	0.608087	111.697	2.72314	0.735203	0.0258555	0.564372	111.041	7.64868	0.820655	0.00798476	0.448904	425.938	10.4476	0.746034	0.00738847	0.409091	423.23	30.2803	0.823234	0.00264197	0.311337	1662.26	41.4113
499702		20171106	2	54	163.2	59.8	22.4523	79.7	0.488358	20171106	18.53	1.07	0.7	1	5.07	0.899	0.4	1.4	1179.09	67.9789	0.973312	7.21612	1.01889	4.23529	0.680288	0.0177223	0.50184	62.6982	3.63798	0.727504	0.0185411	0.514819	62.8303	16.4811	0.687742	0.00489012	0.352831	235.679	14.1529	0.733784	0.00508737	0.373326	440.241	48.0746	0.711447	0.0023356	0.249757	1722.27	55.6143
245762		20190805	2	67	157.8	60.7	24.3767	77.1	0.488593	20190805	8.67	0.667	-2.6	-0.5	3.18	0.706	-0.9	1.2	1100.16	67.9871	0.564407	3.84743	0.706181	3.3335	0.74891	0.0235144	0.552814	26.1895	4.44097	0.6592	0.0194609	0.501571	25.3299	12.906	0.760166	0.00737114	0.401187	95.5458	17.4985	0.668737	0.00573094	0.351951	92.0665	51.5334	0.762535	0.00309932	0.278243	364.035	70.0675
120073328		20200622	1	59	175.8	77.5	25.0763	85.9	0.488623	20200622	15.1	0.976	-0.1	0.4	3.49	0.672	-1.4	-0.5	1218.28	56.8561	0.362333	3.18197	0.598346	2.79076	0.728553	0.0238658	0.556865	89.3567	4.36239	0.57049	0.0192265	0.495319	88.3384	10.6087	0.738807	0.0066301	0.401223	338.094	16.9218	0.578557	0.00547896	0.350367	334.132	41.8003	0.74216	0.00213312	0.272071	1314.9	67.0693
150058889		20150512	1	53	174.9	75	24.5178	85.5	0.488851	20150512	15.43	1.008	0.2	0.5	3.78	0.736	-0.9	-0.1	1240.88	69.6442	0.349122	3.81415	0.552651	4.99309	0.644107	0.0164356	0.498422	106.767	4.74621	0.653594	0.0172344	0.498777	106.684	19.8473	0.649949	0.00478058	0.352909	406.605	18.5941	0.664453	0.00495166	0.35575	406.334	79.0088	0.654035	0.0017102	0.234633	1587.61	74.5878
120040623	3	20170203	2	58	166.7	65	23.3906	81.5	0.488902	20170203	12.79	0.857	-1.1	-0.5	3.47	0.699	-1.2	-0.5	1226.74	63.3367	0.13671	3.45495	0.587973	4.56667	0.629299	0.0180785	0.499957	95.6641	4.42358	0.644794	0.0180157	0.503989	95.5646	18.0209	0.633102	0.00503738	0.350034	363.179	17.2747	0.651948	0.00501926	0.373819	121.018	61.449	0.493882	0.00246444	0.250462	459.606	49.1044
150068471	3	43607	2	47	154.6	57.3	23.9737	75.59	0.488939	43607	11.58	0.941	-0.2	0	3.65	0.757	-0.4	0	1241.38	170.299	2.71697	11.0065	1.40417	1.37244	0.94206	0.0357681	0.663748	91.8044	2.56159	0.888327	0.0299734	0.621053	89.1313	5.27022	0.946115	0.0159723	0.516801	352.696	10.058	0.89367	0.0121856	0.479266	342.095	20.6933	0.947861	0.0108666	0.393728	1380.54	40.3207
557320	3	20150430	1	45	178.5	79.7	25.0139	87.3	0.489076	20150430	10.08	0.783	-1.6	-0.3	2.64	0.566	-2.2	-1.1	1244.76	56.5918	-0.0237261	3.42823	0.345487	3.73878	0.6328	0.0223858	0.510875	109.435	3.58871	0.64582	0.0224363	0.519276	109.143	14.4623	0.640469	0.00623947	0.361781	417.034	13.8653	0.653851	0.00629422	0.373022	415.812	57.6955	0.6404	0.00219068	0.240339	1626.88	55.2419
160090303	3	20190621	2	51	169.7	64.8	22.5015	83	0.489098	20190621	20.04	1.203	1.8	1.8	5.51	1.052	1.7	2.6	1301.59	75.0274	0.159483	3.07907	0.530508	5.49675	0.601859	0.0215888	0.496218	157.44	4.82614	0.649464	0.0218822	0.503129	157.531	22.2773	0.60705	0.00842807	0.36055	608.28	19.2549	0.659651	0.00842411	0.366739	234.247	44.942	0.733397	0.0019545	0.260076	911.212	51.9364
366833	3	20190318	1	51	177.5	67.4	21.3926	86.9	0.489577	20190318	14.78	1.075	0.8	1	4.71	1.059	1.7	2.5	1257.51	67.016	0.570075	4.22614	0.407526	4.28455	0.656316	0.0180035	0.500764	119.738	3.69116	0.70365	0.019117	0.526302	119.293	16.7466	0.664043	0.00521166	0.356115	457.738	14.3605	0.711752	0.00553381	0.377048	456.152	66.3286	0.667058	0.00193245	0.242383	1789.02	57.1619
160165380	3	43347	2	57	162.5	54.9	20.7905	79.56	0.4896	43347	10.53	0.826	-1.2	0.2	3	0.622	-1.7	-0.3	1263.45	121.766	0.973694	3.59405	1.26799	1.03283	0.962525	0.0421237	0.711233	121.619	1.30877	0.951098	0.0395397	0.704859	119.084	3.76152	0.967004	0.0253808	0.563838	470.403	4.86608	0.955872	0.0230252	0.565044	460.405	14.7333	0.968198	0.0202496	0.434426	1848.88	19.4181
130037037		20170331	2	42	155	60.6	25.2237	75.9	0.489677	20170331	16.12	1.124	1.7	1.7	4.5	0.956	1.8	2.3	1257.89	71.6775	0.141501	3.70963	0.524988	4.93717	0.666573	0.0149439	0.491103	121.187	4.4093	0.695958	0.0155023	0.489419	121.494	19.4603	0.673191	0.00439517	0.343467	463.626	17.3395	0.702455	0.00453461	0.346191	464.769	77.6495	0.675547	0.00165956	0.22805	1812.58	69.3615
537987	3	20200729	2	60	164.9	62.4	22.9479	80.8	0.489994	20200729	12.01	0.856	-1.1	-0.3	3.39	0.69	-1.3	-0.3	1178.15	61.5518	0.439304	3.81785	0.996694	3.80171	0.677951	0.0195632	0.510583	62.2547	3.72941	0.684952	0.0196668	0.515137	62.6293	14.8336	0.685	0.00536197	0.36314	233.454	14.5383	0.691804	0.00541646	0.400023	63.9779	32.6006	0.691587	0.00287544	0.294125	247.581	42.9216
130169604	3	20190326	2	54	160	63	24.6094	78.4	0.49	20190326	9.82	0.797	-1.5	-0.3	3.11	0.603	-1.9	-0.9	1161.81	49.8128	-0.371946	4.44776	0.986615	1.76581	0.772913	0.0384033	0.616353	51.7858	2.02574	0.735544	0.0359482	0.5996	51.9863	6.62279	0.787114	0.0105853	0.459158	192.697	7.6968	0.748476	0.00993682	0.447236	193.348	26.1282	0.789873	0.00309251	0.320943	744.308	30.095
476477	3	20181217	2	55	165.8	67.6	24.5911	81.3	0.49035	20181217	11.47	0.916	-0.1	0.8	3.3	0.709	-0.9	0.5	1242.23	56.0127	0.220175	3.22165	0.330248	1.64678	0.830407	0.0300209	0.614181	108.024	2.70329	0.717968	0.0245029	0.560895	107.466	6.1807	0.841443	0.00826237	0.450113	411.98	10.4865	0.727631	0.00667494	0.403313	409.702	24.4257	0.843101	0.00254574	0.311606	1606.53	41.8114
464817	3	42460	2	40	154.5	51	21.3655	75.77	0.490421	42460	10.67	0.922	-0.4	-0.2	2.57	0.603	-1.9	-1.4	1303.6	176.783	0.936721	3.09472	1.6273	0.790082	0.978018	0.0935885	0.777276	134.268	1.97872	0.944446	0.0865172	0.739552	134.762	2.83356	0.981039	0.0718521	0.657736	522.838	7.91833	0.946417	0.0666411	0.61967	524.59	11.1569	0.981736	0.0656604	0.545814	2065.05	32.1167
241311	3	20151021	1	59	171.8	70.1	23.7504	84.3	0.490687	20151021	10.04	0.771	-1.8	-0.9	2.57	0.559	-2.3	-1.4	1219.23	55.9182	0.339781	3.31636	0.562364	2.32979	0.768491	0.02606	0.574763	89.9563	2.64077	0.735688	0.0255382	0.563537	89.58	8.7514	0.779174	0.00711331	0.420139	341.125	9.99493	0.745994	0.00684172	0.409015	339.735	34.537	0.780894	0.00219638	0.287964	1327.75	39.241
536655	3	20180213	2	72	164.4	61.9	22.9027	80.7	0.490876	20180213	14.12	1.119	1.3	1.6	3.42	0.859	0.5	1.1	1343.22	73.8392	0.337576	3.748	0.701759	1.75063	0.810319	0.0716107	0.665622	191.597	1.97486	0.775	0.0693352	0.651363	191.84	6.83208	0.823876	0.038716	0.521293	745.451	7.89189	0.786382	0.0347646	0.347081	156.476	49.7683	0.757124	0.00227596	0.262304	618.197	79.7056
530437	3	20130225	2	65	159.7	58.9	23.0943	78.4	0.49092	20130225	11.61	0.738	-2.1	-1.3	4.22	0.692	-1.2	-0.5	1161.84	33.0727	0.676301	5.33168	0.992069	1.11762	0.693844	0.0680668	0.670949	50.0607	1.24026	0.652136	0.0675493	0.661689	49.6407	3.88889	0.721711	0.0190477	0.514958	186.017	4.45671	0.673564	0.0184398	0.39896	308.627	31.3972	0.782032	0.00258635	0.294549	1216.47	43.3985
414584	3	20140523	1	43	178.8	82.3	25.7433	87.8	0.491051	20140523	12.58	0.833	-1.3	-0.7	4.25	0.826	-0.2	0.4	1242.86	57.4635	0.772605	6.61918	0.374025	2.95499	0.663625	0.028116	0.550385	106.769	3.92121	0.549383	0.0260537	0.524527	105.87	11.4606	0.673336	0.00798981	0.397063	406.083	15.2621	0.560109	0.00729913	0.376132	402.427	45.7464	0.675006	0.0026175	0.268563	1586.28	61.1136
120085400	3	20200715	2	68	155.9	60.2	24.7688	76.6	0.491341	20200715	11.89	0.836	-1.2	0.7	3.26	0.683	-1.1	1	1139.88	80.9534	0.830037	3.8224	0.951537	3.63562	0.819923	0.0173131	0.525536	45.5768	3.84439	0.812922	0.0161741	0.506534	46.516	14.5507	0.820375	0.00515694	0.371236	169.875	15.1769	0.815974	0.00482614	0.358863	173.652	57.8546	0.821544	0.00199176	0.255064	656.211	60.3825
225329	3	20150522	2	50	164.6	67.1	24.7664	80.9	0.491495	20150522	11.48	0.948	-0.2	0.3	3.47	0.774	-0.3	0.4	1243.79	74.793	-0.0678554	3.17591	0.620027	4.44874	0.740781	0.0147518	0.491011	111.702	3.90067	0.765614	0.0158544	0.511998	111.765	17.2756	0.749092	0.00450109	0.348863	426.017	15.17	0.77282	0.00472316	0.367437	426.19	68.9109	0.750895	0.00179366	0.236823	1664.02	60.7197
144541	3	43881	2	55	162.5	53.5	20.2604	79.87	0.491508	43881	11.08	0.924	-0.4	0.7	3.1	0.655	-1.4	-0.2	1226.28	138.562	1.30455	4.41627	1.44958	1.1014	0.96844	0.0385104	0.718894	95.1098	1.48571	0.955598	0.0348745	0.697359	92.8464	4.04825	0.97178	0.020581	0.581991	367.008	5.63929	0.958732	0.0168296	0.557946	357.844	15.9182	0.972669	0.0151157	0.448737	1441.47	22.43
130127206	3	20130830	1	51	176.9	71	22.6883	87	0.491803	20130830	8.1	0.673	-2.3	-0.3	2.39	0.501	-2.8	-0.8	1142.01	65.8307	0.241063	2.92613	0.970832	3.94324	0.710698	0.0167265	0.510704	43.3204	4.18763	0.690029	0.0162463	0.48937	43.1143	15.2162	0.720014	0.00471745	0.363775	160.401	16.4054	0.695401	0.00459671	0.346322	196.992	61.0611	0.655153	0.00178039	0.246243	772.5	73.8321
180119073	3	20180912	2	77	164.7	61.5	22.6719	81	0.491803	20180912	11.81	0.842	-1.2	-0.5	3.5	0.731	-0.9	-0.1	1207.7	161.274	1.41594	4.46276	1.47314	0.87172	0.97911	0.0431116	0.744981	84.4216	2.36118	0.941766	0.0349952	0.676046	80.4082	3.09446	0.981971	0.025111	0.603189	325.67	9.30353	0.944153	0.0176678	0.441609	82.8292	21.3169	0.833267	0.00330626	0.345535	319.728	29.5689
120031137		20140814	1	46	180.7	84.1	25.7561	88.9	0.491976	20140814	17.35	1.11	1	1.2	4.73	0.803	-0.3	0.3	1272.06	76.1382	0.0972288	3.50107	0.556334	6.8119	0.573362	0.0131179	0.441122	132.851	6.2965	0.603771	0.0135009	0.468676	132.738	27.219	0.579996	0.00420509	0.303563	509.416	25.2027	0.608811	0.00431704	0.322778	508.845	109.261	0.580975	0.00179012	0.200468	1994.7	100.932
130040561		20190405	2	43	158.9	61.2	24.2384	78.2	0.492133	20190405	15.2	1.044	0.7	0.7	3.45	0.753	-0.5	0	1161.53	129.808	0.62976	2.02716	1.13648	10.0833	0.907972	0.0486111	0.39623	64.0833	9.44	0.885819	0.0464	0.452	63.96	40.625	0.913259	0.0451389	0.283616	241.625	37.36	0.885751	0.04	0.275922	242.32	160.375	0.913715	0.0416667	0.195573	944.667	142.6
130037891	3	20170317	2	51	159.6	60.5	23.7514	78.6	0.492481	20170317	11.32	0.802	-1.4	-0.6	3.74	0.795	-0.1	0.6	1206.78	65.7091	0.784937	5.64834	0.81953	2.18167	0.822724	0.0239383	0.588931	81.8633	2.78437	0.765624	0.0221053	0.559703	81.1231	8.27722	0.831871	0.00675617	0.43096	310.034	10.7888	0.772486	0.0061965	0.406296	306.921	32.94	0.833527	0.00214691	0.298549	1205.79	42.8919
507694	3	20181011	2	58	159.6	63	24.7329	78.6	0.492481	20181011	10.27	0.783	-1.6	-0.1	2.45	0.521	-2.6	-1.2	1138.31	60.3036	0.683402	4.85589	0.952286	4.32438	0.622815	0.019297	0.484907	40.3967	4.21667	0.622861	0.0197328	0.497672	39.791	16.8512	0.627669	0.00545272	0.338644	149.189	16.2264	0.632615	0.00564236	0.356008	147.02	67.1494	0.628951	0.0018669	0.22585	572.943	64.3674
476674	3	20150120	2	53	162.8	62.6	23.6192	80.2	0.492629	20150120	11.32	0.802	-1.4	-0.6	3.74	0.795	-0.1	0.6	1206.78	65.7091	0.784937	5.64834	0.81953	2.18167	0.822724	0.0239383	0.588931	81.8633	2.78437	0.765624	0.0221053	0.559703	81.1231	8.27722	0.831871	0.00675617	0.43096	310.034	10.7888	0.772486	0.0061965	0.415848	338.863	25.3059	0.788571	0.00304414	0.328173	1328.04	35.1665
130168663		20160617	1	59	177.8	76.3	24.1358	87.6	0.492688	20160617	10.21	0.758	-1.9	-1	3.07	0.676	-1.4	-0.5	1147.79	64.69	0.220159	3.13848	0.983604	4.41527	0.668879	0.0172647	0.496259	45.9251	3.82805	0.708422	0.0185239	0.510655	45.8957	17.1947	0.676615	0.00486273	0.353616	170.806	14.8668	0.716032	0.00517839	0.360229	170.702	68.4797	0.677497	0.00174874	0.235256	657.965	59.1395
393421		20180111	2	57	160.5	63.3	24.5727	79.1	0.492835	20180111	9.34	0.682	-2.5	-0.9	2.81	0.581	-2.1	-0.7	1160.4	58.8079	0.58315	5.63092	1.03504	2.62292	0.749506	0.0243497	0.553728	52.0554	4.15615	0.600916	0.0205063	0.501319	50.9922	9.97841	0.759387	0.00681744	0.39491	193.795	16.2331	0.607217	0.00563398	0.349138	189.594	39.5282	0.761338	0.00213083	0.272737	747.502	64.4208
120129913		20151022	1	46	174.7	75.6	24.7706	86.1	0.492845	20151022	15.38	0.845	-1.2	-0.6	3.54	0.659	-0.9	-0.9	1171.97	55.5923	0.30704	3.90317	0.977663	4.02067	0.591918	0.0212543	0.502011	57.6067	4.3882	0.546591	0.0210994	0.503477	57.0916	15.7716	0.596008	0.00581402	0.354873	215.184	17.1092	0.554044	0.00575627	0.357621	213.338	62.585	0.598997	0.00184043	0.235543	830.937	67.9845
400521		20190114	2	62	161.7	60.3	23.062	79.7	0.492888	20190114	13.53	0.916	-0.6	-0.1	4.3	0.815	-0.2	0.6	1210.27	147.658	1.48497	5.91469	1.44091	1.62002	0.958957	0.0278108	0.670055	87.0432	2.04233	0.946296	0.0259534	0.656746	84.469	6.07068	0.962446	0.0141716	0.525821	334.623	7.75998	0.950044	0.0126316	0.39104	324.945	35.7889	0.819166	0.00225246	0.281958	1269.32	46.0634
130182911		20160805	2	72	165.5	69.4	25.3375	81.6	0.493051	20160805	12.5	0.732	-2.1	0.1	2.82	0.598	-1.9	0.3	1166.44	78.3533	1.30739	12.2112	1.04323	3.05832	0.811053	0.0180135	0.538995	57.6463	3.11968	0.806306	0.0180834	0.5423	56.7032	11.886	0.817014	0.00504471	0.384906	216.037	12.1537	0.812001	0.00506394	0.39429	212.47	46.8696	0.820205	0.00168513	0.264298	836.944	48.167
130042909	3	20130327	2	48	167.5	65.3	23.2747	82.6	0.493134	20130327	5.83	0.57	-2.6	-0.5	2.69	0.556	-2.6	0.3	1221.83	163.994	1.68977	7.67081	1.41608	0.869048	0.978924	0.0305612	0.729866	93.131	0.853129	0.979139	0.0313323	0.740875	93.3602	3.10025	0.981744	0.0154098	0.585555	358.725	3.05939	0.981796	0.0151846	0.504626	710.317	21.5635	0.845767	0.0225066	0.414243	2810.67	32.0069
202849	3	20181213	1	82	177.6	85.8	27.202	87.6	0.493243	20181213	15.75	0.932	-0.4	0.5	5.73	0.934	0.7	2.3	1130.54	102.627	0.968622	5.27866	1.04013	5.84146	0.778817	0.0159211	0.498471	43.4795	6.62222	0.746894	0.0141506	0.471785	42.7478	23.031	0.785856	0.00665066	0.360222	162.583	26.5378	0.750969	0.00534321	0.338536	159.512	92.2195	0.788189	0.00358467	0.252854	629.237	107.104
482755		20150907	2	48	166.4	59.4	21.4526	82.1	0.493389	20150907	12.87	0.866	-0.3	0	5.08	0.911	0.9	1.8	1286.97	156.212	1.78738	6.99136	1.34164	1.1028	0.956831	0.047213	0.728137	128.451	1.79532	0.929175	0.0414358	0.684727	127.809	4.06274	0.961505	0.0299656	0.593438	496.997	6.91862	0.933959	0.0253673	0.385475	363.592	39.0161	0.771116	0.00203179	0.271542	1417.45	44.4547
400386	3	20161014	2	54	166.1	68.4	24.7923	82	0.493679	20161014	10	0.827	-1.2	0	3.49	0.636	-1.6	-0.4	1200.42	54.0493	0.0380795	3.25057	0.748253	2.47039	0.733608	0.0263253	0.567188	76.3743	3.61736	0.615266	0.0224441	0.523597	75.8534	9.60987	0.738488	0.00725589	0.411663	287.893	14.0388	0.623531	0.0062474	0.368768	285.851	38.2276	0.740154	0.00227753	0.283453	1119.08	55.8146
495899	3	43605	2	46	160.8	57.5	22.238	79.41	0.493843	43605	15.63	1.009	0.2	0.5	4.78	0.967	1	1.7	1226.35	61.7851	0.474941	4.24742	0.572304	4.05651	0.640806	0.0197237	0.506374	94.6298	4.81394	0.57651	0.0187711	0.488737	93.968	15.8362	0.647978	0.00546274	0.361933	358.954	18.9565	0.582013	0.00528025	0.651865	718.857	11.5386	0.959706	0.115565	0.578966	2884.88	15.8565
557302	3	20180524	2	49	165.8	67.4	24.5183	81.9	0.493969	20180524	12.08	0.802	-1.5	-0.6	3.22	0.704	-1.1	-0.2	1265.16	74.9695	0.438959	3.86873	0.529133	3.49338	0.768944	0.0177963	0.519809	128.017	5.54915	0.636012	0.0149617	0.484177	126.275	13.4037	0.778501	0.00546605	0.378043	490.813	21.7413	0.643644	0.00449741	0.343863	483.821	53.3757	0.780622	0.00230861	0.257736	1920.42	86.6933
140106152		20171019	2	67	166.8	60.4	21.7093	82.4	0.494005	20171026	16.48	0.959	-0.2	0.3	3.53	0.69	-1.3	-0.3	1222.61	76.9864	3.1969	25.0352	0.710708	3.09565	0.72491	0.0223523	0.538709	90.0924	4.00982	0.637117	0.020776	0.506986	88.8773	11.9902	0.732621	0.00625709	0.391175	342.278	15.7054	0.643263	0.00578025	0.442255	355.345	25.9189	0.888652	0.00396592	0.320328	1394.85	29.9268
170042325	3	20190227	2	34	169.8	64.1	22.2322	83.9	0.494111	20190227	10.17	0.813	-1.1	0	2.85	0.604	-2.1	-0.4	1196.32	162.475	1.6446	6.28798	1.43244	1.54764	0.963501	0.0285809	0.689062	77.913	3.07273	0.925698	0.0220443	0.629543	75.8432	5.90848	0.965887	0.0142063	0.549941	299.215	12.2735	0.927207	0.00977158	0.377961	381.518	52.8271	0.751334	0.00206921	0.260916	1507.26	58.8757
477774	3	20121112	1	53	175.2	69.3	22.5769	86.6	0.494292	20121112	8.24	0.741	-2	-0.7	2.67	0.545	-2.4	-1.4	1179.1	49.4222	0.234072	3.87965	0.919849	1.68197	0.782616	0.0341036	0.608966	62.093	2.56343	0.668744	0.0281685	0.552754	61.2794	6.30442	0.79373	0.00922005	0.449505	233.108	9.69543	0.682398	0.00765257	0.383183	163.266	49.3568	0.718974	0.00192925	0.260555	634.021	48.5625
553354	3	20170721	1	65	179.7	85.6	26.508	89	0.49527	20170721	9.86	0.74	-2	-1.7	3.71	0.718	-1	-0.7	1122.48	54.744	-0.207091	3.1265	0.859953	3.4252	0.633065	0.0229956	0.52893	32.5593	2.92529	0.68503	0.0241385	0.548606	32.8243	13.161	0.644698	0.00646969	0.381272	119.036	11.211	0.695953	0.00687822	0.395955	120.024	52.5065	0.646976	0.00237821	0.260399	455.637	44.5846
542997		20200512	2	66	160.3	65.8	25.607	79.4	0.495321	20200512	7.18	0.65	-2.8	-0.7	2.69	0.57	-2.2	-0.4	1135.29	66.6882	0.759744	4.37384	0.92122	2.3912	0.826374	0.0230255	0.575887	40.7199	3.65019	0.733176	0.0193921	0.508995	40.1012	9.05093	0.834877	0.00643957	0.4198	150.888	14.3197	0.736953	0.00540898	0.361305	148.408	35.9375	0.836014	0.00219574	0.291556	580.454	57.0371
467976	3	20160812	1	44	179.2	69.2	21.5491	88.8	0.495536	20160812	10.09	0.843	-1.2	-0.4	3.56	0.657	-1.5	-0.6	1205.93	56.9866	0.0260009	3.10966	0.679239	2.12593	0.794655	0.0276255	0.58735	80.4842	2.53704	0.759848	0.0253002	0.55985	80.5046	8.09718	0.802722	0.00764156	0.430069	304.63	9.70949	0.768339	0.00694244	0.308242	299.727	95.5991	0.508662	0.00176953	0.199091	1178.64	105.393
190665	3	20170209	1	55	175.9	70.9	22.9147	87.2	0.495736	20170209	14.54	0.924	-0.5	-0.1	4.11	0.79	-0.5	0.1	1262.43	49.0355	0.562545	4.80431	0.128244	2.15937	0.697173	0.0324135	0.587004	122.934	2.39876	0.661434	0.0308912	0.570018	122.594	8.09097	0.712234	0.00881614	0.432468	469.828	9.11433	0.673685	0.00839253	0.345271	225.917	72.2398	0.645307	0.00188477	0.233971	875.809	75.166
120133022	3	20121019	1	55	177.5	64.2	20.3769	88	0.495775	20121019	13.48	0.915	-0.6	-0.1	3.73	0.67	-1.4	-0.6	1227.57	54.0315	0.168491	3.0622	0.43573	3.43782	0.630622	0.0231451	0.52297	95.4577	3.94801	0.573227	0.0221442	0.512292	94.9801	13.3308	0.639455	0.00637245	0.369809	361.582	15.2773	0.584634	0.00609633	0.367552	359.922	52.8423	0.642146	0.00207512	0.247449	1407.12	60.2291
150066499	3	43599	2	55	163.5	66.3	24.8015	81.13	0.496208	43599	12.98	0.908	-0.5	0.5	3.64	0.803	0	1.2	1204.64	139.796	3.8716	21.9235	1.23757	0.9576	0.947785	0.0376563	0.719827	73.3904	1.46242	0.914667	0.0366152	0.69766	70.9167	3.4368	0.953872	0.0121408	0.572577	278.557	5.54248	0.920022	0.0114152	0.545239	268.636	13.4648	0.955242	0.00470144	0.432594	1084.19	21.893
479209	3	20140409	1	48	171.9	70.3	23.7905	85.3	0.496219	20140410	12.98	0.965	-0.2	0.2	4.94	1.027	1.5	2.2	1234.94	60.2366	0.0159856	3.83825	0.462842	4.65333	0.582625	0.0191738	0.495582	100.768	3.98849	0.637453	0.0197874	0.503004	101.771	17.8984	0.59553	0.00540791	0.355081	383.841	15.7474	0.639084	0.00560976	0.363551	387.412	71.1232	0.599134	0.00184187	0.237477	1496.1	63.0032
481453	3	43985	2	46	178.3	81.5	25.6363	88.49	0.496298	43985	13.83	0.827	-1.3	-0.7	3.98	0.698	-1.2	-0.5	1240.43	170.974	0.923364	3.66014	1.54589	1.23386	0.975992	0.0435613	0.712441	108.155	2.51913	0.950891	0.0417429	0.681114	107.403	4.64765	0.97794	0.0283885	0.56701	419.334	9.98087	0.952526	0.027456	0.545493	416.557	18.4702	0.978381	0.0238068	0.434861	1652.01	40.0351
428987	2	42891	2	77	150	44.4	19.7333	74.46	0.4964	42893	7.81	0.68	-2.2	-0.2	2.63	0.562	-2.5	0.2	1290.47	162.547	0.912581	4.1007	1.51601	0.838725	0.977786	0.0726961	0.775258	135.27	1.62792	0.956128	0.0630341	0.702473	134.677	3.01225	0.980729	0.0555666	0.649082	526.693	6.27769	0.958996	0.0484642	0.576951	524.147	11.8627	0.981384	0.0494382	0.528841	2077.06	25.1838
130034807		20170310	1	43	182.9	96.5	28.847	90.8	0.496446	20170310	15.82	0.927	17.93	1.046	0.5	0.7	5.33	0.997	1.2	1.8	1231.29	67.7427	1.00181	7.18036	0.598226	4.13616	0.662256	0.0182148	0.50827	98.4993	6.03901	0.513689	0.0158699	0.469281	97.2768	16.2604	0.296056	244.054	31.7293	0.517923	0.00340102	0.286544	243.534	116.879	0.556891	0.00143363	0.192414	946.345	126.207
200003784	3	20200618	1	46	177	68.7	21.9286	87.9	0.49661	20200619	11.02	0.839	-0.8	-0.8	3.59	0.78	-0.1	0.5	1258.99	54.7575	0.583556	7.40492	0.26916	1.98039	0.757331	0.0330005	0.597357	120.433	3.11135	0.613568	0.0276848	0.539906	119.326	7.4923	0.767928	0.0091007	0.445093	459.594	11.8978	0.626402	0.00768738	0.517918	121.248	15.5775	0.770676	0.00525654	0.369947	465.474	16.7046
310034	3	20191226	2	47	165.5	67.5	24.6438	82.2	0.496677	20191226	15.41	0.965	0	0.3	3.89	0.811	0.1	0.6	1223.86	71.1843	1.39359	7.20911	0.685444	2.55522	0.800124	0.0256044	0.570103	92.9083	2.51466	0.79918	0.0263505	0.571918	92.7715	9.80344	0.809728	0.00720819	0.417947	353.451	9.75935	0.806263	0.00727262	0.423905	352.708	38.7335	0.812189	0.00238511	0.287253	1376.69	38.5172
150069917		20190515	2	52	160.4	63.2	24.5645	79.7	0.496883	20190515	13.21	0.872	-0.8	0	3.43	0.695	-1	-0.2	1228.32	50.0377	1.34712	8.61843	0.335589	2.00772	0.704066	0.0393799	0.601364	94.4409	2.23607	0.66387	0.0377903	0.574317	93.5418	7.69189	0.717103	0.0106289	0.439337	359.337	8.6308	0.676124	0.0103099	0.420206	355.868	30.105	0.722512	0.00333746	0.304635	1399.57	34.2508
483722	3	20171011	2	52	161.2	57.8	22.2432	80.1	0.496898	20171011	11.78	0.865	-1	-0.5	3.52	0.658	-1.5	-0.9	1208.41	60.8688	0.0551017	3.16422	0.734565	3.52024	0.705968	0.0202707	0.525758	82.7458	3.56112	0.695363	0.0201509	0.525236	82.3101	13.5762	0.713163	0.00555626	0.370578	312.911	13.8378	0.700306	0.00565048	0.376351	239.476	43.0958	0.810842	0.00215982	0.28135	944.552	62.6809
495796		20170619	2	56	161.4	59.5	22.8407	80.2	0.496902	20170619	5.44	0.546	-3.4	-1	2.24	0.53	-2.9	0	1123.88	63.8974	2.1523	12.9066	0.801176	1.85918	0.828757	0.0339016	0.616691	33.7503	2.38851	0.775419	0.031286	0.583304	32.9631	7.00408	0.838964	0.00930908	0.461932	124.684	9.12654	0.785951	0.00857379	0.361693	341.165	45.6799	0.766017	0.00213089	0.262793	1338.15	61.5568
150052186		20191101	2	64	164	58.1	21.6017	81.5	0.496951	20191101	14.69	0.885	-0.8	-0.2	3.85	0.731	-0.9	0	1212.74	59.2618	0.253097	3.8164	0.658294	3.90641	0.649787	0.0206511	0.513987	85.0891	4.71875	0.573028	0.0189579	0.478519	84.1085	14.8117	0.661795	0.00570336	0.368027	321.754	18.275	0.578812	0.00535899	0.364018	476.495	46.3576	0.779404	0.00203305	0.265982	1871.86	65.2047
150069302	3	43609	1	46	174	72.7	24.0124	86.47	0.496954	43609	11.75	0.777	-1.7	-1.1	3.63	0.652	-1.6	-0.9	1176.3	107.36	2.34799	9.97001	1.22963	0.897202	0.958962	0.038875	0.7045	62.864	1.58796	0.921389	0.0374508	0.67697	60.1534	3.1607	0.964363	0.0124743	0.547937	237.953	6.01058	0.926475	0.0113055	0.523677	227.151	12.2524	0.965787	0.00499202	0.410097	926.739	23.9993
150069962		20170605	2	55	167.8	67.4	23.9373	83.4	0.49702	20170605	8.99	0.654	-2.5	-1.3	2.95	0.63	-1.8	-0.3	1144.52	54.2537	0.20139	3.8666	0.973759	1.47907	0.841297	0.034972	0.63845	43.4335	2.47386	0.729879	0.0278338	0.557513	42.6265	5.50512	0.851768	0.00941612	0.476714	161.447	9.53922	0.738567	0.00751978	0.403289	158.197	21.5153	0.855241	0.00271931	0.335078	621.158	37.7339
120109991	3	20171115	1	53	175.4	67	21.7779	87.2	0.497149	20171115	19.62	1.052	0.6	0.8	6.11	1.112	2.1	3.2	1185.8	69.7173	1.98273	16.6624	0.995054	4.12672	0.674814	0.0198634	0.510214	66.4528	3.7883	0.699493	0.0204906	0.524312	66.7426	16.1278	0.683484	0.00540906	0.364133	250.015	14.5952	0.711468	0.00566942	0.331622	353.642	85.1048	0.626919	0.00178243	0.2184	1386.21	89.0189
170127596	3	43606	2	66	159.8	55	21.5382	79.52	0.497622	43606	12.75	0.877	-0.9	-0.7	4.14	0.765	-0.7	-0.4	1236.69	152.882	2.78237	12.6047	1.29129	1.1917	0.949516	0.0302286	0.687	94.0629	1.51199	0.933502	0.0269352	0.658744	91.4842	4.37398	0.954681	0.012737	0.532007	360.207	5.72664	0.938324	0.0102963	0.512007	278.643	18.842	0.971427	0.00765513	0.409868	1113.57	43.7938
434781	3	20191101	1	65	178	74.2	23.4188	88.6	0.497753	20191101	12.86	0.961	-0.1	0.4	3.9	0.834	0.3	0.8	1252.91	56.6298	0.313652	3.65571	0.291137	2.47632	0.746789	0.0256709	0.564699	116.5	3.28082	0.660928	0.023416	0.530587	115.715	9.38026	0.759658	0.00729051	0.413437	444.403	12.5854	0.673685	0.00649158	0.327775	262.142	86.1398	0.649633	0.00180682	0.215082	1010.54	92.2558
480228	3	20190808	2	74	159.7	62.3	24.4275	79.6	0.498435	20190826	8.22	0.66	-2.4	-0.3	2.53	0.492	-3.3	-0.6	1090.86	49.445	0.614729	4.23093	0.379016	0.619946	0.918179	0.0562475	0.751572	20.7984	0.712418	0.908202	0.0533366	0.727941	20.6291	2.09811	0.929911	0.016056	0.591402	74.4318	2.43028	0.921281	0.0153757	0.569136	73.8453	8.00539	0.933337	0.00460415	0.434171	281.85	9.12309
466075	3	20120822	1	46	176.7	75.1	24.0529	88.1	0.498585	20120822	12.47	0.84	-1.2	-0.6	4.06	0.732	-0.9	-0.3	1240.01	61.2806	0.418147	4.93449	0.416507	3.81579	0.649331	0.0217752	0.516997	105.154	3.71937	0.653623	0.0216567	0.517935	104.551	14.9061	0.657796	0.00599443	0.368028	401.01	14.495	0.662624	0.00606834	0.373274	398.618	59.0626	0.661918	0.00208009	0.250504	1563.76	57.787
120063707		20170828	2	46	158.2	59.5	23.7741	78.9	0.498736	20170828	10.96	0.831	-0.9	-0.7	5.1	3.01	-2.2	-1	1187.54	57.1652	0.589478	3.90384	0.911045	2.53065	0.757283	0.0254331	0.558085	68.0371	3.17561	0.693157	0.023839	0.527407	67.6878	9.62903	0.767055	0.00726847	0.408977	256.273	12.3244	0.700254	0.00668121	0.37833	254.848	38.2694	0.767918	0.00243496	0.277635	993.297	49.1171
130109237	3	20151103	2	60	163.2	60.8	22.8278	81.4	0.498775	20151103	10.5	0.785	-1.6	0.2	2.67	0.567	-2.2	-0.5	1178.67	181.186	1.8735	6.10324	1.34763	1.24277	0.971364	0.0416885	0.727489	64.7891	3.03232	0.930248	0.0374151	0.687987	64.2101	4.6012	0.974253	0.0201449	0.591565	249.79	12.1157	0.932248	0.0172926	0.385179	169.959	48.7184	0.724703	0.00217691	0.266104	660.196	48.3625
533399	3	20180111	2	54	157.1	61.6	24.9591	78.4	0.499045	20180111	8.31	0.773	-1.7	-0.4	2.83	0.549	-2.4	-1.2	1186.01	47.9456	0.153113	3.70252	0.830167	2.04227	0.723967	0.033936	0.595189	66.0791	2.6383	0.643361	0.0302684	0.554607	65.8644	7.5779	0.739432	0.00919362	0.435916	248.69	9.96413	0.657204	0.00833067	0.399485	247.824	30.0127	0.740586	0.00280272	0.302866	961.078	39.135
140157732	3	20171025	1	54	178.9	78.3	24.4648	89.3	0.499162	20171025	21.28	1.259	2.3	2.1	5.8	1.033	1.5	2.3	1378.79	83.3838	0.649864	3.94381	0.903229	2.1146	0.67524	0.13494	0.677096	212.765	2.62	0.575885	0.124518	0.662198	212.609	8.69545	0.690774	0.0942586	0.555038	833.297	10.7505	0.59809	0.0844798	0.536167	832.439	35.4751	0.697627	0.0782703	0.453256	3296.84	43.9695
150082282	3	43250	2	50	155.9	53.1	21.8475	77.83	0.49923	43250	13.29	0.94	-0.4	0	4.05	0.87	0.2	0.8	1208.45	56.3522	0.658688	6.0091	0.682949	3.59524	0.623463	0.022035	0.51423	81.4016	3.60842	0.620655	0.0223282	0.525327	80.8975	13.9355	0.632197	0.00614004	0.363792	307.407	13.8982	0.631625	0.00619173	0.607565	563.569	22.9397	0.963126	0.0814823	0.530958	2254.81	25.6823
130030238	3	20150529	1	55	163.8	59.5	22.1763	81.8	0.499389	20150529	10.54	0.748	-1.9	-1.2	2.59	0.548	-2.4	-1.8	1185.79	51.706	1.50394	6.96316	0.902653	1.33112	0.839815	0.0479244	0.652252	66.6932	1.30599	0.83721	0.0486244	0.656125	65.8271	4.80731	0.855001	0.0132388	0.497964	250.674	4.79435	0.850192	0.0134052	0.401454	309.479	30.5754	0.699101	0.00297049	0.294501	1219.04	36.6516
140098875	3	20181108	2	31	169.8	65.8	22.8218	84.8	0.499411	20181108	6.35	0.62	-2.8	-0.5	1.49	0.389	-4.5	-1.3	1138.61	194.305	1.76979	6.20918	1.22802	2.214	0.95911	0.100389	0.762465	55.785	2.92492	0.946647	0.0979172	0.738791	56.4895	8.76365	0.9611	0.0688384	0.653626	215.462	11.5666	0.949272	0.0682239	0.392744	600.716	60.854	0.823689	0.0130792	0.314175	2382.18	90.9414
150065076	3	43616	1	49	171.4	75.6	25.7336	85.6	0.499417	43616	14.3	0.882	-0.9	-0.3	4.51	0.814	-0.3	0.4	1196.29	175.65	2.35029	10.1952	1.40793	1.68764	0.956849	0.0223756	0.657139	74.2234	2.28629	0.939468	0.0206896	0.639117	71.8886	6.4195	0.95973	0.00987114	0.512791	284.213	8.84857	0.942438	0.0082129	0.48788	274.965	25.441	0.960495	0.00659769	0.381997	1112.01	35.4909
150135553	3	43762	1	43	177.3	79.6	25.3219	88.56	0.499492	43762	15.67	0.942	-0.4	0	3.64	0.62	-1.8	-1.2	1222.45	169.813	2.00229	8.14579	1.45347	1.33604	0.963706	0.0277425	0.690252	88.5159	1.9114	0.947885	0.024263	0.660332	87.0034	4.97566	0.967015	0.013482	0.542148	339.666	7.41346	0.950734	0.010722	0.521195	333.448	19.76	0.967703	0.00957786	0.409986	1331.23	29.7301
454005		20181107	2	52	163.1	57.8	21.728	81.5	0.499693	20181107	9.57	0.741	-2	-1.2	3.31	0.726	-1	-0.1	1230.84	52.8627	0.692931	7.29344	0.397018	2.26335	0.717684	0.0308733	0.578597	97.2879	2.35687	0.705014	0.0303163	0.558352	97.4474	8.39209	0.732981	0.00863147	0.426031	369.008	8.79677	0.718917	0.00841929	0.410737	256.873	26.6059	0.791665	0.00278555	0.314805	999.141	36.0701
140056707	3	20170616	2	35	165.5	67	24.4613	82.7	0.499698	20170616	10.9	0.868	-0.9	-0.8	3.76	0.868	0.6	0.9	1263.8	61.4391	0.960877	6.02312	0.256587	1.68363	0.829678	0.0298095	0.624334	124.849	2.37544	0.759706	0.0253866	0.578086	124.256	6.25731	0.841474	0.00855443	0.468193	477.573	9.09048	0.769675	0.00722728	0.421178	475.16	24.6468	0.844888	0.00270989	0.331311	1868.25	35.9224
414584	3	20151023	1	44	178.8	82.3	25.7433	89.5	0.500559	20151023	12.73	0.841	-1.2	-0.7	4.08	0.797	-0.4	0.2	1229.81	56.9406	0.307843	3.91163	0.482057	3.96989	0.602564	0.0212253	0.511425	96.8423	3.76812	0.618093	0.0215406	0.510052	96.7587	15.3047	0.613381	0.00596138	0.362157	367.875	14.5971	0.626201	0.00613001	0.357216	367.598	60.5993	0.618029	0.0019861	0.239613	1433.77	57.829
414584	3	20190716	1	48	178.8	82.3	25.7433	89.5	0.500559	20190716	13.62	0.902	-0.7	-0.2	4.04	0.767	-0.6	0.1	1223.49	56.9907	0.318701	3.64132	0.557549	4.16667	0.589517	0.0208234	0.505106	92.0341	3.98826	0.60783	0.0209235	0.503578	92.1108	16.1225	0.597843	0.00595988	0.354423	348.957	15.4314	0.615539	0.0059087	0.354526	349.302	63.7543	0.601294	0.00211195	0.238192	1357.28	61.0851
170100717	3	20200803	1	32	178.6	71	22.2585	89.4	0.50056	20200803	10.3	0.834	-1.3	-0.5	3.54	0.648	-1.6	-0.7	1213.75	58.3353	-0.0812453	3.1701	0.602695	2.41969	0.774557	0.0251574	0.563557	86.4209	2.10578	0.807876	0.025961	0.582138	86.6213	9.37017	0.77982	0.00687662	0.410452	326.941	8.00122	0.815839	0.00714517	0.396215	300.53	38.7467	0.697915	0.00264012	0.297869	1178.99	47.5787
130042255		20170314	2	57	162.8	59.5	22.4496	81.5	0.500614	20170314	15.66	1.103	1.2	1.2	3.71	0.837	0.3	0.8	1313.11	75.133	0.221243	4.22418	0.554965	3.10585	0.748647	0.0308799	0.575762	167.558	2.90952	0.7622	0.0308595	0.576067	167.035	12.1912	0.758966	0.0129961	0.428286	648.472	11.386	0.772667	0.0123785	0.446462	152.072	29.5775	0.759359	0.00281209	0.310415	585.432	28.1519
130164803		20161114	2	27	160.4	64.3	24.9921	80.3	0.500623	20161114	14.11	1.088	1	1.3	4.67	0.925	1.1	1.6	1306.5	78.6936	0.307579	2.73071	0.629404	3.12907	0.776293	0.0373639	0.576522	160.959	2.72973	0.802537	0.0381913	0.594612	160.475	12.3358	0.78783	0.0196732	0.438458	622.504	10.7486	0.812669	0.0191314	0.453266	620.371	49.3189	0.791496	0.0142454	0.327674	2451.04	42.9566
140129029	3	20171012	2	52	166.9	60.4	21.6832	83.6	0.500899	20171012	14.2	1.026	0.3	0.7	3.77	0.739	-0.9	-0.1	1208.18	74.3732	1.14425	7.9278	0.886862	4.17485	0.714922	0.0161886	0.502302	82.1525	5.62266	0.615141	0.0144168	0.469544	81.3931	16.1057	0.724515	0.0046503	0.353672	310.924	21.9062	0.624368	0.00429008	0.479555	262.742	19.7103	0.74502	0.00378443	0.334235	1027.07	20.304
310034		20181213	2	46	158.1	59.1	23.6442	79.2	0.500949	20181213	10	0.827	-1.2	0	3.49	0.636	-1.6	-0.4	1200.42	54.0493	0.0380795	3.25057	0.748253	2.47039	0.733608	0.0263253	0.567188	76.3743	3.61736	0.615266	0.0224441	0.523597	75.8534	9.60987	0.738488	0.00725589	0.411663	287.893	14.0388	0.623531	0.0062474	0.395331	407.117	47.6525	0.825471	0.00234456	0.284824	1591.9	51.8873
150163884	3	20171115	2	58	169.3	67.6	23.5848	84.9	0.501477	20171115	11.48	0.948	-0.2	0.3	3.47	0.774	-0.3	0.4	1243.79	74.793	-0.0678554	3.17591	0.620027	4.44874	0.740781	0.0147518	0.491011	111.702	3.90067	0.765614	0.0158544	0.511998	111.765	17.2756	0.749092	0.00450109	0.348863	426.017	15.17	0.77282	0.00472316	0.387612	343.506	41.1444	0.733106	0.00232348	0.275772	1351.92	43.7679
120150364		20191205	2	40	166.9	57.5	20.6422	83.7	0.501498	20191205	11.73	0.893	-0.6	-0.5	2.96	0.653	-0.14	-0.9	1244.75	47.0311	0.0983398	2.90893	0.169379	1.76458	0.757192	0.0340066	0.597674	109.278	2.02244	0.719228	0.0327616	0.594448	108.372	6.48333	0.770123	0.00980228	0.449468	417.16	7.45792	0.733334	0.00947737	0.444474	413.577	25.5875	0.772476	0.00299961	0.307444	1626.31	29.1157
194367	3	20200206	2	59	162.6	64.8	24.5095	81.6	0.501845	20200206	10.38	0.802	-1.4	0.1	3.21	0.711	-0.9	0.7	1216.03	73.5463	0.588196	3.28282	0.817363	2.8756	0.826581	0.0190398	0.542803	91.0821	2.81992	0.827573	0.0195144	0.549113	90.5337	11.1893	0.831958	0.00546627	0.391231	346.02	11.0596	0.831586	0.00547767	0.394242	343.805	44.5333	0.833237	0.00191752	0.26367	1347.44	44.1491
434781		20191101	1	65	172.1	76.9	25.9636	86.4	0.502034	20191101	14.07	0.896	-0.7	-0.1	4.15	0.836	-0.1	1	1189.52	75.1815	1.23474	6.543	1.03087	5.41026	0.644973	0.0153816	0.463702	69.1447	5.82583	0.614828	0.0152778	0.468532	69.59	21.5889	0.648158	0.00446951	0.322954	260.335	23.16	0.620782	0.00443889	0.327775	262.142	86.1398	0.649633	0.00180682	0.215082	1010.54	92.2558
140011593	3	20200723	2	65	168.1	66	23.3565	84.4	0.502082	20200723	11.41	0.909	-0.5	0.4	3.17	0.647	-1.5	-0.5	1209.16	125.796	1.16555	3.86584	1.35034	1.01692	0.970834	0.0349519	0.722723	87.6485	1.55683	0.952939	0.0320247	0.693932	84.765	3.63095	0.974744	0.0158377	0.583548	336.682	6.03193	0.955439	0.0126009	0.429528	134.472	30.0258	0.669682	0.00320277	0.294946	514.736	32.3023
420816	3	20171207	2	79	167.3	69	24.6523	84	0.502092	20171130	5.27	0.543	-3.5	-1	1.94	0.366	-4.7	-1.6	1070.95	45.8935	1.3338	9.13798	0.238712	1.68682	0.724591	0.0481875	0.643477	13.647	1.41012	0.767581	0.0504048	0.653768	13.5816	6.41964	0.738866	0.0134252	0.488164	47.801	5.18182	0.787523	0.0140994	0.49631	47.6581	25.4264	0.742925	0.00418591	0.350169	178.834	20.3786
212509	3	20150605	1	39	178.8	77.7	24.3045	89.8	0.502237	20150605	15.52	1.002	0.1	0.3	4.57	0.808	-0.3	0.2	1250.65	61.6871	0.00162867	3.31843	0.380814	4.62697	0.607799	0.0179	0.48256	114.68	5.15945	0.5665	0.0171265	0.481536	114.357	18.0567	0.616664	0.00517076	0.343747	437.025	20.2352	0.573136	0.00481313	0.338624	435.7	71.995	0.617641	0.00186596	0.226164	1706.57	80.0274
130029443	3	20130304	1	49	174.8	69	22.5822	87.8	0.502288	20130304	14.68	0.957	-0.2	0.2	4.03	0.756	-0.7	0	1221.58	58.7068	0.654276	4.56565	0.579019	3.5289	0.658636	0.0226872	0.521505	90.9229	4.49599	0.557208	0.0210713	0.492089	89.7426	13.5914	0.670257	0.00632002	0.36981	344.823	17.6671	0.563116	0.00576135	0.477075	729.567	52.3228	0.761464	0.0313836	0.380491	2873.61	47.4784
448995	3	20190118	2	74	170	70.7	24.4637	85.4	0.502353	20190213	3.78	0.551	-3.4	-1.1	1.57	0.356	-4.8	-2.1	1113.28	37.4235	2.32999	15.1012	0.437035	0.612245	0.86108	0.104876	0.758553	27.1722	0.699615	0.834063	0.100097	0.745764	26.7373	1.96471	0.886035	0.0312561	0.610869	98.7313	2.34917	0.858322	0.0288146	0.592617	97.0039	7.32313	0.892919	0.00858872	0.453171	375.31	8.98802
130038463		20190412	2	53	160.2	59.6	23.2232	80.5	0.502497	20190412	15.84	0.999	0.1	0.1	4.86	0.937	0.7	0.9	1260.94	47.0398	-0.0967398	3.67929	0.1582	1.55627	0.781135	0.0402016	0.637013	122.877	1.60786	0.764484	0.0408051	0.630071	122.762	5.84544	0.791573	0.0110642	0.474227	468.476	6.01429	0.776786	0.0112347	0.403601	207.534	24.8341	0.770696	0.00333329	0.314053	816.083	39.6344
150143464	3	20191115	1	50	173.3	71.6	23.8405	87.1	0.502597	20191115	11.34	0.789	-1.6	-0.9	3.36	0.645	-1.6	-0.9	1200.02	60.3295	0.641804	5.32736	0.801841	4.41417	0.599918	0.0198639	0.504436	75.2817	4.93944	0.552613	0.0191219	0.483464	74.9563	17.07	0.605842	0.00570694	0.352648	284.07	19.0513	0.559964	0.00561851	0.338098	283.019	67.525	0.608617	0.00210278	0.23592	1102.23	75.8082
150090410	3	20170327	2	45	169.9	61.8	21.4093	85.4	0.502649	20170327	12.57	0.934	-0.3	-0.1	4.01	0.925	1.1	1.5	1301.67	62.8377	0.394378	3.27313	0.368634	2.0547	0.793616	0.0330802	0.612335	158.299	3.32946	0.659506	0.0271401	0.552027	157.555	7.90541	0.806943	0.0114373	0.454322	610.713	13.3424	0.668532	0.00961147	0.405865	607.534	31.2606	0.810687	0.00538073	0.321551	2395.29	53.0336
170011068		20200805	2	56	167.7	68.1	24.2148	84.3	0.502683	20200805	11.73	0.844	-1.1	0.3	3.6	0.721	-0.8	0.6	1159.42	61.1796	0.185698	3.28153	1.00701	2.77607	0.763177	0.0214413	0.541964	52.3055	3.68754	0.692957	0.0188974	0.499897	51.998	10.734	0.768152	0.00608753	0.387282	194.674	14.3192	0.698216	0.00540489	0.354592	193.512	42.5668	0.77032	0.00202858	0.262485	751.487	57.3064
388540		20180125	2	66	166.9	61.8	22.1858	83.9	0.502696	20180125	13.2	0.839	-1.2	-0.3	3.55	0.679	-1.3	-0.2	1188.15	145.559	2.35392	10.0787	1.37869	1.11177	0.963034	0.0331632	0.701565	68.0944	1.80139	0.939695	0.0298783	0.670167	67.0778	4.0426	0.96707	0.0133592	0.559362	260.177	6.84352	0.943842	0.0114751	0.366004	286.82	38.0538	0.838696	0.00204108	0.278873	1120.34	62.6186
398654	3	20170202	1	43	175.8	73.1	23.6526	88.4	0.502844	20170202	11.32	0.738	-2.1	-1.2	3.83	0.732	-0.9	-0.1	1145.94	58.4753	0.565864	4.25915	0.968201	3.2349	0.707037	0.0226921	0.534356	44.3875	3.16797	0.711046	0.0229285	0.529801	44.0209	12.5161	0.715513	0.00617459	0.385702	164.697	12.2779	0.718923	0.00634871	0.366686	346.015	64.6425	0.620534	0.00189984	0.246056	1345.41	62.2529
130067010	3	20160811	1	55	178.3	85.1	26.7687	89.7	0.503085	20160811	20.86	1.107	1	1.2	5.36	0.922	0.6	1.5	1207.76	74.6349	0.116445	3.29547	0.856551	5.85486	0.656007	0.0130883	0.457001	83.675	10.2014	0.391786	0.0111105	0.39437	81.0878	23.3694	0.657127	0.00374807	0.314979	316.648	40.515	0.396197	0.00328813	0.266637	306.346	93.7569	0.658702	0.00148727	0.205686	1231.32	162.311
140155776	3	20180906	2	86	172.7	72.8	24.4088	86.9	0.503185	20180906	8.66	0.666	-2.6	0	1.8	0.431	-3.5	-0.5	1100.56	56.9692	0.763513	3.86279	0.619961	1.42292	0.860176	0.0342719	0.638898	25.1047	1.76347	0.822868	0.031139	0.611233	24.5542	5.22292	0.87138	0.00962728	0.481232	91.4286	6.66667	0.832208	0.00847143	0.452916	89.2501	20.4505	0.873991	0.00291287	0.34134	348.128	26.4385
507694		20181011	2	58	158.7	57.2	22.7113	79.9	0.503466	20181011	13.5	0.866	-1	-0.4	4.52	0.79	-0.5	0.3	1190.41	61.1087	0.775827	5.95542	0.909936	3.74411	0.66449	0.0209095	0.522891	69.6216	4.83333	0.568009	0.0184629	0.481662	68.6956	14.1547	0.675343	0.00587774	0.372092	261.45	18.6748	0.573671	0.00526192	0.356008	147.02	67.1494	0.628951	0.0018669	0.22585	572.943	64.3674
150084866	3	20150715	1	50	182.5	85.1	25.5508	91.9	0.503562	20150715	15.55	1.055	0.6	0.8	4.08	0.858	0.1	0.9	1234.56	67.1069	0.0990129	3.2288	0.559808	4.31669	0.697298	0.0156731	0.491993	102.618	3.93144	0.718377	0.0165897	0.497521	102.507	16.7056	0.704349	0.00452361	0.349299	390.326	15.198	0.72482	0.00472883	0.349706	389.886	66.5264	0.705322	0.00157691	0.232781	1523.3	60.4025
150069852	3	43552	2	52	160.9	58.6	22.6353	81.06	0.503791	43552	14.99	1.005	0.2	0.5	5.06	0.869	0.2	1.1	1200.16	71.1155	1.09045	9.08325	0.869717	4.42439	0.68431	0.017651	0.497264	76.403	5.07937	0.636706	0.0171917	0.487814	76.5012	16.9866	0.693126	0.00502528	0.353758	288.499	19.8486	0.641025	0.00487431	0.589159	563.274	17.9237	0.957143	0.0575657	0.520294	2250.82	22.9353
170131647	3	20191128	1	49	175.4	67.1	21.8104	88.4	0.503991	20191128	10.26	0.744	-2	-1.2	3.43	0.649	-1.6	-0.8	1162.19	44.4869	0.219455	3.24977	0.994844	2.45745	0.618378	0.0331242	0.566884	51.0733	2.53036	0.602569	0.0333794	0.567587	50.5125	9.36643	0.629511	0.00892463	0.408447	190.285	9.50952	0.619152	0.00900865	0.35368	340.033	38.9185	0.750023	0.00214569	0.27352	1342.4	61.8181
535376	3	20161018	1	76	177.5	80.2	25.4553	89.5	0.504225	20161018	14.33	0.871	-1	0	3.16	0.599	-2	-0.6	1090.27	57.0696	0.103813	2.68683	0.540482	1.99787	0.789985	0.0327077	0.617326	21.4026	2.06394	0.78183	0.0307432	0.599528	21.4932	7.67574	0.799651	0.00930158	0.453102	76.7515	7.82353	0.794325	0.00899719	0.442252	77.0916	30.5911	0.802268	0.00329307	0.314404	291.052	31.2161
464817	3	20160331	2	40	174.3	64.4	21.1978	87.9	0.504303	20160331	10.67	0.922	-0.4	-0.2	2.57	0.603	-1.9	-1.4	1230.93	56.3764	0.366081	4.81844	0.454232	2.97249	0.686015	0.0269039	0.546072	98.2334	3.12381	0.661943	0.0255093	0.530768	97.9143	11.5626	0.694086	0.00759733	0.386806	372.865	12.0419	0.672888	0.00712018	0.382041	371.672	45.9649	0.696079	0.00270948	0.261951	1453.34	47.261
254872	3	43997	2	52	160.1	59.4	23.1741	80.76	0.504435	43997	11.82	0.7443	-2	-1.1	3.74	0.749	-0.8	0.1	1138.52	59.89	0.457007	3.48699	0.930908	3.7324	0.676364	0.0208958	0.51482	40.8095	4.77582	0.583992	0.0186773	0.479833	40.0929	14.5305	0.681995	0.00572144	0.370822	150.565	18.4997	0.592988	0.00530333	0.608447	572.221	22.1765	0.94943	0.0575993	0.506416	2290.42	26.1173
120142204	3	20161129	1	56	181.3	82.3	25.0383	91.5	0.504688	20161129	18.54	1.145	1.3	1.4	6	1.048	1.6	2.5	1273.07	80.9667	-0.0242969	3.19467	0.632205	4.90852	0.733648	0.0159227	0.499793	134.255	6.65833	0.62608	0.0138349	0.456865	134.38	19.3257	0.740181	0.00516509	0.351859	516.552	26.4799	0.631712	0.00472222	0.321667	516.918	77.8739	0.740829	0.00248241	0.239237	2025.63	106.222
140151534	2	43556	2	40	162.1	55.8	21.2358	81.83	0.504812	43532	11.89	0.905	-0.5	-0.4	3.06	0.681	-1.1	-0.7	1315.17	213.733	1.90603	7.02996	1.60593	1.10084	0.96413	0.0754583	0.751196	131.913	2.34785	0.921776	0.0632422	0.692613	130.376	4.14678	0.96758	0.0551308	0.625982	513.339	9.36538	0.925047	0.0459137	0.565335	506.967	16.4493	0.968542	0.0497551	0.513683	2023.79	37.642
170165419		20171205	1	74	173.1	77.5	25.8647	87.4	0.50491	20171205	14.32	0.937	-0.4	0.4	3.57	0.666	-1.5	-0.1	1217.36	63.1364	0.463071	4.25858	0.647108	3.00682	0.752552	0.0224186	0.545731	89.3045	3.24501	0.732104	0.022067	0.545433	88.9305	11.5449	0.761809	0.0061015	0.39389	338.956	12.3538	0.744457	0.00609183	0.395315	337.56	45.7153	0.763045	0.00195054	0.269145	1318.92	48.3339
488700	3	44048	1	55	176.3	81.7	26.2856	89.08	0.505275	44048	13.94	0.926	-0.5	0	3.98	0.743	-0.8	0	1249.18	129.997	0.607425	2.93673	1.34629	1.68152	0.954497	0.0387721	0.679531	117.232	2.0849	0.943811	0.0345844	0.666799	115.598	6.46851	0.957307	0.0231647	0.53935	453.197	8.13021	0.946537	0.019636	0.52619	446.522	25.4972	0.958476	0.0170664	0.41679	1781.81	32.7365
160080494	3	20160629	1	56	177.1	71.3	22.7328	89.5	0.505364	20160629	9.56	0.638	-2.9	-1.8	3.09	0.515	-2.7	-1.8	1133.95	45.7114	0.270781	4.53633	0.863121	2.14952	0.672916	0.0361896	0.579782	36.8467	2.57437	0.605378	0.0345378	0.564955	36.483	8.19429	0.682509	0.00974331	0.422306	135.282	9.66332	0.62277	0.00937062	0.330544	380.761	88.9986	0.58447	0.00161586	0.207444	1484.54	77.6876
438527	3	20200720	1	47	178.8	82.4	25.7746	90.5	0.506152	20200720	15.17	0.935	-0.4	0	4.78	0.87	0.2	0.9	1236.52	50.3638	0.119363	3.71446	0.332691	2.71164	0.656844	0.0295528	0.5639	101.843	3.93555	0.499688	0.0265988	0.512663	100.858	10.5079	0.669074	0.00821121	0.411757	387.526	15.4332	0.511719	0.0073125	0.363745	383.609	41.8591	0.671076	0.00253615	0.274228	1509.23	61.4877
130044237	3	20130329	1	49	170.1	60.4	20.8751	86.2	0.506761	20130329	10.83	0.734	-2.1	-1.3	3.52	0.756	-0.7	0	1173.82	62.2405	0.152974	4.25804	0.973782	4.45554	0.620781	0.0200473	0.504068	59.4562	5.8416	0.507014	0.0182735	0.472001	58.3664	17.5479	0.62947	0.00564506	0.352564	222.553	23.4242	0.5097	0.00518236	0.328752	218.143	69.7045	0.632432	0.00192941	0.23583	861.406	93.7404
150065212	3	20150519	2	49	161.2	60.6	23.3208	81.7	0.506824	20150519	13.71	0.954	-0.3	0.2	4.65	0.905	0.5	1.3	1257.82	67.4743	0.504402	5.39029	0.437247	4.00077	0.686608	0.0179922	0.502285	120.451	4.48571	0.636119	0.0179884	0.498229	119.836	15.5926	0.693239	0.00517499	0.355672	459.655	17.6093	0.641286	0.00522771	0.416156	585.827	36.3638	0.776201	0.0039815	0.312419	2309.3	44.7952
130100058	3	20150513	1	64	176.7	75.5	24.181	89.6	0.507074	20150513	12.79	0.957	-0.2	0.3	3.95	0.745	-0.8	0.2	1235.88	64.825	0.375405	3.67345	0.503784	2.87919	0.779531	0.0206597	0.549432	103.73	3.71592	0.712279	0.018092	0.512877	103.273	11.0311	0.786391	0.00571043	0.398925	394.974	14.406	0.717675	0.00503026	0.363396	393.074	43.6352	0.788523	0.00188512	0.272168	1541.33	57.3027
476674		20190725	2	57	165.8	69.6	25.3186	84.1	0.507238	20190725	11.2	0.934	-0.3	0.9	3.18	0.711	-0.9	0.6	1256.9	72.6913	0.267931	2.91372	0.500216	1.49673	0.903906	0.0274086	0.639312	123.07	1.79591	0.883806	0.0252504	0.615892	122.171	5.61802	0.910746	0.00817848	0.48444	471.711	6.84414	0.890547	0.0073362	0.46182	468.311	22.0635	0.912785	0.00285318	0.347125	1846.12	27.0251
480794	1	20150910	2	42	158.7	60.6	24.0613	80.5	0.507246	20150910	14.44	0.967	0	0.1	3.32	0.751	-0.5	0	1253.99	56.3951	0.096855	4.10587	0.345659	2.11	0.774527	0.0297563	0.591702	117.72	2.792	0.703746	0.026124	0.544594	117.132	8.08761	0.784576	0.00810018	0.434377	448.408	10.7915	0.715063	0.007176	0.394271	446.127	31.7232	0.788156	0.00244371	0.30141	1752.52	42.5935
140103223	3	20180518	2	40	172.2	74.4	25.0903	87.4	0.507549	20180518	10.36	0.789	-1.6	-1.3	3.47	0.778	-0.2	0.2	1231.04	44.6747	0.296089	3.42931	0.234598	1.54195	0.757134	0.0397442	0.61661	97.8175	2.90857	0.547347	0.0307749	0.544287	97.0703	5.70351	0.772475	0.0109612	0.460438	370.229	11.1543	0.560962	0.00847412	0.394811	367.229	22.4223	0.775304	0.00320918	0.321472	1441.3	43.8857
479621	3	20170331	2	57	164.9	64.9	23.8673	83.7	0.50758	20170331	13.13	1	0.3	1.4	3.89	0.858	0.5	2	1288.29	84.1426	0.707911	6.11563	0.580727	4.21173	0.736105	0.0183729	0.522113	145.948	4.27742	0.733954	0.0187713	0.528115	146.513	16.9005	0.738965	0.00624333	0.373416	561.89	17.0419	0.739241	0.00637586	0.379627	564.234	68.0274	0.740565	0.00300005	0.254967	2203.97	68.6297
549349	3	20191107	1	48	176.4	79.2	25.4524	89.6	0.507937	20191107	14.92	1.053	0.7	0.8	4.13	0.805	0	0.5	1237.86	57.3269	0.441502	3.22702	0.387316	3.35382	0.674443	0.0214333	0.521638	103.606	3.31987	0.680247	0.0211642	0.522805	103.613	12.8738	0.684175	0.0061092	0.376149	395.488	12.6919	0.690925	0.00609207	0.374735	395.476	50.8264	0.688304	0.00217989	0.254314	1542.17	50.3973
364320	3	20161010	2	48	162.4	63.4	24.039	82.5	0.508005	20161010	9.2	0.835	-1.2	-0.6	2.67	0.611	-1.8	-1.2	1244.95	65.4061	1.17058	6.82068	0.406304	2.62245	0.761581	0.025102	0.569428	108.527	3.62061	0.670752	0.0213458	0.519386	108.378	10.3073	0.766673	0.00693483	0.421665	413.626	14.1097	0.681362	0.00601139	0.36859	413.207	41.1369	0.768346	0.00222874	0.29657	1614.83	55.9073
483388		20190318	2	48	161.8	63.4	24.2177	82.2	0.508035	20190318	14.43	0.938	-0.3	0.1	3.63	0.765	-0.4	0.1	1287.02	72.2681	0.378706	3.19409	0.469233	3.69832	0.723092	0.0219747	0.540542	145.016	3.32468	0.747316	0.0222601	0.546546	144.623	14.6214	0.731603	0.00830112	0.397534	559.223	13.1448	0.755153	0.00840698	0.398926	557.551	58.4315	0.73497	0.00435087	0.280042	2194.08	52.5078
395339	3	20171106	1	46	173.2	67	22.3346	88	0.508083	20171106	9.99	0.763	-1.5	0.4	2.72	0.624	-1.8	0.8	1129.42	52.2664	1.06306	4.8497	0.819965	1.86965	0.783461	0.0385377	0.618756	35.6664	1.58047	0.81959	0.0391965	0.632043	36.0633	6.94786	0.795328	0.0108802	0.468507	131.33	5.9037	0.828749	0.0109436	0.3791	321.798	53.1451	0.758017	0.00185684	0.255995	1254.89	49.0206
502947	3	42720	1	45	175.6	81.8	26.528	89.3	0.508542	42720	16.98	1.01	0.2	0.5	4.55	0.821	-0.2	0.4	1226.27	158.711	2.02232	7.70372	1.45848	1.61278	0.948812	0.0281957	0.655454	89.5306	2.85359	0.909078	0.0242532	0.614576	88.459	6.14611	0.952332	0.0143673	0.5154	343.979	11.2566	0.912311	0.011873	0.474263	339.636	24.2456	0.953639	0.0107235	0.384088	1348.69	45.1549
120029550		20120808	2	39	157.7	64.4	25.8954	80.2	0.508561	20120808	13.95	0.977	0.1	0.2	3.04	0.768	-0.3	0.1	1302.79	63.5219	-0.152154	4.38663	0.435464	1.68576	0.841614	0.0342514	0.636945	160.693	2.68311	0.732663	0.0279513	0.570929	160.573	6.31083	0.85334	0.0108292	0.486108	619.51	10.428	0.742626	0.008344	0.42273	618.776	24.9671	0.856042	0.00428387	0.356623	2429.33	41.9977
140044434		20200804	2	55	166.6	63.4	22.8423	84.8	0.509004	20200804	14.48	0.921	-0.5	-0.2	4.73	0.868	0.2	0.6	1195.05	74.4772	-0.0809746	3.11062	0.890494	6.82645	0.607846	0.0125228	0.437183	74.719	11.545	0.330419	0.0108807	0.393018	72.3474	27.0303	0.613019	0.00380042	0.301013	282.1	46.1048	0.334054	0.00353962	0.358016	268.071	53.2176	0.636007	0.00220656	0.252231	1039.35	61.604
140172788	3	20161010	1	37	174.8	81.4	26.6404	89	0.509153	20161010	13.4	0.889	-0.8	-0.5	3.53	0.661	-1.5	-1.1	1257.32	45.3003	0.161829	3.1887	0.090779	2.11706	0.683888	0.0334292	0.579861	119.372	3.07243	0.534188	0.029337	0.533522	117.795	8.00595	0.694109	0.00902305	0.428461	455.585	11.7821	0.54286	0.0082211	0.37946	449.427	31.5582	0.698054	0.00275661	0.296808	1778.93	46.9249
180005378		20190604	2	53	160.6	67	25.9767	81.8	0.50934	20190604	9.65	0.697	-2.4	-1.1	3.06	0.663	-1.3	-0.3	1212.08	69.0525	0.455816	3.66151	0.796824	2.92911	0.797047	0.0184838	0.548425	86.7121	2.86811	0.801594	0.0185321	0.544816	86.1141	11.2642	0.803748	0.00516002	0.389817	327.886	10.9773	0.809281	0.00522133	0.39241	325.655	44.3292	0.806803	0.00172597	0.25921	1276.23	43.5551
160168743	3	20190609	1	56	176.5	60.8	19.517	89.9	0.509348	20190527	7.83	0.614	-1.8	-1.4	2.97	0.562	-2.9	-1.7	1090.28	58.6965	0.441874	3.74263	0.536843	3.40915	0.651458	0.0248669	0.540552	21.039	4.04274	0.587632	0.0232139	0.512549	20.4353	13.4323	0.657817	0.00723528	0.385277	75.0848	15.7607	0.600281	0.00671774	0.36986	72.87	53.8201	0.65952	0.00281826	0.263098	283.432	63.3297
20352		20190613	2	73	164.9	59.2	21.7711	84	0.5094	20190613	11.53	0.747	-2	-1.1	3.59	0.72	-1	-0.2	1146.37	59.2758	0.617972	4.33503	0.97983	4.03671	0.635882	0.0216147	0.505041	44.2599	3.82924	0.656641	0.0225676	0.521666	43.8959	15.7051	0.641682	0.00603398	0.358865	163.889	14.8848	0.662029	0.00625218	0.373192	167.424	33.0471	0.817269	0.00222694	0.289219	656.521	55.3289
130184692	3	20161202	1	54	169.6	68.2	23.7101	86.4	0.509434	20161202	11.22	0.751	-1.9	-1.1	3.65	0.713	-1.1	-0.2	1153.16	38.3802	0.235942	4.56503	0.994874	1.42402	0.697932	0.0530057	0.649531	45.7686	1.14912	0.75623	0.0555579	0.661988	45.6967	5.21764	0.71664	0.0146022	0.490797	169.737	4.05326	0.779508	0.0151185	0.500751	169.471	20.4972	0.720496	0.0042033	0.347818	652.178	15.869
150073068		20190402	2	51	162.9	63	23.741	83	0.509515	20190402	8.96	0.769	-1.7	-0.8	2.8	0.596	-1.9	-1.2	1229.58	43.7631	0.749465	4.58828	0.195947	1.32222	0.78429	0.0488792	0.652332	96.3465	1.55808	0.734202	0.047665	0.635581	95.1551	4.73182	0.804228	0.0135134	0.4977	366.002	5.76667	0.749572	0.0130471	0.470178	361.151	18.4773	0.807894	0.00385471	0.348479	1425.98	22.5283
111582	3	20161019	1	49	172.6	69.1	23.1951	88	0.509849	20161019	12.39	0.823	-0.7	-0.4	3.15	0.653	-1.9	-0.9	1191.53	176.354	2.44106	9.88899	1.40627	1.10712	0.968609	0.0345919	0.715364	68.2082	1.53457	0.956771	0.0330796	0.701165	67.9019	4.04687	0.971985	0.0151131	0.575065	261.077	5.94136	0.959145	0.0138782	0.381821	351.948	47.0898	0.702443	0.00218884	0.264194	1394.12	48.1846
453313	3	20180330	1	49	170.6	59.5	20.4437	87	0.509965	20180330	16.2	0.983	0	0.4	4.61	0.82	-0.2	0.5	1184.22	61.091	0.383737	5.57091	0.924675	3.13216	0.717544	0.0218653	0.525275	66.0329	4.94716	0.555084	0.0186473	0.478173	64.3989	12.0204	0.727218	0.00595881	0.374981	248.104	19.4023	0.560932	0.0051414	0.33909	241.544	47.6279	0.729501	0.00193844	0.251608	960.14	76.8756
140149863	3	20191129	1	58	167.3	62.5	22.33	85.4	0.51046	20191129	11.84	0.757	-1.9	-1.2	3.81	0.74	-0.9	-0.2	1191.18	70.4324	0.0276926	3.11724	0.900887	4.66721	0.702956	0.0147058	0.48492	72.4699	4.8413	0.686831	0.0144494	0.471786	71.988	18.4358	0.706684	0.00407488	0.341631	273.136	19.1429	0.690486	0.00403887	0.381222	149.045	50.7307	0.702856	0.00187601	0.252661	576.825	48.9709
140103223		20180518	2	40	154.7	62.2	25.9902	79	0.510666	20180518	10.36	0.789	-1.6	-1.3	3.47	0.778	-0.2	0.2	1231.04	44.6747	0.296089	3.42931	0.234598	1.54195	0.757134	0.0397442	0.61661	97.8175	2.90857	0.547347	0.0307749	0.544287	97.0703	5.70351	0.772475	0.0109612	0.460438	370.229	11.1543	0.560962	0.00847412	0.394811	367.229	22.4223	0.775304	0.00320918	0.321472	1441.3	43.8857
150062176	3	20190510	1	59	174.8	64.1	20.9785	89.3	0.51087	20190510	16.27	0.877	-0.9	-0.2	4.15	0.764	-0.7	0.3	1169.84	52.1447	0.195053	3.43654	0.97708	2.46617	0.720697	0.027717	0.565144	56.4825	4.09881	0.531212	0.0227697	0.50178	55.4442	9.21284	0.733706	0.0076859	0.412652	211.021	15.6843	0.541967	0.00633895	0.359711	206.974	36.6109	0.735817	0.00227843	0.276274	815.868	62.7297
150033286	3	20200625	1	53	178.2	85.9	27.0507	91.1	0.511223	20200625	15.56	0.992	0.1	0.4	4.22	0.767	-0.6	0.2	1256.69	57.3207	0.492295	4.7415	0.249395	2.71272	0.722119	0.0255567	0.555383	119.535	3.4208	0.64988	0.0230991	0.530629	119.263	10.342	0.731813	0.00711223	0.402046	456.225	13.0916	0.661034	0.00648199	0.377201	455.226	40.9384	0.734823	0.00231024	0.270661	1781.84	52.1026
467966	3	20171011	1	72	174.8	69.6	22.7786	89.4	0.511442	20171011	18.65	1.098	0.9	1.1	3.88	0.74	-0.9	-0.1	1206.88	55.0562	-0.0250066	4.00959	0.650505	2.84659	0.701461	0.0254881	0.538136	80.3443	3.3396	0.650429	0.0241332	0.509198	80.0387	11.0506	0.709331	0.00699122	0.385485	303.825	12.9932	0.658829	0.00659962	0.322339	135.977	75.6447	0.668146	0.00167405	0.23723	522.338	98.8419
248264	3	20150820	1	61	178.7	93	29.1228	91.4	0.511472	20150820	14.51	0.879	11.39	0.904	-0.6	0.9	3.94	0.83	0.3	2	1230.57	69.4153	0.591603	5.46238	0.659164	2.48355	0.814284	0.0227961	0.576212	99.6546	3.69611	0.717936	0.0195938	0.523448	98.3527	9.48224	0.367191	268.587	19.1432	0.590962	0.00510843	0.33818	267.726	61.2765	0.670186	0.00183172	0.247997	1041.76	76.0719
150137247		20161123	1	58	178.1	97.6	30.7696	91.1	0.51151	20161123	15.09	1.018	10.52	0.799	-1.5	0.3	3.55	0.737	-0.6	1.2	1176.16	55.1474	0.501017	3.94787	0.968754	2.93274	0.694705	0.0252774	0.550698	60.4597	3.73661	0.606981	0.0228684	0.501585	60.0052	11.3045	0.324278	376.95	25.4054	0.621789	0.00369744	0.306176	375.244	89.1524	0.673934	0.00150877	0.214182	1468.57	101.134
120142204		20161129	1	56	177.6	84.1	26.6631	90.9	0.511824	20161129	18.54	1.145	1.3	1.4	6	1.048	1.6	2.5	1273.07	80.9667	-0.0242969	3.19467	0.632205	4.90852	0.733648	0.0159227	0.499793	134.255	6.65833	0.62608	0.0138349	0.456865	134.38	19.3257	0.740181	0.00516509	0.351859	516.552	26.4799	0.631712	0.00472222	0.321667	516.918	77.8739	0.740829	0.00248241	0.239237	2025.63	106.222
499677	3	43164	1	49	164	69	25.6544	83.95	0.51189	43164	15.67	0.995	0.7	0.7	4.23	0.761	-0.7	0.1	1227.93	165.54	1.51581	5.41381	1.53325	1.38118	0.966461	0.0385263	0.70058	95.1212	2.06594	0.950148	0.0370277	0.691385	95.5004	5.21385	0.969082	0.0222634	0.564781	366.813	8.16014	0.951903	0.0211547	0.554362	368.267	20.6109	0.969821	0.0164984	0.437691	1440.99	32.6837
150137247	3	20151110	1	57	175.4	62.9	20.4452	89.8	0.511973	20151110	16.03	1.073	0.7	1	4.05	0.745	-0.8	0.1	1263.47	80.5965	0.590053	4.25192	0.637319	4.54651	0.726335	0.0167361	0.505318	124.841	6.25758	0.613309	0.0146469	0.463646	123.128	17.925	0.733274	0.00566658	0.359469	478.927	24.7133	0.621766	0.00465182	0.324371	472.054	71.6651	0.73504	0.00282991	0.248855	1875.5	99.1189
130070447		20150514	1	40	173.8	76.8	25.425	89	0.512083	20150514	15.44	0.956	-0.2	0.1	4.58	0.812	-0.3	0.2	1239.65	68.4949	0.128738	3.24895	0.575456	4.85	0.667526	0.0156619	0.487759	106.504	7.726	0.470637	0.0132082	0.423401	104.999	18.9463	0.670079	0.00465878	0.339366	405.503	30.0363	0.477574	0.0041717	0.296423	399.788	76.0019	0.669621	0.00186557	0.224679	1580.86	120.262
459886	3	20151106	1	57	176.1	80.3	25.8939	90.2	0.512209	20151106	13.46	0.818	-1.4	-0.6	3.42	0.693	-1.2	-0.3	1164.56	50.3242	0.584315	5.80299	1.01033	2.71761	0.657887	0.0299806	0.561226	53.0909	2.88718	0.628992	0.0293248	0.546399	52.9368	10.4324	0.66534	0.00828125	0.405597	197.162	10.9932	0.640296	0.00821454	0.394241	196.735	41.4438	0.667077	0.0025594	0.280082	760.46	43.3641
495491	3	20190613	1	50	170.8	76.4	26.1889	87.5	0.512295	20190613	9.79	0.731	-2.1	-1.3	3.82	0.708	-1.1	-0.4	1163.75	72.785	0.356996	3.73447	1.03149	8.53378	0.468414	0.0124892	0.420274	53.5887	7.49406	0.536662	0.0126326	0.424649	53.8752	34.3176	0.467524	0.0037536	0.285335	200.352	29.5348	0.545325	0.00385679	0.293726	201.795	136.711	0.468829	0.00158361	0.186006	773.557	117.834
120073328	3	20200622	1	59	173.9	71.3	23.5771	89.1	0.512363	20200622	8.51	0.701	-2.1	0	2.35	0.511	-3.1	-0.3	1141.87	65.5641	0.437409	4.60876	0.995967	3.2152	0.748137	0.0208308	0.533987	43.3526	5.04907	0.59981	0.0174674	0.488921	42.4111	12.4973	0.754501	0.00605134	0.388338	160.241	19.8009	0.60515	0.00528635	0.350367	334.132	41.8003	0.74216	0.00213312	0.272071	1314.9	67.0693
170171982	1	20200109	2	59	163.5	61.3	22.9311	83.8	0.512538	20200109	16.13	0.945	-0.3	0.2	5.08	0.931	0.7	1.6	1187.82	61.126	-0.131565	3.46016	0.868534	3.86439	0.671559	0.019282	0.510256	68.3145	3.83924	0.669965	0.0192917	0.508398	68.3661	15.0775	0.677488	0.00531067	0.362758	256.806	14.8598	0.67873	0.00541842	0.337004	155.729	58.0527	0.675378	0.00199832	0.248037	607.597	76.1507
385377	3	20151204	2	54	158	60.9	24.3951	81	0.512658	20151204	9.45	0.742	-2	-0.7	3.08	0.65	-1.4	-0.4	1178.42	56.9215	0.169864	3.15449	0.945019	2.07213	0.804103	0.0255687	0.5831	62.9377	2.58385	0.753235	0.0236453	0.556918	62.8531	7.76077	0.81305	0.00708717	0.428749	235.561	9.84115	0.760495	0.00653863	0.406042	235.15	30.2138	0.817181	0.00218322	0.296197	911.81	38.7479
480554	3	20180807	1	55	173.8	60.8	20.1282	89.1	0.512658	20180807	14.28	0.86	-1	-0.4	4.04	0.722	-1	-0.1	1204.39	69.7345	0.302761	3.27374	0.847145	5.07702	0.667368	0.0150649	0.478238	80.3402	4.73938	0.684133	0.0154258	0.487319	80.7696	20.0193	0.672018	0.00427377	0.335756	303.641	18.3037	0.694649	0.00445647	0.344378	305.418	79.4583	0.674203	0.00159267	0.221443	1181.17	72.2458
503884	3	20180803	2	45	164.2	60.3	22.3651	84.2	0.512789	20180803	13.21	0.872	-0.8	0	3.43	0.695	-1	-0.2	1262.38	235.925	2.11029	8.28834	1.70963	1.29556	0.972269	0.0473512	0.723591	104.441	3.09629	0.932429	0.0378212	0.671335	102.207	4.919	0.974443	0.0330166	0.588664	405.545	12.3739	0.934412	0.025468	0.390409	458.589	30.4912	0.792167	0.00250422	0.299425	1819.3	50.1245
420816	3	43354	2	80	156	45	18.4911	80.02	0.512949	43339	7.09	0.57	-3.2	-0.8	2.02	0.438	-3.9	-0.8	1041.02	132.745	3.23383	16.7439	0.61365	1.0121	0.955087	0.301458	0.833595	17.5282	1.05079	0.952609	0.303263	0.821981	17.9566	3.97581	0.958119	0.226674	0.737781	64.8548	4.10265	0.955912	0.225874	0.722417	66.4455	15.8276	0.959324	0.19903	0.6512	250.166	16.4349
535349	2	43693	1	82	156.3	57.3	23.4551	80.18	0.512988	43684	15.64	1	0.1	0.5	4.01	0.688	-1.3	-0.4	1198.04	40.1187	0.571973	4.19929	0.574563	1.01843	0.802675	0.0571004	0.694513	73.3108	0.796296	0.84742	0.0622657	0.717665	73.179	3.59029	0.821848	0.016006	0.536173	276.135	2.7037	0.867319	0.0178311	0.494708	215.443	24.3913	0.945285	0.00377034	0.382531	803.394	25.9346
120063707		20190925	2	48	161.9	65.6	25.0271	83.1	0.51328	20190925	11.68	0.829	-1.2	-0.7	2.78	0.539	-2.5	-1.9	1181.53	66.7945	0.712844	5.51823	1.00322	3.74242	0.708981	0.0200114	0.523606	64.5481	5.51786	0.567267	0.0174346	0.469928	63.6143	14.7683	0.711994	0.00579879	0.365695	243.025	21.6875	0.573749	0.00498724	0.325398	239.261	59.1301	0.713575	0.00218765	0.244618	942.74	86.8911
180085819	3	43656	1	61	169	68.2	23.8787	86.75	0.513314	43656	20.34	1.18	1.6	1.6	4.45	0.809	-0.3	0.7	1203.41	145.023	1.66713	6.26504	1.41477	1.23427	0.965059	0.0370776	0.720656	80.6801	1.46183	0.958356	0.0352948	0.716074	80.0995	4.6092	0.968267	0.0185775	0.573452	310.886	5.67688	0.960631	0.016754	0.570676	308.404	18.0301	0.96935	0.0127289	0.434807	1218.79	22.65
140073586	3	20180612	2	43	167.7	69.6	24.7482	86.1	0.513417	20180612	13.96	0.953	-0.3	0.1	4.78	0.927	0.7	1.2	1251.14	52.9969	0.264937	3.28301	0.240557	3.41503	0.614379	0.0238597	0.533491	114.761	3.56839	0.602223	0.0235498	0.525583	114.071	12.9461	0.62849	0.00700185	0.386383	437.249	13.7551	0.609957	0.00688672	0.378568	434.569	51.8301	0.629223	0.00238824	0.259689	1708.2	55.2015
150067126	3	20190715	1	44	169.8	73.6	25.5272	87.2	0.513545	20190715	15.39	0.89	-0.8	-0.3	4.59	0.9	0.4	1	1224.48	45.1765	0.151537	3.46373	0.354576	2.6541	0.596224	0.0316384	0.555489	91.9001	3.25449	0.501458	0.0298376	0.530531	90.8983	10.1792	0.604306	0.00857951	0.403209	348.585	12.4086	0.514386	0.00815046	0.389926	344.85	40.381	0.606219	0.002677	0.275181	1356.64	48.9801
150139708	3	20191127	1	57	171.2	77.3	26.3738	88	0.514019	20191127	14.21	1.007	0.2	0.5	4.01	0.769	-0.6	0.3	1218.19	61.9273	0.693789	5.59549	0.663058	3.36649	0.690436	0.0222657	0.526071	88.4069	3.86165	0.642031	0.0210228	0.50297	88.2869	13.2053	0.698432	0.00614362	0.377627	335.026	15.4722	0.643986	0.00568545	0.352798	334.487	51.9867	0.701944	0.00200317	0.257768	1302.07	61.1976
475992		20181224	2	56	166.3	71.6	25.8898	85.5	0.514131	20190124	9.14	0.698	-2.1	-0.8	1.55	0.569	-2.5	-0.8	1184.84	55.7754	0.558513	4.2557	0.930315	2.26982	0.766255	0.0277685	0.583178	66.5955	2.00102	0.794285	0.0289275	0.593356	66.6281	8.37398	0.781142	0.00797671	0.430539	249.308	7.40612	0.806686	0.00824813	0.438328	249.432	32.9543	0.78415	0.00241568	0.293625	966.118	28.8832
150143464		20191115	1	50	181.7	96.7	29.2898	93.5	0.514584	20191115	11.34	0.789	9.46	0.779	-1.6	-0.2	2.61	0.567	-2.2	-0.9	1205.06	43.2278	0.846242	5.84366	0.510007	1.03049	0.82484	0.0531745	0.66299	78.6818	1.13566	0.794914	0.0546566	0.672084	77.8333	3.65632	0.352648	284.07	19.0513	0.559964	0.00561851	0.338098	283.019	67.525	0.608617	0.00210278	0.23592	1102.23	75.8082
130154059	3	20190508	1	59	169.3	75.2	26.2364	87.2	0.515062	20190508	12.68	0.759	-1.9	-1	3.18	0.582	-2.1	-1.2	1153.11	52.4381	0.302232	3.56805	0.992966	3.13727	0.646016	0.0246747	0.533657	47.051	2.91477	0.671309	0.025534	0.551286	46.8131	11.924	0.656986	0.00682814	0.385048	174.989	11.0619	0.681447	0.00709388	0.401424	174.062	47.2501	0.659601	0.00213663	0.261224	672.897	43.8381
130032197	3	20190322	2	49	166.7	64.5	23.2107	85.9	0.515297	20190322	14.69	1.016	0.4	1.1	4.23	0.826	0.2	1.2	1269.65	73.3611	1.60096	10.8335	0.431733	3.13196	0.727955	0.0232099	0.555026	127.475	3.15704	0.724187	0.0226546	0.542435	128.095	12.1371	0.737042	0.00681754	0.406202	489.163	12.1763	0.735012	0.00678299	0.421488	647.104	56.8992	0.75389	0.00761674	0.296981	2543.76	52.1966
482608		20181017	1	57	171.6	75.6	25.6736	88.5	0.515734	20181017	15.45	0.953	-0.3	0.2	3.4	0.661	-1.5	-0.6	1204.59	59.4502	0.400988	4.38762	0.754092	3.70419	0.659646	0.0212617	0.524956	79.3674	4.68581	0.570395	0.0192495	0.484105	78.5168	14.2651	0.668569	0.00575749	0.373525	299.6	18.2012	0.578127	0.00525134	0.340656	296.294	56.3209	0.671127	0.00181028	0.249713	1162.41	72.1078
120122855	3	20120928	1	47	173.9	72.9	24.1062	89.7	0.515814	20120928	12.79	0.826	-1.3	-0.7	3.19	0.596	-2	-1.3	1145.54	54.194	0.861021	5.88661	0.967996	2.90217	0.683693	0.028286	0.551372	43.1304	3.74526	0.581603	0.025834	0.52043	42.3916	10.8535	0.698829	0.00778006	0.400908	159.822	14.3876	0.590719	0.00706685	0.370708	156.802	42.7649	0.702688	0.00236557	0.269392	614.039	56.529
170098052	3	20200807	2	57	165.9	68.4	24.8521	85.6	0.515973	20200807	11.23	0.784	-1.6	-0.1	3.35	0.666	-1.3	0.2	1205.47	60.2258	0.263342	3.96869	0.758264	2.0344	0.819491	0.0263947	0.593779	80.7427	2.37512	0.789202	0.0241339	0.570033	80.379	7.56734	0.82999	0.00725711	0.433412	305.368	8.95432	0.798898	0.00664642	0.417563	304.01	29.9138	0.831735	0.00223422	0.294137	1187.17	35.5481
130062905		20181121	2	43	166.6	62.7	22.5901	86	0.516206	20181121	8.88	0.738	-2	-0.9	3.07	0.762	-0.4	0.5	1236.22	52.4882	0.352915	3.50067	0.330115	1.61849	0.813992	0.0330938	0.618023	102.596	2.83444	0.661907	0.0270686	0.555244	100.729	6.13511	0.822817	0.00892926	0.460352	390.66	10.8904	0.673093	0.00728469	0.41235	287.068	32.2297	0.680018	0.00279584	0.293019	1125.72	33.7574
313533		20160919	2	52	165.4	64.2	23.4673	85.4	0.516324	20160919	12.77	0.89	-0.7	-0.1	3.28	0.733	-0.7	-0.1	1246.79	60.9251	0.664734	4.90083	0.407236	2.02895	0.809661	0.0287768	0.608087	111.697	2.72314	0.735203	0.0258555	0.564372	111.041	7.64868	0.820655	0.00798476	0.448904	425.938	10.4476	0.746034	0.00738847	0.372855	354.867	53.9167	0.651273	0.00212466	0.248316	1386	51.7632
214600	3	43420	1	48	170.7	70.2	24.0918	88.14	0.516344	43420	13.4	0.856	-1.1	-0.5	4.05	0.724	-1	-0.3	1193.44	163.254	1.85802	6.14532	1.38771	1.3575	0.964508	0.0408378	0.702426	72.6351	3.2002	0.915687	0.0335922	0.647705	71.8744	5.08044	0.967654	0.0183887	0.559999	279.304	12.7327	0.918287	0.0140656	0.502127	276.069	20.2105	0.968166	0.0116908	0.425607	1095.12	51.3058
467921		20191111	2	62	158.2	58	23.1747	81.7	0.516435	20191111	17.62	0.986	0	0.3	4.76	0.868	0.2	0.7	1229.51	61.7222	0.570302	5.95926	0.528556	4.67722	0.572335	0.0193759	0.48525	96.7083	3.98272	0.636392	0.0204727	0.513774	97.0279	18.1972	0.583204	0.00535926	0.342257	367.414	15.5457	0.643918	0.00574813	0.506532	175.527	17.4435	0.806932	0.00397245	0.352942	679.672	16.73
557320	3	20170516	1	47	178.5	79.7	25.0139	92.2	0.516527	20170516	10.79	0.875	-0.8	0.4	3.01	0.659	-1.3	0	1248.84	64.2933	0.414535	3.53706	0.399237	4.38108	0.647694	0.0175749	0.502505	113.201	4.31707	0.643985	0.0186544	0.513219	112.707	16.9689	0.657016	0.0050767	0.350884	432.026	16.8171	0.651602	0.00522635	0.361383	429.909	67.4365	0.65907	0.00180424	0.236211	1686.88	67.0386
140173855		20200714	1	64	181.5	87.1	26.4402	93.8	0.516804	20200618	8.62	0.679	-2.5	-0.5	2.84	0.567	-2.2	-0.5	1137.17	48.4569	0.30054	3.228	0.90139	2.03517	0.731341	0.0352063	0.608781	38.9009	1.81238	0.762734	0.0355741	0.611627	38.8111	7.64322	0.7435	0.00958589	0.452607	143.577	6.67698	0.777466	0.00953317	0.448527	143.336	30.2161	0.746214	0.00283799	0.316278	551.386	26.1825
150069849	3	20190328	1	53	172.3	75.7	25.4991	89.1	0.517121	20190328	16.5	1.028	0.4	0.7	5.42	0.971	1	1.8	1244.1	83.0116	0.169796	3.22903	0.754697	3.93171	0.804512	0.0144297	0.510999	112.042	4.07692	0.789866	0.0148414	0.512505	112.743	15.2512	0.811327	0.00451963	0.369063	428.142	15.9438	0.79541	0.00459031	0.371249	430.643	60.6848	0.812822	0.0019475	0.252038	1673.62	63.9432
408856	3	42838	2	62	159.6	55.62	21.8356	82.54	0.517168	42835	13.33	0.888	-0.8	-0.2	4.07	0.776	-0.6	0.3	1230.8	64.348	0.0117257	2.86531	0.563981	3.51894	0.732917	0.0186219	0.529901	99.5827	4.83623	0.629439	0.0160294	0.47662	98.3937	13.5934	0.739985	0.00525513	0.383026	379.079	18.9933	0.633755	0.00446199	0.5969	181.489	20.5882	0.973538	0.041702	0.522729	736.224	45.6867
130154033	3	20151019	1	28	173.4	72	23.9461	89.7	0.517301	20151019	12.72	0.859	-1.1	-1	4.49	0.912	0.5	0.7	1215.76	46.6481	0.2428	3.74308	0.451574	3.22024	0.541462	0.0284687	0.534992	85.797	3.27311	0.524275	0.0285902	0.534216	85.0984	12.3214	0.551154	0.00778982	0.383976	323.914	12.52	0.534458	0.00791124	0.378172	321.271	48.9643	0.555249	0.00242205	0.258831	1258.26	50.0441
311080		20151202	1	56	177.4	96.8	30.7587	91.8	0.517475	20151202	12.38	0.986	9.55	0.774	-1.7	-0.1	3.61	0.708	-0.9	0.7	1212.7	71.8935	0.805605	5.5127	0.806935	4.24316	0.703612	0.018437	0.49972	85.6164	3.6689	0.739266	0.0194859	0.523173	86.0126	16.663	0.352575	452.853	19.1933	0.697412	0.00562531	0.36356	456.117	79.8598	0.696692	0.00221361	0.243407	1770.63	76.8067
130130015		20190320	2	60	167.3	57.3	20.4721	86.6	0.517633	20190320	7.92	0.646	-2.8	-0.9	3.04	0.65	-1.4	0.2	1133.38	69.305	0.909965	5.03114	0.947699	2.37729	0.838628	0.0225788	0.582111	40.3657	2.56528	0.825212	0.022688	0.575832	40.0227	8.94976	0.84728	0.00624379	0.430274	149.639	9.84913	0.83134	0.00618993	0.418422	148.237	35.4671	0.849254	0.00195804	0.294166	576.881	39.1291
180050886		20190422	2	74	164	61.3	22.7915	84.9	0.517683	20190422	13.96	0.881	-0.9	-0.2	4.59	0.857	0.1	1	1218.91	152.269	1.46687	5.50393	1.45561	1.53162	0.958853	0.0318109	0.699436	90.2555	2.24452	0.939139	0.0282601	0.668554	89.466	5.88934	0.961513	0.0168531	0.55788	347.192	8.78447	0.942057	0.0143975	0.383039	140.371	35.6417	0.802627	0.00222654	0.279451	554.212	46.0569
130041531	3	20130325	1	43	175	77.1	25.1755	90.6	0.517714	20130325	17.93	1.046	0.5	0.7	5.33	0.997	1.2	1.8	1231.29	67.7427	1.00181	7.18036	0.598226	4.13616	0.662256	0.0182148	0.50827	98.4993	6.03901	0.513689	0.0158699	0.469281	97.2768	16.2604	0.668695	0.00505111	0.362862	374.66	23.5034	0.527496	0.00456134	0.331815	369.964	64.846	0.670695	0.00188337	0.240538	1460.85	94.0038
536897		20161031	1	70	173.2	77.7	25.9015	89.7	0.517898	20161031	10.68	0.932	-0.3	0.9	3.38	0.767	-0.3	1.2	1171.29	75.1815	0.435093	3.35817	1.03512	5.44418	0.689838	0.0135259	0.466953	60.8942	4.96217	0.71584	0.0137897	0.48442	60.4905	21.5429	0.692069	0.00385597	0.324973	228.151	19.497	0.719965	0.00393103	0.338047	226.612	85.53	0.694369	0.00141259	0.214259	883.66	77.6034
150090407	3	20190315	1	53	175.8	80.3	25.9823	91.1	0.518203	20190315	10.24	0.687	-2.5	-1.5	3.31	0.568	-2.2	-1.4	1151.97	61.4578	0.838742	5.78651	1.01829	3.17601	0.719751	0.0217778	0.538215	47.5103	4.16026	0.632804	0.0197025	0.49952	46.4638	12.4679	0.725523	0.00591423	0.387919	176.449	16.1717	0.643928	0.00547438	0.355366	172.445	49.3611	0.72824	0.00183875	0.264437	679.935	64.0014
130040561	3	20130322	2	37	162.2	64.2	24.4024	84.1	0.518496	20130322	14.52	1.035	0.6	0.7	3.51	0.732	-0.7	-0.3	1234.85	51.0496	0.182857	3.19443	0.296195	2.36429	0.712558	0.0299058	0.573785	101.471	3.56052	0.55753	0.0263927	0.535078	99.5361	9.21012	0.721867	0.00807469	0.419095	386.132	14.0298	0.566286	0.00710977	0.379396	378.474	36.0173	0.726838	0.00250213	0.290141	1503.27	55.5832
482755	3	20150907	2	48	160.4	60.5	23.5151	83.2	0.518703	20150907	14.78	1.075	0.8	1	4.71	1.059	1.7	2.5	1257.51	67.016	0.570075	4.22614	0.407526	4.28455	0.656316	0.0180035	0.500764	119.738	3.69116	0.70365	0.019117	0.526302	119.293	16.7466	0.664043	0.00521166	0.356115	457.738	14.3605	0.711752	0.00553381	0.385475	363.592	39.0161	0.771116	0.00203179	0.271542	1417.45	44.4547
140108697		20170517	2	43	163.6	64.5	24.0987	84.9	0.518949	20170517	16.9	1.195	2.4	2.3	5.06	1.091	3.3	3.6	1310.1	69.2828	-0.291315	2.86133	0.454827	2.67708	0.792458	0.0300405	0.581723	170.01	3.12962	0.754562	0.0260365	0.544933	169.581	10.5965	0.800748	0.0104552	0.426347	655.72	12.5561	0.761076	0.00918161	0.395929	653.951	42.4694	0.801855	0.00514371	0.303571	2576.22	50.4495
483722		20171011	2	52	165.8	66.6	24.2273	86.1	0.5193	20171011	10.47	0.805	-1.1	-0.4	2.97	0.585	-2.3	-0.8	1180.61	73.6898	1.29274	7.55872	1.06687	2.83279	0.799827	0.0228157	0.561655	64.7148	3.99459	0.71667	0.0202062	0.521566	63.6555	10.9226	0.807628	0.00646715	0.410385	243.685	15.6852	0.723033	0.00567304	0.376351	239.476	43.0958	0.810842	0.00215982	0.28135	944.552	62.6809
495491	3	20150413	1	46	170.8	76.4	26.1889	88.7	0.519321	20150413	10.5	0.795	-1.6	-0.9	2.55	0.657	-1.5	-0.9	1185.48	69.4225	0.169325	3.48247	0.95181	5.6328	0.619786	0.0147941	0.463931	67.8636	6.99643	0.517791	0.0141046	0.437638	66.9804	22.0312	0.625751	0.00441343	0.328857	255.781	27.6346	0.521108	0.00412111	0.305496	252.112	87.6934	0.627271	0.00176982	0.218524	993.164	110.484
476674	3	20190725	2	57	159.2	62.8	24.7784	82.7	0.519472	20190725	11.2	0.934	-0.3	0.9	3.18	0.711	-0.9	0.6	1256.9	72.6913	0.267931	2.91372	0.500216	1.49673	0.903906	0.0274086	0.639312	123.07	1.79591	0.883806	0.0252504	0.615892	122.171	5.61802	0.910746	0.00817848	0.48444	471.711	6.84414	0.890547	0.0073362	0.46182	468.311	22.0635	0.912785	0.00285318	0.347125	1846.12	27.0251
547294	3	20180903	2	65	169.2	75.1	26.2325	87.9	0.519504	20180903	13.02	0.905	-0.7	-0.2	3.99	0.82	-0.2	0.5	1110.83	71.625	1.09968	6.06813	0.7722	3.75152	0.746773	0.0202812	0.537708	30.0379	4.28582	0.707967	0.0191525	0.512246	29.3498	14.628	0.75296	0.00590909	0.388642	109.592	16.7851	0.713957	0.0056665	0.364077	106.916	58.2932	0.754731	0.00210514	0.262411	419.135	66.9893
160090183	3	20200605	1	50	173.3	84.8	28.2357	90.1	0.519908	20200605	15.04	0.964	15.55	1.055	0.6	0.8	4.08	0.858	0.1	0.9	1234.56	67.1069	0.0990129	3.2288	0.559808	4.31669	0.697298	0.0156731	0.491993	102.618	3.93144	0.718377	0.0165897	0.497521	102.507	16.7056	0.382553	318.297	17.3218	0.544714	0.00588979	0.351595	312.419	51.8331	0.660577	0.00230074	0.256332	1235.38	69.0356
510377	3	20190618	1	48	167.7	63	22.4014	87.2	0.519976	20190618	12.04	0.832	-1.2	-0.4	2.81	0.572	-2.2	-1.4	1178.99	142.046	2.49332	11.3118	1.29584	1.47005	0.952836	0.0315652	0.680975	64.902	1.93534	0.935703	0.0313016	0.675956	63.0012	5.47005	0.957044	0.012022	0.526356	247.839	7.48645	0.938966	0.0109814	0.354743	355.387	61.1497	0.697342	0.00191472	0.236121	1385.15	66.3228
170072777	2	43252	2	35	165.9	64.1	23.2898	86.38	0.520675	43252	15.98	1.07	0.7	1	4.37	0.903	0.5	1.4	1271.63	84.0229	0.537956	3.94544	0.678304	3.4152	0.807787	0.0196813	0.552419	132.839	3.32432	0.811455	0.019953	0.557581	132.613	13.2269	0.816889	0.00770835	0.406545	510.342	12.9318	0.819331	0.00771333	0.633672	703.374	16.0744	0.948551	0.0947681	0.522477	2809.71	15.3998
230724	3	20181121	2	57	170.1	79.5	27.4763	88.6	0.52087	20181121	10.77	0.813	-1.3	0.1	3.6	0.735	-0.6	0.9	1191.13	53.0421	0.0542879	3.74614	0.836601	2.97274	0.662188	0.0256901	0.539234	69.4512	2.77417	0.684285	0.0271182	0.564913	69.5519	11.5108	0.670588	0.00691115	0.381564	262.006	10.6962	0.693742	0.00737534	0.404538	262.448	45.6714	0.672628	0.002255	0.257162	1014.32	42.3478
130125664		20131212	2	61	164.9	64.9	23.8673	85.9	0.520922	20130917	10.24	0.825	-1.2	0.4	3.19	0.652	-1.4	0.3	1189.64	46.2809	0.241907	3.70769	0.779943	1.10974	0.835072	0.0463164	0.663582	68.7688	1.07647	0.841595	0.0472955	0.673475	68.3261	3.94545	0.851641	0.0129803	0.50565	258.469	3.85033	0.856499	0.0131257	0.512831	256.677	15.2532	0.855319	0.00381852	0.362572	1000.3	14.7412
270487	3	20171023	2	47	158.7	61.2	24.2995	82.7	0.521109	20171023	9.2	0.732	-2.1	-1.4	2.61	0.626	-1.7	-1.1	1175.39	62.8602	0.812259	5.92906	1.00775	2.50427	0.783085	0.0237968	0.573319	61.0915	2.24054	0.808029	0.0246034	0.582094	61.0147	9.6128	0.790728	0.00670211	0.425199	228.791	8.64286	0.813809	0.00690261	0.42707	228.463	38.1305	0.79248	0.00212374	0.28907	886.273	34.2576
190040161	3	20190409	2	57	167.7	77.6	27.5928	87.4	0.521169	20190409	10.44	0.751	-1.9	-0.3	3.3	0.676	-1.2	0.3	1163.9	57.5434	-0.0570098	3.0748	0.98986	2.65811	0.752988	0.0231483	0.553797	54.0196	3.62551	0.653418	0.0208512	0.513092	53.9433	10.3358	0.757953	0.0063477	0.3941	201.624	14.2861	0.656244	0.00571774	0.359324	201.218	40.6547	0.76014	0.00207542	0.26926	778.384	56.2456
170022332		20190111	2	47	156.7	58.7	23.9056	81.7	0.521378	20190111	8.93	0.687	-2.4	-1.8	2.45	0.502	-2.8	-2.3	1212.99	56.8396	0.86501	7.05358	0.636626	1.40994	0.841915	0.0362607	0.638665	84.9363	1.73032	0.807251	0.0332608	0.606267	83.8361	5.20117	0.85434	0.00999692	0.482691	322.209	6.31962	0.824141	0.00917839	0.452224	317.988	20.2363	0.857472	0.00302657	0.339766	1251.72	24.6533
476477		20181217	2	55	167.3	63	22.5086	87.3	0.521817	20181217	8.4	0.606	-3.2	-1.1	2.6	0.563	-2.2	-0.5	1220.57	172.643	0.859385	3.2022	1.5088	1.45845	0.970699	0.0452719	0.718491	97.6461	3.57173	0.928244	0.0368376	0.657587	95.2148	5.63296	0.972703	0.0323758	0.590564	378.629	14.4165	0.930126	0.0254259	0.403313	409.702	24.4257	0.843101	0.00254574	0.311606	1606.53	41.8114
130156374		20180123	2	50	165	57.4	21.0836	86.1	0.521818	20180123	15.4	1.042	0.6	1	3.64	0.767	-0.3	0.3	1228.24	64.5744	0.113098	3.16936	0.598567	3.44323	0.739414	0.0186522	0.528887	97.7134	4.65014	0.64374	0.0167585	0.475921	97.0331	13.3871	0.744133	0.00529137	0.378453	371.324	18.2149	0.647759	0.00477635	0.332262	368.745	53.4419	0.745162	0.00185923	0.256381	1446.98	72.5179
120063707	3	43733	2	48	160.4	66.3	25.7694	83.7	0.52182	43733	11.68	0.829	-1.2	-0.7	2.78	0.539	-2.5	-1.9	1144.47	130.274	2.21812	9.00906	1.0934	1.22244	0.961468	0.0322008	0.699993	50.0068	1.87897	0.940064	0.0306142	0.664564	48.2599	4.5639	0.9647	0.0111543	0.555494	189.713	7.23313	0.943597	0.00986749	0.512059	182.727	18.0634	0.965456	0.00571565	0.414336	738.649	28.752
160078309		20181119	2	38	161.9	57.6	21.975	84.5	0.521927	20181119	12.02	0.746	-2	-1.6	4.66	0.855	0.1	0.4	1248.1	52.2905	0.31494	3.76194	0.248962	2.12039	0.747242	0.0299905	0.582511	112.545	3.26956	0.610794	0.0254802	0.524318	110.971	8.12763	0.756554	0.00818386	0.429074	429.281	12.8488	0.615255	0.00696754	0.4576	577.082	28.7351	0.842405	0.00310753	0.315772	2264.97	29.6844
378597	3	20161118	1	66	178.7	80.1	25.0832	93.3	0.522104	20161118	13.69	0.896	-0.7	-0.1	3.9	0.74	-0.9	0.2	1190.16	57.4855	0.0288775	2.8899	0.870864	4.45739	0.581694	0.0190147	0.495524	69.1557	4.65185	0.560995	0.0182197	0.477924	68.5499	17.2097	0.591503	0.00528215	0.350835	259.938	18.147	0.567017	0.00497496	0.332686	257.487	68.246	0.59456	0.00175426	0.234605	1007.7	72.1738
130171566	3	20191108	1	53	169.5	63.4	22.0673	88.5	0.522124	20191108	13.6	0.966	0	0.1	3.77	0.797	-0.1	0.3	1287.78	60.0634	1.292	5.35792	0.269784	1.38482	0.830329	0.0389686	0.64624	144.087	1.81351	0.773134	0.035935	0.619752	142.934	5.02642	0.848977	0.0124154	0.498371	553.998	6.88311	0.788709	0.0105707	0.360269	254.562	41.0336	0.738343	0.00229217	0.275728	994.126	58.6561
499702	3	20171106	2	54	164.9	61.8	22.7273	86.1	0.522135	20171106	13.31	0.849	-1	0.4	3.65	0.702	-0.9	0.6	1220.3	171.27	1.3887	4.91622	1.52788	1.14067	0.975754	0.0428594	0.724195	91.7656	2.05743	0.955127	0.036899	0.696019	89.9445	4.17177	0.978368	0.0257114	0.586923	354.825	7.9556	0.957542	0.0207692	0.373326	440.241	48.0746	0.711447	0.0023356	0.249757	1722.27	55.6143
469055		20181102	2	49	159.3	64	25.2202	83.2	0.522285	20181102	13.53	1.056	0.8	1.1	3.59	0.824	0.2	0.8	1264.53	56.8249	-0.0427501	3.62436	0.260916	1.88944	0.811333	0.0287735	0.611598	126.761	2.83055	0.717468	0.0233032	0.542439	126.448	7.07833	0.820842	0.00813642	0.456714	485.234	10.7191	0.728432	0.00658332	0.393834	484.019	27.7761	0.82372	0.00250247	0.319976	1896.51	42.3384
200003784		20200618	1	46	175.9	92.5	29.8958	91.9	0.522456	20200619	11.75	0.65	10.64	0.827	-1.2	0.4	3.39	0.675	-1.2	0.5	1249.16	141.056	2.78988	14.9387	1.26274	0.945294	0.963186	0.0364685	0.714049	107.266	1.6025	0.934474	0.0312012	0.666561	104.345	3.36529	0.522943	121.897	4.31065	0.736431	0.0193188	0.517918	121.248	15.5775	0.770676	0.00525654	0.369947	465.474	16.7046
495491	3	20140717	1	45	170.8	76.4	26.1889	89.3	0.522834	20140723	9.05	0.752	-1.9	-1.3	3.64	0.685	-1.3	-0.7	1180.93	71.3324	0.225318	3.41094	0.977764	6.64556	0.586754	0.0133013	0.452781	64.7969	7.9818	0.499497	0.0126532	0.430514	64.4458	25.9293	0.593124	0.00404962	0.311219	243.888	31.4839	0.502041	0.00391399	0.293184	242.309	103.035	0.594147	0.00167449	0.199131	943.779	125.209
150135553		20151021	1	39	181.1	87.4	26.6486	94.7	0.522916	20151021	16.75	1.041	0.5	0.6	4.44	0.772	-0.6	-0.1	1260.6	59.9333	0.18738	3.82273	0.309065	3.58311	0.66769	0.0199717	0.516412	123.435	4.24729	0.60786	0.0186884	0.497389	122.783	13.8128	0.678058	0.00561267	0.364842	470.582	16.5305	0.616622	0.00537232	0.353365	467.896	54.8905	0.681511	0.00189646	0.245318	1840.53	65.9993
475992	3	20181224	2	56	158.5	60.8	24.2017	82.9	0.523028	20190124	9.14	0.698	-2.1	-0.8	1.55	0.569	-2.5	-0.8	1184.84	55.7754	0.558513	4.2557	0.930315	2.26982	0.766255	0.0277685	0.583178	66.5955	2.00102	0.794285	0.0289275	0.593356	66.6281	8.37398	0.781142	0.00797671	0.430539	249.308	7.40612	0.806686	0.00824813	0.438328	249.432	32.9543	0.78415	0.00241568	0.293625	966.118	28.8832
130159232		20151002	1	37	173.6	82.4	27.3418	90.8	0.523041	20151002	13.74	0.89	-0.8	-0.5	4.24	0.809	-0.3	0.1	1220.58	63.5706	0.159927	4.13441	0.573855	3.42344	0.72875	0.0216162	0.524281	91.5789	4.11532	0.66557	0.0203313	0.499985	91.1604	13.1316	0.736146	0.00609318	0.374116	346.9	15.8294	0.673852	0.00598256	0.357816	345.297	51.9115	0.737772	0.00207327	0.250451	1349.51	62.7447
140129029		20171012	2	52	153.7	59.8	25.3136	80.4	0.523097	20171012	6.59	0.611	-2.9	-2	2.9	0.608	-2	-0.6	1194.09	39.1632	-0.0133862	3.27668	0.635637	1.35714	0.721623	0.0491282	0.63699	70.4586	1.39714	0.714452	0.0484402	0.635914	69.864	4.99093	0.741112	0.0131427	0.478136	265.123	5.16	0.733024	0.013263	0.479555	262.742	19.7103	0.74502	0.00378443	0.334235	1027.07	20.304
402386	3	20150918	2	52	163.6	63.4	23.6877	85.6	0.523227	20150918	9.81	0.722	-2.1	-1	2.84	0.595	-1.9	-1.1	1202.64	62.2518	0.338408	3.30025	0.791368	2.40847	0.805221	0.0236301	0.569177	79.5812	3.21909	0.740354	0.0204307	0.525912	78.5589	9.11957	0.813894	0.00658287	0.418158	300.647	12.4209	0.747259	0.00576068	0.37968	296.624	36.1527	0.815531	0.00211291	0.286039	1168.06	49.345
488700	3	20161012	1	51	176.2	77.7	25.027	92.2	0.523269	20161012	12.29	0.837	-1.2	-0.6	4.07	0.761	-0.7	0.1	1215.24	66.2674	0.206028	3.27975	0.718212	5.64147	0.594157	0.0151325	0.46788	87.1596	4.32078	0.688582	0.0166377	0.49135	87.8799	22.0853	0.598998	0.00435754	0.330566	330.229	16.6318	0.69752	0.00480604	0.348323	333.225	88.4199	0.599499	0.0015816	0.219893	1282.64	66.4234
547354	3	20161013	1	44	176.7	88.6	28.3766	92.5	0.523486	20161013	8.83	0.701	14.92	1.053	0.7	0.8	4.13	0.805	0	0.5	1237.86	57.3269	0.441502	3.22702	0.387316	3.35382	0.674443	0.0214333	0.521638	103.606	3.31987	0.680247	0.0211642	0.522805	103.613	12.8738	0.400609	176.731	9.14219	0.623973	0.00993094	0.415502	175.3	37.7058	0.618763	0.00292808	0.273072	679.311	36.208
120063707	3	43340	2	47	160.4	66.3	25.7694	83.98	0.523566	43340	11.58	0.83	-1.2	-0.7	3.17	0.61	-1.8	-1.3	1128.82	129.411	2.72359	12.8465	0.989732	1.16008	0.959525	0.0373912	0.70415	41.7589	2.12121	0.925937	0.0346536	0.67445	40.0657	4.23814	0.964087	0.0128146	0.561799	158.175	8.2404	0.930237	0.0115111	0.525324	151.436	16.7796	0.964878	0.00614367	0.427734	613.382	32.9293
113243	3	20200521	2	59	160.8	61.1	23.6303	84.2	0.523632	20200521	10.91	0.918	-0.4	0.4	3.46	0.761	-0.4	0.5	1220.07	48.6324	-0.348564	4.20468	0.392673	1.7105	0.775551	0.0387546	0.622593	90.1379	2.33457	0.687432	0.0334659	0.57185	89.6	6.4316	0.786323	0.010569	0.465568	341.062	8.92234	0.697802	0.0090782	0.377092	374.076	37.5296	0.82485	0.00218577	0.292139	1478.14	57.6592
530437		20190729	2	71	166.5	65.6	23.6633	87.2	0.523724	20190729	11.58	0.849	-1.1	0	3.54	0.693	-1	0	1176.88	68.5205	0.231667	3.24309	0.966855	3.05123	0.796623	0.0192411	0.547588	63.8838	4.05814	0.732097	0.0176838	0.524934	63.141	11.7727	0.802164	0.00552838	0.39413	239.902	15.7631	0.737663	0.00504284	0.376815	237.02	46.6255	0.803793	0.0019417	0.262522	929.432	62.1853
150065076		20190531	1	49	173.1	93.4	31.1711	90.7	0.523975	20190531	14.3	0.882	-0.9	-0.3	4.51	0.814	-0.3	0.4	1189.67	61.3909	0.250471	3.46028	0.87293	5.82628	0.514535	0.0171343	0.461299	68.2147	5.10641	0.573333	0.0181492	0.491216	68.4474	22.7731	0.519281	0.00474523	0.322254	257.039	19.8481	0.57936	0.00505835	0.342788	257.928	90.6154	0.521232	0.00165187	0.211894	996.296	78.659
150119401		20170928	2	46	163.9	58	21.5909	85.9	0.5241	20170928	11.35	0.836	-1.2	-0.2	3.03	0.6	-2	-0.7	1195.36	61.9997	0.56668	4.03281	0.888341	2.12542	0.818709	0.0256988	0.584957	73.2727	3.32376	0.71442	0.0217293	0.533654	72.9341	7.972	0.82873	0.00699606	0.42862	276.378	13.0828	0.716884	0.00590075	0.482169	699.13	19.6409	0.837615	0.015978	0.40766	2769.24	31.5824
170072845	3	20190605	2	56	167.7	66.7	23.717	87.9	0.52415	20190605	10.17	0.71	-2.2	-0.8	2.57	0.531	-2.5	-1.4	1160.54	47.3726	0.521745	6.03519	1.01384	1.55556	0.779053	0.0406204	0.622477	51.0232	1.62006	0.770259	0.0405705	0.624308	50.7994	5.66272	0.796408	0.0112517	0.468474	189.861	6.0914	0.781326	0.0110741	0.464274	188.863	22.1279	0.800014	0.00325097	0.33015	731.558	23.8454
248242		20161201	2	49	165.9	59.4	21.5821	87	0.524412	20161201	11.73	0.844	-1.1	0.3	3.6	0.721	-0.8	0.6	1159.42	61.1796	0.185698	3.28153	1.00701	2.77607	0.763177	0.0214413	0.541964	52.3055	3.68754	0.692957	0.0188974	0.499897	51.998	10.734	0.768152	0.00608753	0.387282	194.674	14.3192	0.698216	0.00540489	0.507463	746.217	27.3277	0.8287	0.0291879	0.402008	2938.64	31.7366
130032184	3	20130308	1	51	172.1	74.4	25.1195	90.3	0.524695	20130308	15.28	0.926	-0.5	0	4.12	0.801	-0.4	0.4	1216.33	56.3842	0.384833	3.41748	0.589592	2.57875	0.746116	0.0250289	0.565516	88.0144	3.50407	0.646028	0.0224714	0.523356	86.9568	10.155	0.748568	0.00693281	0.40642	332.998	13.8787	0.647318	0.00615105	0.365655	328.839	40.1812	0.751135	0.00223047	0.277412	1296.58	55.0163
130130015	3	20190320	2	60	163.1	59.7	22.4423	85.6	0.524831	20190320	15.21	0.904	-0.7	0	3.9	0.643	-1.6	-0.7	1215.13	132.056	1.23362	4.36197	1.37664	1.36218	0.960957	0.0310523	0.681065	90.6269	2.16494	0.937836	0.0271592	0.646435	90.4041	5.07421	0.964549	0.0146911	0.537536	348.604	8.49965	0.940456	0.0122869	0.418422	148.237	35.4671	0.849254	0.00195804	0.294166	576.881	39.1291
120122855		20120928	1	47	172.2	81.3	27.4173	90.4	0.524971	20120928	12.79	0.826	-1.3	-0.7	3.19	0.596	-2	-1.3	1145.54	54.194	0.861021	5.88661	0.967996	2.90217	0.683693	0.028286	0.551372	43.1304	3.74526	0.581603	0.025834	0.52043	42.3916	10.8535	0.698829	0.00778006	0.400908	159.822	14.3876	0.590719	0.00706685	0.370708	156.802	42.7649	0.702688	0.00236557	0.269392	614.039	56.529
130138224		20191015	1	40	180.9	91.1	27.8382	95	0.525152	20191015	14.17	0.999	0.1	0.4	4.23	0.759	-0.7	-0.2	1208.75	75.9093	-0.0321889	3.15958	0.80892	5.04286	0.720041	0.0138259	0.486494	85.5532	10.7393	0.404147	0.0104691	0.391904	82.2925	19.9167	0.723782	0.00403502	0.341987	324.902	42.7933	0.407296	0.00322135	0.264018	311.956	79.5817	0.723702	0.00159864	0.227163	1263.43	170.743
459886	3	20181107	1	60	170.6	62	21.3027	89.6	0.525205	20181107	13.31	0.807	-0.8	-0.5	3.57	0.707	-1.3	-0.2	1167.61	50.5824	0.8043	5.66304	1.00328	2.30201	0.71212	0.0331898	0.579794	54.8322	2.80476	0.640411	0.0309297	0.547679	54.2048	8.78369	0.723946	0.00894419	0.425428	204.876	10.8071	0.651485	0.00832908	0.393837	202.351	34.484	0.726565	0.002698	0.291791	789.896	42.4369
140147616	3	20161124	1	54	173.4	84.3	28.0369	91.1	0.525375	20161124	15.35	1.102	6.59	0.611	-2.9	-2	2.9	0.608	-2	-0.6	1194.09	39.1632	-0.0133862	3.27668	0.635637	1.35714	0.721623	0.0491282	0.63699	70.4586	1.39714	0.714452	0.0484402	0.635914	69.864	4.99093	0.353258	394.368	20.3559	0.610944	0.0048757	0.345439	389.958	63.0345	0.709246	0.00181105	0.233796	1541.14	81.1857
120079869		20130612	1	42	178.5	94.8	29.7531	93.8	0.52549	20130612	13.92	0.888	18.98	1.23	2	2	5.88	1.218	3	3.8	1310.68	74.4192	0.523846	4.15823	0.478634	4.01452	0.669047	0.0240784	0.530887	165.003	3.57206	0.700178	0.0260366	0.55058	165.544	16.0069	0.423877	239.865	12.336	0.576274	0.00822269	0.371009	237.61	37.1446	0.680835	0.00276264	0.293233	929.241	48.7198
241672		20200327	2	69	167.8	63	22.3747	88.2	0.525626	20200327	12.46	0.901	-0.6	-0.3	3.17	0.662	-1.3	-0.8	1215.24	48.5762	0.000669452	3.22632	0.504798	1.93929	0.74829	0.0322945	0.595605	86.7357	2.51342	0.665562	0.0293682	0.562443	86.2171	7.11964	0.763838	0.00891865	0.443864	327.707	9.34109	0.681981	0.00818645	0.433224	111.23	33.1618	0.822322	0.0022629	0.296188	423.008	32.2159
150058232	3	42872	1	41	173.4	76.5	25.4427	91.17	0.525779	42872	12.86	0.808	-1.5	-1	3.51	0.668	-1.4	-0.9	1181.42	119.686	2.47164	11.479	1.26011	0.941176	0.960278	0.033083	0.70463	65.2124	1.46154	0.935207	0.0314969	0.677816	62.6048	3.3719	0.965134	0.0113649	0.555194	248.004	5.48342	0.940456	0.0101193	0.528462	237.621	12.9882	0.966671	0.00510402	0.41765	966.475	21.681
190091903		20190724	1	47	172.5	82.6	27.7589	90.7	0.525797	20190724	17.06	1.138	1.3	1.4	5.22	0.99	1.2	1.8	1269.53	75.6132	0.353218	3.38461	0.53912	3.82569	0.747792	0.017907	0.53015	131.396	5.40767	0.642632	0.0149954	0.474592	130.645	15.0271	0.755257	0.00570216	0.384175	503.681	21.6125	0.646965	0.0047615	0.330691	500.587	60.1792	0.757092	0.00273823	0.267121	1972.65	87.076
130041531		20130325	1	43	178	95.9	30.2676	93.6	0.525843	20130325	17.93	1.046	7.88	0.691	-2.4	-0.9	3.14	0.719	-0.8	0.5	1183.2	54.5408	0.144906	2.94559	0.898772	2.1526	0.77497	0.0271117	0.571385	65.0656	2.48301	0.738845	0.0256534	0.563906	64.9817	8.00909	0.362862	374.66	23.5034	0.527496	0.00456134	0.331815	369.964	64.846	0.670695	0.00188337	0.240538	1460.85	94.0038
150130574		20151013	1	35	173.6	97.9	32.485	91.3	0.525922	20151013	14.06	0.882	-0.9	-0.6	4.41	0.878	0.3	0.6	1220.4	56.5875	0.198403	3.5867	0.563125	2.66024	0.735203	0.0253696	0.564309	90.6466	3.9229	0.600646	0.0215233	0.505746	89.6468	10.2286	0.744055	0.00694332	0.405274	343.191	15.5334	0.601973	0.0059196	0.352536	339.063	40.599	0.745735	0.00217331	0.273997	1335.97	61.4841
120073331	3	41106	2	43	146.1	43.6	20.4261	76.84	0.525941	41094	8.87	0.786	-1.6	-1.2	3.04	0.669	-1.3	-0.7	1196.21	104.29	1.95888	7.00131	1.28379	0.757818	0.968274	0.0624497	0.772667	75.6378	0.892113	0.960493	0.0579449	0.743663	74.4353	2.56582	0.974147	0.0220123	0.635148	288.441	3.13467	0.966036	0.0202222	0.602525	283.941	9.71345	0.975913	0.00902823	0.493193	1125.08	12.1399
130171618	3	20190902	1	78	177	83	26.493	93.1	0.525989	20190902	18.13	1.13	1.2	1.4	4.31	0.816	-0.2	1.2	1215.98	80.5972	3.02922	27.2253	0.770943	3.1045	0.765641	0.0210212	0.55267	86.5897	2.79825	0.788452	0.0210112	0.552905	86.6033	12.0121	0.773982	0.00584039	0.40057	328.681	10.7427	0.797537	0.00582183	0.403018	328.743	47.6096	0.776104	0.00184927	0.274936	1279.28	42.7325
482608	3	20140918	1	53	178.9	82.2	25.6833	94.1	0.525992	20140918	16.59	1.002	0.1	0.5	3.53	0.698	-1.2	-0.4	1230.96	60.3635	0.846896	7.21431	0.506008	2.46636	0.755398	0.0253736	0.563224	98.0659	4.21245	0.577513	0.0207767	0.496201	97.0417	9.43227	0.766882	0.00698347	0.412418	372.733	16.4052	0.589652	0.00564336	0.350688	368.544	37.1477	0.770971	0.00212355	0.283818	1453.46	65.3837
493291	3	20190701	2	64	168.9	62.3	21.8388	88.9	0.526347	20190701	11.47	0.666	-1.9	-1.6	2.65	0.501	-3.6	-2.7	1114.85	141.389	1.79088	7.12209	1.04237	1.59096	0.959657	0.0685817	0.715404	43.8342	2.87212	0.924435	0.0696999	0.69344	41.3627	6.12578	0.9623	0.0366246	0.588321	166.33	11.3889	0.927272	0.0373485	0.401929	303.697	31.3442	0.758547	0.00268386	0.292762	1185.4	41.7132
150078306		20200720	1	32	181.4	91	27.6546	95.6	0.527012	20200720	16.52	1.029	0.4	0.4	4.42	0.804	-0.3	-0.1	1255.68	67.9164	0.653179	4.71595	0.465271	4.59721	0.634228	0.0180811	0.500179	117.061	4.87395	0.608046	0.0172157	0.485787	117.064	17.7812	0.648366	0.00540349	0.359969	448.183	19.0616	0.619134	0.00509419	0.342424	447.996	70.161	0.653955	0.00202261	0.2426	1753.17	75.8186
538043		20181122	2	76	167.7	68.7	24.4282	88.4	0.527132	20181106	15.12	0.757	-1.6	0.4	2.01	0.389	-4.5	-1.2	1123.91	45.6036	0.641255	3.84811	0.762107	1.53452	0.763808	0.0419926	0.650181	32.2024	1.41063	0.787989	0.0412933	0.642291	32.8213	5.64762	0.778749	0.0121712	0.486551	117.821	5.29589	0.79734	0.0115376	0.479997	120.136	21.9976	0.784637	0.00396542	0.350481	450.306	20.6135
478769	2	41592	1	43	167	63.5	22.7688	88.04	0.527186	41563	15.18	0.925	-0.5	0.1	4.67	0.833	-0.1	0.9	1207.37	63.5868	0.154981	3.67094	0.75966	4.68906	0.626693	0.0173866	0.490283	81.5911	4.42909	0.649455	0.0176874	0.492998	81.5055	18.2224	0.632639	0.00482096	0.343207	308.072	17.0178	0.659192	0.00486182	0.490451	345.148	19.5443	0.911825	0.00263334	0.359002	1342.62	20.0189
150065157	3	20190725	2	56	165.4	71	25.953	87.2	0.527207	20190725	9.46	0.779	-1.6	-0.2	2.61	0.567	-2.2	-0.9	1205.06	43.2278	0.846242	5.84366	0.510007	1.03049	0.82484	0.0531745	0.66299	78.6818	1.13566	0.794914	0.0546566	0.672084	77.8333	3.65632	0.842162	0.0150036	0.502778	296.677	4.06257	0.813401	0.0153604	0.512952	293.276	14.3603	0.84485	0.00415005	0.354864	1152.12	15.6844
130100061	3	20151030	1	45	169.2	73.9	25.8133	89.3	0.527778	20151030	22.62	1.308	2.7	2.6	6	1.09	2	2.6	1312.21	66.8237	-0.342219	4.42863	0.472174	2.67687	0.769622	0.0330208	0.585313	169.312	3.20455	0.717469	0.0284661	0.553098	168.911	10.4211	0.781082	0.0122923	0.435226	654.189	12.6143	0.728432	0.00989517	0.405493	652.34	42.0239	0.78296	0.00706154	0.315629	2571.17	50.8686
130096450		20151001	1	39	172.8	94.8	31.7483	91.2	0.527778	20151001	14.31	0.879	-0.9	-0.5	3.23	0.673	-1.4	-0.9	1250.15	61.23	0.275279	3.64366	0.371922	4.42176	0.609543	0.0182757	0.493088	114.023	4.49644	0.594937	0.0183546	0.486455	113.015	17.4104	0.614688	0.00518708	0.345829	434.852	17.3421	0.609257	0.00515065	0.339187	431.018	69.7034	0.615293	0.00188584	0.225369	1697.11	69.3201
150154055		20191203	1	53	178.1	95	29.9499	94	0.527793	20191203	13.71	0.954	10.21	0.758	-1.9	-1	3.07	0.676	-1.4	-0.5	1147.79	64.69	0.220159	3.13848	0.983604	4.41527	0.668879	0.0172647	0.496259	45.9251	3.82805	0.708422	0.0185239	0.510655	45.8957	17.1947	0.355672	459.655	17.6093	0.641286	0.00522771	0.346905	457.189	61.6644	0.695452	0.0019183	0.235372	1795.7	69.4494
120006913	3	20180627	1	25	169.1	63.9	22.3467	89.3	0.52809	20180627	9.19	0.682	-1.8	-1	4.16	0.709	-1.3	0.3	1117.01	59.7539	0.137554	2.92195	0.799447	3.62789	0.674902	0.0199935	0.521223	31.1925	3.93172	0.646412	0.0192761	0.506142	30.951	14.134	0.680351	0.00567079	0.36797	113.922	15.0676	0.657746	0.00548014	0.433877	610.257	26.6355	0.792856	0.00378596	0.326975	2412.55	32.7419
170034265		20170315	2	56	163.6	65.9	24.6217	86.4	0.528117	20170315	8.79	0.773	-1.7	-0.4	2.62	0.611	-1.8	-0.6	1182.03	71.4428	0.886063	4.66156	1.03748	3.12822	0.795678	0.0192381	0.537632	66.0779	3.18939	0.785649	0.0198146	0.5437	65.7576	12.0842	0.802947	0.00554067	0.390528	249.544	12.4179	0.79188	0.00551921	0.396194	248.139	48.149	0.804495	0.00189272	0.263792	968.573	49.4583
111132	3	20180104	2	56	164.7	75.1	27.6855	87	0.528233	20180104	10.89	0.842	-1.1	0.1	3.59	0.653	-1.4	-0.2	1196.57	73.291	0.211384	2.96158	0.907149	3.66828	0.782945	0.0158925	0.526928	77.3927	3.6438	0.784316	0.0155942	0.52299	76.6812	14.2798	0.788334	0.00454455	0.382254	292.92	14.1601	0.78993	0.00448025	0.376535	290.177	56.7625	0.789327	0.00164977	0.259299	1136.52	56.0596
214600	3	43955	1	50	170.7	70.2	24.0918	90.17	0.528237	43943	13.36	0.892	-0.8	-0.2	3.87	0.709	-1.1	-0.4	1184.48	148.615	1.82389	6.82444	1.34876	1.10209	0.970528	0.0326605	0.724601	70.7087	3.13468	0.915423	0.0257726	0.653098	69.8181	3.98775	0.973961	0.0138866	0.576713	271.623	12.5557	0.917153	0.0100046	0.50599	267.834	15.6397	0.974729	0.00859804	0.43901	1063.27	50.5721
381654	3	20150508	2	57	167.7	72.1	25.6371	88.6	0.528324	20150508	10.07	0.799	-1.5	0	2.75	0.558	-2.3	-0.9	1173.11	59.4554	0.339712	2.92359	0.980631	2.60355	0.768735	0.0232243	0.563722	59.9737	3.60207	0.681045	0.0201536	0.520168	59.0012	9.7357	0.782512	0.00652986	0.410091	224.805	13.9206	0.690065	0.00562974	0.368813	220.947	38.5675	0.783912	0.0020756	0.275798	869.894	55.4255
130033332		20130311	2	49	160.5	57.3	22.2436	84.8	0.528349	20130311	12.25	0.7	-1.6	-1.2	3.29	0.576	-2.7	-1.5	1133.47	66.0047	1.69197	9.0581	0.876475	2.56742	0.800987	0.0282687	0.572685	39.4832	2.23173	0.822133	0.0297047	0.592389	38.9693	9.81523	0.809336	0.00783262	0.424081	145.812	8.42544	0.831734	0.00813845	0.381144	441.18	36.848	0.763681	0.00241949	0.282898	1735.6	49.8003
140163616	3	20151123	1	56	174.4	79.9	26.2696	92.2	0.52867	20151123	11.82	0.849	-1.1	-0.5	3.41	0.728	-1	-0.1	1161.96	61.0813	0.278387	3.6743	1.00699	4.18603	0.648807	0.0185619	0.497442	52.9846	6.21951	0.466432	0.016654	0.453199	51.8566	16.2853	0.655045	0.00534926	0.353318	197.056	24.3636	0.471461	0.00492241	0.312558	192.461	64.4772	0.657944	0.00195069	0.234909	761.351	96.9837
111356		20180402	1	69	175.5	97.6	31.6881	92.8	0.528775	20180402	8.8	0.665	-2.7	-1.3	2.76	0.547	-2.4	-1.3	1210.1	50.3588	0.183885	3.44352	0.555808	2.34991	0.710985	0.0295439	0.568284	82.4522	2.19554	0.729039	0.0308203	0.576492	82.2487	8.96402	0.721275	0.00798064	0.413176	311.78	8.28097	0.741437	0.00848281	0.419921	310.925	35.3201	0.724047	0.00241944	0.286584	1211.82	32.6203
450455	3	20181221	1	58	172.3	81.1	27.3181	91.2	0.529309	20181221	13.09	0.908	-0.6	-0.1	3.82	0.715	-1.1	-0.1	1131.83	65.4537	0.142265	2.90058	0.930408	4.25969	0.678998	0.0165864	0.492167	38.4425	5.57532	0.577583	0.0151105	0.462886	37.3	16.8986	0.682727	0.00481992	0.353096	141.933	21.9922	0.58567	0.00433294	0.322945	137.597	67.2855	0.684667	0.00171097	0.235937	544.677	87.8786
527936	3	20200123	2	65	164.9	65.4	24.0512	87.3	0.529412	20200123	8.72	0.741	-2	0.3	3.17	0.752	-0.5	2.3	1261.34	69.0974	1.43121	9.589	0.339382	2.50641	0.783903	0.0227277	0.564883	122.719	2.68558	0.77067	0.0217692	0.549566	123.504	9.38736	0.797163	0.00676079	0.41447	468.648	10.2298	0.780964	0.00647182	0.394979	471.883	37.0394	0.800439	0.00241684	0.289741	1831.4	40.5135
244263		20160513	1	52	177.9	89.9	28.4059	94.2	0.529511	20160513	13.72	0.949	13.93	0.839	-1.2	-0.6	3.86	0.785	-0.5	0.2	1226.47	60.6463	1.37417	8.3087	0.516887	3.06693	0.690538	0.0247612	0.535477	94.6144	3.15871	0.667996	0.0252692	0.537177	92.9557	11.774	0.364454	327.86	13.7257	0.686919	0.00609843	0.366302	325.642	57.5243	0.680613	0.00201336	0.241677	1275.98	54.4041
130096434		20151014	1	54	178.2	94.7	29.8218	94.4	0.529742	20151014	17.63	1.046	8.24	0.685	-2.5	-0.4	3.25	0.712	-0.8	1.1	1111.44	69.4075	0.766375	5.1868	0.792151	2.62784	0.808266	0.0236783	0.569174	30.371	2.32251	0.82972	0.0242839	0.577612	30.29	10.0955	0.358541	368.222	19.1193	0.616657	0.00499072	0.325189	363.997	60.1295	0.705324	0.00186348	0.24409	1435.01	75.916
130036067	3	20130315	2	45	168.9	83.2	29.1651	89.5	0.529899	20130315	6.89	0.579	7.92	0.646	-2.8	-0.9	3.04	0.65	-1.4	0.2	1133.38	69.305	0.909965	5.03114	0.947699	2.37729	0.838628	0.0225788	0.582111	40.3657	2.56528	0.825212	0.022688	0.575832	40.0227	8.94976	0.376602	191.807	14.7023	0.636668	0.00594252	0.360227	191.236	46.2129	0.718829	0.0021551	0.252712	739.819	58.1517
120139275		20140721	1	47	175.4	80.5	26.166	93	0.530217	20140723	13.52	0.942	-0.4	0.1	5.04	0.986	1.1	1.8	1252.31	64.6689	-0.0815718	3.72267	0.467861	3.18064	0.74837	0.0210515	0.535662	117.274	4.03409	0.674682	0.01973	0.514671	116.816	12.2574	0.756913	0.00599304	0.389576	447.23	15.7608	0.681537	0.00550554	0.364404	445.318	48.569	0.759636	0.00201328	0.267769	1747.91	62.7321
140078620		20170410	1	44	176.9	83.7	26.7467	93.8	0.530243	20170410	11.78	0.865	-1	-0.5	3.52	0.658	-1.5	-0.9	1208.41	60.8688	0.0551017	3.16422	0.734565	3.52024	0.705968	0.0202707	0.525758	82.7458	3.56112	0.695363	0.0201509	0.525236	82.3101	13.5762	0.713163	0.00555626	0.370578	312.911	13.8378	0.700306	0.00565048	0.372331	311.041	53.5881	0.715937	0.00183957	0.248097	1215.97	54.4669
130032197		20190322	2	49	162.7	63.6	24.026	86.3	0.530424	20190322	14.68	1.08	1	1.3	4.55	0.939	1.3	1.8	1310.84	74.7018	0.0322012	2.86506	0.519051	3.53324	0.744585	0.0315133	0.560899	167.391	3.23684	0.759675	0.0331833	0.569779	167.322	14.2498	0.750055	0.0138265	0.41538	647.219	12.913	0.767607	0.0150121	0.421488	647.104	56.8992	0.75389	0.00761674	0.296981	2543.76	52.1966
393421	3	20180111	2	57	159.3	57	22.4617	84.5	0.530446	20180111	14.3	0.882	-0.9	-0.3	4.51	0.814	-0.3	0.4	1189.67	61.3909	0.250471	3.46028	0.87293	5.82628	0.514535	0.0171343	0.461299	68.2147	5.10641	0.573333	0.0181492	0.491216	68.4474	22.7731	0.519281	0.00474523	0.322254	257.039	19.8481	0.57936	0.00505835	0.349138	189.594	39.5282	0.761338	0.00213083	0.272737	747.502	64.4208
536515		20181130	1	75	173.8	90.5	29.9605	92.2	0.530495	20181130	10.72	0.726	15.83	0.898	-0.7	-0.2	4.67	0.746	-0.8	0	1204.01	59.9755	0.379869	3.57975	0.781829	4.83527	0.574113	0.0180211	0.476545	78.7681	5.18571	0.53826	0.0177509	0.476203	77.7208	18.8249	0.425905	162.861	13.4908	0.742235	0.00543146	0.376679	158.828	35.6658	0.831812	0.00195478	0.293072	627.153	53.6967
234677	3	20170426	1	45	177.1	80.6	25.6979	94	0.530774	20170426	19.1	1.097	0.9	1.1	5.43	0.955	0.9	1.5	1254.4	81.553	0.858054	4.9586	0.652185	4.27311	0.737227	0.0163183	0.513195	117.054	7.16068	0.55902	0.013055	0.44575	115.349	16.9286	0.742755	0.00525799	0.364576	447.505	28.401	0.568233	0.00416824	0.313218	440.806	67.4419	0.744949	0.00237938	0.25077	1752.17	113.08
120006023	3	43983	1	60	168.4	80.2	28.2807	89.4	0.530879	43983	12.66	0.89	11.89	0.905	-0.5	-0.4	3.06	0.681	-1.1	-0.7	1315.17	213.733	1.90603	7.02996	1.60593	1.10084	0.96413	0.0754583	0.751196	131.913	2.34785	0.921776	0.0632422	0.692613	130.376	4.14678	0.540317	203.351	6.15873	0.94885	0.00971396	0.517402	197.356	16.4078	0.967427	0.00573278	0.409399	792.337	24.4524
130033141		20190311	1	60	178.7	86.8	27.1813	94.9	0.531058	20190311	18.53	1.07	0.7	1	5.07	0.899	0.4	1.4	1179.09	67.9789	0.973312	7.21612	1.01889	4.23529	0.680288	0.0177223	0.50184	62.6982	3.63798	0.727504	0.0185411	0.514819	62.8303	16.4811	0.687742	0.00489012	0.352831	235.679	14.1529	0.733784	0.00508737	0.3679	236.138	65.0454	0.690602	0.00160351	0.236066	911.897	56.049
479621	3	43206	2	58	161.8	62.3	23.7975	85.95	0.531211	43206	13.25	0.97	0	1.2	3.98	0.869	0.6	2.2	1314.75	127.175	0.0275176	2.42807	1.281	1.22672	0.958512	0.107032	0.715004	164.021	1.04167	0.965166	0.1101	0.743278	163.956	4.68071	0.962059	0.0830472	0.595301	640.352	3.96167	0.968227	0.0850759	0.626038	640.19	18.6746	0.962899	0.0723478	0.488317	2531.66	15.7883
529921		20161223	2	74	153.6	58.2	24.6684	81.6	0.53125	20161223	8.24	0.685	-2.5	-0.4	3.25	0.712	-0.8	1.1	1111.44	69.4075	0.766375	5.1868	0.792151	2.62784	0.808266	0.0236783	0.569174	30.371	2.32251	0.82972	0.0242839	0.577612	30.29	10.0955	0.816403	0.00724044	0.416394	111.296	8.75385	0.840173	0.00738273	0.432445	111.129	40.4261	0.817635	0.0028648	0.288168	426.882	34.9117
438527	3	20151023	1	42	178.8	82.4	25.7746	95	0.53132	20151023	14.8	0.934	-0.4	0	4.39	0.89	0.4	0.9	1225.45	49.2054	0.458105	4.49372	0.378164	3.07582	0.582487	0.0293468	0.533733	92.4314	2.9585	0.595071	0.0295653	0.536347	92.3794	12.134	0.588666	0.00780213	0.378863	351.084	11.6996	0.599912	0.00777061	0.381316	350.775	47.7412	0.594674	0.00250587	0.257273	1366.01	46.3939
557320	3	20160426	1	46	178.5	79.7	25.0139	94.9	0.531653	20160426	9.12	0.73	-2.1	-0.6	2.48	0.544	-2.4	-1.1	1257.25	61.9044	0.502417	4.41768	0.342838	3.50905	0.678936	0.021239	0.529599	119.548	4.66364	0.57459	0.0189532	0.493515	118.32	13.5256	0.688804	0.00598768	0.380434	457.375	18.2492	0.581884	0.0054247	0.346874	452.467	53.3733	0.693085	0.00213732	0.258387	1785.97	72.5932
140085422	3	20191108	1	47	178.6	82.6	25.8951	95	0.531915	20191108	14.44	0.958	-0.2	0.2	4.65	0.879	0.3	0.9	1254.16	61.1386	0.396471	3.80978	0.361744	3.56725	0.671781	0.0199856	0.518603	117.029	4.04759	0.624775	0.019603	0.508845	115.783	13.8848	0.681469	0.00554427	0.363783	446.869	15.7603	0.635437	0.00547776	0.362716	441.896	55.0842	0.684308	0.0018905	0.245362	1745.87	62.6968
150069852	3	20170515	2	50	166.9	61.3	22.0063	88.8	0.532055	20170515	12.84	0.864	-1	-0.5	3.56	0.698	-1.2	-0.5	1204.09	70.0704	-0.052319	3.68944	0.822295	5.34338	0.644256	0.0155331	0.477482	79.8581	7.10347	0.524174	0.0140308	0.441349	78.963	20.9404	0.649644	0.00452963	0.332264	302.605	27.9401	0.530323	0.00409099	0.367748	567.686	34.6599	0.769262	0.00266821	0.290637	2233.78	55.0255
180035209	3	20190905	2	53	165.2	63	23.0845	87.9	0.532082	20190905	14.17	0.999	0.1	0.4	4.23	0.759	-0.7	-0.2	1208.75	75.9093	-0.0321889	3.15958	0.80892	5.04286	0.720041	0.0138259	0.486494	85.5532	10.7393	0.404147	0.0104691	0.391904	82.2925	19.9167	0.723782	0.00403502	0.341987	324.902	42.7933	0.407296	0.00322135	0.382662	551.28	33.0468	0.826454	0.00411198	0.321108	2189.15	53.8098
499677	3	43570	1	50	164	69	25.6544	87.28	0.532195	43570	14.68	0.957	-0.2	0.2	4.03	0.756	-0.7	0	1234.6	178.063	1.98054	7.69811	1.56486	1.55209	0.959004	0.0373598	0.681032	94.2916	2.21027	0.942365	0.0338186	0.645914	93.5832	5.99087	0.961531	0.0214707	0.537251	363.992	8.62486	0.945327	0.0198679	0.5049	361.182	23.9114	0.962156	0.0164601	0.410705	1428.7	34.3427
160168581	3	20191230	1	61	173.1	75.4	25.1639	92.2	0.53264	20191230	12.1	0.785	-1.7	-0.7	3.78	0.741	-0.8	0.1	1227.37	56.8022	-0.0652355	3.51635	0.475376	3.65	0.642028	0.0220291	0.507289	95.975	3.4439	0.6567	0.0233565	0.524853	96.0602	14.2282	0.648168	0.00634365	0.362787	364.167	13.2862	0.666129	0.00669311	0.377119	364.541	56.4508	0.65085	0.00218652	0.241993	1417.94	52.8154
150163871	3	43691	1	59	170.3	70.8	24.412	90.72	0.532707	43691	11.5	0.712	-2.3	-1.2	3.58	0.654	-1.6	-0.6	1144.08	146.636	1.6449	5.91127	1.19701	1.76611	0.961042	0.0408496	0.685406	54.7744	1.98	0.955851	0.0395634	0.688355	55.1789	6.87422	0.962915	0.0151797	0.541513	209.198	7.68947	0.958032	0.0141274	0.537805	210.924	27.2952	0.963605	0.00723328	0.408554	817.807	30.4558
130152349	3	20171027	1	33	173	76.9	25.6941	92.2	0.532948	20171027	10.16	0.769	-1.8	-1.5	3.65	0.698	-1.2	-0.9	1198.29	54.3062	0.277815	3.40305	0.767701	4.29739	0.543744	0.022183	0.504569	73.8415	4.10975	0.560956	0.0222753	0.499767	73.6069	16.7868	0.5492	0.0061408	0.363554	278.378	16.0467	0.566058	0.00624949	0.350453	277.39	66.9297	0.549208	0.00217064	0.24424	1080.99	63.6446
150069852		20170515	2	50	155.3	60.4	25.0434	82.8	0.533162	20170515	14.47	1.009	0.4	0.8	4.43	0.909	1	1.7	1290.2	58.8544	0.582023	6.39934	0.232516	2.24324	0.757648	0.0274396	0.57296	148.713	3.49099	0.611977	0.023324	0.519289	148.124	8.68994	0.766976	0.00769576	0.419826	570.267	13.8356	0.618552	0.00657752	0.367748	567.686	34.6599	0.769262	0.00266821	0.290637	2233.78	55.0255
325710	3	20171123	2	51	169.3	85.5	29.8299	90.4	0.533963	20171123	14.6	1.085	11.34	0.782	-1.3	0.1	2.59	0.555	-2.6	-0.8	1157.61	61.9484	1.0625	7.08827	1.03718	2.49801	0.775274	0.0261681	0.573101	50.7453	3.44318	0.685708	0.0229332	0.53558	49.9438	9.56098	0.47053	622.901	9.30321	0.806462	0.00931541	0.433426	622.201	27.6161	0.863146	0.00452427	0.340546	2444.43	36.8953
170075965	3	20180706	2	55	169.8	75.5	26.1861	90.7	0.534158	20180706	10.03	0.81	-1.4	-0.1	3.2	0.671	-1.2	0	1213.26	61.3552	0.553219	4.66809	0.730808	2.65774	0.764486	0.0237198	0.557759	85.6339	3.55364	0.683427	0.0205297	0.527381	84.6077	9.97024	0.774588	0.00686805	0.404211	324.833	13.4441	0.694804	0.00580396	0.381525	320.869	39.4293	0.777435	0.00239269	0.272866	1263.89	53.0668
130152226		20160928	1	58	170.1	83.3	28.7896	91	0.534979	20160928	12.2	0.887	6.38	0.531	-3.6	-1.6	2.74	0.606	-2	-0.1	1134.49	191.943	2.35394	9.49605	1.18481	1.35907	0.970344	0.089608	0.757722	48.9161	2.84926	0.936154	0.0860166	0.714424	47.4448	5.17708	0.309665	241.965	29.2562	0.721569	0.00304298	0.311661	241.998	126.236	0.701215	0.00131377	0.205767	939.832	116.888
485404	3	20180302	2	77	164.6	62.6	23.1055	88.1	0.535237	20180302	14.89	0.906	-0.7	0	3.26	0.607	-1.9	-1	1182.17	55.3071	0.0707921	3.19249	0.915579	3.94766	0.603275	0.0205037	0.498137	63.9532	3.67083	0.62606	0.0217187	0.517325	64.4993	15.3285	0.611753	0.0057449	0.347872	240.3	14.3104	0.632766	0.00609954	0.43372	368.33	22.7756	0.870835	0.00307558	0.337765	1449.22	30.1774
241672	1.3.5	20200327	2	69	165.7	68.6	24.985	88.7	0.535305	20200327	9.77	0.811	-1.4	0.5	3.08	0.573	-2.1	-0.2	1113.13	62.3659	0.722111	5.13943	0.796852	2.17102	0.811485	0.0252776	0.588545	30.1634	2.13132	0.81741	0.0247597	0.588223	30.3291	8.36983	0.819744	0.00698271	0.427409	110.507	8.12527	0.827441	0.00683553	0.433224	111.23	33.1618	0.822322	0.0022629	0.296188	423.008	32.2159
530437	3	20170921	2	69	159.7	58.9	23.0943	85.5	0.535379	20170921	10.35	0.866	-0.9	-0.5	3.01	0.684	-1.1	-0.6	1278.54	60.8431	0.254322	6.46735	0.259122	1.47674	0.843458	0.0363453	0.655937	138.384	2.85315	0.690674	0.026598	0.557098	137.093	5.41337	0.856754	0.0107011	0.497279	530.012	11.0979	0.699427	0.00750105	0.357902	227.986	47.9417	0.764299	0.00198754	0.263622	893.864	64.402
482608	3	20181017	1	57	178.9	82.2	25.6833	95.8	0.535495	20181017	15.45	0.953	-0.3	0.2	3.4	0.661	-1.5	-0.6	1204.59	59.4502	0.400988	4.38762	0.754092	3.70419	0.659646	0.0212617	0.524956	79.3674	4.68581	0.570395	0.0192495	0.484105	78.5168	14.2651	0.668569	0.00575749	0.373525	299.6	18.2012	0.578127	0.00525134	0.340656	296.294	56.3209	0.671127	0.00181028	0.249713	1162.41	72.1078
508393	3	20200730	1	50	179.2	84.7	26.3759	96	0.535714	20200730	16.63	1.012	0.2	0.6	5.11	0.917	0.6	1.3	1197.28	50.34	0.642454	4.89471	0.755981	3.90758	0.492073	0.0254477	0.510741	72.6811	3.34559	0.576354	0.0263737	0.526835	72.8743	14.9106	0.507814	0.00732553	0.366888	273.081	12.8636	0.586881	0.00737805	0.378167	273.878	59.2682	0.509496	0.00243572	0.242873	1057.87	50.9395
180085819	3	20190710	1	61	177.5	83	26.344	95.1	0.535775	20190710	20.34	1.18	1.6	1.6	4.45	0.809	-0.3	0.7	1184.14	102.565	1.31151	6.65568	1.21002	4.17256	0.831684	0.0151143	0.523814	69.6074	3.90009	0.842609	0.0152972	0.532144	69.9631	16.333	0.837502	0.00493629	0.383045	264.228	15.3534	0.847206	0.00508526	0.38662	265.443	65.1349	0.839682	0.00230178	0.271262	1030	61.2773
311080	3	20160922	1	57	174.7	86.3	28.2765	93.6	0.535776	20160922	12.79	1.027	10.67	0.922	-0.4	-0.2	2.57	0.603	-1.9	-1.4	1230.93	56.3764	0.366081	4.81844	0.454232	2.97249	0.686015	0.0269039	0.546072	98.2334	3.12381	0.661943	0.0255093	0.530768	97.9143	11.5626	0.341458	490.232	28.893	0.631201	0.00483302	0.317292	488.861	93.97	0.712906	0.00314306	0.235131	1919.29	115.262
397726		20190605	1	50	174.3	85.1	28.0114	93.4	0.535858	20190605	13.5	0.866	13.62	0.902	-0.7	-0.2	4.04	0.767	-0.6	0.1	1223.49	56.9907	0.318701	3.64132	0.557549	4.16667	0.589517	0.0208234	0.505106	92.0341	3.98826	0.60783	0.0209235	0.503578	92.1108	16.1225	0.372092	261.45	18.6748	0.573671	0.00526192	0.340244	257.718	55.6515	0.679858	0.00196057	0.248656	1014.57	74.1128
140085451	3	20190916	2	63	165.9	78	28.3401	88.9	0.535865	20190916	9.88	0.761	14.44	0.967	0	0.1	3.32	0.751	-0.5	0	1253.99	56.3951	0.096855	4.10587	0.345659	2.11	0.774527	0.0297563	0.591702	117.72	2.792	0.703746	0.026124	0.544594	117.132	8.08761	0.433912	204.949	11.9197	0.730443	0.00635595	0.39451	203.882	31.6845	0.822122	0.00221569	0.301456	791.71	47.1325
140165452		20151228	2	62	161.6	59.6	22.8225	86.6	0.535891	20151228	11.22	0.74	-1.3	-1	3.21	0.668	-1.7	-0.7	1187.57	157.613	2.00016	7.19245	1.38692	1.12607	0.967904	0.0334514	0.714103	68.4024	1.61756	0.954244	0.0329825	0.704928	68.6909	4.13248	0.971144	0.0145636	0.569714	261.946	6.17199	0.957229	0.0138134	0.350831	225.304	44.7088	0.708447	0.00230251	0.269646	878.564	58.8504
381654	3	20170523	2	59	167.7	72.1	25.6371	89.9	0.536076	20170523	9.95	0.773	-1.7	-0.1	2.61	0.534	-2.5	-1	1176.64	65.939	0.294213	3.12209	0.967094	3.56461	0.741551	0.0189167	0.529441	63.1208	4.33252	0.691856	0.0173188	0.507628	62.4711	13.6383	0.750346	0.00531955	0.38099	236.803	16.8936	0.696693	0.00485546	0.361343	234.25	54.1842	0.751767	0.00183712	0.256537	915.582	67.1204
150069849		20190328	1	53	177.4	83.7	26.5961	95.1	0.536077	20190328	16.5	1.028	0.4	0.7	5.42	0.971	1	1.8	1244.1	83.0116	0.169796	3.22903	0.754697	3.93171	0.804512	0.0144297	0.510999	112.042	4.07692	0.789866	0.0148414	0.512505	112.743	15.2512	0.811327	0.00451963	0.369063	428.142	15.9438	0.79541	0.00459031	0.371249	430.643	60.6848	0.812822	0.0019475	0.252038	1673.62	63.9432
130044282	3	20130329	1	45	174.3	83.1	27.3531	93.5	0.536431	20130329	15.03	0.932	-0.4	0	4.9	0.852	0	0.7	1220.41	66.0766	0.205525	3.5704	0.671679	3.89662	0.714032	0.0188429	0.530447	92.1729	5.80247	0.577272	0.015302	0.455644	91.4805	14.9934	0.722308	0.00557727	0.381897	349.354	22.453	0.58685	0.00456075	0.315782	346.73	59.4784	0.72385	0.00213056	0.258245	1358.43	89.3495
150033286		20200625	1	53	175.6	85.2	27.6306	94.2	0.536446	20200625	15.56	0.992	0.1	0.4	4.22	0.767	-0.6	0.2	1256.69	57.3207	0.492295	4.7415	0.249395	2.71272	0.722119	0.0255567	0.555383	119.535	3.4208	0.64988	0.0230991	0.530629	119.263	10.342	0.731813	0.00711223	0.402046	456.225	13.0916	0.661034	0.00648199	0.377201	455.226	40.9384	0.734823	0.00231024	0.270661	1781.84	52.1026
280243	3	20170629	1	54	180.6	90.9	27.8694	96.9	0.536545	20170629	18.98	1.23	2	2	5.88	1.218	3	3.8	1310.68	74.4192	0.523846	4.15823	0.478634	4.01452	0.669047	0.0240784	0.530887	165.003	3.57206	0.700178	0.0260366	0.55058	165.544	16.0069	0.679605	0.00924093	0.381314	637.158	14.2737	0.708832	0.00982696	0.405173	639.161	64.5088	0.682484	0.0058261	0.269673	2503.61	57.2813
140085422		20191108	1	47	172.9	93.4	31.2433	92.8	0.536726	20191108	14.44	0.958	-0.2	0.2	4.65	0.879	0.3	0.9	1254.16	61.1386	0.396471	3.80978	0.361744	3.56725	0.671781	0.0199856	0.518603	117.029	4.04759	0.624775	0.019603	0.508845	115.783	13.8848	0.681469	0.00554427	0.363783	446.869	15.7603	0.635437	0.00547776	0.362716	441.896	55.0842	0.684308	0.0018905	0.245362	1745.87	62.6968
398654		20150506	1	41	169.9	89.1	30.8668	91.2	0.536786	20150506	17.62	0.986	7.83	0.687	-2.4	-2.2	2.71	0.65	-1.4	-1.1	1290.6	64.6095	0.192074	3.65171	0.363636	1.91463	0.830834	0.0273325	0.604076	150.413	2.00748	0.820581	0.0266824	0.606595	150.146	7.24187	0.342257	367.414	15.5457	0.643918	0.00574813	0.366077	368.7	72.2639	0.587584	0.00170556	0.228342	1432.07	61.9989
150082648	3	20190318	2	49	165.8	63.4	23.0632	89	0.536791	20190318	8.62	0.679	-2.5	-0.5	2.84	0.567	-2.2	-0.5	1137.17	48.4569	0.30054	3.228	0.90139	2.03517	0.731341	0.0352063	0.608781	38.9009	1.81238	0.762734	0.0355741	0.611627	38.8111	7.64322	0.7435	0.00958589	0.452607	143.577	6.67698	0.777466	0.00953317	0.388239	193.151	34.6723	0.761009	0.00237897	0.289307	757.706	43.1548
130029485	3	20130304	1	47	165.4	65.6	23.9791	88.8	0.53688	20130304	16.32	1.006	0.2	0.5	5.34	0.926	0.6	1.3	1276.21	74.4643	0.219602	2.69045	0.498176	4.15929	0.736042	0.018548	0.527177	137.449	4.25179	0.721569	0.0183632	0.521685	137.269	16.5479	0.742244	0.00631429	0.385589	528.291	16.8867	0.728419	0.00604662	0.374473	527.621	66.0707	0.744666	0.00276939	0.267876	2069.31	67.3307
120161476		20181224	1	54	176.2	92.7	29.8585	94.6	0.53689	20181224	14.86	0.882	10.75	0.722	-2.2	-0.8	3.23	0.638	-1.7	-0.4	1142.61	55.4716	0.0457229	3.09852	0.971638	3.13103	0.678456	0.0233287	0.536748	42.1288	4.10645	0.573664	0.0209606	0.504009	41.674	12.1782	0.361419	97.9673	14.5502	0.664617	0.00617744	0.364837	97.9118	63.242	0.637574	0.00214307	0.240445	372.465	58.2233
495491	3	42863	1	48	172.9	81.7	27.3295	92.86	0.537073	42863	9.23	0.721	-2.2	-1.4	3.86	0.7	-1.2	-0.5	1200.72	178.58	2.00182	6.86409	1.47082	1.36101	0.965339	0.0361022	0.699779	74.3772	2.75857	0.926591	0.0288776	0.643852	71.3886	5.0563	0.968585	0.0183876	0.56482	286.495	10.7193	0.930291	0.0132276	0.502925	274.386	20.2175	0.969022	0.0132718	0.436046	1124.62	43.4329
304939	3	20191111	1	59	178	84.4	26.6381	95.6	0.537079	20191111	9.67	0.702	-2.4	-1.3	3.49	0.641	-1.7	-0.7	1147.6	67.8517	0.506368	4.1402	1.0055	3.38238	0.76097	0.0185491	0.531956	46.7321	4.26595	0.697429	0.016937	0.504169	46.0063	13.0165	0.769068	0.00507911	0.38856	173.589	16.5966	0.704691	0.00471153	0.355839	170.695	51.8305	0.771184	0.0016385	0.261224	668.449	66.1357
150071468	3	43609	2	56	159.1	65.4	25.8367	85.45	0.537084	43609	11.16	0.739	-2	-0.5	2.84	0.569	-2.2	-0.9	1190.66	125.197	1.26624	4.96388	1.33126	1.07837	0.969043	0.0286558	0.712842	76.9436	2.02615	0.940008	0.02446	0.668463	74.743	4.01317	0.971665	0.0121952	0.566754	294.531	7.91773	0.942149	0.00974529	0.530488	285.754	15.7461	0.972537	0.0078706	0.428545	1152.48	31.7966
529921	3	20161223	2	74	163.1	58.6	22.0287	87.6	0.537094	20161223	10.24	0.787	-1.7	-0.8	4.34	807	-0.3	0.6	1225.71	67.7269	0.594093	4.18459	0.691601	3.62745	0.732391	0.0189322	0.519564	95.3258	3.70606	0.725517	0.0188143	0.524845	95.3818	13.9827	0.741827	0.0053871	0.368344	362.37	14.4417	0.732318	0.00541437	0.432445	111.129	40.4261	0.817635	0.0028648	0.288168	426.882	34.9117
170137528	3	20190403	2	60	162.5	62	23.4793	87.3	0.537231	20190403	11.58	0.941	-0.2	0	3.65	0.757	-0.4	0	1241.38	170.299	2.71697	11.0065	1.40417	1.37244	0.94206	0.0357681	0.663748	91.8044	2.56159	0.888327	0.0299734	0.621053	89.1313	5.27022	0.946115	0.0159723	0.516801	352.696	10.058	0.89367	0.0121856	0.379179	185.847	37.8281	0.787257	0.0022769	0.288479	729.103	53.6403
433918		20191126	2	49	166.4	66.8	24.1251	89.4	0.53726	20191126	11.57	0.899	-0.6	0	3.06	0.661	-1.3	-0.7	1270.83	45.5496	0.734958	4.69232	0.108832	1.17451	0.805575	0.0482276	0.665131	130.396	2.00988	0.654054	0.0387029	0.589679	129.064	4.3183	0.821991	0.0135469	0.5038	499.52	7.78063	0.66555	0.0106365	0.433699	494.017	17.0601	0.824716	0.00400444	0.357154	1954.73	30.7655
150163884		20171115	2	58	164.7	57.2	21.0867	88.5	0.537341	20171115	12.08	0.927	-0.4	1	3.3	0.71	-0.9	0.7	1221.43	56.3531	0.328619	4.34997	0.539873	2.74028	0.719356	0.0253436	0.553485	91.793	2.87302	0.701963	0.0244193	0.536823	90.8776	10.4878	0.727856	0.00707647	0.404605	347.174	11.0026	0.710629	0.00696632	0.387612	343.506	41.1444	0.733106	0.00232348	0.275772	1351.92	43.7679
534421		20181204	1	56	171.8	88.2	29.8829	92.4	0.537835	20181204	15.43	1.005	9.48	0.803	-1.4	0.2	2.71	0.547	-2.4	-0.8	1172.39	66.6081	0.374956	3.18232	0.989027	3.17656	0.773859	0.019011	0.52328	60.8017	4.30213	0.69708	0.0162953	0.499412	59.9851	12.3834	0.389448	295.939	15.64	0.687205	0.00501714	0.351038	292.837	49.1154	0.757676	0.00188094	0.262264	1149.85	61.8787
454005	3	20181107	2	52	161	58	22.3757	86.6	0.537888	20181107	6.35	0.571	-3.2	-0.8	2.07	0.432	-4	-0.9	1172.67	184.849	1.40147	4.66526	1.37495	1.93492	0.9662	0.0535534	0.7053	71.7841	3.34411	0.940853	0.0503869	0.685262	71.0954	7.59577	0.9679	0.0321805	0.581027	277.71	13.4205	0.942579	0.0296795	0.410737	256.873	26.6059	0.791665	0.00278555	0.314805	999.141	36.0701
547337		20150526	1	49	168.2	96.4	34.0742	90.5	0.53805	20150526	15.06	0.929	-0.5	0.2	4.2	0.729	-0.9	0.2	1277.66	60.8549	-0.0391183	3.27062	0.262112	3.86652	0.654596	0.018733	0.502935	137.437	4.03779	0.634091	0.0184939	0.505974	137.845	15.0837	0.663643	0.00547633	0.355528	526.501	15.9273	0.63998	0.00534495	0.353506	528.084	60.0938	0.665972	0.00193025	0.238719	2060.62	63.4738
385377		20151204	2	54	166.7	66.1	23.7865	89.7	0.538092	20151204	9.45	0.742	-2	-0.7	3.08	0.65	-1.4	-0.4	1178.42	56.9215	0.169864	3.15449	0.945019	2.07213	0.804103	0.0255687	0.5831	62.9377	2.58385	0.753235	0.0236453	0.556918	62.8531	7.76077	0.81305	0.00708717	0.428749	235.561	9.84115	0.760495	0.00653863	0.406042	235.15	30.2138	0.817181	0.00218322	0.296197	911.81	38.7479
325707		20190610	1	60	171.1	86	29.3764	92.1	0.538282	20190610	13.22	0.833	10.07	0.799	-1.5	0	2.75	0.558	-2.3	-0.9	1173.11	59.4554	0.339712	2.92359	0.980631	2.60355	0.768735	0.0232243	0.563722	59.9737	3.60207	0.681045	0.0201536	0.520168	59.0012	9.7357	0.392344	257.759	11.4169	0.711286	0.00705205	0.390136	253.629	44.633	0.726011	0.00217002	0.262775	998.46	45.2494
368763	3	20181018	1	72	173.7	81.5	27.0121	93.5	0.538284	20181018	10.75	0.722	-2.2	-0.8	3.23	0.638	-1.7	-0.4	1142.61	55.4716	0.0457229	3.09852	0.971638	3.13103	0.678456	0.0233287	0.536748	42.1288	4.10645	0.573664	0.0209606	0.504009	41.674	12.1782	0.684026	0.00639379	0.384747	155.99	16.1688	0.576491	0.00573081	0.352962	154.166	48.5751	0.68465	0.00202226	0.255678	599.836	64.2901
417402	3	43801	1	45	166.9	74.5	26.7451	89.85	0.538346	43801	14.35	0.923	-0.5	-0.1	3.8	0.728	-1	-0.3	1177.59	140.18	1.65725	5.66573	1.27782	1.30967	0.964986	0.0316923	0.677057	68.1231	2.47527	0.932266	0.0301283	0.651455	66.454	4.85125	0.968279	0.0126655	0.529344	261.348	9.87775	0.933782	0.0105041	0.498849	254.352	19.2082	0.968957	0.00752706	0.396589	1023.77	39.9574
381654	3	20180511	2	60	167.7	72.1	25.6371	90.3	0.538462	20180511	9.48	0.803	-1.4	0.2	2.71	0.547	-2.4	-0.8	1172.39	66.6081	0.374956	3.18232	0.989027	3.17656	0.773859	0.019011	0.52328	60.8017	4.30213	0.69708	0.0162953	0.499412	59.9851	12.3834	0.779254	0.00527018	0.378055	227.892	16.9282	0.701593	0.00460446	0.35563	224.622	48.8362	0.780915	0.00175316	0.253704	881.057	67.0718
130156455	3	20161123	2	51	159.3	60.9	23.9986	85.8	0.538606	20161123	14.42	1.109	1.2	1.6	4.14	0.817	0.1	0.9	1256.54	66.421	0.693431	4.12031	0.390082	2.72137	0.780985	0.0226503	0.561418	119.633	3.74052	0.685952	0.020269	0.52675	118.29	10.3932	0.791172	0.00681715	0.420199	457.957	14.3586	0.698704	0.0061192	0.379228	452.518	41.0017	0.794825	0.00275111	0.293723	1791.72	57.2172
170034702	3	43564	2	61	155.2	55.3	22.9584	83.63	0.538853	43564	17.06	1.138	1.3	1.4	5.22	0.99	1.2	1.8	1269.53	75.6132	0.353218	3.38461	0.53912	3.82569	0.747792	0.017907	0.53015	131.396	5.40767	0.642632	0.0149954	0.474592	130.645	15.0271	0.755257	0.00570216	0.384175	503.681	21.6125	0.646965	0.0047615	0.519762	401.307	12.9471	0.969602	0.00970104	0.427953	1618.18	24.3256
130044237		20190327	1	55	177.9	86.9	27.4579	95.9	0.539067	20190327	11.3	0.745	-2	-1.1	4.54	0.951	0.8	1.7	1182.62	60.5362	0.0298632	3.14389	0.91763	5.19872	0.553668	0.0176419	0.467439	64.4345	5.91929	0.490882	0.0170255	0.450356	63.6543	20.7543	0.554743	0.00498068	0.320363	241.8	23.27	0.499023	0.00479388	0.311746	238.779	82.6396	0.556619	0.00172178	0.209336	936.163	92.57
440674		20181217	2	53	165.1	66.4	24.3598	89	0.539067	20181217	8.44	0.688	-2.4	-1.1	2.66	0.65	-1.4	-0.4	1154.68	48.3181	0.573256	4.10615	0.993493	1.33806	0.825249	0.0410477	0.636801	48.2518	2.09702	0.716197	0.0352516	0.585387	47.2583	4.89303	0.837718	0.0113683	0.478938	179.23	7.87143	0.729393	0.00964427	0.428153	175.3	19.0721	0.840946	0.0033938	0.334878	691.467	30.85
420816		20171207	2	79	167.3	76.5	27.3319	90.2	0.539151	20171130	5.27	0.543	-3.5	-1	1.94	0.366	-4.7	-1.6	1070.95	45.8935	1.3338	9.13798	0.238712	1.68682	0.724591	0.0481875	0.643477	13.647	1.41012	0.767581	0.0504048	0.653768	13.5816	6.41964	0.738866	0.0134252	0.488164	47.801	5.18182	0.787523	0.0140994	0.49631	47.6581	25.4264	0.742925	0.00418591	0.350169	178.834	20.3786
304939		20191111	1	59	169.7	81.9	28.4394	91.5	0.539187	20191111	9.67	0.702	16.27	0.877	-0.9	-0.2	4.15	0.764	-0.7	0.3	1169.84	52.1447	0.195053	3.43654	0.97708	2.46617	0.720697	0.027717	0.565144	56.4825	4.09881	0.531212	0.0227697	0.50178	55.4442	9.21284	0.38856	173.589	16.5966	0.704691	0.00471153	0.355839	170.695	51.8305	0.771184	0.0016385	0.261224	668.449	66.1357
495491	3	42485	1	47	172.9	81.7	27.3295	93.25	0.539329	42485	9.94	0.763	-1.9	-1.1	3.87	0.708	-1.1	-0.4	1245.54	182.047	1.26615	4.6417	1.6325	1.51197	0.967184	0.0482084	0.699307	105.683	2.95291	0.93534	0.0425111	0.671155	104.495	5.87149	0.969123	0.0328309	0.569506	409.884	11.8767	0.936951	0.0284264	0.541426	405.059	23.7175	0.96931	0.028204	0.448524	1614.03	48.0926
482608	3	20171011	1	56	178.9	82.2	25.6833	96.5	0.539407	20171011	16.25	0.948	-0.3	0.2	3.41	0.683	-1.3	-0.4	1206.72	55.3813	0.412512	4.68183	0.682288	3.24545	0.64984	0.025627	0.536497	79.6948	3.16551	0.654135	0.0259833	0.543187	79.7439	12.6286	0.659028	0.00683233	0.38251	301.644	12.3898	0.66106	0.0069694	0.390695	301.73	50.1203	0.662757	0.00208242	0.255878	1171.55	49.4834
300598	3	20160616	2	55	152	56	24.2382	82.1	0.540132	20160616	10.31	0.788	-1.6	-0.2	3.03	0.614	-1.8	-0.5	1137.9	52.1475	0.495886	4.89131	0.927865	2.4538	0.710042	0.0291174	0.572271	39.4321	2.87179	0.663695	0.0268405	0.540009	39.1877	9.35652	0.721603	0.00785799	0.412863	145.274	11.1042	0.67209	0.00732197	0.389579	144.211	36.8457	0.724577	0.00236236	0.281708	558.282	43.7354
462765	3	20160310	2	61	165.5	67.9	24.7898	89.4	0.540181	20160310	9.36	0.695	-2.4	-0.5	3.05	0.552	-2.3	-0.7	1136.72	50.9039	0.846802	8.50683	0.925873	1.97423	0.74101	0.0343545	0.5943	38.6788	2.62816	0.657815	0.0295338	0.549164	38.6768	7.44249	0.75369	0.00942171	0.441601	142.609	10.0644	0.669332	0.00811381	0.399347	142.575	29.1873	0.75707	0.00285903	0.305133	546.82	39.5429
130168663	3	20160617	1	59	174.2	81.3	26.7913	94.1	0.540184	20160617	10.21	0.758	-1.9	-1	3.07	0.676	-1.4	-0.5	1147.79	64.69	0.220159	3.13848	0.983604	4.41527	0.668879	0.0172647	0.496259	45.9251	3.82805	0.708422	0.0185239	0.510655	45.8957	17.1947	0.676615	0.00486273	0.353616	170.806	14.8668	0.716032	0.00517839	0.360229	170.702	68.4797	0.677497	0.00174874	0.235256	657.965	59.1395
130122654	3	20161110	1	51	171.4	82.3	28.0142	92.6	0.540257	20161110	15.83	0.898	12.2	0.768	-1.8	-1.6	3.31	0.624	-1.8	-1.6	1207.43	50.3418	0.344101	4.16164	0.593728	2.54667	0.685726	0.0319105	0.580354	80.4333	3.11918	0.605785	0.0285895	0.542878	79.7317	9.78722	0.33207	297.67	20.0961	0.54532	0.00503626	0.331211	293.547	75.0801	0.579174	0.00187288	0.219668	1154.44	79.9221
495491	3	20170508	1	48	170.8	76.4	26.1889	92.3	0.540398	20170508	9.23	0.721	-2.2	-1.4	3.86	0.7	-1.2	-0.5	1170.64	74.0586	0.457698	3.64997	1.03036	6.78468	0.593866	0.0125429	0.445228	58.8323	7.75772	0.535727	0.0120431	0.435504	58.4439	26.6403	0.599237	0.00374089	0.306004	220.472	30.8911	0.535352	0.00356005	0.300628	218.694	106.905	0.598583	0.00154527	0.199515	851.431	123.148
438527		20200720	1	47	170.6	84.1	28.896	92.2	0.540445	20200720	15.17	0.935	15.14	1.11	1.2	1.4	3.38	0.729	-0.7	-0.2	1226.91	59.6549	0.483227	4.07939	0.56357	2.59219	0.758823	0.0234022	0.549137	95.9729	2.955	0.725784	0.0225309	0.535119	95.7551	9.89531	0.411757	387.526	15.4332	0.511719	0.0073125	0.363745	383.609	41.8591	0.671076	0.00253615	0.274228	1509.23	61.4877
170077578		20191104	2	56	158	63	25.2363	85.4	0.540506	20191104	11.33	0.869	-0.9	0.4	3.4	0.758	-0.4	1	1249.36	77.2208	1.39108	7.51033	0.577769	2.50285	0.813924	0.0240887	0.583467	111.823	3.81294	0.707065	0.0202586	0.52494	110.904	9.53561	0.823541	0.00714787	0.431544	427.444	14.8257	0.715719	0.00600859	0.378057	423.713	37.8312	0.825659	0.00279523	0.306925	1669.01	59.0043
483388	3	20190318	2	48	165.4	64.5	23.577	89.4	0.540508	20190318	10.04	0.771	-1.8	-0.9	2.57	0.559	-2.3	-1.4	1219.23	55.9182	0.339781	3.31636	0.562364	2.32979	0.768491	0.02606	0.574763	89.9563	2.64077	0.735688	0.0255382	0.563537	89.58	8.7514	0.779174	0.00711331	0.420139	341.125	9.99493	0.745994	0.00684172	0.398926	557.551	58.4315	0.73497	0.00435087	0.280042	2194.08	52.5078
480711	3	20180807	1	49	173.7	89.2	29.5641	93.9	0.540587	20180807	15.21	0.895	14.8	0.934	-0.4	0	4.39	0.89	0.4	0.9	1225.45	49.2054	0.458105	4.49372	0.378164	3.07582	0.582487	0.0293468	0.533733	92.4314	2.9585	0.595071	0.0295653	0.536347	92.3794	12.134	0.3242	290.033	37.3147	0.478495	0.00321274	0.282155	281.898	94.2285	0.673731	0.00139322	0.217456	1128.45	149.538
140162060		20151204	2	38	165.5	58.3	21.2849	89.5	0.540785	20151204	12.76	1.003	0.3	0.4	3.16	0.743	-0.6	-0.2	1306.01	71.4431	0.429431	5.52222	0.438263	2.50542	0.788288	0.0286666	0.585806	162.717	3.33036	0.71113	0.0245851	0.551705	161.389	9.74384	0.799301	0.0110646	0.435833	627.376	13.2907	0.719604	0.00911754	0.406374	621.845	38.8906	0.800806	0.00480575	0.301986	2462.59	52.9405
150065115	3	43601	2	39	162.5	58.7	22.2296	87.91	0.540985	43601	10.67	0.768	-1.7	-0.6	2.84	0.579	-2.1	-1.2	1288.54	67.8415	0.325822	3.95106	0.42199	3.04153	0.745003	0.0228667	0.568389	146.928	3.33862	0.712539	0.0208779	0.526165	146.169	11.8444	0.755284	0.00767266	0.41901	565.381	13.1759	0.719978	0.00685171	0.472792	208.161	31.2131	0.940597	0.00435708	0.34722	823.4	44.0745
535347	3	43308	1	87	152.3	49.2	21.2112	82.4	0.541037	43308	12.39	0.931	-0.4	0.6	2.94	0.572	-2.2		1181.37	196.768	1.70988	5.55726	1.42638	1.58955	0.967496	0.047855	0.728402	67.9932	2.45513	0.950117	0.043208	0.697701	68.255	6.26682	0.969107	0.0279884	0.599118	263.334	9.89744	0.95151	0.0252008	0.565538	264.235	24.9377	0.969778	0.0207174	0.474736	1035.82	39.7143
130158068		20181016	1	52	176.8	96.6	30.9039	95.7	0.54129	20181016	11.7	0.829	12.37	0.863	-1	-0.5	4.32	0.825	-0.2	0.5	1272.69	137.007	1.48228	5.25875	1.22281	1.02302	0.959035	0.0464201	0.723653	121.711	2.00967	0.918339	0.0429518	0.690945	121.624	3.75448	0.34065	390.114	21.1138	0.56455	0.00465176	0.33457	385.671	69.5842	0.64806	0.00168353	0.226265	1519.54	83.7007
411833	3	20200213	2	62	162	76.4	29.1114	87.7	0.541358	20200213	7.92	0.719	8.83	0.701	-2.3	-0.3	2.47	0.558	-2.3	-0.5	1156.2	44.1282	0.478552	4.31732	0.997638	2.50819	0.601309	0.0352156	0.552222	47.5801	2.39542	0.609375	0.0370829	0.573744	47.1686	9.62456	0.377499	272.23	12.4201	0.770809	0.00533662	0.38572	273.043	57.4688	0.734428	0.00188354	0.258669	1056.6	49.3147
503884	3	20170803	2	44	164.2	60.3	22.3651	88.9	0.541413	20170803	13.4	0.914	-0.6	-0.1	3.49	0.696	-1.2	-0.4	1142.65	126.044	2.71664	13.4396	1.18418	0.949301	0.963809	0.0339001	0.725821	46.461	1.93396	0.922212	0.0307389	0.688933	44.5118	3.38869	0.968237	0.0107707	0.567483	175.229	7.47642	0.925997	0.00936513	0.388046	474.969	31.2733	0.795053	0.00270485	0.3051	1875.38	50.0495
440674	3	20160830	2	51	164.7	75	27.6487	89.2	0.541591	20160830	8.3	0.702	-2.3	-1.3	2.78	0.649	-1.4	-0.7	1174.52	50.854	0.646241	4.38163	0.961865	1.6191	0.806155	0.0364942	0.617445	59.713	1.94271	0.764842	0.0346495	0.601425	59.275	5.84328	0.821529	0.0101308	0.456873	223.19	7.26615	0.77591	0.00957682	0.442213	221.414	22.767	0.825599	0.00297711	0.317157	863.889	28.4568
130096450	3	20151001	1	39	171.9	77.9	26.3624	93.1	0.541594	20151001	14.31	0.879	-0.9	-0.5	3.23	0.673	-1.4	-0.9	1250.15	61.23	0.275279	3.64366	0.371922	4.42176	0.609543	0.0182757	0.493088	114.023	4.49644	0.594937	0.0183546	0.486455	113.015	17.4104	0.614688	0.00518708	0.345829	434.852	17.3421	0.609257	0.00515065	0.339187	431.018	69.7034	0.615293	0.00188584	0.225369	1697.11	69.3201
140148835	3	20170821	1	50	171.9	81.1	27.4454	93.1	0.541594	20170821	10.79	0.773	-1.8	-1	3.84	0.803	-0.3	0.4	1225.99	51.4387	0.400733	3.4685	0.389759	2.86116	0.663459	0.0269466	0.540533	94.3208	3.64536	0.558526	0.0252707	0.516767	92.4192	10.9944	0.669386	0.00750821	0.385262	357.261	13.9856	0.56761	0.00702257	0.364834	349.935	43.3421	0.671601	0.00240418	0.260528	1391.72	55.3446
495796	3	20170619	2	56	165.4	66.2	24.1984	89.6	0.541717	20170619	10.71	0.857	-1	0.3	3.11	0.613	-1.8	-0.5	1218.92	62.4024	0.299002	3.35341	0.620274	2.96037	0.756595	0.0221374	0.539715	90.4306	3.89171	0.673717	0.0197392	0.50568	89.745	11.5427	0.763054	0.00622653	0.39156	343.982	15.3871	0.678289	0.00548017	0.361693	341.165	45.6799	0.766017	0.00213089	0.262793	1338.15	61.5568
381654		20190619	2	61	166.6	72.5	26.1209	90.3	0.542017	20190619	10.6	0.822	-1.3	0.4	2.42	0.518	-2.7	-1.1	1174.6	65.0976	0.47055	3.95586	0.993558	3.28295	0.751897	0.0198364	0.531158	61.4942	4.48377	0.663304	0.017341	0.492297	60.2903	12.5872	0.759558	0.0055836	0.385744	230.958	17.5058	0.668104	0.00490302	0.346919	226.18	49.9955	0.760666	0.00188791	0.255698	893.969	69.8
150157447		20191106	1	46	179.8	86.6	26.7879	97.5	0.542269	20191106	17.1	1.15	1.4	1.5	4.66	0.835	-0.1	0.6	1268.83	73.3863	0.912244	6.48224	0.453964	3.15269	0.760819	0.0207629	0.546016	129.298	4.65957	0.636041	0.0180644	0.510863	128.54	12.2774	0.770012	0.00645658	0.398251	494.829	18.4478	0.644452	0.00540782	0.367444	491.666	48.793	0.772437	0.00253012	0.277647	1936.83	73.2922
170176314		20190313	1	62	180.9	94.2	28.7855	98.1	0.542289	20190313	15.21	0.904	16.5	1.028	0.4	0.7	5.42	0.971	1	1.8	1244.1	83.0116	0.169796	3.22903	0.754697	3.93171	0.804512	0.0144297	0.510999	112.042	4.07692	0.789866	0.0148414	0.512505	112.743	15.2512	0.398451	273.459	13.3626	0.704132	0.00587369	0.368665	270.744	41.3358	0.773329	0.00200774	0.269198	1061.02	52.8503
495491	3	43629	1	50	172.9	81.7	27.3295	93.78	0.542394	43629	9.79	0.731	-2.1	-1.3	3.82	0.708	-1.1	-0.4	1232.16	194.755	1.36807	4.2497	1.64452	1.34705	0.972442	0.0529237	0.730409	92.337	3.93594	0.918536	0.0422753	0.651521	90.4819	5.04783	0.974953	0.0360337	0.601384	358.862	15.8288	0.920448	0.0283543	0.519933	351.285	20.1229	0.97542	0.0310443	0.476739	1414.42	63.9297
538426	3	20171023	2	57	161.3	64.7	24.8677	87.5	0.542467	20171023	7.88	0.691	-2.4	-0.9	3.14	0.719	-0.8	0.5	1183.2	54.5408	0.144906	2.94559	0.898772	2.1526	0.77497	0.0271117	0.571385	65.0656	2.48301	0.738845	0.0256534	0.563906	64.9817	8.00909	0.787122	0.0075974	0.416008	244.609	9.29085	0.75158	0.00710752	0.411133	244.208	31.8539	0.788745	0.00236802	0.278558	945.764	36.6124
170077578	3	20191104	2	56	165.7	68.2	24.8393	89.9	0.542547	20191104	11.33	0.869	-0.9	0.4	3.4	0.758	-0.4	1	1249.36	77.2208	1.39108	7.51033	0.577769	2.50285	0.813924	0.0240887	0.583467	111.823	3.81294	0.707065	0.0202586	0.52494	110.904	9.53561	0.823541	0.00714787	0.431544	427.444	14.8257	0.715719	0.00600859	0.378057	423.713	37.8312	0.825659	0.00279523	0.306925	1669.01	59.0043
130162274		20161028	1	35	172.5	97.9	32.9007	93.6	0.542609	20161028	11.56	0.803	-1.5	-1.2	4.43	0.827	-0.2	0.2	1216.83	60.5859	0.325301	4.07719	0.629095	3.52039	0.688364	0.0219096	0.526475	88.5092	4.72715	0.585476	0.0193517	0.490147	87.3938	13.5789	0.696887	0.00608293	0.379542	334.958	18.3103	0.595373	0.00547885	0.351982	330.61	54.1164	0.69917	0.00207497	0.251073	1303.88	73.0243
499677		20190415	1	50	170.1	81.7	28.2367	92.3	0.542622	20190415	14.68	0.957	12.61	0.834	-1.3	-0.6	3.97	0.785	-0.5	0.3	1221.06	56.4371	0.32825	4.00939	0.559404	2.6119	0.736721	0.0249058	0.557188	90.9726	4.04413	0.585507	0.021133	0.498498	89.7543	9.91131	0.36981	344.823	17.6671	0.563116	0.00576135	0.34653	340.112	54.012	0.673438	0.00205781	0.249758	1344.33	70.6237
503884	3	20160729	2	43	164.2	60.3	22.3651	89.1	0.542631	20160729	12.34	0.852	-1.1	-0.4	3.49	0.693	-1.2	-0.3	1185.92	61.4433	0.952109	4.40404	0.969691	2.49386	0.788074	0.0263029	0.559527	67.5028	3.17636	0.721097	0.0256354	0.546393	66.1064	9.51749	0.79587	0.00717595	0.407415	254.823	12.305	0.727265	0.00691291	0.403531	447.131	36.9301	0.7535	0.00253592	0.30311	1763	44.8359
557317	3	20170328	1	38	176.9	82.7	26.4271	96	0.542679	20170328	11.02	0.811	-1.5	-0.5	3.23	0.645	-1.6	-0.6	1213.14	58.9637	0.221055	3.2672	0.659615	4.6449	0.582153	0.0190393	0.48545	85.0701	4.158	0.623645	0.0205002	0.509397	84.4631	18.332	0.583775	0.00539312	0.344578	321.322	16.13	0.632082	0.00564319	0.362292	319.075	73.0721	0.583591	0.00182702	0.230633	1248.55	64.2079
150065212		20150519	2	49	165.4	62.9	22.9922	89.8	0.542926	20150519	14.86	0.882	-0.9	-0.3	3.71	0.673	-1.4	-0.5	1108.08	61.6224	1.06063	7.78327	0.70287	3.97433	0.629341	0.0211497	0.508624	27.0315	3.69498	0.655424	0.0218045	0.513648	26.9903	15.8049	0.635603	0.00597768	0.361419	97.9673	14.5502	0.664617	0.00617744	0.416156	585.827	36.3638	0.776201	0.0039815	0.312419	2309.3	44.7952
381654	3	20190619	2	61	167.6	73.2	26.0593	91	0.542959	20190619	10.6	0.822	-1.3	0.4	2.42	0.518	-2.7	-1.1	1174.6	65.0976	0.47055	3.95586	0.993558	3.28295	0.751897	0.0198364	0.531158	61.4942	4.48377	0.663304	0.017341	0.492297	60.2903	12.5872	0.759558	0.0055836	0.385744	230.958	17.5058	0.668104	0.00490302	0.346919	226.18	49.9955	0.760666	0.00188791	0.255698	893.969	69.8
150163965		20151218	2	43	161.5	63.2	24.231	87.7	0.543034	20151218	14.26	0.997	0.3	0.4	3.88	0.808	0	0.5	1267.22	50.2934	0.284878	4.45908	0.186404	2.02569	0.733769	0.0336171	0.590466	128.137	2.44563	0.670603	0.0314762	0.567081	127.117	7.64662	0.746108	0.00919592	0.430402	489.57	9.36204	0.680825	0.00862844	0.406079	485.456	30.1096	0.750104	0.00280306	0.29841	1913.43	36.9749
536655	3	44004	2	74	155.5	58.6	24.2347	84.45	0.543087	43979	9.33	0.724	-1.9	0.1	2.37	0.54	-2.8	-0.2	1167.83	145.177	1.39979	4.89465	1.29928	1.43775	0.967238	0.0337368	0.705523	67.9944	4.17236	0.904443	0.0269443	0.632667	66.59	5.51923	0.9694	0.0151617	0.559049	260.332	16.819	0.906182	0.0114	0.496561	254.5	21.9529	0.969933	0.00912263	0.428101	1019.61	67.8159
120167483		20150806	2	65	163.5	62.1	23.2304	88.8	0.543119	20150806	16.25	0.933	-0.4	0	4.56	0.848	0	0.6	1214.54	59.1863	0.637231	5.50112	0.647433	3.0553	0.703698	0.0241259	0.546994	85.8391	5.07945	0.498293	0.0200365	0.479565	84.7788	11.6883	0.71514	0.00658802	0.395062	325.641	19.8421	0.506887	0.0054618	0.327368	208.819	57.6845	0.743638	0.00169467	0.24588	823.189	84.3936
495491	3	43244	1	49	172.9	81.7	27.3295	93.92	0.543204	43244	9.95	0.749	-2	-1.2	3.92	0.744	-0.8	-0.1	1199.83	162.1	1.6573	5.75798	1.4609	1.20029	0.970994	0.0364599	0.706335	77.7361	3.02624	0.926492	0.0288859	0.631532	75.2204	4.35234	0.97445	0.0194055	0.569888	299.781	11.8733	0.929753	0.0146463	0.498514	289.512	17.1645	0.975153	0.014435	0.438835	1176.87	47.9138
130182636		20181210	1	58	169.7	81.5	28.3005	92.2	0.543312	20181210	14.99	1.005	15.17	0.935	-0.4	0	4.78	0.87	0.2	0.9	1236.52	50.3638	0.119363	3.71446	0.332691	2.71164	0.656844	0.0295528	0.5639	101.843	3.93555	0.499688	0.0265988	0.512663	100.858	10.5079	0.353758	288.499	19.8486	0.641025	0.00487431	0.339963	288.814	67.5043	0.694661	0.0017854	0.23681	1118.9	78.5385
140171970	3	20181119	1	72	170.6	84.6	29.0678	92.7	0.543376	20181119	12.12	0.814	9.05	0.752	-1.9	-1.3	3.64	0.685	-1.3	-0.7	1180.93	71.3324	0.225318	3.41094	0.977764	6.64556	0.586754	0.0133013	0.452781	64.7969	7.9818	0.499497	0.0126532	0.430514	64.4458	25.9293	0.385254	278.734	14.3204	0.656557	0.00568299	0.368703	278.812	45.7801	0.729045	0.00207351	0.260435	1081.85	56.7357
140172788		20161010	1	37	168.2	93.3	32.9784	91.4	0.543401	20161010	13.4	0.889	-0.8	-0.5	3.53	0.661	-1.5	-1.1	1257.32	45.3003	0.161829	3.1887	0.090779	2.11706	0.683888	0.0334292	0.579861	119.372	3.07243	0.534188	0.029337	0.533522	117.795	8.00595	0.694109	0.00902305	0.428461	455.585	11.7821	0.54286	0.0082211	0.37946	449.427	31.5582	0.698054	0.00275661	0.296808	1778.93	46.9249
130151544		20190605	2	72	161.2	60.1	23.1283	87.6	0.543424	20190605	6.97	0.646	-2.8	-0.6	2.68	0.55	-2.4	-0.5	1126.64	47.4363	0.634559	4.70043	0.794498	2.01111	0.719862	0.0350735	0.603974	33.7006	1.77258	0.752124	0.0363338	0.601143	33.7012	7.59222	0.73243	0.0094463	0.444269	123.628	6.50892	0.769719	0.00989922	0.373738	277.125	31.1591	0.848028	0.00219512	0.29791	1097.71	53.211
160168581	3	43462	1	60	171.5	70.8	24.0716	93.21	0.543499	43462	12.31	0.81	-0.8	-0.5	4.04	0.789	-0.4	0.5	1245.19	151.228	1.16357	4.36238	1.47232	1.62674	0.957216	0.0344689	0.668427	107.512	2.41502	0.935652	0.0300215	0.648913	106.862	6.21718	0.960286	0.0220373	0.530395	415.334	9.50862	0.938382	0.0185305	0.51157	412.541	24.7852	0.960974	0.0181689	0.406349	1632.57	38.2703
433918	3	20161104	2	46	162.5	70.6	26.7361	88.4	0.544	20161104	10.69	0.865	-0.9	-0.5	3.11	0.694	-1	-0.6	1260.14	46.4599	0.161637	3.78089	0.133092	1.54199	0.76888	0.040721	0.625151	122.282	1.88636	0.718776	0.0381009	0.598902	121.477	5.61822	0.785643	0.0113082	0.470371	466.355	7.06364	0.732718	0.0104486	0.441394	463.153	22.3579	0.787561	0.0034186	0.32767	1821.91	28.0981
543521		20191017	2	51	155.3	60	24.8776	84.5	0.544108	20191017	10.48	0.671	-2.6	-1.8	3.23	0.593	-2	-1.4	1248.55	67.4501	0.397265	3.72536	0.489036	3.04844	0.769437	0.0210791	0.545073	114.549	3.23053	0.751793	0.0203802	0.541481	113.924	11.768	0.778651	0.00611694	0.396434	437.38	12.6294	0.758843	0.00578108	0.392483	434.863	46.7805	0.780962	0.00219727	0.270579	1707.63	50.3328
120139275	3	20140721	1	47	173.1	84.6	28.2342	94.2	0.544194	20140723	13.52	0.942	8.66	0.666	-2.6	0	1.8	0.431	-3.5	-0.5	1100.56	56.9692	0.763513	3.86279	0.619961	1.42292	0.860176	0.0342719	0.638898	25.1047	1.76347	0.822868	0.031139	0.611233	24.5542	5.22292	0.389576	447.23	15.7608	0.681537	0.00550554	0.364404	445.318	48.569	0.759636	0.00201328	0.267769	1747.91	62.7321
140162756	3	20190419	1	50	173.8	80.2	26.5506	94.6	0.544304	20190419	15.03	0.967	-0.1	0.3	4.76	0.882	0.3	1	1285.63	53.2899	0.25047	3.297	0.147559	2.29068	0.730626	0.0288774	0.576582	145.147	3.38	0.604231	0.0249679	0.5273	144.598	8.69002	0.744687	0.00794379	0.42353	557.379	13.1778	0.615147	0.00683395	0.376896	555.173	34.305	0.748684	0.00261	0.292945	2182.58	52.2622
140163616		20151123	1	56	176.6	87	27.8957	96.2	0.544734	20151123	11.82	0.849	-1.1	-0.5	3.41	0.728	-1	-0.1	1161.96	61.0813	0.278387	3.6743	1.00699	4.18603	0.648807	0.0185619	0.497442	52.9846	6.21951	0.466432	0.016654	0.453199	51.8566	16.2853	0.655045	0.00534926	0.353318	197.056	24.3636	0.471461	0.00492241	0.312558	192.461	64.4772	0.657944	0.00195069	0.234909	761.351	96.9837
170157090	3	20181122	2	45	165.4	90.8	33.1906	90.1	0.54474	20181122	9.96	0.736	-2	-1.5	3.49	0.697	-1	-0.5	1188.62	54.2349	0.194758	3.99584	0.869496	2.42456	0.738057	0.0267734	0.569664	68.4953	2.65452	0.712346	0.0252906	0.552297	68.3414	9.05439	0.749931	0.00748812	0.415683	257.653	9.95065	0.724691	0.00704224	0.394913	257.103	35.8632	0.751205	0.00239527	0.283695	997.619	39.339
140103113	3	20190208	1	58	169.1	77.6	27.1378	92.2	0.54524	20190208	19.9	1.187	1.7	1.7	5.99	0.992	1.2	2.1	1212.47	72.5121	0.201469	3.29964	0.818995	6.04366	0.626399	0.012954	0.456237	86.3194	9.66066	0.401004	0.0112794	0.411625	84.4444	23.9133	0.629836	0.0038661	0.315226	326.101	38.352	0.405024	0.00338753	0.281189	318.746	94.9545	0.631596	0.0014108	0.203535	1268.88	152.684
160156247	3	43775	2	55	149.2	53.5	24.0335	81.35	0.545241	43775	7.65	0.647	-2.8	-1.2	2.7	0.57	-2.2	-0.9	1220.89	152.188	1.46464	5.64178	1.43334	1.01529	0.972557	0.0346872	0.724863	90.8918	1.70826	0.953066	0.030351	0.685513	89.981	3.66588	0.975905	0.0179349	0.584676	349.521	6.60368	0.955785	0.0146426	0.540655	345.846	14.4024	0.97664	0.0132574	0.449618	1372.01	26.4444
130044266		20190405	1	55	174.6	90.3	29.621	95.2	0.545246	20190405	13.33	0.888	14.68	0.957	-0.2	0.2	4.03	0.756	-0.7	0	1234.6	178.063	1.98054	7.69811	1.56486	1.55209	0.959004	0.0373598	0.681032	94.2916	2.21027	0.942365	0.0338186	0.645914	93.5832	5.99087	0.383026	379.079	18.9933	0.633755	0.00446199	0.333859	374.459	54.3023	0.739526	0.00183707	0.256956	1476.51	75.3636
130141062	3	20161122	1	48	177.7	84.7	26.8231	96.9	0.545301	20161122	15.25	0.957	-0.2	0.2	3.87	0.782	-0.5	0.2	1201.39	55.7582	0.0514104	3.17546	0.759673	3.78882	0.620314	0.020844	0.503216	76.6086	4.95517	0.501129	0.01942	0.484579	75.7601	14.7053	0.627205	0.00578947	0.354667	289.198	19.2142	0.51015	0.00543304	0.342092	285.902	58.5717	0.629041	0.00197542	0.237671	1122.03	76.4733
170034702	3	20170316	2	59	162.6	66.8	25.2659	88.7	0.54551	20170316	9.55	0.774	-1.7	-0.1	3.61	0.708	-0.9	0.7	1212.7	71.8935	0.805605	5.5127	0.806935	4.24316	0.703612	0.018437	0.49972	85.6164	3.6689	0.739266	0.0194859	0.523173	86.0126	16.663	0.708892	0.00536925	0.35366	323.564	14.4189	0.743316	0.00561468	0.375064	325.13	66.85	0.709545	0.00192777	0.237767	1260.45	57.7552
170023784	3	20190215	2	57	160.9	67.2	25.9572	87.8	0.545681	20190215	8.39	0.659	-2.7	-1	3.23	0.671	-1.2	0.2	1178.76	62.1858	0.547393	5.53714	0.984184	2.35355	0.794833	0.0241486	0.564395	63.0705	3.366	0.703658	0.0204838	0.522413	62.701	9	0.802994	0.00677849	0.420307	236.536	13.0335	0.711503	0.00566317	0.374579	235.039	35.5074	0.805393	0.00224223	0.286949	915.026	51.7035
140165452	3	20151228	2	62	161.4	67	25.7198	88.1	0.545849	20151228	10.52	0.799	-1.5	0.3	3.55	0.737	-0.6	1.2	1176.16	55.1474	0.501017	3.94787	0.968754	2.93274	0.694705	0.0252774	0.550698	60.4597	3.73661	0.606981	0.0228684	0.501585	60.0052	11.3045	0.705483	0.00698074	0.38935	227.273	14.8281	0.609964	0.00628565	0.350831	225.304	44.7088	0.708447	0.00230251	0.269646	878.564	58.8504
535309		20191010	2	45	157.7	57.4	23.0807	86.1	0.545973	20191011	9.94	0.724	-2.2	-1.3	3.52	0.723	-1	-0.2	1169.28	63.5276	0.405109	3.66466	0.995564	3.84393	0.698853	0.0191444	0.5086	57.8067	5.54545	0.557244	0.01734	0.468006	56.2846	14.8217	0.707109	0.00526437	0.364534	216.548	21.5346	0.565738	0.00482752	0.40063	254.507	25.814	0.808458	0.00283142	0.307928	993.085	38.5448
130032304		20130308	2	35	159.7	63.2	24.7803	87.2	0.546024	20130308	11.42	1.002	0.3	0.4	3.44	0.84	0.3	0.7	1350.63	70.4546	0.633791	4.90471	0.670375	1.30352	0.818261	0.0767511	0.697324	198.707	2.13649	0.677041	0.0665513	0.648452	198.28	4.93564	0.836042	0.0383397	0.554088	772.507	8.55946	0.69267	0.0336824	0.510348	770.398	19.6491	0.840612	0.0263218	0.426628	3045.89	34.1189
489683		20190527	2	77	165	75	27.5482	90.1	0.546061	20190527	9.99	0.763	-1.5	0.4	2.72	0.624	-1.8	0.8	1129.42	52.2664	1.06306	4.8497	0.819965	1.86965	0.783461	0.0385377	0.618756	35.6664	1.58047	0.81959	0.0391965	0.632043	36.0633	6.94786	0.795328	0.0108802	0.468507	131.33	5.9037	0.828749	0.0109436	0.475499	132.797	27.1651	0.79957	0.0032922	0.332124	503.41	23.0815
120121393		20151006	1	54	171.9	95.5	32.3185	93.9	0.546248	20151006	9.57	0.741	-2	-1.2	3.31	0.726	-1	-0.1	1230.84	52.8627	0.692931	7.29344	0.397018	2.26335	0.717684	0.0308733	0.578597	97.2879	2.35687	0.705014	0.0303163	0.558352	97.4474	8.39209	0.732981	0.00863147	0.426031	369.008	8.79677	0.718917	0.00841929	0.411002	369.551	33.5251	0.733496	0.00259789	0.292779	1437.11	34.9127
454989	3	20151127	2	58	160.9	65.6	25.3391	87.9	0.546302	20151127	11.556	0.753	-1.9	-0.2	3.39	0.672	-1.2	0.3	1130.86	45.6878	0.970336	10.4305	0.820405	1.62339	0.745245	0.0425671	0.623919	35.3745	1.46681	0.767657	0.0453327	0.641848	35.3694	6.01076	0.760764	0.0117598	0.469734	130.103	5.42424	0.781845	0.012329	0.479629	130.123	23.5079	0.76528	0.00352299	0.331888	497.037	21.285
160078309	3	20181119	2	38	159.6	69.6	27.3239	87.2	0.546366	20181119	7.83	0.687	-2.4	-2.2	2.71	0.65	-1.4	-1.1	1290.6	64.6095	0.192074	3.65171	0.363636	1.91463	0.830834	0.0273325	0.604076	150.413	2.00748	0.820581	0.0266824	0.606595	150.146	7.24187	0.840494	0.00809611	0.448483	577.919	7.4585	0.83386	0.007918	0.4576	577.082	28.7351	0.842405	0.00310753	0.315772	2264.97	29.6844
130032155	3	20130308	1	50	173.6	77.6	25.7491	94.9	0.546659	20130308	13.9	0.935	-0.4	0	4.12	0.707	-1.1	-0.4	1250.9	55.0482	0.227451	4.21323	0.283831	2.24815	0.753257	0.0299544	0.583675	114.75	3.19406	0.651861	0.026126	0.538374	113.786	8.48201	0.765005	0.00823549	0.429545	438.062	12.2466	0.663467	0.00720721	0.392362	434.334	33.3693	0.768153	0.00254808	0.296527	1709.54	48.4194
535353	3	20151005	1	47	168.8	72	25.269	92.3	0.546801	20151005	9.16	0.708	-2.3	-0.6	2.94	0.515	-2.7	-1.1	1219.68	53.7654	0.534079	4.62016	0.556914	2.29475	0.738703	0.0275315	0.572162	89.7211	2.54578	0.711413	0.0259975	0.551217	89.3045	8.73891	0.748285	0.007438	0.417438	340.052	9.66255	0.722832	0.00699895	0.39882	338.482	34.793	0.74983	0.00224443	0.282485	1323.42	38.3066
150146490		20191122	1	48	169.5	97.5	33.9364	92.7	0.546903	20191122	12.49	0.834	-1.3	-0.6	3.72	0.727	-1	-0.3	1197.6	54.398	0.901693	6.32745	0.785868	3.24745	0.631035	0.0250625	0.526078	73.4919	3.45471	0.614476	0.0246731	0.528364	73.471	12.4078	0.640982	0.00697815	0.380814	276.387	13.18	0.625228	0.00682557	0.37641	276.368	49.0967	0.644214	0.00217479	0.256303	1070.88	51.994
534421	3	20181204	1	56	181	86.8	26.4949	99	0.546961	20181204	15.43	1.005	0.2	0.3	3.84	0.791	-0.4	0	1201.95	63.2202	0.143651	3.27569	0.78461	3.24255	0.749113	0.0203101	0.535539	78.3165	4.07158	0.679843	0.0180819	0.49671	77.5187	12.4074	0.755756	0.00561623	0.389448	295.939	15.64	0.687205	0.00501714	0.351038	292.837	49.1154	0.757676	0.00188094	0.262264	1149.85	61.8787
180085819		20190710	1	61	174	97	32.0386	95.2	0.547126	20190710	20.34	1.18	1.6	1.6	4.45	0.809	-0.3	0.7	1184.14	102.565	1.31151	6.65568	1.21002	4.17256	0.831684	0.0151143	0.523814	69.6074	3.90009	0.842609	0.0152972	0.532144	69.9631	16.333	0.837502	0.00493629	0.383045	264.228	15.3534	0.847206	0.00508526	0.38662	265.443	65.1349	0.839682	0.00230178	0.271262	1030	61.2773
414584	3	43265	1	47	164.8	70.4	25.9214	90.21	0.547391	43265	12.37	0.863	-1	-0.5	4.32	0.825	-0.2	0.5	1272.69	137.007	1.48228	5.25875	1.22281	1.02302	0.959035	0.0464201	0.723653	121.711	2.00967	0.918339	0.0429518	0.690945	121.624	3.75448	0.963673	0.0262214	0.581396	470.426	7.92714	0.922025	0.0236319	0.549952	470.03	14.7801	0.964848	0.0200442	0.450563	1848.32	31.7621
240113		20170725	2	57	156.5	62.7	25.5999	85.7	0.547604	20170725	9.95	0.738	-2	-0.4	3.22	0.681	-1.1	0.3	1163.34	68.7392	1.15085	6.24571	1.05696	2.81111	0.798473	0.0222445	0.560049	54.9107	2.6599	0.805224	0.0227474	0.563048	54.5349	10.8018	0.806566	0.00625342	0.409352	205.665	10.2474	0.812469	0.00623318	0.407973	204.16	42.7203	0.80896	0.00208034	0.282528	796.109	40.5979
557318	3	20150421	1	31	176.5	91.2	29.2756	96.7	0.547875	20150421	10.63	0.84	7.96	0.68	-2.5	-1.8	2.51	0.497	-2.8	-2.2	1216.28	66.5824	0.520084	3.17647	0.773384	1.33703	0.902795	0.0303422	0.660255	90.8581	1.38	0.89985	0.0290821	0.648019	90.8289	5.00443	0.388636	418.19	13.2278	0.689324	0.00620311	0.374445	414.923	52.8947	0.694675	0.00213483	0.267487	1632.66	52.4369
423947		20180102	2	54	165	74.6	27.4013	90.4	0.547879	20180102	14.71	0.958	-0.1	0.8	3.6	0.671	-1.2	-0.2	1207.56	66.5115	1.31018	9.80375	0.793155	2.64226	0.773787	0.024066	0.570694	81.4089	3.22361	0.720684	0.0219928	0.544403	80.9809	9.96786	0.784551	0.00672406	0.419797	307.913	12.4287	0.728569	0.0061874	0.393446	306.12	39.3821	0.787624	0.00219955	0.284662	1197.33	49.2791
130037875		20130319	1	50	168.8	97.1	34.078	92.5	0.547986	20130319	17.47	1.034	0.4	0.7	3.78	0.73	-0.9	-0.2	1208.49	51.7851	0.427084	4.74388	0.604546	2.9623	0.643111	0.0268172	0.535709	80.8307	3.34551	0.599577	0.0268664	0.542482	80.6505	11.2163	0.657263	0.0075542	0.385369	305.299	12.8246	0.610553	0.00750853	0.394111	304.61	44.4365	0.659506	0.00238655	0.255564	1186.55	50.6405
549349	3	20150924	1	44	176.4	79.2	25.4524	96.7	0.548186	20150924	14.21	0.948	-0.3	0.1	4.14	0.853	0.1	0.7	1268.83	64.4779	-0.222759	4.52932	0.370066	3.13211	0.745122	0.0222028	0.53796	130.496	3.2496	0.726883	0.0222151	0.532293	131.363	12.2732	0.749815	0.00616454	0.388718	498.657	12.6895	0.732968	0.00618827	0.381415	502.015	48.8284	0.751835	0.00206039	0.268916	1948.67	50.5893
395339		20171106	1	46	172.4	79.8	26.849	94.6	0.548724	20171106	11.81	0.881	-0.9	-0.3	3.32	0.708	-1.1	-0.4	1210.94	66.2718	0.240144	3.25452	0.748066	3.48465	0.748107	0.0188325	0.527176	85.1861	3.24178	0.759068	0.0191865	0.5226	84.9001	13.4143	0.755142	0.00533094	0.382308	322.824	12.3727	0.767401	0.00538701	0.3791	321.798	53.1451	0.758017	0.00185684	0.255995	1254.89	49.0206
503884		20200724	2	47	159.8	65.8	25.7675	87.7	0.548811	20200724	17.47	1.077	0.9	1.1	3.84	0.779	-0.2	0.2	1275.23	55.7473	1.34719	8.22918	0.162148	1.5376	0.804287	0.0373961	0.632263	134.404	2.37092	0.692939	0.0315061	0.574678	132.894	5.66972	0.819813	0.0104683	0.477444	515.374	9.05204	0.707103	0.00854227	0.41987	509.389	22.377	0.823338	0.0032605	0.337879	2017.42	36.1179
402504	3	20150930	1	41	175.1	82.5	26.908	96.1	0.548829	20150930	14.72	0.906	-0.7	-0.3	3.96	0.758	-0.7	-0.2	1228.58	45.9925	0.136186	3.01004	0.309543	2.73182	0.604987	0.0290473	0.537002	95.2288	3.07739	0.547776	0.0285345	0.528941	94.8621	10.4038	0.617462	0.00807277	0.390319	361.821	11.9157	0.554999	0.00789712	0.379803	360.429	41.1068	0.619207	0.00263315	0.269519	1407.05	46.9073
130038528		20130320	1	50	170.5	90.7	31.2003	93.6	0.548974	20130320	10.26	0.744	-2	-1.2	3.43	0.649	-1.6	-0.8	1162.19	44.4869	0.219455	3.24977	0.994844	2.45745	0.618378	0.0331242	0.566884	51.0733	2.53036	0.602569	0.0333794	0.567587	50.5125	9.36643	0.629511	0.00892463	0.408447	190.285	9.50952	0.619152	0.00900865	0.417007	188.143	36.9433	0.632048	0.002647	0.279846	733.879	37.8333
231542	3	20180612	2	39	157.5	58.6	23.6231	86.5	0.549206	20180612	10.27	0.783	-1.6	-0.1	2.45	0.521	-2.6	-1.2	1138.31	60.3036	0.683402	4.85589	0.952286	4.32438	0.622815	0.019297	0.484907	40.3967	4.21667	0.622861	0.0197328	0.497672	39.791	16.8512	0.627669	0.00545272	0.338644	149.189	16.2264	0.632615	0.00564236	0.404608	414.192	40.5413	0.776042	0.00234442	0.288052	1628.82	43.5636
180047873	3	20191128	1	56	170.6	77.5	26.6283	93.7	0.549238	20191128	13.22	0.923	-0.5	0	3.43	0.682	-1.3	-0.4	1227.58	60.2986	0.524301	3.69166	0.504837	3.1625	0.718128	0.0231891	0.537103	96.3079	3.47924	0.68832	0.0226052	0.518992	95.3289	12.1711	0.725833	0.00651749	0.385807	366.044	13.4285	0.696084	0.00641597	0.375201	362.151	48.1961	0.729636	0.00210959	0.260775	1426.44	53.3698
352920	3	20170120	2	63	163.1	67.9	25.5248	89.6	0.549356	20170120	9.55	0.711	-2.2	-0.3	3.04	0.637	-1.5	0.2	1176.56	69.1395	0.22096	2.94884	0.972225	3.95772	0.741211	0.0160576	0.49974	62.957	4.38991	0.714036	0.0152013	0.491882	63.0646	15.3665	0.748133	0.0046599	0.35705	236.533	17.2827	0.717557	0.00436527	0.345438	236.925	60.9302	0.749778	0.00164932	0.240629	917.525	68.3089
130171618		20190902	1	78	173.8	82.8	27.4114	95.5	0.549482	20190902	18.13	1.13	1.2	1.4	4.31	0.816	-0.2	1.2	1215.98	80.5972	3.02922	27.2253	0.770943	3.1045	0.765641	0.0210212	0.55267	86.5897	2.79825	0.788452	0.0210112	0.552905	86.6033	12.0121	0.773982	0.00584039	0.40057	328.681	10.7427	0.797537	0.00582183	0.403018	328.743	47.6096	0.776104	0.00184927	0.274936	1279.28	42.7325
507694	3	20131002	2	53	159.6	63	24.7329	87.7	0.549499	20131002	9.06	0.702	-2.3	-1.1	2.44	0.523	-2.6	-1.7	1136.85	60.3603	0.538148	4.30897	0.932783	4.14037	0.642893	0.0202295	0.499551	39.9599	3.82626	0.654591	0.0212001	0.51172	39.371	16.1711	0.650359	0.00561658	0.348939	147.782	14.9448	0.661231	0.00578218	0.363365	145.425	64.6611	0.651235	0.00194547	0.233815	567.206	59.4202
555189	3	20190424	2	53	163.6	59.1	22.0811	89.9	0.549511	20190424	14.11	1.088	1	1.3	4.67	0.925	1.1	1.6	1306.5	78.6936	0.307579	2.73071	0.629404	3.12907	0.776293	0.0373639	0.576522	160.959	2.72973	0.802537	0.0381913	0.594612	160.475	12.3358	0.78783	0.0196732	0.438458	622.504	10.7486	0.812669	0.0191314	0.358339	129.054	40.4704	0.707214	0.00232563	0.264432	507.212	57.7888
140155776		20180906	2	86	157.2	61.4	24.8464	86.4	0.549618	20180906	8.66	0.666	-2.6	0	1.8	0.431	-3.5	-0.5	1100.56	56.9692	0.763513	3.86279	0.619961	1.42292	0.860176	0.0342719	0.638898	25.1047	1.76347	0.822868	0.031139	0.611233	24.5542	5.22292	0.87138	0.00962728	0.481232	91.4286	6.66667	0.832208	0.00847143	0.452916	89.2501	20.4505	0.873991	0.00291287	0.34134	348.128	26.4385
414584		20190716	1	48	169.2	92.9	32.45	93	0.549645	20190716	13.62	0.902	-0.7	-0.2	4.04	0.767	-0.6	0.1	1223.49	56.9907	0.318701	3.64132	0.557549	4.16667	0.589517	0.0208234	0.505106	92.0341	3.98826	0.60783	0.0209235	0.503578	92.1108	16.1225	0.597843	0.00595988	0.354423	348.957	15.4314	0.615539	0.0059087	0.354526	349.302	63.7543	0.601294	0.00211195	0.238192	1357.28	61.0851
468346		20190318	1	62	173.7	82.1	27.2109	95.5	0.549799	20190318	12.01	0.856	-1.1	-0.3	3.39	0.69	-1.3	-0.3	1178.15	61.5518	0.439304	3.81785	0.996694	3.80171	0.677951	0.0195632	0.510583	62.2547	3.72941	0.684952	0.0196668	0.515137	62.6293	14.8336	0.685	0.00536197	0.36314	233.454	14.5383	0.691804	0.00541646	0.364819	234.823	59.0638	0.686219	0.00179252	0.244845	904.186	57.6997
130152349		20171027	1	33	168.4	75.4	26.5881	92.6	0.549881	20171027	10.16	0.769	-1.8	-1.5	3.65	0.698	-1.2	-0.9	1198.29	54.3062	0.277815	3.40305	0.767701	4.29739	0.543744	0.022183	0.504569	73.8415	4.10975	0.560956	0.0222753	0.499767	73.6069	16.7868	0.5492	0.0061408	0.363554	278.378	16.0467	0.566058	0.00624949	0.350453	277.39	66.9297	0.549208	0.00217064	0.24424	1080.99	63.6446
327469		20181212	1	53	180.2	92.5	28.486	99.1	0.549945	20181212	12.88	0.866	16.03	1.073	0.7	1	4.05	0.745	-0.8	0.1	1263.47	80.5965	0.590053	4.25192	0.637319	4.54651	0.726335	0.0167361	0.505318	124.841	6.25758	0.613309	0.0146469	0.463646	123.128	17.925	0.391245	184.376	13.2801	0.711725	0.00620287	0.385767	182.517	43.686	0.763728	0.00218655	0.263287	711.122	53.0964
414616	3	41962	1	48	168.8	76.7	26.9185	92.84	0.55	41962	17.94	1.054	0.6	0.8	5.06	0.954	0.9	1.6	1298.93	173.851	0.936495	3.73074	1.5842	1.30176	0.96519	0.0820201	0.737819	135.478	2.2852	0.938175	0.0720042	0.710855	134.948	5.05294	0.967554	0.0644796	0.613459	528.129	9.26025	0.939785	0.0564087	0.587881	525.824	19.9571	0.96859	0.0586692	0.50462	2085.03	37.4807
150153098	3	20170525	2	34	160.1	63.5	24.7737	88.1	0.550281	20170525	14.52	1.033	0.6	0.6	4.33	0.876	0.7	1	1285.02	58.7794	1.24534	7.96851	0.189495	1.57355	0.809469	0.0330962	0.620805	144.169	2.47905	0.696946	0.028141	0.581071	141.935	5.73549	0.827185	0.0096707	0.470984	553.106	9.52432	0.70916	0.00779858	0.428925	544.046	22.4285	0.831336	0.00347399	0.330273	2166.07	37.7176
434102	3	20171227	1	62	171.9	77.2	26.1256	94.6	0.55032	20171227	13.64	0.85	-1.1	-0.3	4.42	0.821	-0.2	0.8	1141.72	79.9058	1.04886	6.93606	1.04439	6.02083	0.650333	0.0139088	0.472718	43.1022	6.47279	0.628547	0.0131038	0.443705	43.4156	23.9819	0.654499	0.00413975	0.332102	160.122	25.8646	0.632442	0.00395946	0.307183	161.337	96.2251	0.655337	0.00161146	0.219664	616.851	102.721
130162287	3	20170607	2	59	162.2	77.5	29.4578	89.3	0.550555	20170607	9.61	0.735	6.89	0.579	-3.4	-2.7	3.07	0.568	-2.2	-1.7	1159.64	56.8576	0.0728949	3.36495	0.999598	3.03929	0.708826	0.0226745	0.525764	51.4907	3.8084	0.629955	0.0215329	0.505189	51.3554	11.7236	0.462546	144.272	10.2757	0.682671	0.00817286	0.403062	140.805	24.497	0.808396	0.00290816	0.324175	553.102	40.6673
170133153		20170926	2	44	154.5	61.2	25.6386	85.1	0.550809	20170926	11.17	0.851	-1	-0.7	3.53	0.798	-0.1	0.4	1205.77	66.4825	0.0910587	3.26012	0.770148	5.73946	0.582902	0.0157404	0.46493	80.2203	4.73842	0.659172	0.0163366	0.484106	81.2442	22.9349	0.583936	0.00481863	0.322383	303.171	18.5618	0.666688	0.00493433	0.336267	307.426	91.4464	0.585192	0.00190286	0.210366	1177.77	73.9208
130160027		20161006	2	36	165.9	78.6	28.5581	91.4	0.550934	20161006	10.41	0.811	14.28	0.86	-1	-0.4	4.04	0.722	-1	-0.1	1204.39	69.7345	0.302761	3.27374	0.847145	5.07702	0.667368	0.0150649	0.478238	80.3402	4.73938	0.684133	0.0154258	0.487319	80.7696	20.0193	0.486884	523.707	9.5205	0.736497	0.0075415	0.415425	521.63	20.445	0.863709	0.00309335	0.350496	2051.35	37.7455
560573	3	43874	1	67	160	66.4	25.9375	88.15	0.550938	43874	11.19	0.814	-1.4	-0.5	3.23	0.645	-1.6	-0.5	1203.2	150.031	1.35518	5.38226	1.40215	1.35588	0.964487	0.0268286	0.69032	82.8838	2.99112	0.920904	0.0224461	0.643242	81.6938	5.14265	0.967264	0.0134275	0.545341	318.409	11.9921	0.922877	0.0103541	0.500064	313.5	20.4039	0.967946	0.00979912	0.420667	1247.98	48.2179
537987		20200729	2	60	163.5	77.8	29.1034	90.1	0.55107	20200729	13.17	0.885	12.29	0.837	-1.2	-0.6	4.07	0.761	-0.7	0.1	1215.24	66.2674	0.206028	3.27975	0.718212	5.64147	0.594157	0.0151325	0.46788	87.1596	4.32078	0.688582	0.0166377	0.49135	87.8799	22.0853	0.431895	65.8237	10.78	0.591553	0.00870233	0.400023	63.9779	32.6006	0.691587	0.00287544	0.294125	247.581	42.9216
482608	3	20150916	1	54	178.9	82.2	25.6833	98.6	0.551146	20150916	15.83	1.011	0.2	0.6	3.63	0.701	-1.2	-0.3	1213.46	54.0712	0.482821	4.80438	0.595967	2.70489	0.695276	0.028087	0.558678	84.5261	3.23446	0.63783	0.0264745	0.532775	84.3172	10.1868	0.7104	0.00758549	0.405895	319.809	12.4516	0.647961	0.00718054	0.387213	318.847	40.4142	0.712771	0.00223375	0.273639	1243.03	49.3047
160020593	3	20200603	1	50	169.1	72.3	25.2843	93.2	0.551153	20200526	12.07	0.755	-1.2	-0.9	3.33	0.598	-2.5	-1.5	1160.62	36.3327	0.681666	8.49378	0.99806	1.43293	0.658173	0.05953	0.634756	49.6628	1.21123	0.705832	0.0639438	0.668641	49.5763	5.22744	0.676097	0.0166679	0.478223	184.311	4.37668	0.724624	0.0178551	0.51017	184.031	20.3933	0.682032	0.00466166	0.339837	709.688	16.9505
241311		20151021	1	59	177.6	93.9	29.7701	97.9	0.551239	20151021	10.04	0.771	10.55	0.731	-2.1	-1.3	2.87	0.552	-2.3	-1.7	1162.15	53.6802	0.182909	3.93266	0.996865	2.31389	0.749771	0.0285078	0.578306	52.4517	2.85213	0.683112	0.0259297	0.541939	51.709	8.73436	0.420139	341.125	9.99493	0.745994	0.00684172	0.409015	339.735	34.537	0.780894	0.00219638	0.287964	1327.75	39.241
150082295	3	43109	1	51	167.7	74	26.3127	92.49	0.551521	43109	13.34	0.992	0.1	0.4	3.6	0.728	-1	-0.2	1173.76	119.45	1.62624	5.80207	1.2117	1.26941	0.959494	0.0310119	0.685111	64.8734	1.33758	0.955512	0.0323188	0.685648	63.9509	4.67802	0.963538	0.0107206	0.536657	246.869	5.0503	0.958759	0.0113807	0.529662	243.334	18.4851	0.964358	0.00495312	0.398983	962.635	19.8158
536515	3	20181130	1	75	179.5	88.1	27.3431	99	0.551532	20181130	10.72	0.726	-2.1	-0.3	2.6	0.562	-2.3	-0.7	1142	65.6914	0.670242	4.51801	0.980624	2.3956	0.820046	0.0232955	0.582927	43.8645	3.48892	0.734474	0.0194302	0.526482	42.8389	9.05266	0.829153	0.00636078	0.425905	162.861	13.4908	0.742235	0.00543146	0.376679	158.828	35.6658	0.831812	0.00195478	0.293072	627.153	53.6967
120031137	3	43259	1	50	169	84.9	29.7258	93.25	0.551775	43259	19.79	1.207	9.95	0.773	-1.7	-0.1	2.61	0.534	-2.5	-1	1176.64	65.939	0.294213	3.12209	0.967094	3.56461	0.741551	0.0189167	0.529441	63.1208	4.33252	0.691856	0.0173188	0.507628	62.4711	13.6383	0.511346	273.807	9.84449	0.927417	0.00778593	0.480744	272.08	24.226	0.956151	0.00546085	0.375724	1070.09	39.3371
438527	3	20141124	1	41	178.8	82.4	25.7746	98.7	0.552013	20141125	15.17	0.901	-0.7	-0.3	4.74	0.895	0.4	0.9	1227.48	51.3941	-0.00847984	3.82198	0.385853	3.17503	0.619552	0.0272564	0.527285	94.7156	3.18928	0.60162	0.0278504	0.543829	95.0665	12.4015	0.626447	0.00751248	0.379907	359.252	12.4625	0.60758	0.00758001	0.391602	360.453	49.3829	0.62757	0.00235702	0.256206	1398.85	49.4503
130122654		20161110	1	51	179.3	88.6	27.5596	99	0.552147	20161110	15.83	0.898	-0.7	-0.2	4.67	0.746	-0.8	0	1204.01	59.9755	0.379869	3.57975	0.781829	4.83527	0.574113	0.0180211	0.476545	78.7681	5.18571	0.53826	0.0177509	0.476203	77.7208	18.8249	0.578652	0.00509952	0.33207	297.67	20.0961	0.54532	0.00503626	0.331211	293.547	75.0801	0.579174	0.00187288	0.219668	1154.44	79.9221
440674	3	20181217	2	53	164.7	75	27.6487	91	0.55252	20181217	8.44	0.688	-2.4	-1.1	2.66	0.65	-1.4	-0.4	1154.68	48.3181	0.573256	4.10615	0.993493	1.33806	0.825249	0.0410477	0.636801	48.2518	2.09702	0.716197	0.0352516	0.585387	47.2583	4.89303	0.837718	0.0113683	0.478938	179.23	7.87143	0.729393	0.00964427	0.428153	175.3	19.0721	0.840946	0.0033938	0.334878	691.467	30.85
419858	3	42683	1	47	172.3	75	25.2633	95.23	0.552699	42683	13.78	0.918	-0.6	-0.1	4.21	0.746	-0.8	-0.1	1162.33	155.23	2.1524	8.36218	1.22533	1.45511	0.961982	0.0306818	0.679907	58.6342	2.05016	0.945259	0.0319507	0.69195	57.6886	5.54334	0.96463	0.0115282	0.528833	223.802	8.05747	0.947433	0.0112671	0.540178	220.111	21.855	0.965497	0.00598427	0.395053	875.098	32.2994
531451	3	20200723	2	53	161	64.2	24.7676	89	0.552795	20200723	9.08	0.813	-1.3	-0.7	2.86	0.585	-2	-1.4	1205.76	59.483	0.877748	4.22832	0.758403	1.86681	0.831101	0.0293992	0.59778	80.8358	3.27841	0.699592	0.0235162	0.533577	79.9489	7	0.841015	0.00820586	0.44639	305.881	12.5405	0.711467	0.00655548	0.383926	302.376	27.3763	0.843829	0.00259888	0.309997	1188.82	49.3956
453313		20180330	1	49	173.6	88.1	29.2332	96	0.552995	20180330	16.2	0.983	8.87	0.786	-1.6	-1.2	3.04	0.669	-1.3	-0.7	1196.21	104.29	1.95888	7.00131	1.28379	0.757818	0.968274	0.0624497	0.772667	75.6378	0.892113	0.960493	0.0579449	0.743663	74.4353	2.56582	0.374981	248.104	19.4023	0.560932	0.0051414	0.33909	241.544	47.6279	0.729501	0.00193844	0.251608	960.14	76.8756
170165419	3	20171205	1	74	171.4	78.9	26.8569	94.8	0.553092	20171205	14.32	0.937	-0.4	0.4	3.57	0.666	-1.5	-0.1	1217.36	63.1364	0.463071	4.25858	0.647108	3.00682	0.752552	0.0224186	0.545731	89.3045	3.24501	0.732104	0.022067	0.545433	88.9305	11.5449	0.761809	0.0061015	0.39389	338.956	12.3538	0.744457	0.00609183	0.395315	337.56	45.7153	0.763045	0.00195054	0.269145	1318.92	48.3339
557327	3	20140722	1	34	178.2	86	27.0821	98.6	0.553311	20140722	10.63	0.788	-1.6	-0.4	3	0.609	-1.8	-0.8	1246.3	41.7267	0.346174	3.61415	0.0728889	1.203	0.787992	0.0485525	0.663842	109.823	1.70789	0.686818	0.043371	0.624092	108.538	4.3095	0.805376	0.0133535	0.50096	418.455	6.34037	0.701527	0.0118189	0.466162	413.3	16.7075	0.809563	0.003813	0.356099	1631.38	24.8497
548447	3	43993	2	88	154	50.6	21.3358	85.21	0.553312	43973	8.94	0.689	-2.2	0.2	2.37	0.524	-3		1146.87	167.601	1.45037	4.62794	1.24897	2.25213	0.955973	0.0567746	0.709572	59.2053	3.5828	0.92967	0.0483571	0.665027	59.0726	8.85638	0.958086	0.0331258	0.590305	227.521	14.3819	0.931611	0.0293096	0.535818	226.91	35.5335	0.958652	0.0246429	0.474016	893.08	58.0037
170100717		20200803	1	32	174.2	89.9	29.6253	96.4	0.553387	20200803	12.2	0.768	12.1	0.785	-1.7	-0.7	3.78	0.741	-0.8	0.1	1227.37	56.8022	-0.0652355	3.51635	0.475376	3.65	0.642028	0.0220291	0.507289	95.975	3.4439	0.6567	0.0233565	0.524853	96.0602	14.2282	0.429566	303.281	12.031	0.616333	0.00796272	0.396215	300.53	38.7467	0.697915	0.00264012	0.297869	1178.99	47.5787
160168743	2	44026	1	57	162.2	54	20.5254	89.78	0.553514	44008	7.3	0.566	-2.2	-1.7	2.71	0.514	-3.4	-2.2	1147.19	199.315	1.62244	5.48174	1.33632	1.47141	0.974675	0.112125	0.749463	59.5618	2.60148	0.953539	0.106488	0.716824	57.9792	5.65824	0.976672	0.0705017	0.63162	230.263	10.3575	0.955544	0.0634376	0.598779	223.933	22.6981	0.97708	0.0549616	0.53417	906.213	41.8642
447321		20200512	2	63	166.5	74.4	26.8376	92.2	0.553754	20200512	7.43	0.655	-2.7	-0.7	2.92	0.642	-1.5	0.3	1143.22	44.4637	-0.104412	3.29602	0.955481	1.89744	0.701902	0.0374442	0.593028	41.4315	2.69118	0.580599	0.0322491	0.557299	40.7875	7.18462	0.714675	0.0104566	0.436174	152.936	10.4029	0.590104	0.00888084	0.402627	150.343	27.9758	0.719748	0.00325726	0.299312	586.694	40.8735
483991		20200114	1	61	173	93.3	31.1738	95.8	0.553757	20200114	9.14	0.783	-1.7	-0.8	3.38	0.635	-1.7	-0.7	1189.95	56.8639	0.184131	3.52269	0.849864	1.82572	0.81939	0.0305862	0.61255	69.7512	2.07851	0.799875	0.0282758	0.585666	69.9227	6.90385	0.827851	0.00833979	0.454387	262.691	7.75289	0.811913	0.00776121	0.428434	263.389	27.25	0.830269	0.00262054	0.314834	1018.88	30.706
130036070		20130315	1	37	168.3	94.8	33.4688	93.2	0.553773	20130315	19.2	1.196	1.8	1.6	5.12	0.94	0.8	1.2	1294.95	73.8055	0.886209	5.01237	0.439825	4.01542	0.656263	0.0211634	0.521761	149.503	4.04182	0.650655	0.0218405	0.528672	149.185	15.9075	0.666734	0.00765998	0.379385	575.636	15.8018	0.665442	0.00761983	0.383773	574.39	63.805	0.670677	0.00428978	0.26924	2257.75	63.5127
150090436		20190429	2	55	159.8	61	23.8878	88.5	0.553817	20190429	9.91	0.705	-2	-0.9	3.49	0.65	-1.6	0
248264	3	42594	1	62	164.1	72.4	26.8857	90.89	0.55387	42594	14.25	0.867	-1	-0.2	3.89	0.774	-0.6	0.4	1234.57	171.6	1.22641	3.91935	1.57365	1.2556	0.971565	0.0500459	0.705572	97.1173	2.27128	0.947065	0.0439749	0.683583	94.9262	4.71805	0.974072	0.0344691	0.567165	376.318	9.0266	0.948848	0.0280475	0.550387	367.497	18.7042	0.974708	0.0287815	0.451963	1481.76	36.2806
140171970		20181119	1	72	172.6	90.9	30.5128	95.6	0.553882	20181119	12.12	0.814	9.33	0.724	-1.9	0.1	2.37	0.54	-2.8	-0.2	1167.83	145.177	1.39979	4.89465	1.29928	1.43775	0.967238	0.0337368	0.705523	67.9944	4.17236	0.904443	0.0269443	0.632667	66.59	5.51923	0.385254	278.734	14.3204	0.656557	0.00568299	0.368703	278.812	45.7801	0.729045	0.00207351	0.260435	1081.85	56.7357
495796	3	42905	2	56	157.6	61.8	24.8815	87.32	0.554061	42905	10.71	0.857	-1	0.3	3.11	0.613	-1.8	-0.5	1238.92	69.0179	0.533508	3.00394	0.54881	1.0155	0.929276	0.0333038	0.70165	108.043	0.893595	0.937854	0.0352131	0.715091	108.088	3.55245	0.938375	0.00966902	0.550267	411.958	3.10176	0.946177	0.0100627	0.556845	412.139	13.7628	0.940569	0.00298994	0.397219	1610.07	11.9917
130042925		20130327	2	32	161.8	62.2	23.7593	89.7	0.554388	20130327	13.06	1.116	1.3	1.3	4	0.925	1.1	1.5	1376.07	92.2574	0.926957	6.66049	0.988269	1.24985	0.841573	0.136008	0.723932	211.422	2.75	0.609867	0.117093	0.657068	211.131	4.94514	0.853169	0.0941231	0.603541	825.733	11.2709	0.627605	0.074383	0.527003	824.289	19.6571	0.858758	0.0797862	0.498006	3266.44	45.2344
412708		20150514	1	60	172.8	94.9	31.7818	95.8	0.554398	20150514	15.1	1	0.1	0.5	3.74	0.705	-1.1	-0.2	1238.23	88.7636	2.83372	19.6843	0.692022	4.68006	0.654831	0.0172471	0.497269	99.9948	4.97599	0.628835	0.0170528	0.48331	99.8147	18.4576	0.661533	0.00515187	0.356606	381.114	19.7382	0.633766	0.00501157	0.345102	380.315	73.785	0.662368	0.00198523	0.239206	1485	78.4771
150062134	3	43612	1	57	174.8	90.4	29.586	96.91	0.554405	43612	20.04	1.203	10.52	0.874	-0.8	0.1	3.91	0.872	0.6	1.6	1285.45	66.62	0.336408	3.36156	0.416215	2.15913	0.814582	0.0282504	0.606796	145.097	3.4447	0.705033	0.0222865	0.530458	143.275	8.33333	0.628539	643.098	4.77273	0.955057	0.0756637	0.598728	637.411	20.3199	0.953641	0.0768125	0.52178	2541.11	19.2159
130152226	3	20160928	1	58	174.2	81.8	26.9561	96.6	0.554535	20160928	12.2	0.887	-0.8	-0.2	4.43	0.781	-0.5	0.4	1177.37	109.09	1.8172	11.8131	1.15747	7.86855	0.696375	0.00946655	0.443075	64.0786	7.35617	0.716824	0.00960372	0.447256	64.0556	31.4152	0.700142	0.00286826	0.309665	241.965	29.2562	0.721569	0.00304298	0.311661	241.998	126.236	0.701215	0.00131377	0.205767	939.832	116.888
170133182		20190719	1	36	180.3	97.3	29.931	100	0.554631	20190719	14.35	0.879	10.31	0.788	-1.6	-0.2	3.03	0.614	-1.8	-0.5	1137.9	52.1475	0.495886	4.89131	0.927865	2.4538	0.710042	0.0291174	0.572271	39.4321	2.87179	0.663695	0.0268405	0.540009	39.1877	9.35652	0.368655	358.198	15.7972	0.658798	0.00557213	0.371136	355.434	62.7023	0.667467	0.00184627	0.247004	1396.74	62.9167
548937		20190417	2	75	155.2	62.1	25.7815	86.1	0.554768	20190417	14.02	0.933	-0.4	-0.4	4.41	0.805	-0.3	-0.1	1141.19	55.8968	0.788661	5.76142	0.97279	2.2186	0.769294	0.0277579	0.575633	41.3217	1.99451	0.794831	0.0285706	0.587147	41.3386	8.41705	0.777632	0.00786852	0.41822	152.989	7.3315	0.808732	0.0080151	0.432691	153.212	33.2442	0.77988	0.00255393	0.283867	587.567	28.8574
431433		20180112	1	65	168.5	94.3	33.2133	93.5	0.554896	20180112	14.24	0.92	-0.5	0.1	4.24	0.773	-0.6	0.4	1250.05	58.0868	0.223095	3.50454	0.326149	3.457	0.670647	0.0216029	0.517078	113.873	4.88272	0.524911	0.0192631	0.485258	113.296	13.524	0.677418	0.00595385	0.366629	434.362	19.2901	0.530638	0.00527892	0.336563	431.956	53.6597	0.680551	0.00198613	0.24441	1694.08	76.5037
458884	3	20191023	2	73	160.5	62.1	24.1069	89.1	0.55514	20191023	8.35	0.662	-2.7	-0.3	2.3	0.493	-2.9	-0.8	1123.57	62.1984	0.192318	3.10832	0.86547	2.95032	0.751314	0.0223152	0.560512	34.6162	4.1629	0.652819	0.0184521	0.501484	33.8532	11.4535	0.757603	0.00631523	0.41311	127.634	16.3153	0.658515	0.00549558	0.355156	124.635	45.5216	0.758758	0.00226902	0.279435	488.204	64.7605
190072964	3	20200626	2	40	165.5	78.4	28.6233	91.9	0.555287	20200626	9.13	0.8	7.09	0.57	-3.2	-0.8	2.02	0.438	-3.9	-0.8	1041.02	132.745	3.23383	16.7439	0.61365	1.0121	0.955087	0.301458	0.833595	17.5282	1.05079	0.952609	0.303263	0.821981	17.9566	3.97581	0.440987	346.304	10.6644	0.695041	0.00778319	0.400556	348.057	33.5061	0.75566	0.0026963	0.30089	1348.97	42.2415
120121238		20150825	2	36	161.3	66.3	25.4827	89.6	0.555487	20150825	13.6	0.966	0	0.1	3.77	0.797	-0.1	0.3	1287.78	60.0634	1.292	5.35792	0.269784	1.38482	0.830329	0.0389686	0.64624	144.087	1.81351	0.773134	0.035935	0.619752	142.934	5.02642	0.848977	0.0124154	0.498371	553.998	6.88311	0.788709	0.0105707	0.466551	549.273	19.6768	0.853436	0.00502346	0.362926	2169.39	27.2041
535397		20161123	1	72	169.2	96.5	33.7075	94	0.555556	20161123	8.1	0.673	-2.3	-0.3	2.39	0.501	-2.8	-0.8	1142.01	65.8307	0.241063	2.92613	0.970832	3.94324	0.710698	0.0167265	0.510704	43.3204	4.18763	0.690029	0.0162463	0.48937	43.1143	15.2162	0.720014	0.00471745	0.363775	160.401	16.4054	0.695401	0.00459671	0.347648	159.484	60.6001	0.720733	0.00159538	0.24257	617.491	65.3903
433918	3	20171204	2	47	162.5	70.6	26.7361	90.3	0.555692	20171204	11.05	0.868	-0.9	-0.4	3.13	0.695	-1	-0.5	1265.05	46.0801	0.372807	3.5731	0.0653343	1.48194	0.772797	0.038751	0.624745	126.487	1.69408	0.737577	0.0358373	0.608409	125.493	5.56875	0.785719	0.010679	0.46521	482.472	6.19024	0.758585	0.00996151	0.454399	478.661	21.8792	0.788641	0.00320698	0.32617	1883.13	24.2927
160074837	3	20200529	1	48	178.3	81.4	25.6048	99.1	0.555805	20200529	15.7	0.887	-0.8	-0.3	4.01	0.767	-0.6	0.1	1157.64	63.4985	0.913433	7.27104	1.03463	3.47045	0.704027	0.0210499	0.520411	50.4638	4.92045	0.582135	0.0183538	0.479377	49.617	13.3943	0.71161	0.00581214	0.373301	187.812	19.0833	0.591015	0.00504557	0.335584	184.522	53.3546	0.71295	0.00180161	0.250806	724.413	75.9896
130042925	3	20130327	2	32	160.1	64.5	25.1638	89	0.555903	20130327	13.06	1.116	1.3	1.3	4	0.925	1.1	1.5	1376.07	92.2574	0.926957	6.66049	0.988269	1.24985	0.841573	0.136008	0.723932	211.422	2.75	0.609867	0.117093	0.657068	211.131	4.94514	0.853169	0.0941231	0.603541	825.733	11.2709	0.627605	0.074383	0.527003	824.289	19.6571	0.858758	0.0797862	0.498006	3266.44	45.2344
419858		20161109	1	47	170.2	84	28.9975	94.7	0.556404	20161109	13.78	0.918	10.44	0.751	-1.9	-0.3	3.3	0.676	-1.2	0.3	1163.9	57.5434	-0.0570098	3.0748	0.98986	2.65811	0.752988	0.0231483	0.553797	54.0196	3.62551	0.653418	0.0208512	0.513092	53.9433	10.3358	0.349842	265.119	22.8659	0.467915	0.00508185	0.324942	261.941	66.989	0.607802	0.00202874	0.232247	1028.36	91.0713
254872	3	41297	2	45	160.1	59.4	23.1741	89.09	0.556465	41297	9.83	0.816	-1.3	0.3	2.7	0.663	-1.3	0.4	1202.07	57.1195	0.53216	4.51779	0.778869	2.30432	0.770564	0.0265123	0.568704	77.9781	3.62567	0.642288	0.0219498	0.525294	77.2513	8.66312	0.780495	0.00744495	0.423312	293.593	13.9726	0.649581	0.00606519	0.589514	585.059	20.6944	0.951255	0.0561776	0.496999	2334.09	32.8692
543521	3	20181127	2	50	159.3	65.9	25.9689	88.7	0.556811	20181127	10.47	0.679	-2.6	-1.8	3.19	0.611	-1.9	-1.3	1249.17	75.9642	1.09081	6.1751	0.574654	2.97995	0.782882	0.0218497	0.556145	112.833	3.10774	0.770796	0.0210096	0.55874	112.481	11.4586	0.792002	0.00649057	0.405365	431.58	11.9522	0.780265	0.00611774	0.404887	430.081	45.7186	0.794165	0.00247451	0.279728	1686.67	47.396
150142481		20161205	1	47	171.1	80.4	27.4635	95.3	0.556984	20161205	15.31	0.997	0.1	0.5	5.52	1.005	1.3	2	1271.3	65.1296	0.581176	4.13144	0.341971	3.72266	0.674458	0.0206091	0.527504	130.971	5.60582	0.501204	0.0177456	0.471777	129.497	14.5539	0.682068	0.00614624	0.379735	502.409	21.8615	0.513954	0.00528463	0.334731	496.556	57.5625	0.686365	0.00239258	0.258742	1964.52	87.2612
180166440	3	20200724	2	48	167.1	76.2	27.2899	93.1	0.557151	20200724	17.54	1.026	0.3	0.6	5.6	0.969	1	1.7	1225.79	53.2037	0.459538	5.06644	0.471167	2.65417	0.6899	0.0278125	0.549326	93.6929	4.37627	0.490106	0.0230723	0.492368	92.523	10.1583	0.698988	0.00751205	0.398951	355.689	17.0722	0.4969	0.00631327	0.343302	351.154	40.1851	0.70135	0.0023845	0.271401	1383.02	67.7496
150153153		20171128	2	48	159.2	60.2	23.7526	88.7	0.557161	20171128	13.32	0.97	0	0.4	4.34	0.957	1.4	1.9	1253.22	61.8331	0.612726	5.64248	0.375488	2.72529	0.743662	0.0234671	0.549208	116.44	3.20894	0.701585	0.0219114	0.534313	115.833	10.4113	0.753754	0.00660513	0.396504	444.164	12.4479	0.708983	0.00620695	0.381572	441.681	41.3241	0.755926	0.00222143	0.267317	1736.07	49.1188
170096229		20180712	1	60	173.9	89	29.43	96.9	0.557217	20180712	14.21	0.849	8.72	0.741	-2	0.3	3.17	0.752	-0.5	2.3	1261.34	69.0974	1.43121	9.589	0.339382	2.50641	0.783903	0.0227277	0.564883	122.719	2.68558	0.77067	0.0217692	0.549566	123.504	9.38736	0.421733	213.065	11.777	0.598181	0.00752665	0.396345	210.571	31.9601	0.724247	0.00245842	0.288586	823.158	46.1474
506616	3	20160321	1	59	173.7	82	27.1778	96.8	0.557283	20160321	12.76	0.909	-0.6	0	4.45	0.8836	-0.1	0.8	1185.59	53.8202	0.099789	2.9827	0.864921	3.23342	0.659862	0.0234237	0.528121	66.3915	4.49342	0.526404	0.0212747	0.492023	65.7747	12.5758	0.662825	0.006715	0.379812	248.112	17.3331	0.534811	0.00614883	0.348491	245.858	49.665	0.665315	0.00227321	0.256115	960.378	68.9079
130174987	3	20141021	1	56	169.9	78.9	27.3332	94.7	0.557387	20141024	15.95	0.888	-0.8	-0.2	4.68	0.822	-0.2	0.7	1179.27	56.6942	0.990076	7.14511	0.970068	3.17626	0.664151	0.0259376	0.540446	61.6962	3.21336	0.646415	0.0256023	0.531361	60.7535	12.443	0.670848	0.00692418	0.38772	231.501	12.6117	0.652939	0.00684839	0.374529	227.866	49.1081	0.67375	0.00220243	0.25909	896.552	50.1294
120034590		20170818	1	59	171.5	91.2	31.0075	95.6	0.557434	20170818	19.89	1.164	13.22	0.923	-0.5	0	3.43	0.682	-1.3	-0.4	1227.58	60.2986	0.524301	3.69166	0.504837	3.1625	0.718128	0.0231891	0.537103	96.3079	3.47924	0.68832	0.0226052	0.518992	95.3289	12.1711	0.338482	301.066	18.6494	0.635942	0.00474129	0.329527	300.253	74.2518	0.63809	0.00178156	0.225873	1170.99	74.0938
170023797	3	20190305	2	56	167.7	75.4	26.8105	93.5	0.557543	20190305	10.89	0.815	-1.3	0	3.23	0.693	-1	0.2	1207.75	53.2023	-0.0301052	2.95096	0.628871	2.09085	0.771959	0.0283083	0.589593	82.0287	2.92796	0.676374	0.0248248	0.544376	81.0385	7.8372	0.784295	0.00772011	0.436676	310.391	11.3046	0.684917	0.00665215	0.394612	306.445	30.689	0.787208	0.00241746	0.303667	1205.93	44.8016
533399	3	20130226	2	49	157.1	61.6	24.9591	87.6	0.557607	20130226	8.2	0.757	-1.8	-0.7	2.63	0.531	-2.5	-1.6	1249.46	54.0512	0.145496	2.8909	0.243614	1.76807	0.807102	0.0296021	0.606964	114.157	2.84444	0.681464	0.0245758	0.545718	111.628	6.67716	0.817017	0.00835072	0.450964	434.367	11.052	0.68873	0.00685202	0.388154	424.326	26.1288	0.820232	0.00253544	0.311586	1695.73	43.4164
280243		20170629	1	54	168.2	87.4	30.893	93.8	0.557669	20170629	18.98	1.23	15.43	1.005	0.2	0.3	3.84	0.791	-0.4	0	1201.95	63.2202	0.143651	3.27569	0.78461	3.24255	0.749113	0.0203101	0.535539	78.3165	4.07158	0.679843	0.0180819	0.49671	77.5187	12.4074	0.381314	637.158	14.2737	0.708832	0.00982696	0.405173	639.161	64.5088	0.682484	0.0058261	0.269673	2503.61	57.2813
190072320	3	43628	2	51	154.9	62.2	25.9231	86.39	0.557715	43628	11.36	0.867	-0.9	-0.1	3.12	0.72	-0.8	-0.1	1302.29	200.157	1.25488	4.56309	1.77668	1.3327	0.968255	0.0996451	0.730508	131.512	2.23718	0.945912	0.0930136	0.711714	129.887	5.12777	0.97066	0.0810986	0.609065	514.23	8.8109	0.948761	0.0760503	0.596163	507.637	20.456	0.971337	0.0756697	0.504179	2035.45	35.5051
391470	3	20160519	2	56	161	69.1	26.6579	89.8	0.557764	20160519	14.09	0.939	-0.3	0.9	4.3	0.797	-0.1	1.3	1209.72	72.2513	1.26769	7.15013	0.854228	3.42009	0.744213	0.0206175	0.535977	82.8793	3.625	0.723794	0.0199377	0.527017	82.8185	13.2613	0.75237	0.00582528	0.383374	313.697	14.1047	0.731867	0.00564876	0.378798	313.498	52.4894	0.755878	0.00194666	0.26503	1220.38	56.2842
150142481	3	20161205	1	47	171	78.7	26.9143	95.4	0.557895	20161205	15.31	0.997	0.1	0.5	5.52	1.005	1.3	2	1271.3	65.1296	0.581176	4.13144	0.341971	3.72266	0.674458	0.0206091	0.527504	130.971	5.60582	0.501204	0.0177456	0.471777	129.497	14.5539	0.682068	0.00614624	0.379735	502.409	21.8615	0.513954	0.00528463	0.334731	496.556	57.5625	0.686365	0.00239258	0.258742	1964.52	87.2612
170023784		20190215	2	57	154.3	60.7	25.4951	86.1	0.558004	20190215	8.39	0.659	-2.7	-1	3.23	0.671	-1.2	0.2	1178.76	62.1858	0.547393	5.53714	0.984184	2.35355	0.794833	0.0241486	0.564395	63.0705	3.366	0.703658	0.0204838	0.522413	62.701	9	0.802994	0.00677849	0.420307	236.536	13.0335	0.711503	0.00566317	0.374579	235.039	35.5074	0.805393	0.00224223	0.286949	915.026	51.7035
140147616		20161124	1	54	169.7	94.7	32.8841	94.7	0.558044	20161124	15.35	1.102	1	1.1	4.49	0.893	0.4	1.2	1237.16	69.0283	0.749574	4.65947	0.571309	3.99425	0.703235	0.0176085	0.502959	103.386	5.1657	0.605485	0.0169043	0.483613	102.301	15.7845	0.70742	0.00510201	0.353258	394.368	20.3559	0.610944	0.0048757	0.345439	389.958	63.0345	0.709246	0.00181105	0.233796	1541.14	81.1857
431433	3	20180112	1	65	169.1	76.3	26.6832	94.4	0.55825	20180112	14.24	0.92	-0.5	0.1	4.24	0.773	-0.6	0.4	1250.05	58.0868	0.223095	3.50454	0.326149	3.457	0.670647	0.0216029	0.517078	113.873	4.88272	0.524911	0.0192631	0.485258	113.296	13.524	0.677418	0.00595385	0.366629	434.362	19.2901	0.530638	0.00527892	0.336563	431.956	53.6597	0.680551	0.00198613	0.24441	1694.08	76.5037
180047873		20191128	1	56	170.4	83.7	28.8261	95.2	0.558685	20191128	13.22	0.923	12.72	0.859	-1.1	-1	4.49	0.912	0.5	0.7	1215.76	46.6481	0.2428	3.74308	0.451574	3.22024	0.541462	0.0284687	0.534992	85.797	3.27311	0.524275	0.0285902	0.534216	85.0984	12.3214	0.385807	366.044	13.4285	0.696084	0.00641597	0.375201	362.151	48.1961	0.729636	0.00210959	0.260775	1426.44	53.3698
103890	3	43924	1	59	173.9	84.5	27.942	97.16	0.558712	43915	13.87	0.79	-1.6	-0.8	3.49	0.654	-1.5	-0.6	1147.06	100.464	1.60276	6.22627	1.05435	1.25928	0.951868	0.0324837	0.692117	50.8733	2.73383	0.893889	0.0267653	0.634252	50.4953	4.62666	0.956242	0.00988539	0.544244	191.777	10.6853	0.897114	0.00801905	0.476622	190.131	18.0046	0.957687	0.00366832	0.401877	743.844	42.9313
140073560	3	20160616	2	35	159.1	69.8	27.575	88.9	0.558768	20160616	12.31	0.89	-0.7	-0.6	3.03	0.637	-1.5	-1.2	1222.79	58.3937	1.13661	7.7852	0.523195	1.6194	0.828271	0.033624	0.623057	92.4067	2.48639	0.725345	0.0296706	0.578635	90.9921	6.0346	0.839073	0.00955257	0.467035	350.383	9.40193	0.738535	0.00839671	0.427851	344.751	23.8395	0.841225	0.00287468	0.330101	1365.01	37.2925
444449	3	20200709	2	67	165.9	70.9	25.7605	92.7	0.55877	20200709	8.05	0.682	-2.5	-0.4	3.11	0.612	-1.8	0.2	1141.47	59.337	0.722184	4.82313	0.973138	3.24802	0.702941	0.023128	0.54158	41.9934	2.69103	0.75571	0.0244019	0.553442	42.0346	12.6488	0.707414	0.00647203	0.393227	155.25	10.4478	0.760167	0.00684275	0.400484	155.443	50.0284	0.709375	0.00216259	0.26718	595.476	41.198
130141062		20161122	1	48	172.1	86	29.036	96.2	0.558977	20161122	15.25	0.957	14.24	0.962	-0.2	0.2	3.82	0.741	-0.8	0	1188.16	55.9388	0.356601	3.90433	0.880409	2.70024	0.727294	0.0257036	0.566841	68.4481	3.76989	0.618594	0.0218311	0.506255	67.9492	10.384	0.354667	289.198	19.2142	0.51015	0.00543304	0.342092	285.902	58.5717	0.629041	0.00197542	0.237671	1122.03	76.4733
457212	2	42544	2	67	147.2	52.6	24.2756	82.29	0.559035	42544	7.69	0.805	-1.4	0.4	2.53	0.622	-1.7	0.3	1267.63	146.041	1.77899	7.69918	1.30641	1.24167	0.954981	0.0391628	0.695	116.833	1.35581	0.949633	0.0354687	0.669201	115.428	4.5875	0.959913	0.0240239	0.561467	451.719	5.20086	0.953242	0.0217966	0.529113	445.849	18.0333	0.961094	0.0188079	0.428979	1776	20.7446
557327	3	20160503	1	36	178.2	86	27.0821	99.7	0.559484	20160503	10.53	0.835	-1.2	0.1	2.92	0.706	-0.9	0.4	1199.4	43.4549	0.520768	3.91449	0.594107	1.72444	0.720414	0.0395066	0.60211	74.5688	1.82135	0.693193	0.0399289	0.599427	73.3807	6.45823	0.732913	0.0111418	0.447108	280.7	6.8526	0.705444	0.0110227	0.436838	276.06	25.3555	0.736732	0.00324318	0.310619	1089.42	26.9302
150068471		20170616	2	45	156.7	61.1	24.883	87.7	0.559668	20170616	10.86	0.93	-0.3	-0.1	3.55	0.0761	-0.4	-0.1	1256.02	75.0565	0.156253	3.51538	0.571682	3.51102	0.780604	0.0173148	0.526194	121.323	4.81127	0.687468	0.0151878	0.487032	120.055	13.7404	0.786583	0.00545706	0.377624	463.962	19.0425	0.692385	0.00465499	0.343937	458.723	54.7029	0.788693	0.00234769	0.256415	1815.96	75.9992
120043251	3	20160614	1	80	169.9	75.9	26.2939	95.1	0.559741	20160609	7.46	0.569	-2.6	-1.7	2.48	0.444	-4.2	-1.9	1099.39	42.8588	1.19203	5.75578	0.4641	0.741758	0.873579	0.0691788	0.727793	22.781	0.677647	0.882766	0.0744151	0.740471	22.3627	2.43603	0.893548	0.0200105	0.575407	81.9152	2.25059	0.900773	0.02111	0.583253	80.2984	9.35479	0.898095	0.00545785	0.416118	310.318	8.67765
150167110		20191206	2	46	163.6	71.6	26.7514	91.6	0.559902	20191206	12.75	0.866	-0.9	-0.5	2.98	0.644	-1.5	-1	1179.08	44.2515	0.551463	4.18047	0.895088	1.37727	0.781565	0.0452169	0.645549	61.4267	2.06724	0.662763	0.0384085	0.584763	60.7128	4.99375	0.798627	0.0125484	0.489835	229.859	7.85014	0.673861	0.0104782	0.426909	226.989	19.4716	0.802273	0.0035931	0.344743	889.949	30.9664
130146368	3	20180724	2	73	157.7	69.6	27.9863	88.3	0.559924	20180724	9.66	0.705	-2.3	0	2.97	0.656	-1.4	1.1	1103.73	60.398	0.401441	3.82316	0.70012	3.06939	0.715776	0.0222861	0.544742	26.0245	4.3249	0.595526	0.0192679	0.493861	25.3618	12.1585	0.721472	0.00644176	0.38738	94.2714	17.1724	0.601872	0.00547757	0.349486	91.6211	48.3558	0.724711	0.00230737	0.265114	358.367	68.7579
160168743		20190609	1	56	169.1	91.5	31.9988	94.7	0.560024	20190527	7.83	0.614	-1.8	-1.4	2.97	0.562	-2.9	-1.7	1090.28	58.6965	0.441874	3.74263	0.536843	3.40915	0.651458	0.0248669	0.540552	21.039	4.04274	0.587632	0.0232139	0.512549	20.4353	13.4323	0.657817	0.00723528	0.385277	75.0848	15.7607	0.600281	0.00671774	0.36986	72.87	53.8201	0.65952	0.00281826	0.263098	283.432	63.3297
411833	3	43139	2	60	151.6	52.8	22.9739	84.92	0.560158	43139	16.42	0.918	-0.6	-0.1	4.13	0.797	-0.4	0.3	1231.97	144.627	1.00512	4.21822	1.42603	0.883312	0.978761	0.041182	0.74423	103.369	1.33681	0.967134	0.0360379	0.68886	101.428	3.17761	0.981414	0.0236635	0.608063	399.655	5.02648	0.969844	0.0206792	0.554126	402.98	17.1	0.977827	0.024289	0.465482	1618.24	24.942
422523		20170724	1	81	169.7	85.5	29.6895	95.1	0.560401	20170724	17.44	1.11	20.34	1.18	1.6	1.6	4.45	0.809	-0.3	0.7	1184.14	102.565	1.31151	6.65568	1.21002	4.17256	0.831684	0.0151143	0.523814	69.6074	3.90009	0.842609	0.0152972	0.532144	69.9631	16.333	0.372471	179.761	18.246	0.763052	0.00425589	0.357698	176.763	60.3104	0.810789	0.00168406	0.253363	694.45	72.8351
120118050	3	20161201	1	55	173	80.8	26.9972	97	0.560694	20161201	14.89	0.955	-0.2	0.2	3.99	0.755	-0.7	0.1	1217.73	69.8178	0.65675	4.72078	0.7616	4.49537	0.683151	0.0162609	0.490628	88.6875	4.85483	0.650673	0.015837	0.479789	87.7629	17.6944	0.689139	0.00472489	0.342109	337.191	19.0069	0.658936	0.00459683	0.339482	333.615	70.5648	0.690335	0.00178969	0.225321	1314.33	75.7019
241672	3	43917	2	69	155.2	54.3	22.5432	87.03	0.56076	43917	9.25	0.709	-2.3	-0.5	3.13	0.673	-1.2	0.4	1278.47	177.104	0.968394	3.43809	1.57411	1.1629	0.969832	0.0637322	0.750965	121.658	2.11694	0.943323	0.0530186	0.695952	119.272	4.31075	0.973253	0.0465707	0.621644	472.374	8.3224	0.94649	0.0387178	0.562874	276.712	23.3195	0.972922	0.0271156	0.49638	1145.98	53.244
495491	3	20160425	1	47	170.8	76.4	26.1889	95.8	0.56089	20160425	9.94	0.763	-1.9	-1.1	3.87	0.708	-1.1	-0.4	1174.27	69.1108	0.280232	3.32579	1.00977	6.17628	0.584513	0.0144002	0.450109	59.9936	8.44108	0.433188	0.0128245	0.408392	58.5459	24.0107	0.595462	0.00453603	0.307617	226.37	33.52	0.435818	0.00403798	0.280742	220.396	96.187	0.596448	0.00194499	0.203266	877.198	134.186
351763		20181012	2	42	164	78.4	29.1493	92	0.560976	20181012	10.78	0.884	10.17	0.71	-2.2	-0.8	2.57	0.531	-2.5	-1.4	1160.54	47.3726	0.521745	6.03519	1.01384	1.55556	0.779053	0.0406204	0.622477	51.0232	1.62006	0.770259	0.0405705	0.624308	50.7994	5.66272	0.471323	434.853	8.87115	0.736794	0.00876118	0.410029	432.664	24.0846	0.828483	0.0030708	0.329273	1696.43	35.1502
130159232	3	20151002	1	37	176.1	84.9	27.3772	98.8	0.561045	20151002	13.74	0.89	-0.8	-0.5	4.24	0.809	-0.3	0.1	1220.58	63.5706	0.159927	4.13441	0.573855	3.42344	0.72875	0.0216162	0.524281	91.5789	4.11532	0.66557	0.0203313	0.499985	91.1604	13.1316	0.736146	0.00609318	0.374116	346.9	15.8294	0.673852	0.00598256	0.357816	345.297	51.9115	0.737772	0.00207327	0.250451	1349.51	62.7447
539807		20190918	1	74	167.9	90.3	32.0322	94.2	0.561048	20190919	8.06	0.691	-2.4	-0.5	2.91	0.677	-1.2	0.7	1187.67	54.3874	0.952207	4.68359	0.907555	1.76707	0.805777	0.0343427	0.612262	67.9762	2.12256	0.767646	0.0321475	0.582069	67.3433	6.7311	0.812761	0.00939917	0.453912	255.428	8.16707	0.773639	0.00889798	0.424552	252.857	26.586	0.814842	0.00279075	0.31494	989.852	32.0579
507694	3	20161216	2	56	159.6	63	24.7329	89.6	0.561404	20161216	8.87	0.702	-2.3	-0.8	2.39	0.518	-2.7	-1.4	1141.55	61.782	0.425841	4.10085	0.956932	4.01786	0.666084	0.0191653	0.50513	42.575	5.53228	0.53296	0.0179587	0.466328	41.3572	15.4179	0.676599	0.00554898	0.357938	156.996	21.4347	0.542724	0.00521295	0.327445	152.273	61.0307	0.678804	0.00195204	0.23856	603.56	84.9835
160061248	3	43276	2	77	145	45	21.4031	81.43	0.561586	43262	4.17	0.546	-3.4	-1	2.46	0.485	-3.4	-0.5	1106.63	159.452	2.37387	9.58699	0.957699	0.814987	0.978221	0.0926808	0.780168	38.6472	1.86523	0.948425	0.0916669	0.723554	36.1974	2.99668	0.980714	0.0536414	0.648625	147.174	7.39555	0.950756	0.0518496	0.602346	137.493	11.6711	0.981559	0.0395882	0.531356	575.139	29.7527
103890	3	43494	1	58	173.9	84.5	27.942	97.66	0.561587	43494	14.78	0.815	-0.7	-0.4	3.92	0.688	-1.5	-0.5	1165.98	102.987	1.44782	5.43448	1.19332	1.23771	0.952523	0.0300781	0.687302	60.2626	2.51223	0.899914	0.026238	0.628638	58.5258	4.6229	0.956589	0.00973733	0.527009	228.446	9.92255	0.903123	0.00785034	0.471685	221.461	18.0613	0.957923	0.00410253	0.386345	890.114	39.7908
160056790	3	42893	2	35	157.7	70.9	28.5091	88.57	0.561636	42893	12.31	1.018	9.79	0.731	-2.1	-1.3	3.82	0.708	-1.1	-0.4	1163.75	72.785	0.356996	3.73447	1.03149	8.53378	0.468414	0.0124892	0.420274	53.5887	7.49406	0.536662	0.0126326	0.424649	53.8752	34.3176	0.609764	557.795	5.79671	0.947507	0.0410161	0.571436	551.344	14	0.969342	0.0417177	0.481768	2199.82	23.3506
130162300	3	20161130	1	59	177.5	85.1	27.0105	99.7	0.56169	20161130	14.69	0.964	-0.2	0.3	4.62	0.854	0.1	1	1199.82	64.407	0.196833	3.11083	0.812275	6.77163	0.492038	0.0149354	0.441821	75.5497	5.40645	0.590135	0.0160497	0.468103	75.9911	26.633	0.494302	0.00438394	0.303252	285.212	21.1274	0.595046	0.00467352	0.330523	287.08	105.7	0.49464	0.00163081	0.199835	1108.1	83.5129
130081795		20181114	1	36	174.1	87.9	28.9996	97.8	0.561746	20181114	12.36	0.75	11.68	0.829	-1.2	-0.7	2.78	0.539	-2.5	-1.9	1144.47	130.274	2.21812	9.00906	1.0934	1.22244	0.961468	0.0322008	0.699993	50.0068	1.87897	0.940064	0.0306142	0.664564	48.2599	4.5639	0.389998	382.001	15.6313	0.608534	0.00623459	0.359727	377.014	41.3858	0.754744	0.00223535	0.265196	1489.85	62.0959
553354	3	43643	1	67	156.2	60.8	24.9196	87.82	0.562228	43643	8.92	0.735	-2	0	2.58	0.562	-2.3	-0.4	1146.16	153.772	1.7289	6.83701	1.2344	1.35862	0.969304	0.0542532	0.725487	56.9143	3.19048	0.925871	0.0501779	0.676813	54.9008	5.2266	0.971335	0.0275814	0.589571	217.917	12.7778	0.927982	0.0261401	0.545352	209.882	20.8039	0.971954	0.0197578	0.472475	853.208	51.8413
269038		20170321	2	40	167	74.1	26.5696	93.9	0.562275	20170321	10.59	0.878	-0.8	-0.6	3.87	0.8	0	0.4	1272.32	62.209	-0.432291	6.02948	0.360524	1.7208	0.848194	0.0329864	0.615864	134.026	1.76577	0.836642	0.0336144	0.615948	133.945	6.43196	0.857495	0.00922729	0.456019	513.525	6.69691	0.844375	0.00947942	0.456752	513.13	25.3331	0.859951	0.00290686	0.316565	2009.67	26.3719
160090183		20200605	1	50	168.4	75.9	26.7644	94.7	0.562352	20200605	15.04	0.964	-0.2	0.2	4.24	0.8	-0.4	0.4	1211.44	54.8274	-0.154259	2.96681	0.642527	3.41612	0.646238	0.0232738	0.529248	84.0312	4.44665	0.536469	0.0205893	0.494158	82.5873	13.0403	0.659153	0.00664793	0.382553	318.297	17.3218	0.544714	0.00588979	0.351595	312.419	51.8331	0.660577	0.00230074	0.256332	1235.38	69.0356
535352	3	20190813	1	82	182.9	91.1	27.2327	102.9	0.562603	20190813	13.46	0.901	-0.7	-0.2	4.03	0.761	-0.7	0	1072.81	55.8643	0.456764	3.83496	0.375365	2.8155	0.666522	0.034765	0.569958	15.489	2.62745	0.682206	0.0355249	0.576773	15.3273	11.116	0.678944	0.011679	0.418418	54.5905	10.3419	0.694828	0.0116824	0.425367	53.9568	44.5925	0.681672	0.00496	0.293016	204.501	41.547
120159666		20180710	1	61	175.6	97.5	31.6195	98.8	0.562642	20180710	15.98	1.07	0.7	1	4.37	0.903	0.5	1.4	1271.63	84.0229	0.537956	3.94544	0.678304	3.4152	0.807787	0.0196813	0.552419	132.839	3.32432	0.811455	0.019953	0.557581	132.613	13.2269	0.816889	0.00770835	0.406545	510.342	12.9318	0.819331	0.00771333	0.418647	509.238	52.655	0.819775	0.00393694	0.284943	1999.96	51.3637
150062176		20190510	1	59	170.6	78.2	26.8688	96	0.56272	20190510	16.27	0.877	-0.9	-0.2	4.15	0.764	-0.7	0.3	1169.84	52.1447	0.195053	3.43654	0.97708	2.46617	0.720697	0.027717	0.565144	56.4825	4.09881	0.531212	0.0227697	0.50178	55.4442	9.21284	0.733706	0.0076859	0.412652	211.021	15.6843	0.541967	0.00633895	0.359711	206.974	36.6109	0.735817	0.00227843	0.276274	815.868	62.7297
140171831		20170629	1	45	178.4	83.1	26.1103	100.4	0.56278	20170629	11.84	0.757	-1.9	-1.2	3.81	0.74	-0.9	-0.2	1191.18	70.4324	0.0276926	3.11724	0.900887	4.66721	0.702956	0.0147058	0.48492	72.4699	4.8413	0.686831	0.0144494	0.471786	71.988	18.4358	0.706684	0.00407488	0.341631	273.136	19.1429	0.690486	0.00403887	0.327838	271.292	73.0656	0.709698	0.00145152	0.226949	1060.22	76.4571
180005378	3	20190604	2	53	159.2	64.5	25.4492	89.6	0.562814	20190604	9.65	0.697	-2.4	-1.1	3.06	0.663	-1.3	-0.3	1212.08	69.0525	0.455816	3.66151	0.796824	2.92911	0.797047	0.0184838	0.548425	86.7121	2.86811	0.801594	0.0185321	0.544816	86.1141	11.2642	0.803748	0.00516002	0.389817	327.886	10.9773	0.809281	0.00522133	0.39241	325.655	44.3292	0.806803	0.00172597	0.25921	1276.23	43.5551
130067010		20160811	1	55	178.9	92.6	28.9328	100.7	0.562884	20160811	20.86	1.107	13.02	0.905	-0.7	-0.2	3.99	0.82	-0.2	0.5	1110.83	71.625	1.09968	6.06813	0.7722	3.75152	0.746773	0.0202812	0.537708	30.0379	4.28582	0.707967	0.0191525	0.512246	29.3498	14.628	0.314979	316.648	40.515	0.396197	0.00328813	0.266637	306.346	93.7569	0.658702	0.00148727	0.205686	1231.32	162.311
225329		20150522	2	50	159.8	64.5	25.2584	90	0.563204	20150522	11.48	0.948	-0.2	0.3	3.47	0.774	-0.3	0.4	1243.79	74.793	-0.0678554	3.17591	0.620027	4.44874	0.740781	0.0147518	0.491011	111.702	3.90067	0.765614	0.0158544	0.511998	111.765	17.2756	0.749092	0.00450109	0.348863	426.017	15.17	0.77282	0.00472316	0.367437	426.19	68.9109	0.750895	0.00179366	0.236823	1664.02	60.7197
140130885		20181207	1	37	168.1	88.5	31.319	94.7	0.563355	20181207	14.49	0.938	-0.4	-0.2	3.9	0.776	-0.6	-0.2	1230.37	78.0284	0.581781	4.21847	0.771206	5.5	0.678556	0.0135495	0.477769	99.0849	6.64983	0.608815	0.0126232	0.451983	97.7017	21.768	0.682164	0.00407236	0.334586	378.003	26.3158	0.613193	0.00375789	0.315742	372.534	87.2079	0.68316	0.00159159	0.223575	1474.35	105.031
130172484		20191218	1	58	174.8	97.4	31.8769	98.5	0.563501	20191218	15.51	1.056	0.6	0.9	4.94	1.02	1.4	2.3	1276.83	87.8858	2.0797	13.5238	0.514887	2.91849	0.76836	0.0253485	0.552916	131.72	3.84813	0.676259	0.0235271	0.535078	130.787	11.4069	0.778866	0.00898588	0.409999	505.553	15.2574	0.686704	0.00761848	0.391292	501.602	45.1772	0.783248	0.00485218	0.295654	1981.96	61.0328
381654	3	20140502	2	56	167.7	72.1	25.6371	94.5	0.563506	20140502	10.65	0.816	-1.3	0	2.67	0.542	-2.4	-1.2	1189.29	65.0392	0.243724	3.2662	0.903249	3.47869	0.738543	0.0192508	0.524438	70.7195	3.37993	0.750701	0.0195511	0.531335	70.6509	13.5327	0.744352	0.00541447	0.372178	266.593	13.1649	0.755923	0.00554618	0.385334	266.353	53.2848	0.747272	0.00191782	0.245786	1032.16	51.9254
190056524		20200623	2	62	155.1	62.2	25.8563	87.4	0.563507	20200623	10.2	0.81	-1.4	0.3	3.95	0.868	0.6	2.6	1214.56	86.0778	0.584119	3.75887	0.971489	4.54382	0.779526	0.0143617	0.506339	89.5455	4.7722	0.765141	0.0142359	0.491084	89.1176	18.0393	0.783747	0.00451088	0.359972	341.263	19.0518	0.76833	0.00454467	0.352111	339.541	72.38	0.784922	0.00201564	0.247904	1332.42	76.5066
547354	3	20150611	1	43	176.7	88.6	28.3766	99.6	0.563667	20150611	16.92	1.01	9.2	0.835	-1.2	-0.6	2.67	0.611	-1.8	-1.2	1244.95	65.4061	1.17058	6.82068	0.406304	2.62245	0.761581	0.025102	0.569428	108.527	3.62061	0.670752	0.0213458	0.519386	108.378	10.3073	0.407654	188.123	11.71	0.616276	0.00759311	0.380024	186.542	41.2872	0.661316	0.00242335	0.281721	725.386	46.4572
216920		20170929	2	45	164.8	74	27.2469	92.9	0.563714	20170929	12.46	0.901	-0.6	-0.3	3.17	0.662	-1.3	-0.8	1215.24	48.5762	0.000669452	3.22632	0.504798	1.93929	0.74829	0.0322945	0.595605	86.7357	2.51342	0.665562	0.0293682	0.562443	86.2171	7.11964	0.763838	0.00891865	0.443864	327.707	9.34109	0.681981	0.00818645	0.417938	325.682	28	0.766356	0.00268707	0.308683	1273.63	36.6452
476477	3	20141215	2	51	168.8	73.9	25.9358	95.2	0.563981	20141215	12.78	0.951	-0.1	0.5	3.19	0.721	-0.8	0	1265.12	54.9341	0.234975	3.16097	0.148797	1.89588	0.799299	0.0295807	0.599685	127.152	2.15699	0.768868	0.0283656	0.586061	126.803	7.14302	0.810567	0.00825134	0.436107	485.931	8.24267	0.778427	0.00774473	0.424477	484.554	28.1327	0.813694	0.00257372	0.303308	1901.18	32.6095
541936		20161020	2	82	164.7	72.7	26.8008	92.9	0.564056	20161012	11.47	0.843	-1.1	-0.3	3.56	0.67	-1.2	-0.5	1226.58	135.899	0.950734	3.03101	1.42419	2.00942	0.947319	0.0380056	0.669371	101.047	1.73944	0.954658	0.0386914	0.667483	100.916	7.88415	0.94977	0.0221133	0.528936	390.757	6.67667	0.957722	0.0231895	0.527816	390.351	31.8027	0.950092	0.0172068	0.407892	1537.09	26.57
543896	3	20120719	1	52	171.5	84.2	28.6275	96.8	0.564431	20120719	10.96	0.711	10.75	0.739	-1.3	-0.7	3.56	0.738	-1	0.6	1157.82	117.225	1.8994	8.85762	1.19296	1.60385	0.940929	0.0243935	0.66524	54.6135	1.71415	0.939242	0.0225875	0.647122	56.84	6.15865	0.406211	239.693	11.3492	0.705713	0.00701557	0.394283	237.103	42.8605	0.724745	0.00230126	0.279064	928.102	44.7708
120140031	3	20140721	1	31	171.1	73.9	25.2432	96.6	0.564582	20140723	13.81	0.955	-0.3	-0.2	4.76	0.855	0.1	0.3	1310.28	64.56	0.314664	4.28226	0.379488	4.29331	0.568969	0.0243112	0.523483	164.986	3.85	0.59665	0.0246555	0.529453	164.911	17.1407	0.582786	0.00827558	0.380213	637.69	15.5006	0.606027	0.00795859	0.386982	637.101	68.7874	0.585719	0.0040758	0.267163	2504.39	62.3356
130034849	3	20170324	2	53	160.8	67.3	26.0281	90.8	0.564677	20170324	9.17	0.763	-1.8	-0.7	3.03	0.612	-1.8	-0.9	1189.84	54.8362	0.52654	4.18083	0.873063	1.98681	0.788213	0.0313619	0.598798	69.8063	3.26481	0.648839	0.0251352	0.531517	68.7895	7.39028	0.800134	0.00870467	0.444477	262.188	12.499	0.658761	0.00692154	0.37928	258.21	29.0972	0.803202	0.00276235	0.306338	1015.12	49.653
150118813	3	20170602	2	48	163.6	72.1	26.9382	92.4	0.564792	20170602	10.09	0.821	-1.3	-0.7	3.53	0.715	-0.8	-0.3	1239.64	59.7135	0.0535761	4.29689	0.452112	3.38739	0.686813	0.0228317	0.530822	105.682	3.42521	0.674576	0.0221693	0.520128	105.126	12.9697	0.694171	0.00682579	0.387718	402.775	13.237	0.679637	0.00650519	0.367266	400.569	51.1303	0.697745	0.00232187	0.262261	1572.06	52.2235
120125496	3	20181129	2	53	156.1	62.4	25.6082	88.2	0.565022	20181129	14.41	1.055	0.8	1.4	3.55	0.784	-0.2	0.8	1285.36	55.1727	-0.0428863	2.99647	0.158648	1.87738	0.803779	0.0284609	0.600337	145.793	2.93441	0.685618	0.023573	0.540992	144.722	7.00298	0.815616	0.00785785	0.44479	559.967	11.2856	0.695452	0.00660129	0.391287	555.776	27.5643	0.818545	0.00248795	0.310335	2195.75	44.4472
120029550	3	20151103	2	42	161.7	66.6	25.4715	91.4	0.565244	20151103	14.05	0.987	0.2	0.3	3.42	0.787	-0.1	0.3	1301.17	53.6657	0.0361742	4.05756	0.244451	1.53274	0.812317	0.0355137	0.6262	158.92	1.99284	0.745769	0.0321787	0.597814	158.986	5.74167	0.824682	0.0102516	0.470871	611.568	7.59988	0.758169	0.00919416	0.442689	611.63	22.4821	0.828543	0.00360544	0.333217	2397.8	29.8038
536897	3	20161031	1	70	176.7	85.8	27.4798	99.9	0.565365	20161031	10.68	0.932	-0.3	0.9	3.38	0.767	-0.3	1.2	1171.29	75.1815	0.435093	3.35817	1.03512	5.44418	0.689838	0.0135259	0.466953	60.8942	4.96217	0.71584	0.0137897	0.48442	60.4905	21.5429	0.692069	0.00385597	0.324973	228.151	19.497	0.719965	0.00393103	0.338047	226.612	85.53	0.694369	0.00141259	0.214259	883.66	77.6034
547354	3	20180921	1	46	176.7	88.6	28.3766	99.9	0.565365	20180921	8.12	0.633	11.81	0.881	-0.9	-0.3	3.32	0.708	-1.1	-0.4	1210.94	66.2718	0.240144	3.25452	0.748066	3.48465	0.748107	0.0188325	0.527176	85.1861	3.24178	0.759068	0.0191865	0.5226	84.9001	13.4143	0.387286	178.188	11.9771	0.610794	0.00756662	0.388474	177.7	43.6522	0.638794	0.0024108	0.264046	684.356	47.2984
538426		20171023	2	57	166.4	76.2	27.52	94.1	0.565505	20171023	7.88	0.691	-2.4	-0.9	3.14	0.719	-0.8	0.5	1183.2	54.5408	0.144906	2.94559	0.898772	2.1526	0.77497	0.0271117	0.571385	65.0656	2.48301	0.738845	0.0256534	0.563906	64.9817	8.00909	0.787122	0.0075974	0.416008	244.609	9.29085	0.75158	0.00710752	0.411133	244.208	31.8539	0.788745	0.00236802	0.278558	945.764	36.6124
140162060	3	20151204	2	38	154.7	63.6	26.5752	87.5	0.565611	20151204	12.76	1.003	0.3	0.4	3.16	0.743	-0.6	-0.2	1306.01	71.4431	0.429431	5.52222	0.438263	2.50542	0.788288	0.0286666	0.585806	162.717	3.33036	0.71113	0.0245851	0.551705	161.389	9.74384	0.799301	0.0110646	0.435833	627.376	13.2907	0.719604	0.00911754	0.406374	621.845	38.8906	0.800806	0.00480575	0.301986	2462.59	52.9405
417402	1.3	20191202	1	45	178.7	90	28.1834	101.1	0.565753	20191202	14.35	0.923	3.78	0.551	-3.4	-1.1	1.57	0.356	-4.8	-2.1	1113.28	37.4235	2.32999	15.1012	0.437035	0.612245	0.86108	0.104876	0.758553	27.1722	0.699615	0.834063	0.100097	0.745764	26.7373	1.96471	0.326065	325.652	31.5374	0.566961	0.00338933	0.295851	319.177	92.9885	0.687065	0.00144682	0.21333	1269.51	125.724
536655		20180213	2	72	160.3	70.8	27.5528	90.7	0.565814	20180213	8.51	0.701	-2.1	0	2.35	0.511	-3.1	-0.3	1141.87	65.5641	0.437409	4.60876	0.995967	3.2152	0.748137	0.0208308	0.533987	43.3526	5.04907	0.59981	0.0174674	0.488921	42.4111	12.4973	0.754501	0.00605134	0.388338	160.241	19.8009	0.60515	0.00528635	0.347081	156.476	49.7683	0.757124	0.00227596	0.262304	618.197	79.7056
506573		20200717	1	66	168.6	97	34.1237	95.4	0.565836	20200717	15.11	1.065	0.7	0.9	4.99	0.871	0.2	1.3	1226.26	175.848	2.16386	8.72957	1.43829	7.91852	0.750283	0.0139095	0.475663	84.5009	7.7959	0.753999	0.0142071	0.46364	84.8015	32.0954	0.753417	0.00830761	0.345528	323.932	31.3122	0.759563	0.00881329	0.341166	325.327	128.335	0.756314	0.00688272	0.254841	1266.62	124.828
130173302	3	20161109	1	45	174.6	82.5	27.0623	98.8	0.565865	20161109	13.67	0.897	-0.9	-0.4	4.8	0.78	-0.5	0.1	1196.23	61.4085	0.706668	4.75494	0.882656	3.91463	0.653975	0.0200342	0.514785	73.1775	3.79116	0.660022	0.0202138	0.508596	72.5728	15.0874	0.664946	0.00565232	0.380538	275.73	14.6469	0.669965	0.00563469	0.363681	273.31	59.628	0.669171	0.0020417	0.259351	1070.37	58.0612
130034768	3	20130313	2	35	158.7	66.7	26.4833	89.9	0.566478	20130313	13.13	1.062	0.8	0.9	3.6	0.738	-0.6	-0.2	1331.51	66.9208	0.614336	3.49025	0.519641	2.03446	0.750303	0.0496252	0.616656	183.004	2.30206	0.716447	0.0453015	0.609393	181.713	7.98371	0.766857	0.024663	0.471844	709.675	9.1651	0.730763	0.0214279	0.468447	704.12	31.8684	0.772852	0.0162075	0.352486	2795.07	36.9431
130036119	3	20170324	2	52	160.6	69	26.7521	91	0.566625	20170324	7.93	0.764	-1.8	-0.8	2.98	0.659	-1.3	-0.6	1204.68	61.1725	0.524924	4.32786	0.80308	2.58768	0.770894	0.0239235	0.572031	80.1829	3.19634	0.71544	0.0211498	0.525084	79.6263	9.88498	0.780188	0.00661365	0.423612	302.802	12.3681	0.723746	0.00588428	0.373141	300.545	39.0258	0.783614	0.00217874	0.289803	1177.9	49.31
140086625	3	20170725	2	54	159.7	65	25.4861	90.5	0.566688	20170725	9.66	0.736	-2	-0.7	2.59	0.546	-2.4	-1.4	1189.72	65.3763	0.209701	3.08603	0.901207	2.30214	0.832124	0.0220624	0.57831	71.4479	3.38519	0.75017	0.0186317	0.522799	70.6545	8.8135	0.838532	0.00622426	0.424801	269.478	12.9798	0.759218	0.00529062	0.378486	266.404	34.7968	0.840289	0.00205629	0.289172	1045.72	51.1037
463315		20160419	2	42	158.4	58	23.1163	89.8	0.566919	20160419	9.94	0.728	-2.1	-0.4	3.34	0.706	-0.9	0.7	1143.62	68.3073	1.07439	6.64137	1.01329	2.50921	0.814287	0.0239111	0.578518	44.4883	2.974	0.77956	0.022685	0.55855	44.07	9.63464	0.821444	0.00660517	0.425667	165.33	11.51	0.786546	0.0062465	0.437531	566.974	27.6357	0.811727	0.00326807	0.32067	2236.91	33.1751
160020593		20200603	1	50	177.8	93.8	29.6715	100.8	0.566929	20200526	12.07	0.755	15.45	0.953	-0.3	0.2	3.4	0.661	-1.5	-0.6	1204.59	59.4502	0.400988	4.38762	0.754092	3.70419	0.659646	0.0212617	0.524956	79.3674	4.68581	0.570395	0.0192495	0.484105	78.5168	14.2651	0.478223	184.311	4.37668	0.724624	0.0178551	0.51017	184.031	20.3933	0.682032	0.00466166	0.339837	709.688	16.9505
130044253	3	20130329	1	45	156.4	62.6	25.5918	88.7	0.567136	20130329	12.6	0.96	-0.1	0.1	4.13	0.866	0.6	1	1285.29	51.4351	0.60188	3.62643	0.163532	1.08369	0.854282	0.0413297	0.672485	144.011	1.99087	0.728202	0.0312227	0.587772	142.362	3.9407	0.8679	0.0117556	0.508629	552.653	7.52596	0.743077	0.00865107	0.432274	545.915	15.2176	0.873395	0.00375799	0.365182	2166.18	29.7894
535374		20160729	1	80	171.3	90.6	30.8755	97.2	0.567426	20160729	15.43	1.007	13.9	0.935	-0.4	0	4.12	0.707	-1.1	-0.4	1250.9	55.0482	0.227451	4.21323	0.283831	2.24815	0.753257	0.0299544	0.583675	114.75	3.19406	0.651861	0.026126	0.538374	113.786	8.48201	0.52392	192.629	3.17224	0.749714	0.0208729	0.531826	192.58	13.2811	0.742957	0.00545	0.374187	742.742	12.2536
130168744		20200130	2	59	167.4	75.4	26.9067	95	0.567503	20200225	10.4	0.766	-1.5	-0.1	3.52	0.745	-0.5	1.1	1177.67	48.5418	0.510622	3.80402	0.932887	1.95277	0.738636	0.0344831	0.598234	60.9157	2.84865	0.621582	0.0301087	0.555148	60.2331	7.21795	0.754616	0.00950679	0.435946	228.43	10.8595	0.633878	0.00813367	0.396451	225.59	28.6032	0.756789	0.00294674	0.305013	883.968	42.7703
130130015	3	20170918	2	58	158.4	62.7	24.9895	89.9	0.567551	20170918	7.68	0.64	-2.8	-1.1	2.99	0.642	-1.5	0	1154.64	59.1441	0.544228	3.19438	0.991592	1.65167	0.853555	0.0283802	0.615713	50.0717	1.89468	0.830602	0.027605	0.597964	49.6336	6.04111	0.864192	0.00773395	0.456978	186.503	7.08149	0.839501	0.00761673	0.443653	184.771	23.9111	0.865489	0.00240617	0.316106	719.367	27.8836
130032304	3	20130308	2	35	164.5	70.6	26.0899	93.4	0.567781	20130308	11.42	1.002	0.3	0.4	3.44	0.84	0.3	0.7	1350.63	70.4546	0.633791	4.90471	0.670375	1.30352	0.818261	0.0767511	0.697324	198.707	2.13649	0.677041	0.0665513	0.648452	198.28	4.93564	0.836042	0.0383397	0.554088	772.507	8.55946	0.69267	0.0336824	0.510348	770.398	19.6491	0.840612	0.0263218	0.426628	3045.89	34.1189
113243	3	43573	2	58	157	60	24.3418	89.15	0.567834	43573	12.21	0.926	-0.4	1	3.94	0.867	0.6	2.3	1247.32	155.793	2.07857	8.26057	1.42056	1.02101	0.96623	0.0363742	0.706514	103.239	1.73864	0.938357	0.0292022	0.651282	99.8803	3.68267	0.970533	0.019681	0.565892	397.989	6.92197	0.940154	0.0130808	0.509836	384.058	14.4989	0.971467	0.0143335	0.433735	1560.27	27.7856
170120551	3	20190812	2	63	164.8	71.3	26.2528	93.6	0.567961	20190722	7.91	0.642	-2.8	-0.8	3.24	0.626	-1.7	0.1	1150.99	53.0191	0.243782	2.97292	0.983072	1.94014	0.785068	0.0285862	0.585261	46.566	2.11136	0.767477	0.0277723	0.58686	45.9636	7.21315	0.796579	0.00789362	0.431449	173.105	7.83091	0.780653	0.00765455	0.431638	170.864	28.41	0.798507	0.00233997	0.295497	667.333	30.5382
414616	3	41058	1	46	168.8	76.7	26.9185	95.89	0.568069	41058	16.19	1.054	0.6	0.8	4.74	0.92	0.6	1.2	1260.13	173.499	1.53167	5.09522	1.58684	1.32704	0.962166	0.0505129	0.74016	108.53	1.85359	0.947038	0.0466828	0.715506	108.516	5.10806	0.964531	0.0336786	0.609243	420.421	7.26157	0.949483	0.0297831	0.581795	420.322	20.3293	0.965285	0.028067	0.476708	1654.7	29.2512
535345		20190924	1	76	167.8	96.2	34.1658	95.4	0.568534	20190924	11.07	0.764	-1.8	-0.4	3.72	0.744	-0.8	0.7	1118.51	46.2355	0.460598	4.51767	0.710104	1.83268	0.730983	0.0356231	0.602179	30.0346	1.85343	0.724031	0.0364836	0.610678	29.8093	6.92878	0.741236	0.00961095	0.437749	109.465	6.91765	0.738334	0.00976163	0.452037	108.751	27.5141	0.744366	0.00282118	0.300931	417.51	27.2245
150065157		20190725	2	56	158.3	73.5	29.3309	90	0.568541	20190725	9.46	0.779	10.96	0.792	-1.6	-1.6	4.34	0.877	0.3	0.3	1301.83	53.7196	0.110199	3.85199	0.256262	1.80149	0.7727	0.0340525	0.622956	159.741	2.13581	0.723326	0.0311888	0.590232	158.71	6.77304	0.502778	296.677	4.06257	0.813401	0.0153604	0.512952	293.276	14.3603	0.84485	0.00415005	0.354864	1152.12	15.6844
542803	3	20161013	2	57	163.9	81	30.1528	93.2	0.568639	20161013	11.12	0.75	17.6	1.039	0.6	0.7	3.48	0.738	-0.6	-0.1	1263.94	58.8262	0.776777	5.65927	0.284804	2.11548	0.778031	0.0295076	0.589175	125.342	3.274	0.646936	0.0257935	0.536454	124.224	7.92285	0.430683	263.579	8.40014	0.712218	0.00844945	0.418917	262.603	32.0964	0.730348	0.00265925	0.291123	1019.34	33.2135
170131647		20191128	1	49	178.3	90.4	28.4358	101.4	0.568704	20191128	12.61	0.834	12.65	0.816	-1.4	-0.6	4.31	0.77	-0.6	0.3	1138.85	59.49	0.527358	5.17904	0.963507	3.32869	0.6913	0.0213342	0.52355	40.5862	3.21362	0.700588	0.0219808	0.538814	40.3108	12.7998	0.402229	344.785	15.6148	0.594143	0.00582471	0.35368	340.033	38.9185	0.750023	0.00214569	0.27352	1342.4	61.8181
150048640		20180604	1	52	173.2	92.8	30.9351	98.5	0.568707	20180604	11.95	0.747	14.21	0.948	-0.3	0.1	4.14	0.853	0.1	0.7	1268.83	64.4779	-0.222759	4.52932	0.370066	3.13211	0.745122	0.0222028	0.53796	130.496	3.2496	0.726883	0.0222151	0.532293	131.363	12.2732	0.333589	152.465	21.8357	0.537136	0.00475573	0.325753	152.199	79.1978	0.581864	0.00166625	0.220596	585.576	87.479
170133182	3	20190719	1	36	177.3	84.9	27.0079	100.9	0.569092	20190719	14.35	0.879	-0.9	-0.6	3.92	0.732	-0.9	-0.6	1225.91	64.9864	0.868552	5.45243	0.647041	4.07209	0.653115	0.0195207	0.516773	94.1605	4.02214	0.652078	0.019838	0.518513	93.4994	15.8221	0.663285	0.00537926	0.368655	358.198	15.7972	0.658798	0.00557213	0.371136	355.434	62.7023	0.667467	0.00184627	0.247004	1396.74	62.9167
150058232	3	20170517	1	41	176.2	81	26.0899	100.3	0.56924	20170517	12.86	0.808	-1.5	-1	3.51	0.668	-1.4	-0.9	1215.4	61.2605	0.0730974	3.32735	0.660732	4.3146	0.63463	0.018299	0.492283	86.8831	4.23831	0.637995	0.0186288	0.501698	86.9844	17.042	0.639393	0.00510787	0.343386	328.625	16.661	0.643721	0.00525721	0.351988	328.945	67.9167	0.64019	0.00181613	0.226365	1279.98	66.2403
391470	3	20170809	2	57	161	69.1	26.6579	91.7	0.569565	20170809	13.28	0.897	-0.6	0.7	3.89	0.752	-0.5	1	1194.98	65.6519	0.911257	6.54236	0.897308	3.28776	0.734655	0.0214793	0.543496	73.3141	3.52271	0.716183	0.0203064	0.523575	73.2892	12.6384	0.743329	0.00596628	0.392144	276.002	13.6354	0.723502	0.00564825	0.374003	275.865	50.0618	0.746094	0.00198462	0.264022	1071.05	54.1547
248264		20150820	1	61	182.4	94.3	28.3441	103.9	0.569627	20150820	14.51	0.879	10.36	0.789	-1.6	-1.3	3.47	0.778	-0.2	0.2	1231.04	44.6747	0.296089	3.42931	0.234598	1.54195	0.757134	0.0397442	0.61661	97.8175	2.90857	0.547347	0.0307749	0.544287	97.0703	5.70351	0.367191	268.587	19.1432	0.590962	0.00510843	0.33818	267.726	61.2765	0.670186	0.00183172	0.247997	1041.76	76.0719
467976		20160812	1	44	173.6	79.5	26.3796	98.9	0.5697	20160812	18.55	0.952	-0.3	0.1	5.24	0.812	-0.3	0.3	1206.85	62.1716	0.0826642	3.32702	0.71835	6.05828	0.508176	0.0164981	0.449977	80.3085	6.75391	0.456512	0.0158081	0.438129	79.3922	23.8057	0.508998	0.00471936	0.310197	303.084	26.293	0.462761	0.00451416	0.308242	299.727	95.5991	0.508662	0.00176953	0.199091	1178.64	105.393
244658		20170222	1	44	173	87.4	29.2024	98.6	0.569942	20170222	10.61	0.762	12.86	0.808	-1.5	-1	3.51	0.668	-1.4	-0.9	1181.42	119.686	2.47164	11.479	1.26011	0.941176	0.960278	0.033083	0.70463	65.2124	1.46154	0.935207	0.0314969	0.677816	62.6048	3.3719	0.446376	383.191	8.68171	0.680216	0.00888752	0.41088	379.317	27.8465	0.746061	0.00289969	0.309488	1493.55	34.3802
150065115		20190516	2	39	158.6	77.2	30.691	90.4	0.569987	20190516	11.48	0.779	13.52	0.942	-0.4	0.1	5.04	0.986	1.1	1.8	1252.31	64.6689	-0.0815718	3.72267	0.467861	3.18064	0.74837	0.0210515	0.535662	117.274	4.03409	0.674682	0.01973	0.514671	116.816	12.2574	0.424312	250.16	9.41428	0.710743	0.00783696	0.406401	246.984	30.7018	0.762972	0.00257445	0.288377	968.635	37.3986
469055	3	20181102	2	49	159.3	69.5	27.3876	90.8	0.569994	20181102	13.53	1.056	0.8	1.1	3.59	0.824	0.2	0.8	1264.53	56.8249	-0.0427501	3.62436	0.260916	1.88944	0.811333	0.0287735	0.611598	126.761	2.83055	0.717468	0.0233032	0.542439	126.448	7.07833	0.820842	0.00813642	0.456714	485.234	10.7191	0.728432	0.00658332	0.393834	484.019	27.7761	0.82372	0.00250247	0.319976	1896.51	42.3384
150162513		20190823	1	50	171.2	87.1	29.7174	97.6	0.570093	20190823	15.29	0.901	9.88	0.761	-1.5	0.2	2.53	0.549	-2.7	-0.6	1165.25	59.8955	0.705391	4.54733	1.01491	2.13092	0.812126	0.0265332	0.586071	54.9357	3.12524	0.721819	0.0227932	0.542285	54.6335	8.05652	0.34969	282.331	25.9209	0.470802	0.00469278	0.303368	277.624	68.2145	0.653319	0.00204637	0.234506	1096.07	103.008
160010901		20170201	2	66	155.4	60.3	24.9698	88.6	0.570142	20170201	5.28	0.493	-3.9	-1.7	2.55	0.502	-3.2	-1	1119.99	58.0342	0.418375	3.50519	0.790035	2.05612	0.80324	0.0277542	0.592147	32.5733	2.89058	0.723897	0.0238275	0.540485	31.9605	7.84985	0.812035	0.00768872	0.435284	119.897	11.1687	0.732896	0.00642034	0.392623	117.408	31.1208	0.813979	0.00233816	0.298771	459.077	44.4169
120162336		20130109	1	54	175.5	85.7	27.8244	100.1	0.57037	20121218	10.23	0.698	-2.4	-1.4	3.61	0.705	-1.1	-0.3	1173.52	42.5749	1.1399	7.57893	0.937193	0.957792	0.833114	0.0710137	0.695476	57.9558	1.16928	0.777566	0.0723354	0.690987	57.1948	3.3461	0.853199	0.0201754	0.536438	217.017	4.18497	0.799875	0.0202913	0.532652	213.961	13.0071	0.857064	0.00567802	0.389542	838.613	16.398
120119729		20170915	1	56	173.3	89.1	29.6675	98.9	0.570687	20170915	10.73	0.823	9.77	0.811	-1.4	0.5	3.08	0.573	-2.1	-0.2	1113.13	62.3659	0.722111	5.13943	0.796852	2.17102	0.811485	0.0252776	0.588545	30.1634	2.13132	0.81741	0.0247597	0.588223	30.3291	8.36983	0.385696	339.731	16.2321	0.601531	0.00574898	0.347526	336.521	50.6795	0.691288	0.00209008	0.258641	1322.1	64.4586
557327	3	20150415	1	35	178.2	86	27.0821	101.7	0.570707	20150415	11.17	0.859	-0.9	0	3.04	0.754	-0.5	0.4	1215.96	42.627	0.749895	4.31073	0.277359	1.1777	0.797698	0.0534785	0.661949	86.3493	1.67594	0.703207	0.0496583	0.631142	85.5615	4.32966	0.812096	0.0147307	0.503957	326.793	6.39889	0.713502	0.0134636	0.473072	323.685	16.8603	0.817852	0.00426819	0.364556	1270.41	25.3741
194367		20200206	2	59	157.1	60.5	24.5134	89.7	0.570974	20200206	10.38	0.802	-1.4	0.1	3.21	0.711	-0.9	0.7	1216.03	73.5463	0.588196	3.28282	0.817363	2.8756	0.826581	0.0190398	0.542803	91.0821	2.81992	0.827573	0.0195144	0.549113	90.5337	11.1893	0.831958	0.00546627	0.391231	346.02	11.0596	0.831586	0.00547767	0.394242	343.805	44.5333	0.833237	0.00191752	0.26367	1347.44	44.1491
111582		20161019	1	49	175.3	80	26.0331	100.1	0.571021	20161019	13.93	0.839	-1.2	-0.6	3.86	0.785	-0.5	0.2	1226.47	60.6463	1.37417	8.3087	0.516887	3.06693	0.690538	0.0247612	0.535477	94.6144	3.15871	0.667996	0.0252692	0.537177	92.9557	11.774	0.700671	0.00686368	0.38404	358.373	12.0719	0.679358	0.00698748	0.381821	351.948	47.0898	0.702443	0.00218884	0.264194	1394.12	48.1846
130182911	3	20160805	2	72	164	73	27.1416	93.7	0.571341	20160805	12.5	0.732	-2.1	0.1	2.82	0.598	-1.9	0.3	1166.44	78.3533	1.30739	12.2112	1.04323	3.05832	0.811053	0.0180135	0.538995	57.6463	3.11968	0.806306	0.0180834	0.5423	56.7032	11.886	0.817014	0.00504471	0.384906	216.037	12.1537	0.812001	0.00506394	0.39429	212.47	46.8696	0.820205	0.00168513	0.264298	836.944	48.167
130069542		20161208	1	44	174.3	82.7	27.2214	99.6	0.571429	20161208	12.18	0.832	-1.3	-0.7	3.39	0.68	-1.3	-0.7	1187.73	69.2245	0.472684	3.8675	0.953091	4.82017	0.672706	0.0164551	0.484775	69.1958	7.01008	0.520339	0.014475	0.444126	67.2849	18.8429	0.679498	0.00480051	0.337859	260.863	28.0471	0.519162	0.00429913	0.304893	253.071	74.7546	0.682065	0.00183038	0.225836	1012.23	111.268
150067126		20190715	1	44	176.2	84.7	27.2817	100.7	0.57151	20190715	15.39	0.89	-0.8	-0.3	4.59	0.9	0.4	1	1224.48	45.1765	0.151537	3.46373	0.354576	2.6541	0.596224	0.0316384	0.555489	91.9001	3.25449	0.501458	0.0298376	0.530531	90.8983	10.1792	0.604306	0.00857951	0.403209	348.585	12.4086	0.514386	0.00815046	0.389926	344.85	40.381	0.606219	0.002677	0.275181	1356.64	48.9801
248242	3	43817	2	52	149.8	59.7	26.6042	85.64	0.571696	43817	16.1	1.136	1.5	1.9	3.19	0.776	-0.2	0.7	1364.76	193.069	1.46836	5.48813	1.47616	1.05952	0.955031	0.121426	0.756242	168.771	2.0186	0.911826	0.107652	0.712482	167.486	4.10348	0.958487	0.0954461	0.640168	660.374	8.18233	0.914628	0.0848052	0.597715	655.068	16.3837	0.959631	0.087528	0.533487	2610.75	33.3805
388540	3	20180125	2	66	162.9	79.3	29.8835	93.2	0.57213	20180125	9.34	0.747	14.42	1.109	1.2	1.6	4.14	0.817	0.1	0.9	1256.54	66.421	0.693431	4.12031	0.390082	2.72137	0.780985	0.0226503	0.561418	119.633	3.74052	0.685952	0.020269	0.52675	118.29	10.3932	0.402798	288.688	15.8222	0.72902	0.00508436	0.366004	286.82	38.0538	0.838696	0.00204108	0.278873	1120.34	62.6186
267754	2	43963	2	77	152.3	51.9	22.3752	87.15	0.572226	43962	18.69	1.14	1.3	1.4	4.82	0.926	0.6	1.3	1294.92	65.488	0.58705	4.37078	0.314161	3.19877	0.702078	0.0223287	0.549499	152.067	3.77815	0.645021	0.0211802	0.52923	151.652	12.5946	0.710446	0.00687818	0.401142	583.977	14.6898	0.65924	0.00644859	0.58437	107.599	24.3964	0.945647	0.027889	0.472981	431.443	30.6088
535349		20180808	1	81	170.9	80.8	27.6648	97.8	0.572264	20180808	10.98	0.659	-2.7	-0.9	3.8	0.659	-1.5	0.1	1132.3	52.028	0.236779	3.43646	0.884387	2.59063	0.698474	0.026901	0.563739	36.725	3.42334	0.597135	0.0243918	0.527262	36.2266	9.84531	0.709969	0.00728841	0.4106	135.52	13.213	0.605713	0.00665485	0.378966	133.473	39.1115	0.711898	0.00223524	0.282011	518.464	52.4882
542997	3	20200512	2	66	159.5	74	29.0878	91.3	0.572414	20200512	7.18	0.65	9.14	0.698	-2.1	-0.8	1.55	0.569	-2.5	-0.8	1184.84	55.7754	0.558513	4.2557	0.930315	2.26982	0.766255	0.0277685	0.583178	66.5955	2.00102	0.794285	0.0289275	0.593356	66.6281	8.37398	0.4198	150.888	14.3197	0.736953	0.00540898	0.361305	148.408	35.9375	0.836014	0.00219574	0.291556	580.454	57.0371
30046		20170406	1	65	174.8	95.9	31.386	100.1	0.572654	20170406	19.62	1.052	0.6	0.8	6.11	1.112	2.1	3.2	1185.8	69.7173	1.98273	16.6624	0.995054	4.12672	0.674814	0.0198634	0.510214	66.4528	3.7883	0.699493	0.0204906	0.524312	66.7426	16.1278	0.683484	0.00540906	0.364133	250.015	14.5952	0.711468	0.00566942	0.375746	251.244	64.7121	0.683394	0.00173292	0.246244	968.957	58.4559
130162287		20170607	2	59	161.5	72.6	27.835	92.5	0.572755	20170607	9.61	0.735	-2	-0.4	2.96	0.596	-1.9	-0.4	1136.68	50.8591	0.644527	4.8836	0.903923	1.68062	0.793892	0.0356849	0.618092	39.2016	2.68889	0.672724	0.0296964	0.560841	38.2841	6.25718	0.804882	0.00979259	0.462546	144.272	10.2757	0.682671	0.00817286	0.403062	140.805	24.497	0.808396	0.00290816	0.324175	553.102	40.6673
150082648		20190318	2	49	159.2	67.5	26.6329	91.2	0.572864	20190318	10.55	0.731	-2.1	-1.3	2.87	0.552	-2.3	-1.7	1162.15	53.6802	0.182909	3.93266	0.996865	2.31389	0.749771	0.0285078	0.578306	52.4517	2.85213	0.683112	0.0259297	0.541939	51.709	8.73436	0.759487	0.00784089	0.427172	196.062	10.9255	0.690633	0.00713219	0.388239	193.151	34.6723	0.761009	0.00237897	0.289307	757.706	43.1548
535355		20180828	1	81	172.1	77.9	26.3012	98.6	0.572923	20180828	7.17	0.595	-3.2	-0.6	2.67	0.566	-2.2	0.2	1151.15	58.6605	0.80677	3.78603	0.967471	1.47992	0.866255	0.0345702	0.632411	47.5119	1.80409	0.837026	0.0306723	0.607424	47.1676	5.46493	0.875257	0.00963349	0.472862	176.649	6.79532	0.844914	0.0083207	0.445435	175.307	21.4761	0.87682	0.00280375	0.334315	681.187	26.8489
535375		20191010	1	75	171	91.4	31.2575	98	0.573099	20191010	11.35	0.836	-1.2	-0.2	3.03	0.6	-2	-0.7	1195.36	61.9997	0.56668	4.03281	0.888341	2.12542	0.818709	0.0256988	0.584957	73.2727	3.32376	0.71442	0.0217293	0.533654	72.9341	7.972	0.82873	0.00699606	0.42862	276.378	13.0828	0.716884	0.00590075	0.384653	274.868	31.5476	0.831434	0.00219199	0.294	1075.37	52.3041
402841		20190909	1	77	173.9	89.6	29.6284	99.7	0.573318	20190909	11.66	0.797	11.5	0.712	-2.3	-1.2	3.58	0.654	-1.6	-0.6	1144.08	146.636	1.6449	5.91127	1.19701	1.76611	0.961042	0.0408496	0.685406	54.7744	1.98	0.955851	0.0395634	0.688355	55.1789	6.87422	0.349925	377.966	32.1683	0.742873	0.00749433	0.331504	371.379	114.116	0.774611	0.00567461	0.250359	1479.03	128.198
150065102	3	43605	2	50	154.8	59	24.6213	88.75	0.57332	43605	8.79	0.732	-2.1	-1.1	3	0.72	-0.8	-0.1	1255.64	192.73	2.2828	8.62559	1.53402	1.09503	0.963847	0.0391461	0.708515	99.5153	2.18596	0.925525	0.0331918	0.663506	96.357	3.98082	0.968143	0.0219419	0.574472	383.493	8.57193	0.929154	0.0165466	0.520627	370.698	15.4246	0.969643	0.0173068	0.449113	1504.09	34.3439
502947		20161216	1	45	172.8	88.9	29.7724	99.1	0.573495	20161216	16.98	1.01	16.32	1.006	0.2	0.5	5.34	0.926	0.6	1.3	1276.21	74.4643	0.219602	2.69045	0.498176	4.15929	0.736042	0.018548	0.527177	137.449	4.25179	0.721569	0.0183632	0.521685	137.269	16.5479	0.342859	302.471	28.1652	0.470295	0.00423843	0.30514	293.887	69.4878	0.673151	0.00184126	0.231373	1175.89	111.561
150149206		20161005	1	42	174.5	79.6	26.141	100.1	0.573639	20161005	13.29	0.94	-0.4	0	4.05	0.87	0.2	0.8	1208.45	56.3522	0.658688	6.0091	0.682949	3.59524	0.623463	0.022035	0.51423	81.4016	3.60842	0.620655	0.0223282	0.525327	80.8975	13.9355	0.632197	0.00614004	0.363792	307.407	13.8982	0.631625	0.00619173	0.380566	305.503	55.4048	0.63473	0.00201475	0.244084	1193.44	55.4167
120043251		20160614	1	80	180.6	94.4	28.9425	103.6	0.573643	20160609	7.46	0.569	15.04	0.964	-0.2	0.2	4.24	0.8	-0.4	0.4	1211.44	54.8274	-0.154259	2.96681	0.642527	3.41612	0.646238	0.0232738	0.529248	84.0312	4.44665	0.536469	0.0205893	0.494158	82.5873	13.0403	0.575407	81.9152	2.25059	0.900773	0.02111	0.583253	80.2984	9.35479	0.898095	0.00545785	0.416118	310.318	8.67765
549802		20170118	1	71	173.8	85	28.1397	99.7	0.573648	20170118	14.89	1.099	5.27	0.543	-3.5	-1	1.94	0.366	-4.7	-1.6	1070.95	45.8935	1.3338	9.13798	0.238712	1.68682	0.724591	0.0481875	0.643477	13.647	1.41012	0.767581	0.0504048	0.653768	13.5816	6.41964	0.332827	198.402	19.2256	0.711189	0.00436182	0.32997	198.662	84.938	0.684204	0.00154679	0.22418	765.689	76.1634
130044208		20150529	2	32	166.3	76.7	27.7339	95.4	0.573662	20150529	14.31	1.102	1.2	1.2	3.96	0.923	1.1	1.56	1314.61	59.061	0.231167	3.71476	0.31829	2.62753	0.69814	0.0301172	0.564845	170.929	4.11969	0.530029	0.0244234	0.516126	169.747	10.2627	0.71031	0.00922919	0.412922	661.079	16.4745	0.538224	0.00747288	0.368321	655.975	41.1461	0.713976	0.00411169	0.2849	2597.6	66.399
300598		20160616	2	55	158.8	68.5	27.1637	91.1	0.573678	20160616	10.31	0.788	-1.6	-0.2	3.03	0.614	-1.8	-0.5	1137.9	52.1475	0.495886	4.89131	0.927865	2.4538	0.710042	0.0291174	0.572271	39.4321	2.87179	0.663695	0.0268405	0.540009	39.1877	9.35652	0.721603	0.00785799	0.412863	145.274	11.1042	0.67209	0.00732197	0.389579	144.211	36.8457	0.724577	0.00236236	0.281708	558.282	43.7354
312759		20180129	1	60	172.9	95.2	31.8454	99.2	0.573742	20180129	13.02	0.832	-1.3	-0.5	2.95	0.592	-2	-1.1	1151.86	62.7344	0.969629	8.24918	1.01803	3.33873	0.712097	0.0208098	0.525865	47.4221	4.54154	0.616766	0.018156	0.487472	47.1743	12.8574	0.72072	0.00575849	0.375105	176.173	17.7503	0.622762	0.00508536	0.341548	175.111	51.2209	0.72274	0.00189496	0.252445	679.329	70.9696
160156247	3	43159	2	54	149.2	53.5	24.0335	85.61	0.573794	43159	7.76	0.657	-2.7	-1.3	3.11	0.65	-1.4	-0.4	1248.72	141.453	0.774302	2.98465	1.42454	0.877171	0.976645	0.051769	0.742091	111.869	1.49968	0.959156	0.0460727	0.708288	111.014	3.14144	0.979801	0.0337589	0.608071	433.824	5.76825	0.961992	0.0301372	0.576653	430.309	12.3251	0.980552	0.0277186	0.481614	1707.25	23.2654
150062121		20170607	2	52	161.7	73	27.9192	92.8	0.573902	20170607	12.79	0.921	-0.4	0.3	3.58	0.758	-0.4	0.4	1234.28	60.7204	1.14681	7.47086	0.476171	1.98776	0.797465	0.028175	0.594284	100.792	3.31572	0.666406	0.0228118	0.530099	99.5141	7.40453	0.809522	0.00784208	0.435701	383.332	12.7684	0.675415	0.00632135	0.379567	378.244	29.2993	0.812107	0.00247195	0.305695	1494.71	50.9036
130143662		20170628	1	58	172.5	96.2	32.3293	99	0.573913	20170628	10.24	0.787	-1.7	-0.8	4.34	807	-0.3	0.6	1225.71	67.7269	0.594093	4.18459	0.691601	3.62745	0.732391	0.0189322	0.519564	95.3258	3.70606	0.725517	0.0188143	0.524845	95.3818	13.9827	0.741827	0.0053871	0.368344	362.37	14.4417	0.732318	0.00541437	0.367218	362.336	55.9623	0.74254	0.00197011	0.251985	1413.08	57.8235
479209		20140409	1	48	168.3	85.5	30.1855	96.6	0.573975	20140410	12.98	0.965	8.3	0.702	-2.3	-1.3	2.78	0.649	-1.4	-0.7	1174.52	50.854	0.646241	4.38163	0.961865	1.6191	0.806155	0.0364942	0.617445	59.713	1.94271	0.764842	0.0346495	0.601425	59.275	5.84328	0.355081	383.841	15.7474	0.639084	0.00560976	0.363551	387.412	71.1232	0.599134	0.00184187	0.237477	1496.1	63.0032
533399		20190212	2	55	159.3	67.4	26.56	91.5	0.574388	20190212	15.64	1	0.1	0.5	4.01	0.688	-1.3	-0.4	1198.04	40.1187	0.571973	4.19929	0.574563	1.01843	0.802675	0.0571004	0.694513	73.3108	0.796296	0.84742	0.0622657	0.717665	73.179	3.59029	0.821848	0.016006	0.536173	276.135	2.7037	0.867319	0.0178311	0.564794	275.68	13.6978	0.829256	0.00456689	0.379262	1072.35	10.2673
546488	3	20190118	2	62	157.5	78	31.4437	90.5	0.574603	20190118	16.54	1.008	0.2	0.5	4.38	0.88	0.3	0.9	1180.42	51.1836	0.875728	8.14256	0.915947	2.14003	0.729178	0.0316488	0.581055	62.5518	1.92972	0.757092	0.0330558	0.589926	62.7608	8.11381	0.740766	0.00854341	0.424058	234.981	7.23598	0.769676	0.00897614	0.438595	235.758	31.9827	0.743488	0.0027039	0.293157	908.926	28.314
190104243	3	20200805	1	53	173.8	88.8	29.3977	99.9	0.574799	20200805	20.49	1.166	11.82	0.849	-1.1	-0.5	3.41	0.728	-1	-0.1	1161.96	61.0813	0.278387	3.6743	1.00699	4.18603	0.648807	0.0185619	0.497442	52.9846	6.21951	0.466432	0.016654	0.453199	51.8566	16.2853	0.34816	521.101	24.9512	0.609632	0.00458367	0.327817	521.064	84.8082	0.676017	0.00226394	0.237848	2041.06	99.6322
130178145		20160905	1	51	177.8	94.6	29.9245	102.2	0.574803	20160905	15.95	0.905	16.25	0.948	-0.3	0.2	3.41	0.683	-1.3	-0.4	1206.72	55.3813	0.412512	4.68183	0.682288	3.24545	0.64984	0.025627	0.536497	79.6948	3.16551	0.654135	0.0259833	0.543187	79.7439	12.6286	0.386186	175.399	11.1384	0.688307	0.00677512	0.388016	175.343	45.4772	0.682741	0.00204344	0.259476	674.601	43.825
170042325		20190227	2	34	164.4	73.5	27.1947	94.5	0.574818	20190227	14.19	1.041	0.6	0.7	3.34	0.641	-1.5	-1.1	1235.62	76.4411	1.69126	9.58022	0.671496	3.44773	0.738694	0.0193474	0.533318	101.494	3.78618	0.712121	0.0190954	0.526263	100.304	13.3235	0.747867	0.0056336	0.383634	386.226	14.7822	0.719196	0.00561807	0.377961	381.518	52.8271	0.751334	0.00206921	0.260916	1507.26	58.8757
541936	3	20161020	2	82	167	74.8	26.8206	96	0.57485	20161012	11.47	0.843	-1.1	-0.3	3.56	0.67	-1.2	-0.5	1226.58	135.899	0.950734	3.03101	1.42419	2.00942	0.947319	0.0380056	0.669371	101.047	1.73944	0.954658	0.0386914	0.667483	100.916	7.88415	0.94977	0.0221133	0.528936	390.757	6.67667	0.957722	0.0231895	0.527816	390.351	31.8027	0.950092	0.0172068	0.407892	1537.09	26.57
400613		20191105	1	57	168	82.3	29.1596	96.6	0.575	20191105	13.12	0.912	15.28	0.926	-0.5	0	4.12	0.801	-0.4	0.4	1216.33	56.3842	0.384833	3.41748	0.589592	2.57875	0.746116	0.0250289	0.565516	88.0144	3.50407	0.646028	0.0224714	0.523356	86.9568	10.155	0.37409	315.739	15.175	0.745735	0.00450556	0.354656	314.129	54.2001	0.770573	0.00163347	0.2529	1228.4	59.995
150058889	3	20150512	1	53	169.9	74.1	25.6703	97.7	0.575044	20150512	15.43	1.008	0.2	0.5	3.78	0.736	-0.9	-0.1	1240.88	69.6442	0.349122	3.81415	0.552651	4.99309	0.644107	0.0164356	0.498422	106.767	4.74621	0.653594	0.0172344	0.498777	106.684	19.8473	0.649949	0.00478058	0.352909	406.605	18.5941	0.664453	0.00495166	0.35575	406.334	79.0088	0.654035	0.0017102	0.234633	1587.61	74.5878
535303		20161111	1	39	169.2	80.8	28.2235	97.3	0.575059	20161111	9.02	0.778	16.49	0.926	0.1	0.2	4.59	0.854	0.3	1	1221.68	60.2584	0.660355	7.2848	0.579278	4.20531	0.608846	0.0209683	0.513774	91.1854	3.98845	0.624847	0.0212692	0.518039	91.2954	16.2729	0.348375	377.044	22.2703	0.664499	0.0039629	0.330995	375.457	78.6102	0.710918	0.00164708	0.228819	1469.66	88.505
150073097		20190314	2	50	164.1	76.9	28.5568	94.4	0.575259	20190314	14.39	1.064	9.45	0.742	-2	-0.7	3.08	0.65	-1.4	-0.4	1178.42	56.9215	0.169864	3.15449	0.945019	2.07213	0.804103	0.0255687	0.5831	62.9377	2.58385	0.753235	0.0236453	0.556918	62.8531	7.76077	0.537851	786.083	9.073	0.746224	0.0351278	0.484481	785.037	28.9576	0.80784	0.026934	0.410611	3101.08	36.9153
150082664		20180411	2	59	161.9	77.8	29.6815	93.2	0.575664	20180411	16.24	1.1	16.63	1.012	0.2	0.6	5.11	0.917	0.6	1.3	1197.28	50.34	0.642454	4.89471	0.755981	3.90758	0.492073	0.0254477	0.510741	72.6811	3.34559	0.576354	0.0263737	0.526835	72.8743	14.9106	0.367971	554.268	16.8747	0.750343	0.00698087	0.387225	555.185	77.1075	0.717037	0.00341806	0.257123	2172.29	67.4045
130154059		20190508	1	59	171.3	87.4	29.7849	98.7	0.576182	20190508	12.68	0.759	9.23	0.721	-2.2	-1.4	3.86	0.7	-1.2	-0.5	1200.72	178.58	2.00182	6.86409	1.47082	1.36101	0.965339	0.0361022	0.699779	74.3772	2.75857	0.926591	0.0288776	0.643852	71.3886	5.0563	0.385048	174.989	11.0619	0.681447	0.00709388	0.401424	174.062	47.2501	0.659601	0.00213663	0.261224	672.897	43.8381
20352	3	20190613	2	73	162.6	83.4	31.5446	93.7	0.576261	20190613	6.52	0.601	-3.2	-0.7	2.57	0.545	-2.4	-0.2	1147.09	60.4891	0.201675	3.69942	0.990949	2.19485	0.806874	0.0252611	0.585865	45.8039	3.60354	0.681168	0.0204196	0.525539	45.0789	8.31741	0.816029	0.0070174	0.423481	170.389	13.9463	0.690071	0.00563399	0.373192	167.424	33.0471	0.817269	0.00222694	0.289219	656.521	55.3289
150073068	3	20190402	2	51	168.5	81.4	28.6698	97.1	0.576261	20190402	8.96	0.769	14.21	1.007	0.2	0.5	4.01	0.769	-0.6	0.3	1218.19	61.9273	0.693789	5.59549	0.663058	3.36649	0.690436	0.0222657	0.526071	88.4069	3.86165	0.642031	0.0210228	0.50297	88.2869	13.2053	0.4977	366.002	5.76667	0.749572	0.0130471	0.470178	361.151	18.4773	0.807894	0.00385471	0.348479	1425.98	22.5283
130084815	3	20130619	1	43	177	85	27.1314	102	0.576271	20130619	13.28	0.949	-0.3	0.1	3.69	0.717	-1	-0.5	1229.4	39.0534	0.321973	4.07223	0.188083	1.52532	0.692021	0.0479179	0.625141	95.3188	2.38497	0.512574	0.0418181	0.576961	94.3386	5.48571	0.71718	0.0131169	0.469765	362.594	8.95359	0.531545	0.0112982	0.42451	358.605	21.4584	0.721127	0.00377804	0.325985	1411.14	35.4255
535355	3	20180828	1	81	174.9	79.9	26.1196	100.8	0.576329	20180828	7.17	0.595	-3.2	-0.6	2.67	0.566	-2.2	0.2	1151.15	58.6605	0.80677	3.78603	0.967471	1.47992	0.866255	0.0345702	0.632411	47.5119	1.80409	0.837026	0.0306723	0.607424	47.1676	5.46493	0.875257	0.00963349	0.472862	176.649	6.79532	0.844914	0.0083207	0.445435	175.307	21.4761	0.87682	0.00280375	0.334315	681.187	26.8489
403402	3	20170911	2	57	164.8	85	31.2971	95	0.576456	20170911	13.96	0.895	-0.6	0.7	4.25	0.785	-0.2	1.3	1197.92	52.372	-0.171631	3.45544	0.733728	2.04118	0.766993	0.0293998	0.588517	74.8813	3.1035	0.650142	0.024719	0.531726	74.3873	7.65068	0.778297	0.00796602	0.433405	281.874	12.0811	0.655086	0.00679044	0.376322	279.782	30.2253	0.780366	0.00236051	0.297786	1093.97	47.7517
450455		20181221	1	58	168.5	91.6	32.2623	97.2	0.576855	20181221	13.09	0.908	-0.6	-0.1	3.82	0.715	-1.1	-0.1	1131.83	65.4537	0.142265	2.90058	0.930408	4.25969	0.678998	0.0165864	0.492167	38.4425	5.57532	0.577583	0.0151105	0.462886	37.3	16.8986	0.682727	0.00481992	0.353096	141.933	21.9922	0.58567	0.00433294	0.322945	137.597	67.2855	0.684667	0.00171097	0.235937	544.677	87.8786
170094991	3	20180906	2	32	160.5	65.1	25.2715	92.6	0.576947	20180906	12.18	0.99	0.2	0.2	3.07	0.676	-1.2	-0.7	1265.71	62.3175	0.713378	5.43382	0.321422	2.38904	0.768611	0.0242751	0.57386	126.916	2.25185	0.782142	0.0252387	0.58532	126.333	8.9619	0.781344	0.0071197	0.418219	484.852	8.39933	0.795284	0.00729857	0.425623	482.7	35.1852	0.785644	0.00240123	0.286832	1893.89	33.0943
130151418		20181226	2	66	163	74	27.852	94.1	0.577301	20181226	11.1	0.844	-2	0	3.05	0.616	-1.7	0.1	1161.58	59.2859	0.562349	3.0411	0.998581	2.00266	0.823505	0.0270768	0.592295	53.4104	2.33467	0.790879	0.025263	0.573607	52.9716	7.61313	0.831815	0.00729886	0.435185	199.924	8.924	0.799875	0.00678598	0.417195	198.153	30.0138	0.834003	0.00215254	0.295871	772.876	35.3724
411833	3	43874	2	62	151.6	52.8	22.9739	87.53	0.577375	43874	13.9	0.85	-1.1	-0.6	4.35	0.886	0.3	0.9	1429.21	260.579	0.951828	3.78513	2.02812	0.891377	0.973815	0.273217	0.827568	176.68	1.69955	0.948922	0.263272	0.803972	176.216	3.40202	0.976296	0.251088	0.744922	697.396	6.74359	0.951849	0.239395	0.521097	425.178	24.5229	0.964457	0.0211093	0.432284	1692.05	41.2126
140073586		20180612	2	43	168	77.5	27.4589	97	0.577381	20180612	13.96	0.953	-0.3	0.1	4.78	0.927	0.7	1.2	1251.14	52.9969	0.264937	3.28301	0.240557	3.41503	0.614379	0.0238597	0.533491	114.761	3.56839	0.602223	0.0235498	0.525583	114.071	12.9461	0.62849	0.00700185	0.386383	437.249	13.7551	0.609957	0.00688672	0.378568	434.569	51.8301	0.629223	0.00238824	0.259689	1708.2	55.2015
150134172	3	20191004	1	47	177.5	81.6	25.8996	102.5	0.577465	20191004	18.04	1.141	1.3	1.4	5.15	0.974	1	1.7	1263.71	73.3315	0.288551	3.83059	0.500913	5.04156	0.657109	0.0154697	0.487381	124.575	5.06536	0.651899	0.0157854	0.488817	125.024	19.9909	0.662687	0.00466015	0.347642	476.919	20.1712	0.65696	0.00472468	0.348592	478.697	79.7571	0.664503	0.00184432	0.234736	1867.29	80.3922
323018		20170404	2	48	165	78.1	28.6869	95.3	0.577576	20170404	16.73	0.996	12.68	0.759	-1.9	-1	3.18	0.582	-2.1	-1.2	1153.11	52.4381	0.302232	3.56805	0.992966	3.13727	0.646016	0.0246747	0.533657	47.051	2.91477	0.671309	0.025534	0.551286	46.8131	11.924	0.379507	435.123	15.0403	0.702727	0.00498684	0.35729	432.316	49.705	0.755496	0.00184501	0.253411	1699.39	60.231
516280		20170921	2	68	161.5	71.8	27.5283	93.3	0.577709	20170921	11.6	0.857	-1	-0.5	3.32	0.693	-1	-0.5	1141.16	84.368	1.16317	8.65525	1.02432	5.23897	0.714797	0.0136635	0.482747	44.4081	5.22025	0.711367	0.013797	0.477934	44.1404	20.8331	0.717142	0.00413495	0.338451	165.389	20.561	0.716472	0.00410191	0.334406	164.429	83.7603	0.718629	0.00186527	0.22843	637.279	82.9143
140103113		20190208	1	58	174.6	80	26.2423	100.9	0.577892	20190208	19.9	1.187	1.7	1.7	5.99	0.992	1.2	2.1	1212.47	72.5121	0.201469	3.29964	0.818995	6.04366	0.626399	0.012954	0.456237	86.3194	9.66066	0.401004	0.0112794	0.411625	84.4444	23.9133	0.629836	0.0038661	0.315226	326.101	38.352	0.405024	0.00338753	0.281189	318.746	94.9545	0.631596	0.0014108	0.203535	1268.88	152.684
150069991	3	20170608	2	49	164.7	71.8	26.469	95.2	0.578021	20170608	11.19	0.875	-0.8	-0.2	3.81	0.777	-0.2	0.3	1177.98	55.0821	0.416054	3.3429	0.948155	1.7714	0.818358	0.0303819	0.603835	62.0841	2.14038	0.77898	0.0282246	0.580903	61.7932	6.50371	0.830343	0.00833235	0.442917	232.502	8.07391	0.787907	0.00771802	0.425209	231.302	25.5443	0.833485	0.00242897	0.303627	900.004	31.7946
120063707	3	20170828	2	46	166.7	77.3	27.8169	96.4	0.578284	20170828	10.96	0.831	-0.9	-0.7	5.1	3.01	-2.2	-1	1187.54	57.1652	0.589478	3.90384	0.911045	2.53065	0.757283	0.0254331	0.558085	68.0371	3.17561	0.693157	0.023839	0.527407	67.6878	9.62903	0.767055	0.00726847	0.408977	256.273	12.3244	0.700254	0.00668121	0.37833	254.848	38.2694	0.767918	0.00243496	0.277635	993.297	49.1171
130184692		20161202	1	54	181.5	91.6	27.8062	105	0.578512	20161202	11.22	0.751	-1.9	-1.1	3.65	0.713	-1.1	-0.2	1153.16	38.3802	0.235942	4.56503	0.994874	1.42402	0.697932	0.0530057	0.649531	45.7686	1.14912	0.75623	0.0555579	0.661988	45.6967	5.21764	0.71664	0.0146022	0.490797	169.737	4.05326	0.779508	0.0151185	0.500751	169.471	20.4972	0.720496	0.0042033	0.347818	652.178	15.869
535349	3	20180808	1	81	172.1	76	25.6597	99.6	0.578733	20180808	10.98	0.659	-2.7	-0.9	3.8	0.659	-1.5	0.1	1132.3	52.028	0.236779	3.43646	0.884387	2.59063	0.698474	0.026901	0.563739	36.725	3.42334	0.597135	0.0243918	0.527262	36.2266	9.84531	0.709969	0.00728841	0.4106	135.52	13.213	0.605713	0.00665485	0.378966	133.473	39.1115	0.711898	0.00223524	0.282011	518.464	52.4882
140108697	3	20170517	2	43	158.9	65.6	25.981	92	0.57898	20170517	16.9	1.195	2.4	2.3	5.06	1.091	3.3	3.6	1310.1	69.2828	-0.291315	2.86133	0.454827	2.67708	0.792458	0.0300405	0.581723	170.01	3.12962	0.754562	0.0260365	0.544933	169.581	10.5965	0.800748	0.0104552	0.426347	655.72	12.5561	0.761076	0.00918161	0.395929	653.951	42.4694	0.801855	0.00514371	0.303571	2576.22	50.4495
150082295		20190724	1	52	180.6	95.9	29.4024	104.6	0.579181	20190724	14.2	1.026	13.09	0.908	-0.6	-0.1	3.82	0.715	-1.1	-0.1	1131.83	65.4537	0.142265	2.90058	0.930408	4.25969	0.678998	0.0165864	0.492167	38.4425	5.57532	0.577583	0.0151105	0.462886	37.3	16.8986	0.353672	310.924	21.9062	0.624368	0.00429008	0.328947	307.851	64.3698	0.725103	0.00176379	0.234673	1208.66	87.2918
130018496		20151224	2	57	158.8	71.1	28.1948	92	0.579345	20151224	9.14	0.771	11.34	0.789	-1.6	-0.9	3.36	0.645	-1.6	-0.9	1200.02	60.3295	0.641804	5.32736	0.801841	4.41417	0.599918	0.0198639	0.504436	75.2817	4.93944	0.552613	0.0191219	0.483464	74.9563	17.07	0.385563	237.837	11.9367	0.695826	0.00632406	0.377199	237.78	48.861	0.691136	0.00223074	0.264237	919.958	47.0941
170038232	3	20190812	2	67	166.9	77.6	27.8579	96.7	0.579389	20190812	8.97	0.667	-2.6	-0.5	3.03	0.687	-1.1	1	1154.37	47.5982	0.321299	3.75066	0.994824	2.31978	0.681466	0.0317281	0.574894	47.1328	2.32993	0.674977	0.0323439	0.563408	46.751	8.7378	0.693652	0.00875985	0.416524	175.007	8.83129	0.685579	0.00883706	0.409229	173.52	34.7466	0.695491	0.00274124	0.284567	673.529	34.8231
244658	3	20170222	1	44	168.2	74.3	26.2625	97.5	0.579667	20170222	10.61	0.762	-1.9	-1.2	3.57	0.596	-2	-1.4	1234.68	46.8066	0.224399	3.77532	0.265007	1.88384	0.730131	0.0360776	0.606316	100.91	2.2963	0.668387	0.0329191	0.564338	99.93	7.02588	0.743959	0.00970695	0.446376	383.191	8.68171	0.680216	0.00888752	0.41088	379.317	27.8465	0.746061	0.00289969	0.309488	1493.55	34.3802
150067252		20170609	2	43	155.4	63.9	26.4605	90.1	0.579794	20170609	8	0.776	-1.7	-1.3	2.57	-0.629	-1.6	-1.1	1290.22	56.8738	0.0153452	4.10369	0.249108	1.51991	0.838599	0.0340696	0.635076	149.119	2.68634	0.69822	0.028144	0.56595	148.515	5.81152	0.847691	0.00995935	0.478655	573.496	10.4865	0.709782	0.00816052	0.413467	571.049	22.9595	0.849647	0.00343478	0.33749	2249.5	41.5597
150130574	3	20151013	1	35	177.1	83.6	26.6544	102.7	0.579898	20151013	14.06	0.882	-0.9	-0.6	4.41	0.878	0.3	0.6	1220.4	56.5875	0.198403	3.5867	0.563125	2.66024	0.735203	0.0253696	0.564309	90.6466	3.9229	0.600646	0.0215233	0.505746	89.6468	10.2286	0.744055	0.00694332	0.405274	343.191	15.5334	0.601973	0.0059196	0.352536	339.063	40.599	0.745735	0.00217331	0.273997	1335.97	61.4841
549349	3	20161124	1	45	176.4	79.2	25.4524	102.3	0.579932	20161124	14.9	0.954	-0.3	0.1	4.22	0.848	0	0.7	1280.76	60.5204	0.321963	3.32709	0.277072	3.82074	0.634232	0.0196905	0.514896	139.769	3.64768	0.64967	0.0204703	0.522226	139.674	15.0007	0.640588	0.00581509	0.365281	535.184	14.1702	0.659589	0.00609365	0.37429	534.955	59.6593	0.644536	0.00213553	0.251476	2095.58	56.7016
160080494		20160629	1	56	174.8	95.9	31.386	101.4	0.580092	20160629	16.25	0.944	0.3	0.4	4.7	0.84	0.1	1	1232.29	65.6876	-0.0140941	3.34356	0.564303	5.63056	0.579476	0.0152117	0.462651	100.008	5.04473	0.621281	0.0160073	0.474369	100.063	22.3077	0.582808	0.00429799	0.317142	380.257	19.5498	0.632716	0.00454244	0.330544	380.761	88.9986	0.58447	0.00161586	0.207444	1484.54	77.6876
130030238		20150529	1	55	171	77.3	26.4355	99.2	0.580117	20150529	14.51	0.868	-1	-0.4	3.96	0.763	-0.7	0.2	1211.91	44.6817	0.507857	3.92394	0.437767	2.05205	0.682811	0.0360569	0.581341	83.014	2.4342	0.60825	0.0341183	0.55851	81.9113	7.73158	0.696834	0.00984987	0.42889	313.96	9.30141	0.618988	0.00924122	0.401454	309.479	30.5754	0.699101	0.00297049	0.294501	1219.04	36.6516
445278		20160620	2	57	161.4	77.8	29.8657	93.7	0.580545	20160620	9.32	0.72	14.35	0.923	-0.5	-0.1	3.8	0.728	-1	-0.3	1177.59	140.18	1.65725	5.66573	1.27782	1.30967	0.964986	0.0316923	0.677057	68.1231	2.47527	0.932266	0.0301283	0.651455	66.454	4.85125	0.409514	240.912	15.7752	0.72069	0.00528529	0.362741	238.375	42.3105	0.812221	0.00206981	0.281267	934.378	62.5248
130027306	3	20190215	2	65	163.1	70.8	26.6149	94.7	0.580625	20190215	7.66	0.662	-2.7	-0.6	2.72	0.58	-2.1	-0.3	1173.88	68.1138	0.673777	2.77513	0.999794	1.2715	0.915662	0.0308216	0.64918	62.7631	1.69859	0.88373	0.0277497	0.607783	61.7051	4.66631	0.922353	0.00839154	0.489189	236.296	6.23268	0.893079	0.00768234	0.448862	232.279	18.2017	0.924268	0.00250936	0.34319	916.39	24.5747
160090303		20190621	2	51	155	65.6	27.3049	90.1	0.58129	20190621	12.1	0.872	-0.8	-0.1	2.68	0.582	-2.1	-1.3	1178.8	58.1429	0.151343	3.27924	0.936095	3.01587	0.715982	0.0222277	0.536458	62.605	3.37332	0.685439	0.0211112	0.520076	62.3739	11.4298	0.729787	0.0061065	0.381927	235.363	13.1695	0.691655	0.00578736	0.366739	234.247	44.942	0.733397	0.0019545	0.260076	911.212	51.9364
549349	3	20180921	1	47	176.4	79.2	25.4524	102.8	0.582766	20180921	14.21	0.933	-0.4	0	4.32	0.877	0.2	0.9	1260.43	62.3802	0.155398	3.24106	0.354328	3.86457	0.672374	0.019121	0.505649	122.793	3.77617	0.670855	0.0202608	0.514127	123.077	15.3646	0.675756	0.00546447	0.353859	469.287	14.7052	0.680908	0.00569747	0.365274	470.397	61.3673	0.678094	0.00189853	0.233476	1833.94	58.9291
120063707	3	20190925	2	48	166.9	79.1	28.3964	97.3	0.582984	20190925	11.68	0.829	7.83	0.614	-1.8	-1.4	2.97	0.562	-2.9	-1.7	1090.28	58.6965	0.441874	3.74263	0.536843	3.40915	0.651458	0.0248669	0.540552	21.039	4.04274	0.587632	0.0232139	0.512549	20.4353	13.4323	0.365695	243.025	21.6875	0.573749	0.00498724	0.325398	239.261	59.1301	0.713575	0.00218765	0.244618	942.74	86.8911
140085451		20190916	2	63	155.7	64.3	26.5237	90.8	0.583173	20190916	9.88	0.761	-1.5	0.2	2.53	0.549	-2.7	-0.6	1165.25	59.8955	0.705391	4.54733	1.01491	2.13092	0.812126	0.0265332	0.586071	54.9357	3.12524	0.721819	0.0227932	0.542285	54.6335	8.05652	0.819177	0.00740601	0.433912	204.949	11.9197	0.730443	0.00635595	0.39451	203.882	31.6845	0.822122	0.00221569	0.301456	791.71	47.1325
130069542	3	20141010	1	42	172.5	75	25.2048	100.6	0.583188	20141010	11.94	0.819	-1.7	-1.1	3.67	0.697	-1.2	-0.6	1182.61	57.273	0.480244	4.45577	0.926946	4.76215	0.534405	0.0204294	0.477959	63.6866	4.34089	0.57736	0.0213308	0.494245	63.4359	18.3255	0.542107	0.00604173	0.331356	238.603	16.5179	0.588922	0.00625642	0.350956	237.796	73.5356	0.541576	0.00212041	0.220293	924.758	65.4481
150066499		20150521	2	51	162	72.5	27.6254	94.5	0.583333	20150521	13.78	0.95	-0.2	0.4	3.88	0.83	0.3	0.9	1238.33	57.9872	0.551312	4.05134	0.420045	2.8989	0.707005	0.0238602	0.541333	104.207	3.2125	0.676724	0.0230061	0.530905	103.604	11.4872	0.713014	0.0065494	0.381055	397.385	12.7368	0.683081	0.00641544	0.385742	395.006	45.7201	0.714496	0.00221498	0.259907	1548.54	50.7316
170022332	3	20190111	2	47	169.7	72.6	25.21	99	0.583382	20190111	8.93	0.687	-2.4	-1.8	2.45	0.502	-2.8	-2.3	1212.99	56.8396	0.86501	7.05358	0.636626	1.40994	0.841915	0.0362607	0.638665	84.9363	1.73032	0.807251	0.0332608	0.606267	83.8361	5.20117	0.85434	0.00999692	0.482691	322.209	6.31962	0.824141	0.00917839	0.452224	317.988	20.2363	0.857472	0.00302657	0.339766	1251.72	24.6533
190056524	3	20200623	2	62	163	74.3	27.9649	95.1	0.583436	20200623	10.2	0.81	-1.4	0.3	3.95	0.868	0.6	2.6	1214.56	86.0778	0.584119	3.75887	0.971489	4.54382	0.779526	0.0143617	0.506339	89.5455	4.7722	0.765141	0.0142359	0.491084	89.1176	18.0393	0.783747	0.00451088	0.359972	341.263	19.0518	0.76833	0.00454467	0.352111	339.541	72.38	0.784922	0.00201564	0.247904	1332.42	76.5066
548937	3	20190417	2	75	161.8	69	26.3568	94.4	0.583436	20190417	14.02	0.933	-0.4	-0.4	4.41	0.805	-0.3	-0.1	1141.19	55.8968	0.788661	5.76142	0.97279	2.2186	0.769294	0.0277579	0.575633	41.3217	1.99451	0.794831	0.0285706	0.587147	41.3386	8.41705	0.777632	0.00786852	0.41822	152.989	7.3315	0.808732	0.0080151	0.432691	153.212	33.2442	0.77988	0.00255393	0.283867	587.567	28.8574
130037875	3	20130319	1	50	163.4	71.1	26.6297	95.4	0.583843	20130319	17.47	1.034	0.4	0.7	3.78	0.73	-0.9	-0.2	1208.49	51.7851	0.427084	4.74388	0.604546	2.9623	0.643111	0.0268172	0.535709	80.8307	3.34551	0.599577	0.0268664	0.542482	80.6505	11.2163	0.657263	0.0075542	0.385369	305.299	12.8246	0.610553	0.00750853	0.394111	304.61	44.4365	0.659506	0.00238655	0.255564	1186.55	50.6405
447321	3	42829	2	60	151.1	58.5	25.6228	88.25	0.58405	42829	7.8	0.652	-2.5	-0.9	2.7	0.62	-1.9	-0.1	1222.72	165.498	1.40749	4.39122	1.52075	1.32531	0.968742	0.0536643	0.723864	90.434	2.5989	0.937489	0.0483898	0.681655	87.84	4.93711	0.971833	0.0311065	0.591251	350.145	10.3231	0.93973	0.0282788	0.561877	339.768	19.4814	0.972661	0.0232871	0.468361	1377.58	41.2175
454989	3	42335	2	58	155.5	67.9	28.0808	90.82	0.584051	42335	11.556	0.753	8.39	0.676	-2.5	-0.5	2.78	0.591	-2	-0.2	1134.4	43.146	0.319774	4.22911	0.872102	2.04563	0.64927	0.0387491	0.586321	36.6852	2.18007	0.622436	0.037781	0.589424	36.6286	7.57077	0.598215	411.715	10.7471	0.946818	0.0332345	0.55977	406.685	21.5541	0.974251	0.0352652	0.488161	1624.24	43.5261
448995		20190118	2	74	154	74.9	31.5821	90	0.584416	20190213	3.78	0.551	-3.4	-1.1	1.57	0.356	-4.8	-2.1	1113.28	37.4235	2.32999	15.1012	0.437035	0.612245	0.86108	0.104876	0.758553	27.1722	0.699615	0.834063	0.100097	0.745764	26.7373	1.96471	0.886035	0.0312561	0.610869	98.7313	2.34917	0.858322	0.0288146	0.592617	97.0039	7.32313	0.892919	0.00858872	0.453171	375.31	8.98802
120006023	3	43178	1	58	168.4	80.2	28.2807	98.43	0.584501	43178	13.2	0.872	13.94	0.926	-0.5	0	3.98	0.743	-0.8	0	1249.18	129.997	0.607425	2.93673	1.34629	1.68152	0.954497	0.0387721	0.679531	117.232	2.0849	0.943811	0.0345844	0.666799	115.598	6.46851	0.55723	312.553	7.1413	0.962546	0.021557	0.525023	311.175	21.5191	0.972125	0.017796	0.436889	1228.73	28.5996
150107617	3	20200608	2	60	167.1	83.5	29.9043	97.7	0.58468	20200608	7.4	0.645	9.94	0.763	-1.9	-1.1	3.87	0.708	-1.1	-0.4	1245.54	182.047	1.26615	4.6417	1.6325	1.51197	0.967184	0.0482084	0.699307	105.683	2.95291	0.93534	0.0425111	0.671155	104.495	5.87149	0.434399	223.027	7.17225	0.794011	0.00909625	0.446921	222.133	27.9547	0.797176	0.00290541	0.296876	862.072	28.2392
150119401	3	20170928	2	46	160.4	82.4	32.0272	93.8	0.584788	20170928	13.43	1.021	0.5	0.6	3.11	0.672	-1.2	-0.7	1329.69	62.9358	0.928334	4.40331	0.492046	1.30303	0.81423	0.0545558	0.687621	181.685	2.01839	0.711925	0.0458977	0.622261	180.608	5.00303	0.830404	0.0246499	0.537036	703.697	7.86667	0.732507	0.0211805	0.482169	699.13	19.6409	0.837615	0.015978	0.40766	2769.24	31.5824
180119073		20180912	2	77	158.8	70.8	28.0758	93	0.585642	20180912	4.56	0.48	10.38	0.802	-1.4	0.1	3.21	0.711	-0.9	0.7	1216.03	73.5463	0.588196	3.28282	0.817363	2.8756	0.826581	0.0190398	0.542803	91.0821	2.81992	0.827573	0.0195144	0.549113	90.5337	11.1893	0.484723	84.3503	7.50293	0.767297	0.00926742	0.441609	82.8292	21.3169	0.833267	0.00330626	0.345535	319.728	29.5689
413034	3	20190610	2	57	164.4	69.1	25.5667	96.3	0.585766	20190610	10.26	0.756	-1.8	-0.4	3.59	0.734	-0.6	0.8	1187.29	66.0241	0.416121	3.72889	0.934487	2.88238	0.790558	0.0202168	0.549363	69.479	4.19272	0.684331	0.0178492	0.500728	67.3697	11.1091	0.7973	0.00549793	0.394854	261.695	16.3616	0.690461	0.00494321	0.352696	253.351	43.8327	0.799383	0.0016861	0.270042	1016.1	65.0072
130037037	3	20170331	2	42	162.1	70.4	26.7921	95	0.586058	20170331	16.12	1.124	1.7	1.7	4.5	0.956	1.8	2.3	1257.89	71.6775	0.141501	3.70963	0.524988	4.93717	0.666573	0.0149439	0.491103	121.187	4.4093	0.695958	0.0155023	0.489419	121.494	19.4603	0.673191	0.00439517	0.343467	463.626	17.3395	0.702455	0.00453461	0.346191	464.769	77.6495	0.675547	0.00165956	0.22805	1812.58	69.3615
170040026		20200429	2	63	159.3	72.8	28.688	93.4	0.586315	20200429	9.18	0.701	14.68	1.08	1	1.3	4.55	0.939	1.3	1.8	1310.84	74.7018	0.0322012	2.86506	0.519051	3.53324	0.744585	0.0315133	0.560899	167.391	3.23684	0.759675	0.0331833	0.569779	167.322	14.2498	0.472188	191.678	8.63068	0.737076	0.00842522	0.419002	189.155	22.1174	0.835905	0.00283845	0.330669	740.211	34.1141
150038595	3	20190704	2	49	163.2	67.6	25.3809	95.7	0.586397	20190704	12.95	0.934	-0.3	0.2	3.33	0.655	-1.4	-0.8	1214.49	56.871	0.918483	7.23234	0.629807	3.4154	0.620878	0.0247376	0.525838	84.8902	3.38249	0.629667	0.0249575	0.536991	84.6075	13.1723	0.633286	0.00693179	0.376437	321.044	13.1759	0.638549	0.00688767	0.383705	319.829	52.5107	0.635016	0.00227613	0.255776	1249.36	52.5522
150089599		20170323	1	62	175.1	88.9	28.9954	102.7	0.586522	20170323	11.82	0.81	9.2	0.732	-2.1	-1.4	2.61	0.626	-1.7	-1.1	1175.39	62.8602	0.812259	5.92906	1.00775	2.50427	0.783085	0.0237968	0.573319	61.0915	2.24054	0.808029	0.0246034	0.582094	61.0147	9.6128	0.407385	192.372	10.421	0.795513	0.00593848	0.405634	191.909	39.6372	0.809766	0.00185379	0.273778	741.561	41.5098
414616		20131104	1	47	174	88.9	29.3632	102.1	0.586782	20131104	15.63	1.009	13.36	0.892	-0.8	-0.2	3.87	0.709	-1.1	-0.4	1184.48	148.615	1.82389	6.82444	1.34876	1.10209	0.970528	0.0326605	0.724601	70.7087	3.13468	0.915423	0.0257726	0.653098	69.8181	3.98775	0.361933	358.954	18.9565	0.582013	0.00528025	0.345811	356.453	63.0324	0.650997	0.00184752	0.245003	1398.11	75.2788
130153089	3	20151008	1	47	174.9	84.5	27.6234	102.7	0.587193	20151008	16.47	1.096	0.9	1.1	4.71	0.923	0.6	1.3	1243.92	61.8646	0.0299079	3.67513	0.455582	3.18889	0.733776	0.0230074	0.544331	109.342	2.78205	0.763507	0.0237737	0.559013	109.692	12.2372	0.743291	0.00626543	0.397597	417.656	10.6048	0.773694	0.00642486	0.408321	419.098	48.6272	0.74495	0.00201728	0.270394	1630.43	42.0167
160074837		20200529	1	48	176.2	83.2	26.7986	103.5	0.587401	20200529	15.7	0.887	-0.8	-0.3	4.01	0.767	-0.6	0.1	1157.64	63.4985	0.913433	7.27104	1.03463	3.47045	0.704027	0.0210499	0.520411	50.4638	4.92045	0.582135	0.0183538	0.479377	49.617	13.3943	0.71161	0.00581214	0.373301	187.812	19.0833	0.591015	0.00504557	0.335584	184.522	53.3546	0.71295	0.00180161	0.250806	724.413	75.9896
510328		20200805	1	53	171.6	80.3	27.2697	100.8	0.587413	20200805	13.62	0.884	-0.8	-0.3	4.21	0.708	-1.1	-0.3	1215.21	59.2588	0.0963603	3.60727	0.623613	3.33254	0.699252	0.0211892	0.518263	87.5437	3.84443	0.659982	0.0207131	0.513865	86.4403	12.7254	0.710695	0.00606324	0.371036	331.923	14.8829	0.668789	0.00581283	0.366026	327.695	50.1905	0.713491	0.00211262	0.250334	1290.51	59.0465
393421	3	42601	2	55	155.8	65.3	26.9016	91.57	0.587741	42586	9.35	0.68	-2.5	-1	3.06	0.61	-1.8	-0.6	1142.38	122.45	1.86076	6.35435	1.06422	1.42571	0.957182	0.0458014	0.689349	50.7524	2.77035	0.915049	0.0471933	0.655356	47.6793	5.22381	0.96134	0.0150331	0.540909	192.514	10.8808	0.917963	0.0147715	0.510606	180.258	20.699	0.962033	0.00625669	0.405971	749.793	43.5814
150062121	3	20170607	2	52	160.6	69.7	27.0235	94.4	0.587796	20170607	12.79	0.921	-0.4	0.3	3.58	0.758	-0.4	0.4	1234.28	60.7204	1.14681	7.47086	0.476171	1.98776	0.797465	0.028175	0.594284	100.792	3.31572	0.666406	0.0228118	0.530099	99.5141	7.40453	0.809522	0.00784208	0.435701	383.332	12.7684	0.675415	0.00632135	0.379567	378.244	29.2993	0.812107	0.00247195	0.305695	1494.71	50.9036
190072320	3	20200708	2	52	165.6	74.8	27.276	97.4	0.588164	20200708	12.28	0.919	-0.4	0.3	2.94	0.711	-0.9	-0.1	1216	63.3746	0.835305	5.06054	0.717199	2.75631	0.762007	0.0231904	0.559124	87.3213	2.64762	0.771473	0.0236856	0.565949	87.6171	10.6913	0.769781	0.00640081	0.408562	331.224	10.2025	0.78024	0.00652053	0.407779	332.287	42.6755	0.770866	0.00211713	0.280318	1288.58	40.4743
170075965		20180706	2	55	162.5	78.4	29.6899	95.6	0.588308	20180706	10.03	0.81	12.79	1.027	0.4	0.7	4.49	0.877	0.2	1.2	1266.27	88.8426	0.346412	3.99989	0.73165	5.86038	0.707053	0.0151222	0.482605	127.678	7.23956	0.625063	0.0135394	0.454326	127.341	23.4927	0.404211	324.833	13.4441	0.694804	0.00580396	0.381525	320.869	39.4293	0.777435	0.00239269	0.272866	1263.89	53.0668
543896		20120719	1	52	168.1	80.4	28.4525	98.9	0.58834	20120719	10.96	0.711	16.37	1.024	0.3	0.7	4.91	0.759	-0.7	0.6	1130.18	74.8366	1.29241	12.2403	0.971805	4.80176	0.660397	0.0159322	0.498774	36.9453	6.22876	0.569286	0.0143757	0.465925	36.8835	19.0218	0.406211	239.693	11.3492	0.705713	0.00701557	0.394283	237.103	42.8605	0.724745	0.00230126	0.279064	928.102	44.7708
140162756		20190419	1	50	179.4	83.9	26.0686	105.6	0.588629	20190419	15.03	0.967	-0.1	0.3	4.76	0.882	0.3	1	1285.63	53.2899	0.25047	3.297	0.147559	2.29068	0.730626	0.0288774	0.576582	145.147	3.38	0.604231	0.0249679	0.5273	144.598	8.69002	0.744687	0.00794379	0.42353	557.379	13.1778	0.615147	0.00683395	0.376896	555.173	34.305	0.748684	0.00261	0.292945	2182.58	52.2622
319779		20161004	1	60	176	90.9	29.3453	103.6	0.588636	20161004	11.38	0.736	10.89	0.842	-1.1	0.1	3.59	0.653	-1.4	-0.2	1196.57	73.291	0.211384	2.96158	0.907149	3.66828	0.782945	0.0158925	0.526928	77.3927	3.6438	0.784316	0.0155942	0.52299	76.6812	14.2798	0.367868	186.479	11.8375	0.644311	0.0069976	0.390765	185.651	54.5803	0.591418	0.0020193	0.247937	719.105	46.7157
161554	3	20130327	2	32	159	63.5	25.1177	93.6	0.588679	20130327	6.53	0.668	-2.6	-2.6	2.52	0.568	-2.2	-1.6	1215.93	48.3832	-0.26856	4.9602	0.475978	1.51453	0.79461	0.0401893	0.627471	86.8907	1.54837	0.78969	0.0405677	0.635975	86.7564	5.51919	0.809932	0.0110262	0.471018	328.833	5.66026	0.804587	0.0111388	0.476526	328.367	21.8977	0.811445	0.00319227	0.332161	1278.86	22.2115
170165422		20171205	2	67	162	70.9	27.0157	95.4	0.588889	20171205	11.08	0.869	-0.9	0.9	2.94	0.737	-0.6	1.6	1215.35	84.6034	0.504648	3.52311	0.94069	2.7575	0.867361	0.0178312	0.563454	91.7875	3.80613	0.813216	0.016313	0.532097	91.1382	10.5569	0.874306	0.00540391	0.411215	349.136	14.9112	0.818748	0.0049073	0.376841	346.422	41.8813	0.876118	0.00207891	0.283632	1360.5	59.5403
423947	3	20180102	2	54	159.9	64	25.0313	94.2	0.589118	20180102	14.71	0.958	-0.1	0.8	3.6	0.671	-1.2	-0.2	1207.56	66.5115	1.31018	9.80375	0.793155	2.64226	0.773787	0.024066	0.570694	81.4089	3.22361	0.720684	0.0219928	0.544403	80.9809	9.96786	0.784551	0.00672406	0.419797	307.913	12.4287	0.728569	0.0061874	0.393446	306.12	39.3821	0.787624	0.00219955	0.284662	1197.33	49.2791
130174987		20141021	1	56	179.4	90.1	27.995	105.7	0.589186	20141024	15.95	0.888	-0.8	-0.2	4.68	0.822	-0.2	0.7	1179.27	56.6942	0.990076	7.14511	0.970068	3.17626	0.664151	0.0259376	0.540446	61.6962	3.21336	0.646415	0.0256023	0.531361	60.7535	12.443	0.670848	0.00692418	0.38772	231.501	12.6117	0.652939	0.00684839	0.374529	227.866	49.1081	0.67375	0.00220243	0.25909	896.552	50.1294
150038582	3	20190704	2	49	171.4	85.1	28.9673	101	0.589265	20190704	16.77	1.163	16.08	1.073	0.7	1	5.03	0.926	0.6	1.4	1224.18	64.2964	0.34265	3.67729	0.617606	3.97531	0.687806	0.017991	0.508748	93.6335	4.33127	0.654915	0.0172884	0.495396	93.4062	15.3866	0.429094	614.628	12.0121	0.695373	0.00807688	0.398542	609.68	42.3844	0.733203	0.00384678	0.305352	2409.97	47.8381
120118050		20161201	1	55	176.3	93.9	30.2107	103.9	0.589336	20161201	14.89	0.955	14.31	0.879	-0.9	-0.5	3.23	0.673	-1.4	-0.9	1250.15	61.23	0.275279	3.64366	0.371922	4.42176	0.609543	0.0182757	0.493088	114.023	4.49644	0.594937	0.0183546	0.486455	113.015	17.4104	0.342109	337.191	19.0069	0.658936	0.00459683	0.339482	333.615	70.5648	0.690335	0.00178969	0.225321	1314.33	75.7019
543521	3	20171218	2	49	159.3	65.9	25.9689	93.9	0.589454	20171218	12.01	0.915	-0.6	-0.1	3.89	0.801	-0.4	0.4	1227.5	66.5684	0.689807	4.9321	0.63275	2.65809	0.788111	0.0220394	0.557905	97.0353	3.43089	0.726067	0.0201982	0.536553	96.3962	10.3184	0.795549	0.00632245	0.410142	369.925	13.4745	0.732508	0.00594611	0.390451	367.455	40.95	0.797348	0.00222426	0.282213	1441.39	53.8707
130142977		20190723	1	50	172	90.8	30.6923	101.4	0.589535	20190723	9.94	0.724	15.03	0.967	-0.1	0.3	4.76	0.882	0.3	1	1285.63	53.2899	0.25047	3.297	0.147559	2.29068	0.730626	0.0288774	0.576582	145.147	3.38	0.604231	0.0249679	0.5273	144.598	8.69002	0.364534	216.548	21.5346	0.565738	0.00482752	0.328158	210.57	58.7928	0.709462	0.00174535	0.246096	836.855	85.7495
457212	3	43195	2	69	147.2	52.6	24.2756	86.82	0.58981	43195	8.23	0.787	-1.6	0.4	2.56	0.643	-1.5	0.6	1273.62	189.998	1.2284	4.08836	1.67996	1.5231	0.963443	0.0604703	0.714151	114.97	3.36239	0.917814	0.0525459	0.662874	113.874	5.80978	0.966186	0.044885	0.595007	447.331	13.3905	0.920516	0.0385374	0.543499	442.799	23.2194	0.966796	0.0401268	0.479031	1763.92	54.2437
130154033		20151019	1	28	173.6	81.1	26.9105	102.4	0.589862	20151019	12.72	0.859	-1.1	-1	4.49	0.912	0.5	0.7	1215.76	46.6481	0.2428	3.74308	0.451574	3.22024	0.541462	0.0284687	0.534992	85.797	3.27311	0.524275	0.0285902	0.534216	85.0984	12.3214	0.551154	0.00778982	0.383976	323.914	12.52	0.534458	0.00791124	0.378172	321.271	48.9643	0.555249	0.00242205	0.258831	1258.26	50.0441
170007483	3	20180220	2	65	160.2	69.3	27.0028	94.5	0.589888	20180220	10.51	0.761	-1.8	0.1	3.05	0.575	-2.1	-0.3	1163.95	67.1508	0.642022	4.12047	1.02212	3.00568	0.789932	0.0201414	0.542221	55.6231	2.93016	0.788769	0.0207403	0.541362	55.1289	11.6263	0.795535	0.00571769	0.386981	208.41	11.2121	0.796659	0.00571187	0.387715	206.449	46.1433	0.797169	0.00190271	0.259207	805.535	43.9556
130036070	3	20130315	1	37	173.9	76.9	25.4289	102.6	0.589994	20130315	19.2	1.196	1.8	1.6	5.12	0.94	0.8	1.2	1294.95	73.8055	0.886209	5.01237	0.439825	4.01542	0.656263	0.0211634	0.521761	149.503	4.04182	0.650655	0.0218405	0.528672	149.185	15.9075	0.666734	0.00765998	0.379385	575.636	15.8018	0.665442	0.00761983	0.383773	574.39	63.805	0.670677	0.00428978	0.26924	2257.75	63.5127
150082664	3	20180411	2	59	162.7	68.8	25.9904	96	0.590043	20180411	16.24	1.1	1.1	2.3	4.45	0.862	0.6	2.3	1286.06	84.3087	0.815098	8.12895	0.557788	4.83333	0.709947	0.0190528	0.513053	143.836	4.25063	0.744349	0.0198519	0.5365	144.071	19.2208	0.716064	0.00656667	0.367971	554.268	16.8747	0.750343	0.00698087	0.387225	555.185	77.1075	0.717037	0.00341806	0.257123	2172.29	67.4045
130034755		20130313	1	39	178.8	83.3	26.0561	105.5	0.590045	20130313	15.7	0.901	-0.7	-0.3	4.73	0.902	0.5	0.9	1237.71	64.8677	0.533035	4.50671	0.54151	3.50972	0.709441	0.0199788	0.520912	104.34	6.40887	0.463305	0.0165528	0.454888	102.143	13.5951	0.719432	0.00569155	0.371333	396.77	25.4969	0.466648	0.00479626	0.314675	387.885	54.1	0.722026	0.0020081	0.254138	1547.1	101.842
480711		20180807	1	49	168.6	95.3	33.5257	99.5	0.590154	20180807	15.21	0.895	-0.8	-0.2	5.28	0.926	0.6	1.4	1197.75	78.998	0.44775	4.26582	0.949437	6.00557	0.66562	0.0127994	0.461392	76.6332	9.35722	0.476435	0.0111794	0.41185	74.6064	23.6304	0.671255	0.00367259	0.3242	290.033	37.3147	0.478495	0.00321274	0.282155	281.898	94.2285	0.673731	0.00139322	0.217456	1128.45	149.538
463315	3	20160419	2	42	158.5	63.4	25.2366	93.6	0.590536	20160419	12.92	0.969	0	0.1	3.67	0.691	-1	-0.5	1290.82	62.1678	0.768417	6.73346	0.269881	1.85495	0.79613	0.0316584	0.610296	148.671	2.2404	0.754431	0.029465	0.587522	147.61	6.99933	0.808069	0.00905802	0.45556	571.041	8.35017	0.771697	0.00864266	0.437531	566.974	27.6357	0.811727	0.00326807	0.32067	2236.91	33.1751
202849		20181213	1	82	174.4	97.2	31.9575	103	0.590596	20181213	15.75	0.932	-0.4	0.5	5.73	0.934	0.7	2.3	1130.54	102.627	0.968622	5.27866	1.04013	5.84146	0.778817	0.0159211	0.498471	43.4795	6.62222	0.746894	0.0141506	0.471785	42.7478	23.031	0.785856	0.00665066	0.360222	162.583	26.5378	0.750969	0.00534321	0.338536	159.512	92.2195	0.788189	0.00358467	0.252854	629.237	107.104
160056790	3	43598	2	37	157.7	70.9	28.5091	93.14	0.590615	43598	13.04	1.017	15.1	0.976	-0.1	0.4	3.49	0.672	-1.4	-0.5	1218.28	56.8561	0.362333	3.18197	0.598346	2.79076	0.728553	0.0238658	0.556865	89.3567	4.36239	0.57049	0.0192265	0.495319	88.3384	10.6087	0.594466	509.607	9.41938	0.916702	0.0269653	0.534688	509.123	14.6667	0.968754	0.0259017	0.464266	2005.02	38.2537
130030212	3	20150529	2	52	160	70.3	27.4609	94.5	0.590625	20150529	12.12	0.867	-0.9	0	3.88	0.837	0.3	1.2	1164.33	56.1357	0.640331	4.07241	1.01068	3.01386	0.696307	0.0242176	0.541235	53.9356	3.1759	0.681851	0.0238785	0.542349	53.4294	11.4934	0.705681	0.00695258	0.394588	200.64	11.9522	0.696326	0.00673913	0.389552	198.805	45.5315	0.709218	0.00233738	0.271609	775.229	47.6136
150134172		20191004	1	47	178.2	95.4	30.0423	105.3	0.590909	20191004	18.04	1.141	11.48	0.779	-1.4	-1.3	3.12	0.601	-2.1	-1.2	1155.19	126.911	1.9586	8.31366	1.1844	2.07228	0.934957	0.023797	0.628205	55.5713	2.81124	0.909953	0.0227329	0.624162	54.8277	7.89818	0.347642	476.919	20.1712	0.65696	0.00472468	0.348592	478.697	79.7571	0.664503	0.00184432	0.234736	1867.29	80.3922
130100061		20151030	1	45	170.4	80.7	27.7929	100.7	0.590962	20151030	22.62	1.308	2.7	2.6	6	1.09	2	2.6	1312.21	66.8237	-0.342219	4.42863	0.472174	2.67687	0.769622	0.0330208	0.585313	169.312	3.20455	0.717469	0.0284661	0.553098	168.911	10.4211	0.781082	0.0122923	0.435226	654.189	12.6143	0.728432	0.00989517	0.405493	652.34	42.0239	0.78296	0.00706154	0.315629	2571.17	50.8686
130162300		20161130	1	59	169.2	76.4	26.6866	100	0.591017	20161130	14.69	0.964	-0.2	0.3	4.62	0.854	0.1	1	1199.82	64.407	0.196833	3.11083	0.812275	6.77163	0.492038	0.0149354	0.441821	75.5497	5.40645	0.590135	0.0160497	0.468103	75.9911	26.633	0.494302	0.00438394	0.303252	285.212	21.1274	0.595046	0.00467352	0.330523	287.08	105.7	0.49464	0.00163081	0.199835	1108.1	83.5129
130162287	3	20160929	2	58	162.9	72.7	27.3963	96.3	0.59116	20160929	10.41	0.735	-2	-0.4	2.44	0.563	-2.2	-0.8	1135.67	53.8471	0.413796	3.58602	0.91885	2.19943	0.759259	0.0273902	0.57358	39.0722	2.13276	0.770721	0.028117	0.581254	38.5339	8.2517	0.77007	0.00756327	0.422753	143.814	7.9339	0.78301	0.00772818	0.423221	141.853	32.6415	0.772409	0.00241219	0.289603	551.995	31.2142
422245		20170323	1	55	170.9	94.1	32.2185	101.1	0.591574	20170323	12.31	0.887	-0.8	-0.2	4.22	0.829	-0.1	0.7	1265.25	62.447	0.0354652	3.10747	0.302519	4.62123	0.615554	0.0173679	0.492011	127.477	4.46248	0.627346	0.017417	0.497929	126.703	18.2382	0.618051	0.00517076	0.343286	487.584	17.246	0.636988	0.00497138	0.350153	484.822	72.4032	0.620441	0.00185567	0.231184	1905.15	68.2843
480554		20180807	1	55	173.6	86.3	28.6359	102.7	0.59159	20180807	14.28	0.86	15.39	0.89	-0.8	-0.3	4.59	0.9	0.4	1	1224.48	45.1765	0.151537	3.46373	0.354576	2.6541	0.596224	0.0316384	0.555489	91.9001	3.25449	0.501458	0.0298376	0.530531	90.8983	10.1792	0.335756	303.641	18.3037	0.694649	0.00445647	0.344378	305.418	79.4583	0.674203	0.00159267	0.221443	1181.17	72.2458
120072044		20151019	1	58	170.2	96.2	33.209	100.7	0.591657	20151019	14.46	0.914	-0.6	0	3.88	0.754	-0.7	0.2	1177.72	57.0819	0.634815	4.49323	0.972575	2.53994	0.753394	0.0247188	0.554543	62.0799	3.31814	0.664556	0.0224155	0.521894	60.9975	9.67796	0.763306	0.00665153	0.402656	232.481	12.8678	0.671981	0.00610212	0.370963	228.142	38.5268	0.764133	0.00205292	0.277286	899.536	50.9235
170120551		20190812	2	63	163.1	73.4	27.5923	96.5	0.591662	20190722	7.91	0.642	-2.8	-0.8	3.24	0.626	-1.7	0.1	1150.99	53.0191	0.243782	2.97292	0.983072	1.94014	0.785068	0.0285862	0.585261	46.566	2.11136	0.767477	0.0277723	0.58686	45.9636	7.21315	0.796579	0.00789362	0.431449	173.105	7.83091	0.780653	0.00765455	0.431638	170.864	28.41	0.798507	0.00233997	0.295497	667.333	30.5382
434102		20171227	1	62	170	93.8	32.4567	100.7	0.592353	20171227	13.64	0.85	-1.1	-0.3	4.42	0.821	-0.2	0.8	1141.72	79.9058	1.04886	6.93606	1.04439	6.02083	0.650333	0.0139088	0.472718	43.1022	6.47279	0.628547	0.0131038	0.443705	43.4156	23.9819	0.654499	0.00413975	0.332102	160.122	25.8646	0.632442	0.00395946	0.307183	161.337	96.2251	0.655337	0.00161146	0.219664	616.851	102.721
170085942		20180620	1	59	178.4	97.2	30.5405	105.7	0.592489	20180620	16.13	0.945	12.12	0.814	-1.4	-0.4	3.78	0.696	-1.2	0	1196.56	57.6788	0.169931	3.22259	0.801813	3.10806	0.7098	0.022112	0.537498	74.032	3.69117	0.649274	0.0205059	0.516939	74.107	11.6445	0.362758	256.806	14.8598	0.67873	0.00541842	0.364564	257.097	59.253	0.681756	0.00179576	0.241985	995.259	58.5978
130093961	3	20131030	1	61	170.4	76.7	26.4153	101	0.592723	20131030	13.91	0.94	-0.4	0.2	4.3	0.824	-0.2	0.8	1165.86	64.2145	0.0949858	3.14702	0.990805	6.20898	0.529687	0.0147694	0.449154	54.6432	5.8	0.55613	0.0153886	0.464804	54.6324	24.3127	0.53451	0.00440673	0.309707	204.044	22.5259	0.56363	0.00457775	0.324891	203.978	96.808	0.536279	0.00174089	0.200056	786.985	90.0556
351763	3	20181012	2	42	167.5	75.2	26.8033	99.3	0.592836	20181012	10.78	0.884	-0.7	-0.5	2.9	0.66	-1.3	-0.8	1249.82	52.7294	-0.648245	4.5726	0.265276	1.64035	0.81758	0.0371394	0.625835	114.222	2.34884	0.726993	0.0312597	0.568867	113.684	6.0589	0.827757	0.0103878	0.471323	434.853	8.87115	0.736794	0.00876118	0.410029	432.664	24.0846	0.828483	0.0030708	0.329273	1696.43	35.1502
510388		20190808	1	51	169.6	75.3	26.1784	100.6	0.59316	20190808	9.71	0.684	-2.2	-0.8	2.79	0.568	-2.5	-0.7	1199.18	70.5982	0.303676	4.05135	0.891492	5.78034	0.615907	0.0146401	0.46374	76.1674	7.63333	0.494552	0.0135581	0.442404	75.0814	22.6214	0.621309	0.00427323	0.32207	288.111	29.8178	0.502456	0.00405504	0.302917	283.812	90.1244	0.623097	0.00162576	0.210427	1118.69	118.922
150065115	3	20190516	2	39	156.1	61.2	25.1157	92.6	0.593209	20190516	11.48	0.779	-1.4	-1.3	3.12	0.601	-2.1	-1.2	1185.77	51.0427	0.33786	3.88066	0.850537	2.05141	0.749332	0.0320031	0.578739	66.5335	2.50081	0.695485	0.0292784	0.559654	65.7161	7.78463	0.759986	0.00865625	0.424312	250.16	9.41428	0.710743	0.00783696	0.406401	246.984	30.7018	0.762972	0.00257445	0.288377	968.635	37.3986
170072845		20190605	2	56	154.8	76	31.7155	91.9	0.593669	20190605	10.17	0.71	-2.2	-0.8	2.57	0.531	-2.5	-1.4	1160.54	47.3726	0.521745	6.03519	1.01384	1.55556	0.779053	0.0406204	0.622477	51.0232	1.62006	0.770259	0.0405705	0.624308	50.7994	5.66272	0.796408	0.0112517	0.468474	189.861	6.0914	0.781326	0.0110741	0.464274	188.863	22.1279	0.800014	0.00325097	0.33015	731.558	23.8454
527936		20200123	2	65	159	67.7	26.779	94.4	0.593711	20200123	8.72	0.741	-2	0.3	3.17	0.752	-0.5	2.3	1261.34	69.0974	1.43121	9.589	0.339382	2.50641	0.783903	0.0227277	0.564883	122.719	2.68558	0.77067	0.0217692	0.549566	123.504	9.38736	0.797163	0.00676079	0.41447	468.648	10.2298	0.780964	0.00647182	0.394979	471.883	37.0394	0.800439	0.00241684	0.289741	1831.4	40.5135
103890		20170428	1	56	169.6	81.2	28.2296	100.7	0.59375	20170428	12.93	0.74	20.86	1.107	1	1.2	5.36	0.922	0.6	1.5	1207.76	74.6349	0.116445	3.29547	0.856551	5.85486	0.656007	0.0130883	0.457001	83.675	10.2014	0.391786	0.0111105	0.39437	81.0878	23.3694	0.295096	272.459	28.9682	0.480409	0.00397479	0.310258	271.067	116.499	0.477581	0.00145873	0.192641	1056.36	115.354
120079869	3	20130612	1	42	165.5	74.8	27.309	98.3	0.593958	20130612	13.92	0.888	-0.8	-0.4	4.51	0.872	0.2	0.8	1183.45	49.8328	0.952871	7.76091	0.886847	2.42451	0.667962	0.0338011	0.578654	63.9024	3.22558	0.559504	0.0303171	0.521567	63.2971	9.35482	0.678154	0.00929085	0.423877	239.865	12.336	0.576274	0.00822269	0.371009	237.61	37.1446	0.680835	0.00276264	0.293233	929.241	48.7198
130036119		20170324	2	52	160.4	69.1	26.8577	95.3	0.59414	20170324	7.93	0.764	-1.8	-0.8	2.98	0.659	-1.3	-0.6	1204.68	61.1725	0.524924	4.32786	0.80308	2.58768	0.770894	0.0239235	0.572031	80.1829	3.19634	0.71544	0.0211498	0.525084	79.6263	9.88498	0.780188	0.00661365	0.423612	302.802	12.3681	0.723746	0.00588428	0.373141	300.545	39.0258	0.783614	0.00217874	0.289803	1177.9	49.31
130171579		20191004	2	56	156	76.2	31.3116	92.7	0.594231	20191004	11.13	0.902	-0.6	0.7	3.35	0.731	-0.7	0.7	1246.19	76.7567	0.803558	5.51494	0.576885	3.65354	0.765532	0.0169268	0.532792	111.337	5.96957	0.619983	0.0136783	0.464433	110.212	13.9384	0.773861	0.00525865	0.377482	425.728	23.4665	0.62306	0.00436949	0.326946	421.055	55.9919	0.774219	0.0022814	0.257458	1661.75	93.641
440674	3	20130916	2	48	164.7	75	27.6487	97.9	0.594414	20130916	9.02	0.757	-1.8	-1.1	2.82	0.683	-1.1	-0.6	1185.1	50.7204	0.37998	3.59287	0.878117	1.80065	0.781965	0.0319578	0.597342	66.3359	2.3498	0.709206	0.0285437	0.568357	65.7931	6.6732	0.79691	0.00894699	0.439611	248.696	8.99144	0.720376	0.0078817	0.411245	246.635	26.0641	0.80017	0.00277158	0.305405	962.764	35.5883
150139708		20191127	1	57	171.4	86.9	29.58	101.9	0.594516	20191127	14.21	1.007	14.47	1.009	0.4	0.8	4.43	0.909	1	1.7	1290.2	58.8544	0.582023	6.39934	0.232516	2.24324	0.757648	0.0274396	0.57296	148.713	3.49099	0.611977	0.023324	0.519289	148.124	8.68994	0.377627	335.026	15.4722	0.643986	0.00568545	0.352798	334.487	51.9867	0.701944	0.00200317	0.257768	1302.07	61.1976
535376		20161018	1	76	169.3	77.7	27.1086	100.7	0.594802	20161018	14.33	0.871	-1	0	3.16	0.599	-2	-0.6	1090.27	57.0696	0.103813	2.68683	0.540482	1.99787	0.789985	0.0327077	0.617326	21.4026	2.06394	0.78183	0.0307432	0.599528	21.4932	7.67574	0.799651	0.00930158	0.453102	76.7515	7.82353	0.794325	0.00899719	0.442252	77.0916	30.5911	0.802268	0.00329307	0.314404	291.052	31.2161
495491		20190613	1	50	173.5	79.7	26.4764	103.3	0.595389	20190613	9.79	0.731	-2.1	-1.3	3.82	0.708	-1.1	-0.4	1163.75	72.785	0.356996	3.73447	1.03149	8.53378	0.468414	0.0124892	0.420274	53.5887	7.49406	0.536662	0.0126326	0.424649	53.8752	34.3176	0.467524	0.0037536	0.285335	200.352	29.5348	0.545325	0.00385679	0.293726	201.795	136.711	0.468829	0.00158361	0.186006	773.557	117.834
270130		20151014	1	29	175.1	90.9	29.6477	104.3	0.59566	20151014	15.84	0.999	14.6	1.085	1	1.4	3.54	0.799	0	0.7	1303.18	68.1821	-0.342495	5.12733	0.479321	1.83844	0.849915	0.03357	0.623032	161.584	2.37333	0.798024	0.0300986	0.583713	161.436	7.02767	0.474227	468.476	6.01429	0.776786	0.0112347	0.470809	468.145	22.6275	0.797969	0.00337152	0.334423	1831.34	23.0879
477774		20180627	1	59	169.1	78.1	27.3126	100.8	0.596097	20180612	10.12	0.712	-2.3	-1.2	3.88	0.785	-0.5	0.4	1128.8	54.2653	0.185781	3.21558	0.875497	3.59928	0.612755	0.022537	0.522863	35.0556	3.75556	0.592099	0.0225526	0.514308	34.4871	13.8941	0.622749	0.00615041	0.373795	128.856	14.3898	0.605384	0.00616581	0.364903	126.712	55.2667	0.624894	0.00198885	0.253046	493.079	57.2763
130070447	3	20150514	1	40	169.7	75.6	26.2517	101.2	0.596346	20150514	15.44	0.956	-0.2	0.1	4.58	0.812	-0.3	0.2	1239.65	68.4949	0.128738	3.24895	0.575456	4.85	0.667526	0.0156619	0.487759	106.504	7.726	0.470637	0.0132082	0.423401	104.999	18.9463	0.670079	0.00465878	0.339366	405.503	30.0363	0.477574	0.0041717	0.296423	399.788	76.0019	0.669621	0.00186557	0.224679	1580.86	120.262
120108280	3	20151117	2	44	167.5	72.9	25.9835	99.9	0.596418	20151117	13.86	1.096	1.1	1.1	3.43	0.855	0.5	0.9	1395.74	61.5702	0.217844	4.12892	0.9586	1.12545	0.660048	0.286355	0.774447	232.972	1.22162	0.614202	0.270853	0.762102	232.942	4.67294	0.686128	0.192572	0.661394	916.838	5.36577	0.624892	0.173802	0.640294	916.283	19.2581	0.696621	0.157855	0.565122	3635.67	22.6333
327469	3	20181212	1	53	167.1	72.7	26.0364	99.7	0.596649	20181212	12.88	0.866	-1	-0.4	3.52	0.701	-1.2	-0.4	1155.95	64.2253	1.30527	9.25658	1.04736	2.8672	0.752287	0.0244334	0.550758	49.4951	3.41708	0.704543	0.0225605	0.530796	49.035	10.9657	0.762312	0.00694019	0.391245	184.376	13.2801	0.711725	0.00620287	0.385767	182.517	43.686	0.763728	0.00218655	0.263287	711.122	53.0964
150153098		20170525	2	34	157.2	68.5	27.7195	93.8	0.596692	20170525	14.52	1.033	0.6	0.6	4.33	0.876	0.7	1	1285.02	58.7794	1.24534	7.96851	0.189495	1.57355	0.809469	0.0330962	0.620805	144.169	2.47905	0.696946	0.028141	0.581071	141.935	5.73549	0.827185	0.0096707	0.470984	553.106	9.52432	0.70916	0.00779858	0.428925	544.046	22.4285	0.831336	0.00347399	0.330273	2166.07	37.7176
190056524	3	44005	2	62	151.7	57.6	25.0295	90.58	0.5971	44005	10.2	0.81	-1.4	0.3	3.95	0.868	0.6	2.6	1395.55	253.325	0.956407	3.32994	1.97806	1.09124	0.96998	0.170488	0.779197	164.839	2.71939	0.924126	0.156359	0.733056	163.847	4.15846	0.972649	0.150936	0.675998	647.99	11.0764	0.925957	0.138867	0.634055	643.902	16.5102	0.973418	0.143532	0.586319	2569.01	44.7727
130037891		20170317	2	51	160.1	67.9	26.4903	95.6	0.597127	20170317	11.32	0.802	-1.4	-0.6	3.74	0.795	-0.1	0.6	1206.78	65.7091	0.784937	5.64834	0.81953	2.18167	0.822724	0.0239383	0.588931	81.8633	2.78437	0.765624	0.0221053	0.559703	81.1231	8.27722	0.831871	0.00675617	0.43096	310.034	10.7888	0.772486	0.0061965	0.406296	306.921	32.94	0.833527	0.00214691	0.298549	1205.79	42.8919
150066499	3	20150521	2	51	170.8	73.6	25.2291	102	0.59719	20150521	13.78	0.95	-0.2	0.4	3.88	0.83	0.3	0.9	1238.33	57.9872	0.551312	4.05134	0.420045	2.8989	0.707005	0.0238602	0.541333	104.207	3.2125	0.676724	0.0230061	0.530905	103.604	11.4872	0.713014	0.0065494	0.381055	397.385	12.7368	0.683081	0.00641544	0.385742	395.006	45.7201	0.714496	0.00221498	0.259907	1548.54	50.7316
190072964		20200626	2	40	159.9	77.4	30.2722	95.5	0.597248	20200626	9.13	0.8	11.33	0.869	-0.9	0.4	3.4	0.758	-0.4	1	1249.36	77.2208	1.39108	7.51033	0.577769	2.50285	0.813924	0.0240887	0.583467	111.823	3.81294	0.707065	0.0202586	0.52494	110.904	9.53561	0.440987	346.304	10.6644	0.695041	0.00778319	0.400556	348.057	33.5061	0.75566	0.0026963	0.30089	1348.97	42.2415
120119729	3	20170915	1	56	171.2	84.8	28.9327	102.3	0.597547	20170915	10.73	0.823	11.2	0.934	-0.3	0.9	3.18	0.711	-0.9	0.6	1256.9	72.6913	0.267931	2.91372	0.500216	1.49673	0.903906	0.0274086	0.639312	123.07	1.79591	0.883806	0.0252504	0.615892	122.171	5.61802	0.385696	339.731	16.2321	0.601531	0.00574898	0.347526	336.521	50.6795	0.691288	0.00209008	0.258641	1322.1	64.4586
359190		20170926	2	77	159.3	77.6	30.5795	95.2	0.597615	20171024	6.13	0.546	12.31	0.81	-0.8	-0.5	4.04	0.789	-0.4	0.5	1245.19	151.228	1.16357	4.36238	1.47232	1.62674	0.957216	0.0344689	0.668427	107.512	2.41502	0.935652	0.0300215	0.648913	106.862	6.21718	0.443646	104.706	9.42562	0.748849	0.00778825	0.410379	103.43	29.3557	0.803232	0.00274627	0.309285	399.893	37.4435
402386		20150918	2	52	160.4	73.3	28.4902	95.9	0.59788	20150918	9.81	0.722	13.46	0.818	-1.4	-0.6	3.42	0.693	-1.2	-0.3	1164.56	50.3242	0.584315	5.80299	1.01033	2.71761	0.657887	0.0299806	0.561226	53.0909	2.88718	0.628992	0.0293248	0.546399	52.9368	10.4324	0.418158	300.647	12.4209	0.747259	0.00576068	0.37968	296.624	36.1527	0.815531	0.00211291	0.286039	1168.06	49.345
130166610		20161212	1	56	174.4	92.8	30.5109	104.4	0.598624	20161212	17.34	1.101	10.6	0.822	-1.3	0.4	2.42	0.518	-2.7	-1.1	1174.6	65.0976	0.47055	3.95586	0.993558	3.28295	0.751897	0.0198364	0.531158	61.4942	4.48377	0.663304	0.017341	0.492297	60.2903	12.5872	0.322184	468.208	19.4505	0.651433	0.00461496	0.345967	466.5	87.7183	0.612421	0.00170943	0.215027	1831.96	78.1907
130158068	3	20181016	1	52	166.2	69.4	25.1245	99.5	0.598676	20181016	11.7	0.829	-1.3	-0.6	3.67	0.751	-0.8	0	1235.25	62.9074	-0.113938	3.58159	0.506945	4.47666	0.639705	0.0174209	0.490845	102.59	5.42656	0.554624	0.0166797	0.474759	101.471	17.3784	0.64904	0.00487024	0.34065	390.114	21.1138	0.56455	0.00465176	0.33457	385.671	69.5842	0.64806	0.00168353	0.226265	1519.54	83.7007
120132531		20161110	1	58	173.5	78.6	26.111	103.9	0.598847	20161110	11.43	0.674	-2.6	-1.5	2.98	0.546	-2.4	-1.5	1112.92	50.5088	0.39182	3.82214	0.690233	2.28838	0.719538	0.0300051	0.576141	28.4449	2.42828	0.694173	0.0297118	0.572177	27.8056	8.78535	0.728848	0.00807265	0.421861	103.63	9.29596	0.705738	0.00788848	0.41755	101.221	34.8429	0.730929	0.00241302	0.288961	394.336	36.7601
120109991		20171115	1	53	176.5	86.2	27.6706	105.7	0.598867	20171115	20.08	1.106	1	1.2	5.28	0.958	0.9	1.7	1223.79	70.1039	0.556778	5.95716	0.680631	5.38009	0.619175	0.0162489	0.468945	93.5656	5.60833	0.607501	0.0160698	0.476386	93.1205	21.2594	0.626166	0.00472281	0.329944	355.49	22.1538	0.614515	0.00462351	0.331622	353.642	85.1048	0.626919	0.00178243	0.2184	1386.21	89.0189
140098875	3	20150417	2	28	164.6	76.9	28.3835	98.6	0.599028	20150417	18.76	1.272	13.4	0.889	-0.8	-0.5	3.53	0.661	-1.5	-1.1	1257.32	45.3003	0.161829	3.1887	0.090779	2.11706	0.683888	0.0334292	0.579861	119.372	3.07243	0.534188	0.029337	0.533522	117.795	8.00595	0.369215	589.225	17.1683	0.723813	0.00731771	0.368126	583.195	68.6358	0.728923	0.00399894	0.25418	2313.44	68.6067
170131139	3	20190826	2	42	165.6	77.7	28.3335	99.2	0.599034	20190826	9.74	0.803	13.2	0.976	0.1	0.5	4.4	0.993	1.8	2.3	1295.88	63.1595	0.660547	4.19798	0.309003	2.36179	0.760906	0.0287711	0.589303	152.743	2.91088	0.702407	0.0263085	0.569036	151.861	9.18564	0.409979	457.503	13.9907	0.72736	0.00554881	0.376235	450.971	43.5473	0.788656	0.00241394	0.285515	1787.8	56.0025
510366		20150604	1	51	172.5	88.8	29.8425	103.4	0.59942	20150604	12.45	0.885	9.44	0.716	-2.2	-1	3.2	0.716	-0.8	0.1	1189.89	50.5818	0.450309	3.74163	0.848131	1.80767	0.776005	0.0319313	0.600618	68.5135	2.40278	0.700401	0.0288252	0.5615	68.2664	6.78253	0.386508	533.444	18.5577	0.651603	0.00560182	0.357819	533.887	58.1667	0.730651	0.00263518	0.267731	2089.63	74.1802
535353		20151005	1	47	167.8	80.3	28.5188	100.6	0.599523	20151005	9.16	0.708	8.02	0.654	-2.7	-0.9	2.91	0.657	-1.4	0.2	1142.49	59.8883	0.297669	3.5892	0.962043	3.79903	0.663839	0.0206685	0.516041	42.8753	4.90278	0.5591	0.0187442	0.481232	42.2569	14.7179	0.417438	340.052	9.66255	0.722832	0.00699895	0.39882	338.482	34.793	0.74983	0.00224443	0.282485	1323.42	38.3066
508393		20200730	1	50	171.8	91.8	31.1026	103.1	0.600116	20200730	16.63	1.012	0.2	0.6	5.11	0.917	0.6	1.3	1197.28	50.34	0.642454	4.89471	0.755981	3.90758	0.492073	0.0254477	0.510741	72.6811	3.34559	0.576354	0.0263737	0.526835	72.8743	14.9106	0.507814	0.00732553	0.366888	273.081	12.8636	0.586881	0.00737805	0.378167	273.878	59.2682	0.509496	0.00243572	0.242873	1057.87	50.9395
130041337		20130325	1	60	172.6	78.9	26.4847	103.6	0.600232	20130325	14.89	0.906	-0.7	0	3.26	0.607	-1.9	-1	1182.17	55.3071	0.0707921	3.19249	0.915579	3.94766	0.603275	0.0205037	0.498137	63.9532	3.67083	0.62606	0.0217187	0.517325	64.4993	15.3285	0.611753	0.0057449	0.347872	240.3	14.3104	0.632766	0.00609954	0.372241	242.388	60.6846	0.614469	0.00196746	0.22984	929.41	56.9
150065937		20190723	1	58	176	92.1	29.7327	105.7	0.600568	20190723	16.48	0.959	15.03	0.932	-0.4	0	4.9	0.852	0	0.7	1220.41	66.0766	0.205525	3.5704	0.671679	3.89662	0.714032	0.0188429	0.530447	92.1729	5.80247	0.577272	0.015302	0.455644	91.4805	14.9934	0.391175	342.278	15.7054	0.643263	0.00578025	0.361636	337.43	47.7293	0.735238	0.0021302	0.268013	1331.73	62.3923
130032155		20130308	1	50	175	84.2	27.4939	105.1	0.600571	20130308	13.9	0.935	-0.4	0	4.12	0.707	-1.1	-0.4	1250.9	55.0482	0.227451	4.21323	0.283831	2.24815	0.753257	0.0299544	0.583675	114.75	3.19406	0.651861	0.026126	0.538374	113.786	8.48201	0.765005	0.00823549	0.429545	438.062	12.2466	0.663467	0.00720721	0.392362	434.334	33.3693	0.768153	0.00254808	0.296527	1709.54	48.4194
150084866		20150715	1	50	169.9	76.2	26.3978	102.1	0.600942	20150715	15.55	1.055	0.6	0.8	4.08	0.858	0.1	0.9	1234.56	67.1069	0.0990129	3.2288	0.559808	4.31669	0.697298	0.0156731	0.491993	102.618	3.93144	0.718377	0.0165897	0.497521	102.507	16.7056	0.704349	0.00452361	0.349299	390.326	15.198	0.72482	0.00472883	0.349706	389.886	66.5264	0.705322	0.00157691	0.232781	1523.3	60.4025
130180515	3	20191129	2	56	168.4	72.9	25.7065	101.3	0.601544	20191129	11.87	0.931	-0.3	0.8	3.02	0.646	-1.5	-0.2	1212.43	63.8548	0.609578	5.76694	0.756859	3.10724	0.733092	0.0208146	0.534395	85.053	2.93182	0.748761	0.0218232	0.544065	84.6156	11.8004	0.743882	0.00584734	0.380734	322.134	11.2084	0.75725	0.00618317	0.396694	320.379	47.3482	0.744244	0.00191462	0.257893	1253.95	44.8006
150052186	3	43087	2	62	159.8	75.5	29.5661	96.2	0.602003	43087	11.33	0.914	9.12	0.73	-2.1	-0.6	2.48	0.544	-2.4	-1.1	1257.25	61.9044	0.502417	4.41768	0.342838	3.50905	0.678936	0.021239	0.529599	119.548	4.66364	0.57459	0.0189532	0.493515	118.32	13.5256	0.588511	528.074	5.46223	0.948549	0.0309802	0.542284	521.052	14.0492	0.968083	0.0277808	0.46374	2080.76	21.706
150142944	3	20181106	2	38	162.6	72.3	27.3462	97.9	0.602091	20181106	11.5	0.876	-0.8	-0.6	2.92	0.627	-1.6	-1.2	1257.62	60.0208	0.861029	4.53696	0.291389	1.41871	0.860821	0.0336507	0.639727	120.346	2.27732	0.769316	0.0279529	0.574776	118.999	5.14503	0.873899	0.00971034	0.484382	460.177	8.46122	0.785744	0.00798535	0.422479	454.897	20.3	0.87644	0.0031278	0.342329	1799.94	33.7902
313533	3	20160919	2	52	162.9	75.3	28.3761	98.1	0.60221	20160919	10.97	0.944	13.13	1	0.3	1.4	3.89	0.858	0.5	2	1288.29	84.1426	0.707911	6.11563	0.580727	4.21173	0.736105	0.0183729	0.522113	145.948	4.27742	0.733954	0.0187713	0.528115	146.513	16.9005	0.37422	355.847	13.1188	0.661199	0.00643619	0.372855	354.867	53.9167	0.651273	0.00212466	0.248316	1386	51.7632
130031431		20150601	2	53	166.7	74.6	26.8453	100.4	0.60228	20150601	9.37	0.831	-1.2	-0.2	3.52	0.742	-0.6	0.3	1221.87	52.2071	0.483471	3.69191	0.448675	2.21542	0.740649	0.0297441	0.58026	91.5262	2.50159	0.704623	0.0289205	0.572595	91.3118	8.34579	0.752544	0.00826633	0.426644	346.616	9.51675	0.716195	0.00833823	0.424366	345.811	32.9436	0.756817	0.00266403	0.2927	1348.98	38.0646
130151418	3	20181226	2	66	166.7	82.4	29.6521	100.4	0.60228	20181226	11.1	0.844	10.03	0.81	-1.4	-0.1	3.2	0.671	-1.2	0	1213.26	61.3552	0.553219	4.66809	0.730808	2.65774	0.764486	0.0237198	0.557759	85.6339	3.55364	0.683427	0.0205297	0.527381	84.6077	9.97024	0.435185	199.924	8.924	0.799875	0.00678598	0.417195	198.153	30.0138	0.834003	0.00215254	0.295871	772.876	35.3724
130034768		20130313	2	35	153	63.4	27.0836	92.2	0.602614	20130313	13.13	1.062	0.8	0.9	3.6	0.738	-0.6	-0.2	1331.51	66.9208	0.614336	3.49025	0.519641	2.03446	0.750303	0.0496252	0.616656	183.004	2.30206	0.716447	0.0453015	0.609393	181.713	7.98371	0.766857	0.024663	0.471844	709.675	9.1651	0.730763	0.0214279	0.468447	704.12	31.8684	0.772852	0.0162075	0.352486	2795.07	36.9431
323018	3	20170404	2	48	164.5	85	31.4114	99.3	0.603647	20170404	16.73	0.996	0.7	0.8	3.75	0.688	-1.5	-0.7	1248.98	64.6178	-0.0628138	3.77083	0.469635	3.22065	0.747323	0.0202552	0.534843	114.163	3.87353	0.694721	0.0179318	0.502232	113.432	12.5081	0.754117	0.00561597	0.379507	435.123	15.0403	0.702727	0.00498684	0.35729	432.316	49.705	0.755496	0.00184501	0.253411	1699.39	60.231
140055517		20160315	1	57	170.1	84.7	29.2735	102.7	0.603762	20160315	14.32	0.843	11.17	0.787	-1.6	0.2	3.2	0.708	-0.9	1	1207.27	51.0772	0.322844	3.37024	0.617906	2.099	0.745614	0.0309378	0.585493	80.8605	2.78075	0.672964	0.0270248	0.547137	80.4906	7.91694	0.325034	249.854	20.3719	0.643718	0.00452127	0.332202	248.608	80.8417	0.653875	0.00168692	0.212677	967.155	80.9113
330683	3	20190118	2	49	168.6	88	30.9576	101.9	0.604389	20190118	12.43	0.867	14.72	0.906	-0.7	-0.3	3.96	0.758	-0.7	-0.2	1228.58	45.9925	0.136186	3.01004	0.309543	2.73182	0.604987	0.0290473	0.537002	95.2288	3.07739	0.547776	0.0285345	0.528941	94.8621	10.4038	0.434313	394.889	9.16389	0.737749	0.00778642	0.414265	392.276	27.9745	0.801923	0.00262843	0.298977	1540.84	36.3294
433227	3	20180222	2	37	167.1	70.8	25.356	101	0.604428	20180222	14.8	1	0.6	0.6	4.2	0.76	-0.3	0.3	1281.44	83.0322	0.633777	5.90831	0.613571	3.86325	0.7648	0.0189426	0.542893	141.148	3.80143	0.761722	0.0183214	0.532787	140.646	15.2571	0.770199	0.00623473	0.396835	543.209	14.9936	0.767468	0.00596122	0.375598	541.161	61.4138	0.77067	0.00297684	0.272116	2130.27	60.1171
456988	3	20130213	2	60	161.6	68.7	26.3072	97.8	0.605198	20130213	12.35	0.836	-1.1	0.4	3.95	0.857	0.5	2.3	1182.46	68.5739	0.0523858	3.15481	0.956496	4.74357	0.679886	0.0150842	0.481067	66.118	5.41071	0.62858	0.0150332	0.467293	65.7249	18.7152	0.683056	0.00427369	0.336738	248.391	21.2811	0.632991	0.0042797	0.325663	246.898	74.8603	0.684163	0.00154131	0.223707	962.603	85.1865
170133153	3	20170926	2	44	161.9	75.3	28.7277	98	0.605312	20170926	11.17	0.851	13.4	0.856	-1.1	-0.5	4.05	0.724	-1	-0.3	1193.44	163.254	1.85802	6.14532	1.38771	1.3575	0.964508	0.0408378	0.702426	72.6351	3.2002	0.915687	0.0335922	0.647705	71.8744	5.08044	0.322383	303.171	18.5618	0.666688	0.00493433	0.336267	307.426	91.4464	0.585192	0.00190286	0.210366	1177.77	73.9208
150058232		20170517	1	41	170.1	96.1	33.2135	103	0.605526	20170517	12.86	0.808	-1.5	-1	3.51	0.668	-1.4	-0.9	1215.4	61.2605	0.0730974	3.32735	0.660732	4.3146	0.63463	0.018299	0.492283	86.8831	4.23831	0.637995	0.0186288	0.501698	86.9844	17.042	0.639393	0.00510787	0.343386	328.625	16.661	0.643721	0.00525721	0.351988	328.945	67.9167	0.64019	0.00181613	0.226365	1279.98	66.2403
479621		20170331	2	57	157.7	72.4	29.1122	95.5	0.60558	20170331	13.13	1	11.58	0.83	-1.2	-0.7	3.17	0.61	-1.8	-1.3	1128.82	129.411	2.72359	12.8465	0.989732	1.16008	0.959525	0.0373912	0.70415	41.7589	2.12121	0.925937	0.0346536	0.67445	40.0657	4.23814	0.373416	561.89	17.0419	0.739241	0.00637586	0.379627	564.234	68.0274	0.740565	0.00300005	0.254967	2203.97	68.6297
467966		20171011	1	72	168.1	87.8	31.0713	101.8	0.605592	20171011	16.37	1.024	9.55	0.711	-2.2	-0.3	3.04	0.637	-1.5	0.2	1176.56	69.1395	0.22096	2.94884	0.972225	3.95772	0.741211	0.0160576	0.49974	62.957	4.38991	0.714036	0.0152013	0.491882	63.0646	15.3665	0.352186	136.302	24.7356	0.575089	0.00409922	0.322339	135.977	75.6447	0.668146	0.00167405	0.23723	522.338	98.8419
130156374	3	20180123	2	50	162	81.3	30.9785	98.2	0.606173	20180123	15.4	1.042	14.45	0.995	0.2	0.3	3.35	0.688	-1.1	-0.7	1244.78	64.7795	0.679871	5.34015	0.493722	2.68492	0.763573	0.0241749	0.572567	109.225	2.8442	0.748592	0.0227643	0.545641	108.497	10.2159	0.378453	371.324	18.2149	0.647759	0.00477635	0.332262	368.745	53.4419	0.745162	0.00185923	0.256381	1446.98	72.5179
231542		20170724	2	38	153.3	67.5	28.7223	93	0.606654	20170724	14.52	1.006	11.23	0.784	-1.6	-0.1	3.35	0.666	-1.3	0.2	1205.47	60.2258	0.263342	3.96869	0.758264	2.0344	0.819491	0.0263947	0.593779	80.7427	2.37512	0.789202	0.0241339	0.570033	80.379	7.56734	0.416633	391.18	15.207	0.722274	0.00496449	0.35913	384.054	34.5139	0.844523	0.00218075	0.288767	1525.74	60.4049
497642		20190215	1	70	170.4	89	30.6514	103.4	0.606808	20190215	14.14	0.85	10.69	0.865	-0.9	-0.5	3.11	0.694	-1	-0.6	1260.14	46.4599	0.161637	3.78089	0.133092	1.54199	0.76888	0.040721	0.625151	122.282	1.88636	0.718776	0.0381009	0.598902	121.477	5.61822	0.351709	254.773	21.5842	0.640222	0.0050582	0.338033	254.797	73.0308	0.693372	0.00196843	0.236079	988.836	86.4623
476674	3	20161222	2	54	158	66.3	26.5582	95.9	0.606962	20161222	10.98	0.988	0.2	1.1	3.22	0.701	-1	0.2	1284.71	60.1663	0.454471	3.75926	0.296508	1.5022	0.845014	0.0326236	0.633179	144.219	1.86341	0.808809	0.0294356	0.604856	143.251	5.5873	0.857024	0.00970484	0.475307	553.836	7.08204	0.819766	0.0086031	0.445879	550.017	22.0392	0.860203	0.00355222	0.338589	2169.88	28.0599
510354		20180928	1	47	173.5	93.1	30.9279	105.4	0.607493	20180928	13.6	0.875	10.63	0.84	-1.1	-0.1	2.75	0.599	-1.9	-1	1244.76	60.3384	0.250617	4.10304	0.41623	3.45635	0.683314	0.022749	0.53893	109.595	3.38996	0.682973	0.0222898	0.522038	108.797	13.3081	0.399238	222.726	11.7578	0.592371	0.00820677	0.389798	220.043	40.2459	0.653699	0.00276144	0.273134	859.64	46.2265
230724		20181121	2	57	159.8	74	28.9787	97.1	0.607635	20181121	10.77	0.813	10.77	0.813	-1.3	0.1	3.6	0.735	-0.6	0.9	1191.13	53.0421	0.0542879	3.74614	0.836601	2.97274	0.662188	0.0256901	0.539234	69.4512	2.77417	0.684285	0.0271182	0.564913	69.5519	11.5108	0.381564	262.006	10.6962	0.693742	0.00737534	0.404538	262.448	45.6714	0.672628	0.002255	0.257162	1014.32	42.3478
431433	3	20150910	1	62	169.1	76.3	26.6832	102.8	0.607924	20150910	13.77	0.923	-0.5	0.1	4.28	0.768	-0.6	0.4	1255.64	58.2612	0.202493	3.45016	0.299995	3.32494	0.685119	0.0210289	0.516593	118.688	4.84244	0.536591	0.0185935	0.482466	118.033	12.9434	0.690737	0.00594075	0.369058	452.971	18.6981	0.548778	0.00524814	0.340051	450.477	51.0549	0.693947	0.00196432	0.249222	1769.32	74.2358
336885		20120726	1	48	169.1	86.5	30.2502	102.8	0.607924	20120726	18.72	1.114	10.71	0.857	-1	0.3	3.11	0.613	-1.8	-0.5	1218.92	62.4024	0.299002	3.35341	0.620274	2.96037	0.756595	0.0221374	0.539715	90.4306	3.89171	0.673717	0.0197392	0.50568	89.745	11.5427	0.414458	420.739	14.726	0.655388	0.00591677	0.361584	416.802	38.3584	0.781919	0.0022503	0.284958	1644.43	58.3997
383213	3	20171229	2	53	158.5	82.4	32.7996	96.4	0.608202	20171229	13.62	0.991	0.2	1	4.52	0.993	1.8	2.9	1297.39	72.4048	0.564052	3.46727	0.453756	2.33887	0.81047	0.0292169	0.59294	154.342	3.11364	0.745125	0.0251321	0.560828	153.201	9.06113	0.821144	0.0114732	0.448413	596.201	12.3529	0.753166	0.0094414	0.412254	591.545	36.2047	0.824435	0.00632532	0.324665	2340.36	49.7393
510366	3	20150604	1	51	165.8	86.7	31.5392	100.9	0.608565	20150604	12.45	0.885	-0.8	-0.3	3.99	0.683	-1.3	-0.5	1279.06	68.8009	0.100385	4.48716	0.388142	3.71953	0.718725	0.0205355	0.540258	138.852	4.74775	0.638172	0.0180131	0.493272	138.976	14.6461	0.727272	0.00614875	0.386508	533.444	18.5577	0.651603	0.00560182	0.357819	533.887	58.1667	0.730651	0.00263518	0.267731	2089.63	74.1802
506616		20160321	1	59	167.5	97.6	34.7873	102	0.608955	20160321	12.76	0.909	-0.6	0	4.45	0.8836	-0.1	0.8	1185.59	53.8202	0.099789	2.9827	0.864921	3.23342	0.659862	0.0234237	0.528121	66.3915	4.49342	0.526404	0.0212747	0.492023	65.7747	12.5758	0.662825	0.006715	0.379812	248.112	17.3331	0.534811	0.00614883	0.348491	245.858	49.665	0.665315	0.00227321	0.256115	960.378	68.9079
481453	1.3	20200603	2	46	161.4	66.3	25.4511	98.3	0.609046	20200603	13.83	0.827	-1.3	-0.7	3.98	0.698	-1.2	-0.5	1140.18	60.8064	0.503456	4.91954	0.970938	4.50113	0.612512	0.0197191	0.500651	41.3129	5.32275	0.534075	0.0182355	0.473013	40.6948	17.4393	0.620298	0.00547033	0.354373	152.54	20.7033	0.541254	0.00510558	0.331658	150.055	69.127	0.62336	0.00178809	0.237403	586.565	82.3681
480228		20190808	2	74	158.6	76.5	30.4127	96.6	0.609079	20190826	8.22	0.66	11.02	0.811	-1.5	-0.5	3.23	0.645	-1.6	-0.6	1213.14	58.9637	0.221055	3.2672	0.659615	4.6449	0.582153	0.0190393	0.48545	85.0701	4.158	0.623645	0.0205002	0.509397	84.4631	18.332	0.591402	74.4318	2.43028	0.921281	0.0153757	0.569136	73.8453	8.00539	0.933337	0.00460415	0.434171	281.85	9.12309
112174		20181214	2	57	159.9	71.3	27.8864	97.4	0.609131	20181214	8.14	0.741	-2	-0.4	2.65	0.579	-2.1	-0.7	1150.89	49.2931	0.436117	4.85573	1.00103	2.56544	0.664875	0.0307191	0.563799	45.5868	2.34072	0.686083	0.0322193	0.570579	45.065	9.68971	0.681036	0.00836721	0.407175	169.01	8.78197	0.703617	0.00895167	0.41829	166.895	38.561	0.682116	0.00267517	0.277288	650.019	34.6874
130180667	3	20141119	1	49	159.5	72	28.3016	97.2	0.609404	20141119	15.23	0.885	10.83	0.734	-2.1	-1.3	3.52	0.756	-0.7	0	1173.82	62.2405	0.152974	4.25804	0.973782	4.45554	0.620781	0.0200473	0.504068	59.4562	5.8416	0.507014	0.0182735	0.472001	58.3664	17.5479	0.329708	256.959	27.3829	0.519502	0.00392857	0.306981	253.129	83.5199	0.637218	0.00160409	0.220479	996.486	109.719
468436		20160513	1	48	172.4	89.3	30.0453	105.1	0.609629	20160513	18.69	1.14	12.39	0.931	-0.4	0.6	2.94	0.572	-2.2		1181.37	196.768	1.70988	5.55726	1.42638	1.58955	0.967496	0.047855	0.728402	67.9932	2.45513	0.950117	0.043208	0.697701	68.255	6.26682	0.401142	583.977	14.6898	0.65924	0.00644859	0.386217	582.465	50.0392	0.71314	0.00276507	0.275961	2289.92	58.6745
413034		20190610	2	57	156.2	64.9	26.6001	95.3	0.610115	20190610	10.26	0.756	-1.8	-0.4	3.59	0.734	-0.6	0.8	1187.29	66.0241	0.416121	3.72889	0.934487	2.88238	0.790558	0.0202168	0.549363	69.479	4.19272	0.684331	0.0178492	0.500728	67.3697	11.1091	0.7973	0.00549793	0.394854	261.695	16.3616	0.690461	0.00494321	0.352696	253.351	43.8327	0.799383	0.0016861	0.270042	1016.1	65.0072
538043	3	20181122	2	76	165.8	73.8	26.8465	101.2	0.610374	20181106	15.12	0.757	-1.6	0.4	2.01	0.389	-4.5	-1.2	1123.91	45.6036	0.641255	3.84811	0.762107	1.53452	0.763808	0.0419926	0.650181	32.2024	1.41063	0.787989	0.0412933	0.642291	32.8213	5.64762	0.778749	0.0121712	0.486551	117.821	5.29589	0.79734	0.0115376	0.479997	120.136	21.9976	0.784637	0.00396542	0.350481	450.306	20.6135
535352		20190813	1	82	167.1	77.2	27.648	102	0.610413	20190813	13.46	0.901	-0.7	-0.2	4.03	0.761	-0.7	0	1072.81	55.8643	0.456764	3.83496	0.375365	2.8155	0.666522	0.034765	0.569958	15.489	2.62745	0.682206	0.0355249	0.576773	15.3273	11.116	0.678944	0.011679	0.418418	54.5905	10.3419	0.694828	0.0116824	0.425367	53.9568	44.5925	0.681672	0.00496	0.293016	204.501	41.547
451981	3	20161004	2	80	163.7	67.7	25.2634	100	0.610874	20160913	6.35	0.571	-3.2	-0.8	2.07	0.432	-4	-0.9	1108.56	40.4628	1.1738	7.7224	0.490349	1.13266	0.78248	0.0558055	0.668174	25.7525	1.075	0.78758	0.0581774	0.675665	25.3964	4.02915	0.802866	0.016001	0.515418	92.9905	3.84464	0.806287	0.0164101	0.518425	91.625	15.7597	0.80691	0.00457328	0.365324	353.271	14.9256
433227		20180222	2	37	154	64.3	27.1125	94.1	0.611039	20180222	14.8	1	0.6	0.6	4.2	0.76	-0.3	0.3	1281.44	83.0322	0.633777	5.90831	0.613571	3.86325	0.7648	0.0189426	0.542893	141.148	3.80143	0.761722	0.0183214	0.532787	140.646	15.2571	0.770199	0.00623473	0.396835	543.209	14.9936	0.767468	0.00596122	0.375598	541.161	61.4138	0.77067	0.00297684	0.272116	2130.27	60.1171
170040026	3	20200429	2	63	164.4	79.2	29.3036	100.5	0.611314	20200429	9.18	0.701	22.62	1.308	2.7	2.6	6	1.09	2	2.6	1312.21	66.8237	-0.342219	4.42863	0.472174	2.67687	0.769622	0.0330208	0.585313	169.312	3.20455	0.717469	0.0284661	0.553098	168.911	10.4211	0.472188	191.678	8.63068	0.737076	0.00842522	0.419002	189.155	22.1174	0.835905	0.00283845	0.330669	740.211	34.1141
523313		20181127	2	48	153.6	64.4	27.2963	93.9	0.611328	20181127	9.83	0.816	-1.3	0.3	2.7	0.663	-1.3	0.4	1202.07	57.1195	0.53216	4.51779	0.778869	2.30432	0.770564	0.0265123	0.568704	77.9781	3.62567	0.642288	0.0219498	0.525294	77.2513	8.66312	0.780495	0.00744495	0.423312	293.593	13.9726	0.649581	0.00606519	0.378872	290.765	34.2126	0.783092	0.00239512	0.292073	1138.47	55.1337
150069962	3	20170605	2	55	156.2	66.7	27.3378	95.5	0.611396	20170605	8.99	0.654	-2.5	-1.3	2.95	0.63	-1.8	-0.3	1144.52	54.2537	0.20139	3.8666	0.973759	1.47907	0.841297	0.034972	0.63845	43.4335	2.47386	0.729879	0.0278338	0.557513	42.6265	5.50512	0.851768	0.00941612	0.476714	161.447	9.53922	0.738567	0.00751978	0.403289	158.197	21.5153	0.855241	0.00271931	0.335078	621.158	37.7339
140148835		20170821	1	50	173.3	79.8	26.5709	106	0.611656	20170821	10.79	0.773	-1.8	-1	3.84	0.803	-0.3	0.4	1225.99	51.4387	0.400733	3.4685	0.389759	2.86116	0.663459	0.0269466	0.540533	94.3208	3.64536	0.558526	0.0252707	0.516767	92.4192	10.9944	0.669386	0.00750821	0.385262	357.261	13.9856	0.56761	0.00702257	0.364834	349.935	43.3421	0.671601	0.00240418	0.260528	1391.72	55.3446
538043	2	43426	2	76	157.8	65.8	26.4248	96.54	0.611787	43410	8.51	0.701	-2.1	0	2.35	0.511	-3.1	-0.3	1137.63	131.045	1.28832	4.71415	1.15461	1.86822	0.95551	0.0404498	0.662634	51.8973	1.72521	0.957622	0.0431921	0.69606	51.5475	7.20155	0.958384	0.0151283	0.509661	197.688	6.53719	0.961002	0.0164094	0.54354	196.696	28.7016	0.958961	0.00756415	0.37692	771.395	25.8843
150038595		20190704	2	49	161.8	71.6	27.3499	99	0.611867	20190704	12.95	0.934	-0.3	0.2	3.33	0.655	-1.4	-0.8	1214.49	56.871	0.918483	7.23234	0.629807	3.4154	0.620878	0.0247376	0.525838	84.8902	3.38249	0.629667	0.0249575	0.536991	84.6075	13.1723	0.633286	0.00693179	0.376437	321.044	13.1759	0.638549	0.00688767	0.383705	319.829	52.5107	0.635016	0.00227613	0.255776	1249.36	52.5522
150144230		20161205	1	41	172.9	93.3	31.2098	105.8	0.611914	20161205	14.54	0.924	-0.5	-0.1	4.11	0.79	-0.5	0.1	1262.43	49.0355	0.562545	4.80431	0.128244	2.15937	0.697173	0.0324135	0.587004	122.934	2.39876	0.661434	0.0308912	0.570018	122.594	8.09097	0.712234	0.00881614	0.432468	469.828	9.11433	0.673685	0.00839253	0.41669	468.552	31.881	0.716913	0.00276686	0.29678	1834.62	36.2975
447644	3	20190826	2	59	157.8	63.6	25.5413	96.6	0.612167	20190826	8.8	0.795	-1.2	0.1	3.09	0.626	-1.8	-0.1	1197.49	57.4637	0.903307	5.89618	0.84477	2.34667	0.756004	0.0278167	0.57765	74.1525	3.3095	0.660878	0.0241427	0.538516	73.1051	9.05167	0.764477	0.00768194	0.421477	279.968	12.6585	0.674957	0.00670783	0.380695	275.866	35.3942	0.76759	0.00255556	0.291826	1085.71	49.5307
150082282	3	20190523	2	51	162.8	74.8	28.2223	99.7	0.612408	20190523	9.7	0.776	12.57	0.934	-0.3	-0.1	4.01	0.925	1.1	1.5	1301.67	62.8377	0.394378	3.27313	0.368634	2.0547	0.793616	0.0330802	0.612335	158.299	3.32946	0.659506	0.0271401	0.552027	157.555	7.90541	0.419964	229.61	12.6642	0.669593	0.00700324	0.387682	226.865	37.2384	0.757675	0.00241746	0.289405	888.056	50.1935
130098432		20190823	1	50	169	88.2	30.8813	103.5	0.612426	20190823	11.61	0.738	9.16	0.708	-2.3	-0.6	2.94	0.515	-2.7	-1.1	1219.68	53.7654	0.534079	4.62016	0.556914	2.29475	0.738703	0.0275315	0.572162	89.7211	2.54578	0.711413	0.0259975	0.551217	89.3045	8.73891	0.514958	186.017	4.45671	0.673564	0.0184398	0.498249	184.327	14.9301	0.728667	0.00532105	0.368161	716.585	17.1282
547354		20180921	1	46	171.2	87.9	29.9903	104.9	0.612734	20180921	8.12	0.633	9.23	0.721	-2.2	-1.4	3.86	0.7	-1.2	-0.5	1170.64	74.0586	0.457698	3.64997	1.03036	6.78468	0.593866	0.0125429	0.445228	58.8323	7.75772	0.535727	0.0120431	0.435504	58.4439	26.6403	0.387286	178.188	11.9771	0.610794	0.00756662	0.388474	177.7	43.6522	0.638794	0.0024108	0.264046	684.356	47.2984
130044253		20130329	1	45	172	81.2	27.4473	105.4	0.612791	20130329	12.6	0.96	-0.1	0.1	4.13	0.866	0.6	1	1285.29	51.4351	0.60188	3.62643	0.163532	1.08369	0.854282	0.0413297	0.672485	144.011	1.99087	0.728202	0.0312227	0.587772	142.362	3.9407	0.8679	0.0117556	0.508629	552.653	7.52596	0.743077	0.00865107	0.432274	545.915	15.2176	0.873395	0.00375799	0.365182	2166.18	29.7894
345073		20160817	2	71	156.1	76.6	31.4357	95.7	0.613069	20160817	9.53	0.731	-2.1	0.1	2.64	0.573	-2.2	0	1154.43	63.7296	0.407633	3.89326	1.00527	3.26272	0.741978	0.0207811	0.533829	49.6732	4.93908	0.607505	0.0176345	0.481616	48.2059	12.5861	0.748326	0.0058862	0.385514	184.379	19.0693	0.61673	0.00504319	0.343314	178.735	50.4314	0.747885	0.00201289	0.261253	711.206	76.1989
120150364	3	20191205	2	40	163.4	67.8	25.3937	100.2	0.613219	20191205	11.73	0.893	-0.6	-0.5	2.96	0.653	-0.14	-0.9	1244.75	47.0311	0.0983398	2.90893	0.169379	1.76458	0.757192	0.0340066	0.597674	109.278	2.02244	0.719228	0.0327616	0.594448	108.372	6.48333	0.770123	0.00980228	0.449468	417.16	7.45792	0.733334	0.00947737	0.444474	413.577	25.5875	0.772476	0.00299961	0.307444	1626.31	29.1157
[truncated: 131 more rows]
[truncated: 14 more columns]

## Sheet: BMI < 25
ID	CT	CT_1	Sex	Age	Height(cm)	Weight(kg)	BMI (kg2/m2)	WC (cm)	ICO (WC/height)	Date gap (days)	BMD	L1-BMC	L1-BMD	L1-T-score	L1-Z-score	hip-BMC	hip-BMD	hip-T-score	hip-Z-score	mean	std	skew	kurt	entropy	Contrast_32	Correlation_32	Energy_32	Homogeneity_32	Autoco_32	Contrast_32_v	Correlation_32_v	Energy_32_v	Homogeneity_32_v	Autoco_32_v	Contrast_64	Correlation_64	Energy_64	Homogeneity_64	Autoco_64	Contrast_64_v	Correlation_64_v	Energy_64_v	Homogeneity_64_v	Autoco_64_v	Contrast_128	Correlation_128	Energy_128	Homogeneity_128	Autoco_128
[truncated: 492 more rows]
[truncated: 15 more columns]

[truncated: 5 more sheets: BMI > 25, WC < 88, WC > 88, ICO < 0.5 , ICO > 0.5]
